# Supplementary material for: Comparative Transcriptome Analysis of the Expression of Antioxidant and Immunity Genes in the Spleen of a Cyanidin 3-O-Glucoside-Treated Alzheimer’s Mouse Model
Source: Antioxidants (Basel). 2021 Sep 9;10(9):1435. doi: 10.3390/antiox10091435 (PMC8472539; doi:10.3390/antiox10091435)
Supplement: Supplementary file 1 [file antioxidants-10-01435-s001.zip › Supplimentary_Tables.xlsx]

## Sheet: Supplementary Tables
Table S1: Primer sequences used in RT-PCR experiment
Sr. No.	Primer Sequences	Direction of Primer	Gene name
1	GTTCCCATTCGCAAACCAGT	LEFT PRIMER	slpi
	TCAGGGATCAGGCTCACATC	RIGHT PRIMER
2	CCCTCCACCTCTGCTGTTAA	LEFT PRIMER	oas2
	AAAGGCCTGTAACCCCTCTC	RIGHT PRIMER
3	AGTGTGAAGTGCAGCTGTTG	LEFT PRIMER	immunoglobulin heavy variable V11-2
	CCAATCCACTCCAGGGTCTT	RIGHT PRIMER
4	ACTGCCTGCAAAGAAATGGG	LEFT PRIMER	cd209e
	ACCATCCAGCCAGTACCATT	RIGHT PRIMER
5	TTGACAAGATCCTGGACCCC	LEFT PRIMER	D630045J12Rik
	TGGTGATGAGTCGGTCCTTC	RIGHT PRIMER
6	AGGAAAGCAGACATCGACCT	LEFT PRIMER	Gm10260
	AGAACCTGGCTGTACTTCCC	RIGHT PRIMER
7	AGTCTCCATCCTCCCTGAGT	LEFT PRIMER	immunoglobulin kappa variable 8-28
	TGCCCCGTAGATCAACAGTT	RIGHT PRIMER
Table S3a: Results of 444 DEGs (up-regulated in normal mice in NM vs AM comparison) according to molecular function in panther enrichment analysis for molecular function
Sr. No.	Molecular Function	No. of Genes
1	molecular transducer activity (GO:0060089)	11	4.5%	6.3%
2	molecular adaptor activity (GO:0060090)	1	0.4%	0.6%
3	binding (GO:0005488)	77	31.3%	44.0%
4	structural molecule activity (GO:0005198)	2	0.8%	1.1%
5	molecular function regulator (GO:0098772)	25	10.2%	14.3%
6	catalytic activity (GO:0003824)	43	17.5%	24.6%
7	transporter activity (GO:0005215)	16	6.5%	9.1%
Table S3b: Results of 444 DEGs (up-regulated in normal mice in NM vs AM comparison) according to cellular component in panther enrichment analysis for cellular components
Sr. No.	Cellular Component	No. of Genes
1	cellular anatomical entity (GO:0110165)	155	63.0%	63.5%
2	protein-containing complex (GO:0032991)	30	12.2%	12.3%
3	intracellular (GO:0005622)	59	24.0%	24.2%
Table S3c: Results of 444 DEGs (up-regulated in normal mice in NM vs AM comparison) according to protein class in panther enrichment analysis for protein class
Sr. No.	Protein Class	No. of Genes
1	cytoskeletal protein (PC00085)	1	0.4%	0.6%
2	transporter (PC00227)	16	6.5%	9.4%
3	scaffold/adaptor protein (PC00226)	2	0.8%	1.2%
4	cell adhesion molecule (PC00069)	4	1.6%	2.4%
5	nucleic acid metabolism protein (PC00171)	3	1.2%	1.8%
6	intercellular signal molecule (PC00207)	13	5.3%	7.6%
7	protein-binding activity modulator (PC00095)	9	3.7%	5.3%
8	gene-specific transcriptional regulator (PC00264)	4	1.6%	2.4%
9	defense/immunity protein (PC00090)	44	17.9%	25.9%
10	translational protein (PC00263)	3	1.2%	1.8%
11	metabolite interconversion enzyme (PC00262)	30	12.2%	17.6%
12	protein modifying enzyme (PC00260)	13	5.3%	7.6%
13	chromatin/chromatin-binding	or -regulatory protein (PC00077)	2	0.8%	0.012
14	membrane traffic protein (PC00150)	6	2.4%	3.5%
15	cell junction protein (PC00070)	1	0.004	0.6%
16	structural protein (PC00211)	1	0.4%	0.6%
17	storage protein (PC00210)	1	0.4%	0.6%
18	transmembrane signal receptor (PC00197)	17	6.9%	10.0%
Table S3d: Results of 444 DEGs (up-regulated in normal mice in NM vs AM comparison) according to pathways in panther enrichment analysis for pathways
Sr. No.	Pathways	No. of Genes
1	N-acetylglucosamine metabolism (P02756)	1	0.4%	2.0%
2	Axon guidance mediated by semaphorins (P00007)	1	0.4%	2.0%
3	Apoptosis signaling pathway (P00006)	4	1.6%	7.8%
4	Histamine H1 receptor mediated signaling pathway (P04385)	1	0.4%	2.0%
5	Interleukin signaling pathway (P00036)	1	0.4%	2.0%
6	Gamma-aminobutyric acid synthesis (P04384)	1	0.4%	2.0%
7	Alzheimer disease-presenilin pathway (P00004)	1	0.4%	2.0%
8	Integrin signalling pathway (P00034)	1	0.4%	2.0%
9	Alzheimer disease-amyloid secretase pathway (P00003)	1	0.4%	2.0%
10	Adrenaline and noradrenaline biosynthesis (P00001)	2	0.8%	3.9%
11	Inflammation mediated by chemokine and cytokine signaling pathway (P00031)	11	4.5%	21.6%
12	Endothelin signaling pathway (P00019)	2	0.8%	3.9%
13	Parkinson disease (P00049)	1	0.4%	2.0%
14	Gonadotropin-releasing hormone receptor pathway (P06664)	1	0.4%	2.0%
15	PI3 kinase pathway (P00048)	1	0.4%	2.0%
16	Thyrotropin-releasing hormone receptor signaling pathway (P04394)	1	0.4%	2.0%
17	Oxidative stress response (P00046)	1	0.4%	2.0%
18	Cell cycle (P00013)	1	0.4%	2.0%
19	Oxytocin receptor mediated signaling pathway (P04391)	1	0.4%	2.0%
20	Cadherin signaling pathway (P00012)	1	0.4%	2.0%
21	Blood coagulation (P00011)	1	0.4%	2.0%
22	CCKR signaling map (P06959)	2	0.8%	3.9%
23	Huntington disease (P00029)	2	0.8%	3.9%
24	Heterotrimeric G-protein signaling pathway-Gq alpha and Go alpha mediated pathway (P00027)	1	0.4%	2.0%
25	Wnt signaling pathway (P00057)	2	0.8%	3.9%
26	Heterotrimeric G-protein signaling pathway-Gi alpha and Gs alpha mediated pathway (P00026)	2	0.8%	3.9%
27	5HT2 type receptor mediated signaling pathway (P04374)	1	0.4%	2.0%
28	Transcription regulation by bZIP transcription factor (P00055)	1	0.4%	2.0%
29	Glycolysis (P00024)	2	0.8%	3.9%
30	Toll receptor signaling pathway (P00054)	1	0.4%	2.0%
31	TGF-beta signaling pathway (P00052)	1	0.4%	2.0%
Table S3e: Results of 444 DEGs (up-regulated in normal mice in NM vs AM comparison) in Reactome pathway analysis
TermID	TermGeneNum	ObservedGeneNum	ExpectedGeneNum	RichFactor	rawP	adjP	TermName	GeneList
R-MMU-380108	53	6	0.495779	12.1022	2.23422e-05	0.00129585	Chemokine_receptors_bind_chemokines	Ccr8;Cxcl2;Cxcl9;Ccl21b;Ccl3;Ccl21a;
R-MMU-2424491	52	6	0.569473	10.5361	1.99882e-05	0.00129585	DAP12_signaling	H2-Q7;H2-Q6;H2-K1;Klrc1;Klrd1;Klrc2;
R-MMU-2172127	60	6	0.499658	12.0082	4.58104e-05	0.00177134	DAP12_interactions	Klrc2;Klrc1;Klrd1;H2-K1;H2-Q7;H2-Q6;
R-MMU-375276	184	9	2.01506	4.46637	0.000175234	0.00508178	Peptide_ligand-binding_receptors	Avpr1a;F2rl1;Cxcl2;Ccl21b;Ccr8;Ccl21a;Npy1r;Cxcl9;Ccl3;
R-MMU-198933	97	6	0.885238	6.77784	0.000653381	0.0135728	Immunoregulatory_interactions_between_a_Lymphoid_and_a_non-Lymphoid_cell	H2-Q7;H2-Q6;Klrd1;Siglecf;Clec2g;H2-K1;
R-MMU-5660668	4	2	0.043806	45.6558	0.00070204	0.0135728	CLEC7A vs inflammasome_pathway	Il1b;Pycard;
R-MMU-373076	297	10	1.52464	6.55892	0.00146886	0.0243411	Class_A/1_(Rhodopsin-like_receptors)	Ptgfr;Cxcl9;Ccl21b;Cxcl2;F2rl1;Avpr1a;Ccl3;Npy1r;Ccl21a;Ccr8;
R-MMU-1236977	25	3	0.233858	12.8283	0.00245813	0.0259221	Endosomal/Vacuolar_pathway	H2-K1;H2-Q6;H2-Q7;
R-MMU-5669034	25	3	0.248118	12.091	0.00245813	0.0259221	TNFs_bind_their_physiological_receptors	Tnfrsf9;Lta;Tnfrsf4;
R-MMU-168256	1573	30	17.2266	1.7415	0.00180501	0.0259221	Immune_System	Klrd1;Tnfrsf4;Il1r2;Cxcl2;Oasl1;Il21;Clec2g;Nlrp1a;Slpi;Atp6v0d2;H2-Q6;Pira2;H2-Q7;C7;Klrc2;Il1b;Pycard;Pdcd1;Klrc1;H2-K1;Hspa8;Lta;Tnfrsf9;C4b;Il12b;H2-Eb2;Fabp5;Cd44;Dusp7;Siglecf;
R-MMU-168249	926	20	10.141	1.97219	0.00240538	0.0259221	Innate_Immune_System	Klrc2;H2-Q7;Fabp5;Cd44;Siglecf;C7;Dusp7;H2-Q6;Pira2;Nlrp1a;Atp6v0d2;C4b;Slpi;Hspa8;Pycard;H2-K1;Klrc1;Klrd1;Cxcl2;Il1b;
R-MMU-74160	1046	3	11.0972	0.270339	0.00393762	0.0380637	Gene_expression_(Transcription)	Ccnd1;Gsr;Zfp870;
R-MMU-1236974	34	3	0.341319	8.78943	0.00595671	0.0531522	ER-Phagosome_pathway	H2-K1;H2-Q6;H2-Q7;
R-MMU-500792	382	10	1.48163	6.7493	0.00877697	0.0678753	GPCR_ligand_binding	Cxcl2;Ccl21b;Avpr1a;F2rl1;Npy1r;Ccl3;Ccr8;Ccl21a;Ptgfr;Cxcl9;
R-MMU-389948	13	2	0.102327	19.5452	0.00855845	0.0678753	PD-1_signaling	H2-Eb2;Pdcd1;
R-MMU-622312	14	2	0.146931	13.6118	0.0099141	0.0685284	Inflammasomes	Pycard;Nlrp1a;
R-MMU-983170	41	3	0.449008	6.6814	0.010043	0.0685284	Antigen_Presentation:_Folding,_assembly_and_peptide_loading_of_class_I_MHC	H2-Q7;H2-Q6;H2-K1;
R-MMU-422085	15	2	0.006845	292.184	0.0113584	0.0725073	Synthesis,_secretion,_and_deacylation_of_Ghrelin	Pla2g7;Pcsk1;
R-MMU-73857	948	3	9.08419	0.330244	0.0118762	0.0725073	RNA_Polymerase_II_Transcription	Zfp870;Ccnd1;Gsr;
R-MMU-888590	18	2	0.197125	10.1458	0.0162023	0.0939733	GABA_synthesis,_release,_reuptake_and_degradation	Hspa8;Gad1;
R-MMU-8876725	19	2	0.208077	9.61183	0.0179807	0.0993219	Protein_methylation	Rps2;Hspa8;
R-MMU-425393	99	4	1.08419	3.68939	0.0230686	0.116346	Transport_of_inorganic_cations/anions_and_amino_acids/oligopeptides	Slc6a19;Slc7a2;Slc26a11;Slc8a2;
R-MMU-1280215	378	9	4.13963	2.17411	0.0223122	0.116346	Cytokine_Signaling_in_Immune_system	Dusp7;Lta;Tnfrsf9;Il1r2;Il1b;Oasl1;Il12b;Tnfrsf4;Il21;
R-MMU-8979227	24	2	0.032854	60.8754	0.0280145	0.129987	Triglyceride_metabolism	Agmo;Fabp5;
R-MMU-6798695	514	11	5.57039	1.97473	0.0273118	0.129987	Neutrophil_degranulation	Cd44;Fabp5;H2-Q7;Siglecf;H2-Q6;Pira2;Slpi;Hspa8;Pycard;H2-K1;Cxcl2;
R-MMU-418360	25	2	0.233858	8.5522	0.0302368	0.134903	Platelet_calcium_homeostasis	Slc8a2;P2rx3;
R-MMU-212436	830	3	9.08967	0.330045	0.0331726	0.142519	Generic_Transcription_Pathway	Zfp870;Ccnd1;Gsr;
R-MMU-499943	27	2	0.252567	7.91869	0.0348828	0.144514	Interconversion_of_nucleotide_di-_and_triphosphates	Gsr;Ak7;
R-MMU-216083	69	3	0.692676	4.33103	0.0396819	0.158728	Integrin_cell_surface_interactions	Itgb8;Cd44;Spp1;
R-MMU-352230	31	2	0.339493	5.89114	0.0449332	0.173742	Amino_acid_transport_across_the_plasma_membrane	Slc7a2;Slc6a19;
R-MMU-163125	79	3	0.720967	4.16108	0.0554445	0.20747	Post-translational_modification:_synthesis_of_GPI-anchored_proteins	Vnn3;Izumo1r;Lypd6b;
R-MMU-977606	36	2	0.394251	5.07291	0.0587867	0.213102	Regulation_of_Complement_cascade	C4b;C7;
R-MMU-1799339	89	3	0.761465	3.93977	0.0737411	0.259211	SRP-dependent_cotranslational_protein_targeting_to_membrane	Rps18;Rps2;Rpl29;
R-MMU-975956	91	3	0.996578	3.0103	0.0776871	0.26413	Nonsense_Mediated_Decay_(NMD)_independent_of_the_Exon_Junction_Complex_(EJC)	Rpl29;Rps18;Rps2;
R-MMU-1236975	92	3	1.00753	2.97758	0.0796944	0.26413	Antigen_processing-Cross_presentation	H2-K1;H2-Q7;H2-Q6;
R-MMU-72689	98	3	0.50308	5.96327	0.0922049	0.264418	Formation_of_a_pool_of_free_40S_subunits	Rps18;Rps2;Rpl29;
R-MMU-8848021	45	2	0.38501	5.19467	0.0867817	0.264418	Signaling_by_PTK6	Gpnmb;Ccnd1;
R-MMU-5668541	97	3	0.962697	3.11625	0.0900655	0.264418	TNFR2_non-canonical_NF-kB_pathway	Lta;Tnfrsf9;Tnfrsf4;
R-MMU-166658	45	2	0.467146	4.28132	0.0867817	0.264418	Complement_cascade	C7;C4b;
R-MMU-168643	47	2	0.514716	3.88564	0.093458	0.264418	Nucleotide-binding_domain,_leucine_rich_repeat_containing_receptor_(NLR)_signaling_pathways	Nlrp1a;Pycard;
R-MMU-9006927	45	2	0.492813	4.05833	0.0867817	0.264418	Signaling_by_Non-Receptor_Tyrosine_Kinases	Ccnd1;Gpnmb;
R-MMU-112310	48	2	0.010951	182.632	0.0968507	0.267493	Neurotransmitter_release_cycle	Hspa8;Gad1;
R-MMU-975957	111	3	0.506502	5.92298	0.121846	0.272453	Nonsense_Mediated_Decay_(NMD)_enhanced_by_the_Exon_Junction_Complex_(EJC)	Rpl29;Rps18;Rps2;
R-MMU-72649	58	2	0.529318	3.77845	0.132511	0.272453	Translation_initiation_complex_formation	Rps2;Rps18;
R-MMU-2980736	58	2	0.542551	3.68629	0.132511	0.272453	Peptide_hormone_metabolism	Pla2g7;Pcsk1;
R-MMU-8957275	113	3	1.16016	2.58584	0.126687	0.272453	Post-translational_protein_phosphorylation	C4b;Fam20c;Spp1;
R-MMU-418594	346	7	3.55236	1.97052	0.105095	0.272453	G_alpha_(i)_signalling_events	Rgs13;Cxcl9;Ccl21b;Cxcl2;Ccl21a;Ccr8;Npy1r;
R-MMU-156827	108	3	1.14579	2.61828	0.114719	0.272453	L13a-mediated_translational_silencing_of_Ceruloplasmin_expression	Rps18;Rps2;Rpl29;
R-MMU-72613	116	3	1.23066	2.43771	0.134077	0.272453	Eukaryotic_Translation_Initiation	Rpl29;Rps18;Rps2;
R-MMU-72737	116	3	1.23066	2.43771	0.134077	0.272453	Cap-dependent_Translation_Initiation	Rps2;Rps18;Rpl29;
R-MMU-927802	111	3	1.20294	2.49388	0.121846	0.272453	Nonsense-Mediated_Decay_(NMD)	Rps2;Rps18;Rpl29;
R-MMU-72695	51	2	0.558522	3.58088	0.107233	0.272453	Formation_of_the_ternary_complex,_and_subsequently,_the_43S_complex	Rps2;Rps18;
R-MMU-72706	109	3	1.1937	2.51319	0.117077	0.272453	GTP_hydrolysis_and_joining_of_the_60S_ribosomal_subunit	Rpl29;Rps2;Rps18;
R-MMU-388841	57	2	0.62423	3.20395	0.128819	0.272453	Costimulation_by_the_CD28_family	H2-Eb2;Pdcd1;
R-MMU-5576891	113	3	1.23751	2.42422	0.126687	0.272453	Cardiac_conduction	Scn3a;Fxyd6;Slc8a2;
R-MMU-72662	59	2	0.646133	3.09534	0.136226	0.272453	Activation_of_the_mRNA_upon_binding_of_the_cap-binding_complex_and_eIFs,_and_subsequent_binding_to_43S	Rps2;Rps18;
R-MMU-5578775	51	2	0.558522	3.58088	0.107233	0.272453	Ion_homeostasis	Fxyd6;Slc8a2;
R-MMU-72702	58	2	0.635181	3.14871	0.132511	0.272453	Ribosomal_scanning_and_start_codon_recognition	Rps2;Rps18;
R-MMU-381426	119	3	1.30322	2.302	0.141614	0.278427	Regulation_of_Insulin-like_Growth_Factor_(IGF)_transport_and_uptake_by_Insulin-like_Growth_Factor_Binding_Proteins_(IGFBPs)	C4b;Fam20c;Spp1;
R-MMU-372790	1024	16	4.90623	3.26116	0.147593	0.280668	Signaling_by_GPCR	Cxcl9;Ptgfr;Cxcl2;Ccr8;Ccl3;Ccl21b;Gpr15;Npy1r;Rgs13;Olfr101;Gpr176;Olfr1258;Ccl21a;Rasgrf2;Avpr1a;F2rl1;
R-MMU-2142753	62	2	0.622405	3.21334	0.14751	0.280668	Arachidonic_acid_metabolism	Aloxe3;Ptgs2;
R-MMU-556833	594	10	6.50513	1.53725	0.151617	0.28367	Metabolism_of_lipids	Hsd17b14;Acsf2;Acer2;Agmo;Aloxe3;Fabp5;Cyp2r1;Mtmr7;Ptgs2;Gpat3;
R-MMU-416476	198	4	2.03285	1.96768	0.171678	0.316105	G_alpha_(q)_signalling_events	Ptgfr;F2rl1;Avpr1a;Rgs13;
R-MMU-418346	71	2	0.664157	3.01134	0.182374	0.325468	Platelet_homeostasis	P2rx3;Slc8a2;
R-MMU-3214858	71	2	0.77755	2.57218	0.182374	0.325468	RMTs_methylate_histone_arginines	Rps2;Ccnd1;
R-MMU-1474228	137	3	0.703285	4.2657	0.18952	0.333096	Degradation_of_the_extracellular_matrix	A2m;Spp1;Cd44;
R-MMU-388396	993	15	3.1718	4.72918	0.193036	0.334212	GPCR_downstream_signalling	Ccl21b;Avpr1a;F2rl1;Rasgrf2;Ccr8;Ccl21a;Olfr1258;Gpr176;Olfr101;Rgs13;Cxcl2;Npy1r;Ptgfr;Cxcl9;Gpr15;
R-MMU-449147	258	5	2.20739	2.26512	0.208394	0.355496	Signaling_by_Interleukins	Dusp7;Il21;Il1b;Il1r2;Il12b;
R-MMU-5653656	570	3	6.2423	0.480592	0.214295	0.360264	Vesicle-mediated_transport	Rab6b;Hspa8;Copz2;
R-MMU-5607764	90	2	0.985626	2.02917	0.258869	0.428983	CLEC7A_(Dectin-1)_signaling	Pycard;Il1b;
R-MMU-9020702	94	2	0.332421	6.01647	0.275157	0.449552	Interleukin-1_signaling	Il1b;Il1r2;
R-MMU-15869	95	2	0.76945	2.59926	0.279228	0.449867	Metabolism_of_nucleotides	Ak7;Gsr;
R-MMU-199991	537	3	4.65571	0.644369	0.28497	0.45283	Membrane_Trafficking	Copz2;Hspa8;Rab6b;
R-MMU-425407	224	4	2.09537	1.90897	0.312439	0.48977	SLC-mediated_transmembrane_transport	Slc6a19;Slc7a2;Slc26a11;Slc8a2;
R-MMU-446652	106	2	1.11248	1.79778	0.323829	0.500855	Interleukin-1_family_signaling	Il1b;Il1r2;
R-MMU-5621481	108	2	0.862423	2.31905	0.331878	0.506551	C-type_lectin_receptors_(CLRs)	Pycard;Il1b;
R-MMU-114608	115	2	1.25941	1.58804	0.359828	0.542079	Platelet_degranulation_	Lgals3bp;A2m;
R-MMU-8957322	117	2	1.28131	1.5609	0.36774	0.546896	Metabolism_of_steroids	Cyp2r1;Hsd17b14;
R-MMU-76005	120	2	0.574949	3.47857	0.379538	0.550331	Response_to_elevated_platelet_cytosolic_Ca2+	A2m;Lgals3bp;
R-MMU-597592	1242	10	13.6016	0.735205	0.376032	0.550331	Post-translational_protein_modification	Rps2;Izumo1r;Lypd6b;Hspa8;C4b;Copz2;Vnn3;Spp1;Rab6b;Fam20c;
R-MMU-8856688	124	2	1.15994	1.72423	0.395128	0.565862	Golgi-to-ER_retrograde_transport	Copz2;Rab6b;
R-MMU-72312	172	3	0.824093	3.64037	0.438995	0.568349	rRNA_processing	Rps2;Rps18;Rpl29;
R-MMU-983712	171	3	1.05339	2.84795	0.437666	0.568349	Ion_channel_transport	Fxyd6;Atp6v0d2;Trpv3;
R-MMU-194315	366	2	3.13142	0.638688	0.44096	0.568349	Signaling_by_Rho_GTPases	A2m;Rasgrf2;
R-MMU-8978868	172	3	1.60894	1.86458	0.438995	0.568349	Fatty_acid_metabolism	Aloxe3;Acsf2;Ptgs2;
R-MMU-381753	360	2	3.36756	0.593903	0.440468	0.568349	Olfactory_Signaling_Pathway	Olfr1258;Olfr101;
R-MMU-382551	651	9	6.16393	1.46011	0.432382	0.568349	Transport_of_small_molecules	Slc7a2;Atp6v0d2;A2m;Trpv3;Cyb5r4;Fxyd6;Slc8a2;Slc6a19;Slc26a11;
R-MMU-8868773	172	3	1.72667	1.73745	0.438995	0.568349	rRNA_processing_in_the_nucleus_and_cytosol	Rps18;Rps2;Rpl29;
R-MMU-397014	166	3	1.81793	1.65023	0.431354	0.568349	Muscle_contraction	Slc8a2;Scn3a;Fxyd6;
R-MMU-6791226	172	3	1.88364	1.59266	0.438995	0.568349	Major_pathway_of_rRNA_processing_in_the_nucleolus_and_cytosol	Rpl29;Rps2;Rps18;
R-MMU-112315	199	3	2.04312	1.46834	0.481493	0.613772	Transmission_across_Chemical_Synapses	Hspa8;Tomt;Gad1;
R-MMU-8953854	546	4	5.60575	0.713553	0.52552	0.662613	Metabolism_of_RNA	Rps2;Rpl29;Hspa8;Rps18;
R-MMU-1474244	270	4	2.86448	1.39642	0.542207	0.676301	Extracellular_matrix_organization	A2m;Itgb8;Spp1;Cd44;
R-MMU-2262752	418	3	3.57632	0.838852	0.62971	0.769167	Cellular_responses_to_stress	Gsr;Hspa8;Atp6v0d2;
R-MMU-8953897	420	3	3.83299	0.782679	0.629921	0.769167	Cellular_responses_to_external_stimuli	Hspa8;Atp6v0d2;Gsr;
R-MMU-194840	139	2	1.52225	1.31385	0.665676	0.804358	Rho_GTPase_cycle	Rasgrf2;A2m;
R-MMU-1430728	1750	17	12.1777	1.39599	0.699949	0.828511	Metabolism	Cyp2r1;Gpat3;Gnpda1;Mtmr7;Hsd17b14;Aloxe3;Plcd3;Ak7;Cd44;Fabp5;Ptgs2;D2hgdh;Acsf2;Acer2;Agmo;Mgst2;Gsr;
R-MMU-1280218	666	8	5.2423	1.52605	0.69955	0.828511	Adaptive_Immune_System	Siglecf;H2-Q7;H2-Q6;H2-Eb2;Clec2g;Klrd1;Pdcd1;H2-K1;
R-MMU-72766	221	3	1.94125	1.5454	0.736035	0.845347	Translation	Rps18;Rps2;Rpl29;
R-MMU-6811442	178	2	1.66507	1.20115	0.72228	0.845347	Intra-Golgi_and_retrograde_Golgi-to-ER_traffic	Copz2;Rab6b;
R-MMU-162582	2353	24	23.6213	1.01603	0.729669	0.845347	Signal_Transduction	Ccr8;Ccl3;Cxcl2;Atp6v0d2;Ptgfr;Rasgrf2;Ccnd1;Avpr1a;Fabp5;Gpr176;Npy1r;Ccl21b;Cilp;Cxcl9;Spp1;Ccl21a;F2rl1;Rgs13;Olfr101;Dusp7;Olfr1258;A2m;Gpr15;Gpnmb;
R-MMU-5683057	285	2	3.12115	0.640789	0.77174	0.877665	MAPK_family_signaling_cascades	Rasgrf2;Dusp7;
R-MMU-112316	323	4	2.76352	1.44743	0.781387	0.880009	Neuronal_System	Hspa8;Gad1;Kcnh7;Tomt;
R-MMU-392499	1584	16	17.347	0.922348	0.790912	0.882171	Metabolism_of_proteins	Creb3l3;Dmbt1;Copz2;Hspa8;C4b;Lypd6b;Pcsk1;Izumo1r;Rps2;Fam20c;Rps18;Rab6b;Spp1;Rpl29;Vnn3;Pla2g7;
R-MMU-418555	477	4	5.06058	0.790424	0.81977	0.905651	G_alpha_(s)_signalling_events	Olfr1258;Gpr176;Olfr101;Gpr15;
R-MMU-71387	264	2	0.271047	7.37879	1	1	Metabolism_of_carbohydrates	Cd44;Gnpda1;
R-MMU-1483257	186	2	1.46407	1.36606	1	1	Phospholipid_metabolism	Mtmr7;Gpat3;
R-MMU-4839726	202	2	1.63609	1.22242	1	1	Chromatin_organization	Ccnd1;Rps2;
R-MMU-109582	504	5	4.25462	1.17519	1	1	Hemostasis	Lgals3bp;Slc8a2;P2rx3;A2m;Cd44;
R-MMU-9006934	399	4	3.50479	1.14129	1	1	Signaling_by_Receptor_Tyrosine_Kinases	Cilp;Atp6v0d2;Dusp7;Spp1;
R-MMU-983169	340	3	3.41319	0.878944	1	1	Class_I_MHC_mediated_antigen_processing_&_presentation	H2-Q6;H2-K1;H2-Q7;
R-MMU-5684996	262	2	2.7796	0.719527	1	1	MAPK1/MAPK3_signaling	Dusp7;Rasgrf2;
R-MMU-3247509	202	2	2.14305	0.933248	1	1	Chromatin_modifying_enzymes	Ccnd1;Rps2;
R-MMU-211859	209	2	2.21732	0.901991	1	1	Biological_oxidations	Mgst2;Cyp2r1;
R-MMU-5673001	256	2	2.80356	0.713379	1	1	RAF/MAP_kinase_cascade	Dusp7;Rasgrf2;
R-MMU-76002	241	2	2.63929	0.75778	1	1	Platelet_activation,_signaling_and_aggregation	A2m;Lgals3bp;
Table S3f: Results of 444 DEGs (up-regulated in normal mice in NM vs AM comparison) according to biological function in panther enrichment analysis for biological function
Sr. No.	Biological Function	No. of Genes
1	developmental process (GO:0032502)	7	2.8%	1.2%
2	multicellular organismal process (GO:0032501)	11	4.5%	1.9%
3	cellular process (GO:0009987)	120	48.8%	20.8%
4	reproduction (GO:0000003)	4	1.6%	0.7%
5	localization (GO:0051179)	45	18.3%	7.8%
6	reproductive process (GO:0022414)	4	1.6%	0.7%
7	multi-organism process (GO:0051704)	3	1.2%	0.5%
8	biological adhesion (GO:0022610)	9	3.7%	1.6%
9	immune system process (GO:0002376)	57	23.2%	9.9%
10	biological regulation (GO:0065007)	78	31.7%	13.5%
11	growth (GO:0040007)	1	0.4%	0.2%
12	signaling (GO:0023052)	43	17.5%	7.5%
13	metabolic process (GO:0008152)	73	29.7%	12.7%
14	interspecies interaction between organisms (GO:0044419)	31	12.6%	5.4%
15	pigmentation (GO:0043473)	1	0.4%	0.2%
16	response to stimulus (GO:0050896)	81	32.9%	14.0%
17	biological phase (GO:0044848)	1	0.4%	0.2%
18	locomotion (GO:0040011)	8	3.3%	1.4%
Table S4a: Results of 904 DEGs (down-regulated in normal mice in NM vs AM comparison) according to in panther enrichment analysis for molecular function
Sr. No.	Molecular Function	No. of Genes
1	translation regulator activity (GO:0045182)	1	0.002	0.002
2	molecular transducer activity (GO:0060089)	12	2.3%	2.9%
3	molecular adaptor activity (GO:0060090)	4	0.8%	1.0%
4	binding (GO:0005488)	162	31.0%	39.8%
5	structural molecule activity (GO:0005198)	4	0.8%	1.0%
6	molecular function regulator (GO:0098772)	67	12.8%	16.5%
7	catalytic activity (GO:0003824)	120	23.0%	29.5%
8	transporter activity (GO:0005215)	37	7.1%	9.1%
Table S4b: Results of 904 DEGs (down-regulated in normal mice in NM vs AM comparison)in panther enrichment analysis for cellular components
Sr. No.	Cellular Component	No. of Genes
1	cellular anatomical entity (GO:0110165)	302	57.9%	54.5%
2	protein-containing complex (GO:0032991)	51	9.8%	9.2%
3	intracellular (GO:0005622)	201	38.5%	36.3%
Table S4c: Results of 904 DEGs (down-regulated in normal mice in NM vs AM comparison) in panther enrichment analysis for protein class
Sr. No.	Protein Class	No. of Genes
1	extracellular matrix protein (PC00102)	8	1.5%	2.4%
2	cytoskeletal protein (PC00085)	21	4.0%	6.3%
3	transporter (PC00227)	38	7.3%	11.4%
4	scaffold/adaptor protein (PC00226)	8	1.5%	2.4%
5	cell adhesion molecule (PC00069)	5	1.0%	1.5%
6	nucleic acid metabolism protein (PC00171)	9	1.7%	2.7%
7	intercellular signal molecule (PC00207)	12	2.3%	3.6%
8	protein-binding activity modulator (PC00095)	15	2.9%	4.5%
9	viral or transposable element protein (PC00237)	1	0.2%	0.3%
10	calcium-binding protein (PC00060)	2	0.4%	0.6%
11	gene-specific transcriptional regulator (PC00264)	28	5.4%	8.4%
12	defense/immunity protein (PC00090)	19	3.6%	5.7%
13	translational protein (PC00263)	3	0.6%	0.9%
14	metabolite interconversion enzyme (PC00262)	55	10.5%	16.5%
15	protein modifying enzyme (PC00260)	39	0.075	11.7%
16	chromatin/chromatin-binding	or -regulatory protein (PC00077)	28	5.4%
17	transfer/carrier protein (PC00219)	3	0.6%	0.9%
18	membrane traffic protein (PC00150)	10	1.9%	3.0%
19	chaperone (PC00072)	7	1.3%	2.1%
20	cell junction protein (PC00070)	1	0.2%	0.3%
21	structural protein (PC00211)	1	0.2%	0.3%
22	transmembrane signal receptor (PC00197)	21	0.04	0.063
Table S4d: Results of 904 DEGs (down-regulated in normal mice in NM vs AM comparison) in panther enrichment analysis for pathways
Sr. No.	Pathways	No. of Genes
1	SCW signaling pathway (P06216)	1	0.002	0.006
2	DPP signaling pathway (P06213)	1	0.002	0.006
3	DPP-SCW signaling pathway (P06212)	1	0.002	0.006
4	BMP/activin signaling pathway-drosophila (P06211)	1	0.002	0.006
5	Axon guidance mediated by Slit/Robo (P00008)	1	0.002	0.006
6	Apoptosis signaling pathway (P00006)	2	0.004	0.012
7	Gonadotropin-releasing hormone receptor pathway (P06664)	2	0.004	0.012
8	Pyridoxal-5-phosphate biosynthesis (P02759)	1	0.002	0.006
9	Angiogenesis (P00005)	6	0.011	0.037
10	Alzheimer disease-presenilin pathway (P00004)	1	0.002	0.006
11	Alzheimer disease-amyloid secretase pathway (P00003)	1	0.002	0.006
12	Alpha adrenergic receptor signaling pathway (P00002)	1	0.002	0.006
13	CCKR signaling map (P06959)	3	0.006	0.019
14	Ubiquitin proteasome pathway (P00060)	2	0.004	0.012
15	p53 pathway (P00059)	6	0.011	0.037
16	Wnt signaling pathway (P00057)	4	0.008	0.025
17	Heme biosynthesis (P02746)	6	0.011	0.037
18	VEGF signaling pathway (P00056)	2	0.004	0.012
19	Transcription regulation by bZIP transcription factor (P00055)	1	0.002	0.006
20	Formyltetrahydroformate biosynthesis (P02743)	1	0.002	0.006
21	Tetrahydrofolate biosynthesis (P02742)	1	0.002	0.006
22	TGF-beta signaling pathway (P00052)	1	0.002	0.006
23	Plasminogen activating cascade (P00050)	2	0.004	0.012
24	De novo pyrimidine deoxyribonucleotide biosynthesis (P02739)	2	0.004	0.012
25	Parkinson disease (P00049)	2	0.004	0.012
26	De novo purine biosynthesis (P02738)	1	0.002	0.006
27	PI3 kinase pathway (P00048)	1	0.002	0.006
28	PDGF signaling pathway (P00047)	2	0.004	0.012
29	Oxidative stress response (P00046)	1	0.002	0.006
30	Notch signaling pathway (P00045)	1	0.002	0.006
31	Nicotinic acetylcholine receptor signaling pathway (P00044)	5	0.01	0.031
32	Muscarinic acetylcholine receptor 2 and 4 signaling pathway (P00043)	3	0.006	0.019
33	Muscarinic acetylcholine receptor 1 and 3 signaling pathway (P00042)	3	0.006	0.019
34	Metabotropic glutamate receptor group I pathway (P00041)	1	0.002	0.006
35	Asparagine and aspartate biosynthesis (P02730)	1	0.002	0.006
36	Metabotropic glutamate receptor group II pathway (P00040)	2	0.004	0.012
37	Synaptic vesicle trafficking (P05734)	1	0.002	0.006
38	GABA-B receptor II signaling (P05731)	4	0.008	0.025
39	Endogenous cannabinoid signaling (P05730)	2	0.004	0.012
40	Ascorbate degradation (P02729)	1	0.002	0.006
41	Metabotropic glutamate receptor group III pathway (P00039)	3	0.006	0.019
42	Ionotropic glutamate receptor pathway (P00037)	1	0.002	0.006
43	Integrin signalling pathway (P00034)	5	0.01	0.031
44	Vitamin B6 metabolism (P02787)	1	0.002	0.006
45	p53 pathway feedback loops 2 (P04398)	1	0.002	0.006
46	Inflammation mediated by chemokine and cytokine signaling pathway (P00031)	7	0.013	0.043
47	Hypoxia response via HIF activation (P00030)	1	0.002	0.006
48	Vasopressin synthesis (P04395)	1	0.002	0.006
49	Thyrotropin-releasing hormone receptor signaling pathway (P04394)	2	0.004	0.012
50	Oxytocin receptor mediated signaling pathway (P04391)	1	0.002	0.006
51	Huntington disease (P00029)	2	0.004	0.012
52	Heterotrimeric G-protein signaling pathway-rod outer segment phototransduction (P00028)	1	0.002	0.006
53	Heterotrimeric G-protein signaling pathway-Gq alpha and Go alpha mediated pathway (P00027)	5	0.01	0.031
54	p38 MAPK pathway (P05918)	1	0.002	0.006
55	Heterotrimeric G-protein signaling pathway-Gi alpha and Gs alpha mediated pathway (P00026)	6	0.011	0.037
56	Hedgehog signaling pathway (P00025)	1	0.002	0.006
57	Glycolysis (P00024)	2	0.004	0.012
58	Nicotine pharmacodynamics pathway (P06587)	2	0.004	0.012
59	Enkephalin release (P05913)	1	0.002	0.006
60	FGF signaling pathway (P00021)	2	0.004	0.012
61	Dopamine receptor mediated signaling pathway (P05912)	2	0.004	0.012
62	FAS signaling pathway (P00020)	1	0.002	0.006
63	Histamine H2 receptor mediated signaling pathway (P04386)	1	0.002	0.006
64	Histamine H1 receptor mediated signaling pathway (P04385)	1	0.002	0.006
65	Pyridoxal phosphate salvage pathway (P02770)	1	0.002	0.006
66	Endothelin signaling pathway (P00019)	3	0.006	0.019
67	EGF receptor signaling pathway (P00018)	2	0.004	0.012
68	DNA replication (P00017)	2	0.004	0.012
69	Cytoskeletal regulation by Rho GTPase (P00016)	4	0.008	0.025
70	Cell cycle (P00013)	1	0.002	0.006
71	Cadherin signaling pathway (P00012)	2	0.004	0.012
72	Blood coagulation (P00011)	3	0.006	0.019
73	Beta2 adrenergic receptor signaling pathway (P04378)	1	0.002	0.006
74	Beta1 adrenergic receptor signaling pathway (P04377)	1	0.002	0.006
75	5HT4 type receptor mediated signaling pathway (P04376)	1	0.002	0.006
76	Pentose phosphate pathway (P02762)	1	0.002	0.006
77	5HT3 type receptor mediated signaling pathway (P04375)	1	0.002	0.006
78	5HT2 type receptor mediated signaling pathway (P04374)	3	0.006	0.019
79	5HT1 type receptor mediated signaling pathway (P04373)	2	0.004	0.012
80	5-Hydroxytryptamine degredation (P04372)	1	0.002	0.006
Table S4e: Results of 904 DEGs (down-regulated in normal mice in NM vs AM comparison) in Reactome pathway analysis
TermID	TermGeneNum	ObservedGeneNum	ExpectedGeneNum	RichFactor	rawP	adjP	TermName	GeneList
R-MMU-2299718	77	29	2.46829	11.749	6.22941e-24	2.08062e-21	Condensation_of_Prophase_Chromosomes	Ccnb1;H2bc7;H4c1;H3c8;H2ac13;H2ax;H3c3;H3c11;H4c6;H3c10;H2ac4;H3c4;H2ac15;H2bc11;H2ac18;H4c11;H3c1;H2bc13;H4c12;Cdk1;H4f16;H2bc12;H2bc9;H2bu2;H2ac10;H2ac8;H3c15;H3c7;H2ac7;
R-MMU-8936459	83	28	2.56594	10.9122	1.32206e-21	2.20784e-19	RUNX1_regulates_genes_involved_in_megakaryocyte_differentiation_and_platelet_function	H2bu2;H2bc9;H2ac7;H3c7;H3c15;H2ac10;H2ac8;H3c1;H4c11;H2bc12;H4f16;H4c12;Gata1;H2bc13;H4c6;H3c11;H2ac15;H2bc11;H2ac18;H3c4;H2ac4;H3c10;H2bc7;H3c3;H2ax;H3c8;H2ac13;H4c1;
R-MMU-212300	79	27	2.37919	11.3484	4.84587e-21	5.39507e-19	PRC2_methylates_histones_and_DNA	H2bc13;H4c12;H4f16;H2bc12;H4c11;H3c1;H2ac10;H2ac8;H3c15;H3c7;H2ac7;H2bc9;H2bu2;H4c1;H2ac13;H3c8;H2ax;H3c3;H2bc7;H2ac4;H3c10;H3c4;H2bc11;H2ac15;H2ac18;H3c11;H4c6;
R-MMU-3214815	89	28	2.85296	9.81438	1.16232e-20	9.70541e-19	HDACs_deacetylate_histones	H2bc7;H3c3;H4c1;H3c8;H2ac13;H3c11;H4c6;H2ac18;H2bc11;H2ac15;H2aw;H3c4;H3c10;H2ac4;H3c1;H4c11;H4f16;H2bc12;H4c12;H2bc13;H2bu2;H2bc9;H2ac7;H3c7;H3c15;H2ac8;H2ac10;H2bc14;
R-MMU-110330	63	24	1.32238	18.1491	4.05557e-20	2.70912e-18	Recognition_and_association_of_DNA_glycosylase_with_site_containing_an_affected_purine	H2bc9;H3c11;H2bu2;H4c6;H2ac10;H2ac8;H3c10;H2ac4;Neil3;H2ac18;H2ac15;H2bc11;H2ac7;H4c11;H2bc7;H3c1;H2bc13;H4c1;H3c8;H2ac13;H4c12;H2ax;H4f16;H2bc12;
R-MMU-110331	65	24	1.79443	13.3747	9.70248e-20	4.62947e-18	Cleavage_of_the_damaged_purine	H4c6;H3c11;H2bc11;H2ac15;H2ac18;H3c10;H2ac4;H2bc7;H2ax;H2ac13;H3c8;H4c1;H2bc9;H2bu2;H2ac7;H2ac10;H2ac8;Neil3;H3c1;H4c11;H2bc12;H4f16;H2bc13;H4c12;
R-MMU-73927	65	24	2.04654	11.7271	9.70248e-20	4.62947e-18	Depurination	H2ac10;H2ac8;Neil3;H2ac7;H2bc9;H2bu2;H2bc13;H4c12;H2bc12;H4f16;H4c11;H3c1;H2ac4;H3c10;H2ac18;H2ac15;H2bc11;H4c6;H3c11;H3c8;H2ac13;H4c1;H2ax;H2bc7;
R-MMU-73929	72	24	2.22587	10.7823	1.58154e-18	6.60294e-17	Base-Excision_Repair,_AP_Site_Formation	H4f16;H2bc12;H4c12;H2bc13;H3c1;H4c11;H2ac7;Neil3;H2ac8;H2ac10;H2bu2;H2bc9;H2ax;H4c1;H3c8;H2ac13;H2bc7;H2ac18;H2bc11;H2ac15;H3c10;H2ac4;H3c11;H4c6;
R-MMU-9670095	65	23	2.03171	11.3205	1.78579e-18	6.62726e-17	Inhibition_of_DNA_recombination_at_telomere	H4f16;H2bc12;H4c12;H2bc13;H3c1;H4c11;H2ac7;H2ac10;H2ac8;H2bu2;H2bc9;H2ax;H4c1;H3c8;H2ac13;H2bc7;H2bc11;H2ac15;H2ac18;H3c10;H2ac4;H3c11;H4c6;
R-MMU-606279	78	24	1.53046	15.6816	1.31942e-17	4.00624e-16	Deposition_of_new_CENPA-containing_nucleosomes_at_the_centromere	H4c1;Cenps;Cenpp;H2ac13;H2ax;Cenph;H2bc7;Oip5;H2ac4;H2bc11;H2ac15;H2ac18;H4c6;H2bc13;H4c12;H4f16;H2bc12;H4c11;H2ac8;H2ac10;H2ac7;H2bc9;Cenpk;H2bu2;
R-MMU-774815	78	24	2.54483	9.43088	1.31942e-17	4.00624e-16	Nucleosome_assembly	H2ac8;H2ac10;H2ac7;Cenpk;H2bu2;H2bc9;H4c12;H2bc13;H2bc12;H4f16;H4c11;Oip5;H2ac4;H2ac18;H2bc11;H2ac15;H4c6;H2ac13;Cenpp;Cenps;H4c1;H2ax;H2bc7;Cenph;
R-MMU-68875	135	30	3.55749	8.4329	2.50535e-17	6.97323e-16	Mitotic_Prophase	H2ac10;H3c7;H2bc9;H2bu2;Cdk1;H2bc13;H4c11;H2ac15;H4c6;Lmna;H2ax;Ccnb1;H2ac7;H2ac8;H3c15;H2bc12;H4f16;H4c12;H3c1;H3c4;H2ac18;H2bc11;H2ac4;H3c10;H3c11;H3c3;H2ac13;H3c8;H4c1;H2bc7;
R-MMU-2559586	89	25	2.85296	8.76284	3.14135e-17	8.07086e-16	DNA_Damage/Telomere_Stress_Induced_Senescence	H2bc13;H4c12;Ccna2;H2bc12;H4f16;H4c11;H3c1;H2ac8;H2ac10;H2ac7;H2bc9;H2bu2;H3c8;H2ac13;H4c1;H2ax;H2bc7;H1f5;H3c10;H2ac4;H2ac15;H2bc11;H2ac18;H4c6;H3c11;
R-MMU-212165	109	27	2.88478	9.35946	5.53756e-17	1.3211e-15	Epigenetic_regulation_of_gene_expression	H2bc9;H2bu2;H2ac7;H2ac8;H2ac10;H3c15;H3c7;H3c1;H4c11;H2bc12;H4f16;H2bc13;H4c12;H4c6;H3c11;H3c4;H2bc11;H2ac15;H2ac18;H3c10;H2ac4;H2bc7;H2ax;H3c3;H3c8;H2ac13;H4c1;
R-MMU-73886	130	29	3.12914	9.26774	7.85319e-17	1.74864e-15	Chromosome_Maintenance	H2bu2;H2bc9;H2ac10;H4c11;Ccna2;H2bc13;H4c6;H2ac15;Cenph;H2ax;Cenpk;H2ac7;H2ac8;H3c1;H4f16;H2bc12;H4c12;H3c11;H2bc11;H2ac18;Oip5;H2ac4;H3c10;H2bc7;H4c1;Cenps;Cenpp;H2ac13;H3c8;
R-MMU-73884	93	24	2.98118	8.05051	1.17155e-15	2.4456e-14	Base_Excision_Repair	H2bc7;H3c8;H2ac13;H4c1;H2ax;H4c6;H3c11;H3c10;H2ac4;H2ac18;H2bc11;H2ac15;H4c11;H3c1;H4c12;H2bc13;H2bc12;H4f16;H2bu2;H2bc9;Neil3;H2ac10;H2ac8;H2ac7;
R-MMU-3214858	71	21	2.15446	9.74722	3.70369e-15	7.27666e-14	RMTs_methylate_histone_arginines	H2ac4;H3c10;H2ac18;H2ac15;H2aw;H3c4;H3c11;H4c6;H4c1;H3c8;H2ac13;H3c3;H3c7;H2ac10;H3c15;H2ac8;H2ac7;H4c12;H4f16;H4c11;H3c1;
R-MMU-157579	104	24	3.15583	7.60497	1.8064e-14	3.35187e-13	Telomere_Maintenance	H2bc11;H2ac15;H2ac18;H2ac4;H3c10;H4c6;H3c11;H2ax;H2ac13;H3c8;H4c1;H2bc7;H2ac7;H2ac8;H2ac10;H2bc9;H2bu2;H2bc12;H4f16;H2bc13;Ccna2;H4c12;H3c1;H4c11;
R-MMU-3214847	72	20	2.25873	8.85454	6.53394e-14	1.1486e-12	HATs_acetylate_histones	H3c10;H2bc11;H3c4;H3c11;H4c6;H4c1;H3c8;H3c3;H2bc7;H3c7;H3c15;H2bc14;H2bu2;H2bc9;H4c12;H2bc13;H4f16;H2bc12;H4c11;H3c1;
R-MMU-68886	399	44	12.4716	3.52802	5.78679e-13	9.66394e-12	M_Phase	H3c3;H2ac13;Cenpp;H2bc7;H3c4;H3c11;H2bc12;Nuf2;H3c1;Ube2c;H3c15;Ccnb1;Ninl;Lmna;Cdk1;H4c11;H2ac10;H3c7;Cdc20;Cenpf;H2bu2;Cenps;H4c1;H3c8;Prkar2b;H2ac18;H2bc11;H2ac4;H3c10;Spc25;H4f16;Cdca8;H4c12;H2ac7;H2ac8;Cenpk;H2ax;Cenph;H2ac15;Kntc1;H4c6;H2bc13;Birc5;H2bc9;
R-MMU-69278	515	50	15.6274	3.1995	1.723e-12	2.74039e-11	Cell_Cycle,_Mitotic	H2bu2;H3c7;Cdc20;H2ac10;Cdk1;Lmna;E2f2;H3c1;Nuf2;Ube2c;Cdc6;H3c11;H3c4;H2bc7;H3c3;Cenpp;H2bc9;Birc5;Ccna2;H4c6;H2ac15;Kntc1;Cenph;H2ac7;H2ac8;Cdca8;H4f16;H3c10;H2ac4;Prkar2b;Cenps;H3c8;Cenpf;Esco2;H4c11;Ninl;Ccnb1;Gtse1;H3c15;H2bc12;H2ac13;H2bc13;H2ax;Hmmr;Cenpk;H4c12;Spc25;H2ac18;H2bc11;H4c1;
R-MMU-2559583	153	26	2.91478	8.92004	2.93715e-12	4.45913e-11	Cellular_Senescence	H3c11;H2ac4;H3c10;H2ac18;H2bc11;H2bc7;H3c8;H2ac13;H4c1;H2ac8;H2ac7;Ube2c;H3c1;H4c12;H2bc12;H4f16;H4c6;H2ac15;H1f5;H2ax;H2bc9;H2bu2;H2ac10;H4c11;H2bc13;Ccna2;
R-MMU-8878171	204	29	5.81793	4.98459	1.56216e-11	2.26853e-10	Transcriptional_regulation_by_RUNX1	H2ac7;H3c15;H2ac8;H4f16;H2bc12;H4c12;H3c1;H3c4;H2ac18;H2bc11;H3c10;H2ac4;H3c11;H3c3;H4c1;H2ac13;H3c8;H2bc7;H2ac10;H3c7;H2bc9;H2bu2;H2bc13;Gata1;H4c11;H2ac15;Tal1;H4c6;H2ax;
R-MMU-69620	281	34	6.69963	5.0749	2.51982e-11	3.50674e-10	Cell_Cycle_Checkpoints	Gtse1;Ube2c;Clspn;H3c1;Nuf2;H2bc12;H3c11;Cdc6;H2bc7;Cenpp;H2bu2;Cenpf;Cdc20;H4c11;Cdk1;Ccnb1;Cenpk;H4c12;Cdca8;H4f16;Spc25;H3c10;H2bc11;H4c1;Cenps;H3c8;H2bc9;Birc5;Ccna2;H2bc13;H4c6;Kntc1;Cenph;H2ax;
R-MMU-1640170	597	52	19.4778	2.66971	3.75129e-11	5.01172e-10	Cell_Cycle	H2ac13;Clspn;H2bc12;Gtse1;H3c15;Ccnb1;Ninl;H4c11;Cenpf;Esco2;H4c1;Spc25;H2bc11;H2ac18;H4c12;Cenpk;H2ax;Hmmr;H2bc13;H2bc7;H3c3;Cenpp;Cdc6;H3c11;H3c4;Oip5;Nuf2;H3c1;Ube2c;Lmna;E2f2;Cdk1;H2bu2;H2ac10;Cdc20;H3c7;Prkar2b;H3c8;Cenps;H3c10;H2ac4;H4f16;Cdca8;H2ac7;H2ac8;Cenph;H4c6;H2ac15;Kntc1;Ccna2;H2bc9;Birc5;
R-MMU-9018519	90	19	2.68994	7.06336	5.61853e-11	7.21765e-10	Estrogen-dependent_gene_expression	H3c10;H3c4;H2bc11;H3c11;H4c6;H4c1;H3c8;H3c3;H2bc7;H3c15;H3c7;H2bc9;H2bu2;H2bc13;H4c12;H4f16;H2bc12;H4c11;H3c1;
R-MMU-5693571	61	16	1.57963	10.129	5.86795e-11	7.25887e-10	Nonhomologous_End-Joining_(NHEJ)	H4c12;H4c1;H2bc13;H3c8;H4f16;H2ax;H2bc12;H2bc7;H4c11;H3c1;H3c10;H2bc11;H2bu2;H3c11;H4c6;H2bc9;
R-MMU-4839726	202	28	6.36003	4.4025	6.59709e-11	7.59802e-10	Chromatin_organization	H2aw;H2ac15;H4c6;H2ac10;H3c7;H2bc9;H2bu2;H2bc13;H4c11;H3c4;H2bc11;H2ac18;H3c10;H2ac4;H3c11;H3c3;H4c1;H3c8;H2ac13;H2bc7;H2ac7;H3c15;H2ac8;H2bc14;H4f16;H2bc12;H4c12;H3c1;
R-MMU-3247509	202	28	6.47525	4.32416	6.59709e-11	7.59802e-10	Chromatin_modifying_enzymes	H3c10;H2ac4;H2ac18;H2bc11;H3c4;H3c11;H4c1;H2ac13;H3c8;H3c3;H2bc7;H3c15;H2ac8;H2bc14;H2ac7;H4c12;H4f16;H2bc12;H3c1;H2ac15;H2aw;H4c6;H3c7;H2ac10;H2bu2;H2bc9;H2bc13;H4c11;
R-MMU-5693607	87	18	2.6499	6.79272	2.60328e-10	2.89832e-09	Processing_of_DNA_double-strand_break_ends	H3c11;H4c6;H2bc11;H3c10;H2bc7;H2ax;H4c1;H3c8;H2bu2;H2bc9;H3c1;Clspn;H4c11;H4f16;H2bc12;Ccna2;H4c12;H2bc13;
R-MMU-1247673	8	7	0.247319	28.3035	2.84887e-10	3.06943e-09	Erythrocytes_take_up_oxygen_and_release_carbon_dioxide	Car2;Car1;Aqp1;Rhag;Slc4a1;Hbb-bs;Hbb-bt;
R-MMU-69473	90	18	2.88501	6.23915	4.69387e-10	4.89922e-09	G2/M_DNA_damage_checkpoint	Cdk1;H4f16;H2bc12;H2bc13;H4c12;H3c1;H4c11;H2bc9;H2bu2;H2ax;H4c1;H3c8;Ccnb1;H2bc7;H2bc11;H3c10;H3c11;H4c6;
R-MMU-3214842	45	13	1.1653	11.1559	1.03577e-09	1.04832e-08	HDMs_demethylate_histones	H3c8;H4c1;H4c12;H4f16;H3c3;H4c11;H3c1;H3c15;H3c7;H3c10;H3c4;H4c6;H3c11;
R-MMU-5693565	73	16	2.22348	7.19594	1.07107e-09	1.05217e-08	Recruitment_and_ATM-mediated_phosphorylation_of_repair_and_signaling_proteins_at_DNA_double_strand_breaks	H2bc7;H2ax;H4c1;H3c8;H3c11;H4c6;H2bc11;H3c10;H3c1;H4c11;H4f16;H2bc12;H4c12;H2bc13;H2bu2;H2bc9;
R-MMU-189451	13	8	0.034109	234.542	1.30158e-09	1.23103e-08	Heme_biosynthesis	Hmbs;Ppox;Alad;Cpox;Uros;Alas2;Abcg2;Urod;
R-MMU-5693606	74	16	1.78964	8.94034	1.32686e-09	1.23103e-08	DNA_Double_Strand_Break_Response	H2bu2;H2bc9;H4f16;H2bc12;H4c12;H2bc13;H3c1;H4c11;H2bc11;H3c10;H3c11;H4c6;H2ax;H4c1;H3c8;H2bc7;
R-MMU-1237044	12	7	0.33128	21.1302	2.51911e-08	2.21417e-07	Erythrocytes_take_up_carbon_dioxide_and_release_oxygen	Rhag;Aqp1;Car2;Car1;Hbb-bs;Slc4a1;Hbb-bt;
R-MMU-1480926	12	7	0.384668	18.1975	2.51911e-08	2.21417e-07	O2/CO2_exchange_in_erythrocytes	Slc4a1;Hbb-bs;Hbb-bt;Car1;Car2;Aqp1;Rhag;
R-MMU-8939211	159	21	5.09685	4.12019	4.22244e-08	3.61614e-07	ESR-mediated_signaling	H3c11;H3c4;H2bc11;H3c10;H2bc7;H3c3;H3c8;H4c1;H3c15;H3c1;H2bc12;H4f16;H4c12;Sphk1;H4c6;H2bc9;Hbegf;H2bu2;H3c7;H4c11;H2bc13;
R-MMU-5693567	120	18	3.84668	4.67936	5.55759e-08	4.64059e-07	HDR_through_Homologous_Recombination_(HRR)_or_Single_Strand_Annealing_(SSA)	H3c11;H4c6;H3c10;H2bc11;H2bc7;H4c1;H3c8;H2ax;H2bu2;H2bc9;H4c11;Clspn;H3c1;Ccna2;H4c12;H2bc13;H4f16;H2bc12;
R-MMU-69481	162	21	5.19302	4.04389	5.87809e-08	4.78849e-07	G2/M_Checkpoints	H4c11;Cdk1;H2bc13;H2bc9;H2bu2;Ccnb1;H2ax;H4c6;H3c1;Clspn;H4f16;H2bc12;H4c12;Gtse1;H2bc7;H4c1;H3c8;H3c11;Cdc6;H2bc11;H3c10;
R-MMU-3214841	62	13	1.20945	10.7487	7.16068e-08	5.69445e-07	PKMTs_methylate_histone_lysines	H3c11;H4c6;H3c15;H3c10;H3c7;H3c4;H4c11;H3c1;H4c1;H3c8;H4c12;H4f16;H3c3;
R-MMU-5693538	123	18	2.5397	7.08745	8.21225e-08	6.37882e-07	Homology_Directed_Repair	H3c8;H4c1;H2ax;H2bc7;H3c10;H2bc11;H4c6;H3c11;H2bc13;Ccna2;H4c12;H2bc12;H4f16;Clspn;H4c11;H3c1;H2bc9;H2bu2;
R-MMU-73894	307	28	9.84109	2.84521	7.43858e-07	5.64656e-06	DNA_Repair	Clspn;H3c1;H2bc12;Neil3;H2bc7;H2ac13;H3c11;H4c11;H2bu2;H2ac10;Ube2l6;H4c12;H4f16;H2ac8;H2ac7;H3c8;H4c1;Cenps;H3c10;H2ac4;H2bc11;H2ac18;Ccna2;H2bc13;H2bc9;H2ax;H4c6;H2ac15;
R-MMU-1266695	25	8	0.787132	10.1635	7.76638e-07	5.76438e-06	Interleukin-7_signaling	H3c11;H3c1;H3c8;H3c15;H3c7;H3c10;H3c4;H3c3;
R-MMU-9006931	208	22	6.2642	3.51202	1.04728e-06	7.60414e-06	Signaling_by_Nuclear_Receptors	Aldh1a1;Sphk1;H4c6;H2bc13;H4c11;H3c7;H2bc9;Hbegf;H2bu2;H3c3;H3c8;H4c1;H2bc7;H3c4;H2bc11;H3c10;H3c11;H2bc12;H4f16;H4c12;H3c1;H3c15;
R-MMU-189445	26	8	0.833447	9.59869	1.09031e-06	7.74813e-06	Metabolism_of_porphyrins	Ppox;Abcg2;Alas2;Hmbs;Alad;Cpox;Uros;Urod;
R-MMU-5693532	149	18	4.7763	3.76861	1.52743e-06	1.06284e-05	DNA_Double-Strand_Break_Repair	H2bc12;H4f16;H4c12;H3c1;Clspn;H2bc11;H3c10;H3c11;H3c8;H4c1;H2bc7;H2bc9;H2bu2;H2bc13;Ccna2;H4c11;H4c6;H2ax;
R-MMU-983231	120	15	3.84668	3.89947	7.58073e-06	5.16727e-05	Factors_involved_in_megakaryocyte_development_and_platelet_production	H3c7;H3c15;Sh2b2;Kif18b;Gata1;Kifc5b;H3c1;H3c10;Kif4;H3c4;H3c11;H3c8;H3c3;Prkar2b;Nfe2;
R-MMU-2262752	418	31	9.53685	3.25055	1.53021e-05	0.000102218	Cellular_responses_to_stress	H4f16;H4c12;H2ac7;H2ac8;H4c1;H3c8;Atp6v0e2;H2bc11;H2ac18;H2ac4;H3c10;Ccna2;H2bc13;H2bc9;H2ax;H4c6;H2ac15;H3c1;Ube2c;H2bc12;Prdx2;Bag2;Dnaja4;H2bc7;H2ac13;H3c11;H4c11;H2bu2;H2ac10;H1f5;Txnrd2;
R-MMU-5689901	36	8	1.154	6.93239	1.58914e-05	0.000104073	Metalloprotease_DUBs	H2ac4;H2ac10;H2ac8;H2ac15;H2ac7;H2ac18;H2aw;H2ac13;
R-MMU-8953854	546	3	7.47433	0.401374	1.75813e-05	0.000112926	Metabolism_of_RNA	Gspt2;Nxf7;Magohb;
R-MMU-8953897	420	31	13.1759	2.35278	2.60605e-05	0.00016423	Cellular_responses_to_external_stimuli	Ccna2;H2bc13;H2bc9;H2ax;H4c6;H2ac15;H4c12;H4f16;H2ac8;H2ac7;H3c8;H4c1;Atp6v0e2;H3c10;H2ac4;H2bc11;H2ac18;H4c11;H2bu2;H2ac10;H1f5;Txnrd2;Ube2c;H3c1;H2bc12;Dnaja4;Prdx2;Bag2;H2bc7;H2ac13;H3c11;
R-MMU-418555	477	2	8.43429	0.237127	2.67e-05	0.000165144	G_alpha_(s)_signalling_events	Olfr145;Olfr420;
R-MMU-382551	651	40	21.2396	1.88328	8.12805e-05	0.000493594	Transport_of_small_molecules	Abca4;Aqp4;Tfr2;Car1;Atp9a;Add2;Slc38a5;Slc22a4;Ano3;Slc14a1;Prkar2b;Slc4a1;Fxyd4;Atp6v0e2;Hbb-bs;Hbb-bt;Slc26a3;Aqp9;Rhag;Pln;Clcn2;Slc6a9;Trpv5;Abcg4;Aqp1;Dmtn;Slc43a1;Tfrc;Atp7b;Atp1b2;Abcb6;Atp2b4;Slc30a10;Steap3;Abcg2;Abcb4;Nipa1;Car2;Slc16a10;Lcn2;
R-MMU-2500257	117	13	3.56365	3.64794	0.000106936	0.000637798	Resolution_of_Sister_Chromatid_Cohesion	Cenpp;Cenps;Cenph;Ccnb1;Kntc1;Spc25;Cdk1;Cdca8;Nuf2;Cdc20;Birc5;Cenpk;Cenpf;
R-MMU-6799990	4	3	0.083048	36.1237	0.000134179	0.000786242	Metal_sequestration_by_antimicrobial_proteins	Lcn2;S100a9;S100a8;
R-MMU-141444	90	11	1.48871	7.38897	0.000154601	0.000875201	Amplification__of_signal_from_unattached__kinetochores_via_a_MAD2__inhibitory_signal	Cenpp;Cenps;Cenph;Kntc1;Spc25;Cdca8;Nuf2;Birc5;Cdc20;Cenpf;Cenpk;
R-MMU-141424	90	11	2.88501	3.81281	0.000154601	0.000875201	Amplification_of_signal_from_the_kinetochores	Birc5;Cdc20;Cenpf;Cenpk;Cdca8;Nuf2;Kntc1;Spc25;Cenps;Cenpp;Cenph;
R-MMU-69618	107	12	3.42996	3.49859	0.000179752	0.00100062	Mitotic_Spindle_Checkpoint	Cdca8;Nuf2;Ube2c;Birc5;Cdc20;Cenpf;Cenpk;Cenps;Cenpp;Cenph;Kntc1;Spc25;
R-MMU-212436	830	47	18.7474	2.50701	0.000183819	0.00100648	Generic_Transcription_Pathway	H3c15;Zfp457;H2bc12;H2ac13;H4c11;Zfp69;Gata1;Ccnb1;Cited4;Rorc;H4c12;H2ac18;H2bc11;Zfp612;Steap3;H4c1;E2f8;H2bc13;E2f7;H2ax;Prdx2;H3c1;H3c11;H3c4;H2bc7;H3c3;H2bu2;H2ac10;H3c7;Zfp600;Gm14322;Cdk1;Gadd45a;Zfp811;H2ac7;H2ac8;H4f16;H2ac4;H3c10;Pidd1;H3c8;H2bc9;Nr0b2;Ccna2;H4c6;H2ac15;Tal1;
R-MMU-176417	6	3	0.002053	1461.28	0.000638864	0.00344162	Phosphorylation_of_Emi1	Cdk1;Ccnb1;Cdc20;
R-MMU-9648025	106	11	3.28907	3.34441	0.0006512	0.00345239	EML4_and_NUDC_in_mitotic_spindle_formation	Spc25;Kntc1;Cenph;Cenpp;Cenps;Cenpf;Cenpk;Birc5;Cdc20;Nuf2;Cdca8;
R-MMU-6791312	34	6	1.08989	5.50513	0.000712004	0.00371577	TP53_Regulates_Transcription_of_Cell_Cycle_Genes	E2f8;Cdk1;Ccna2;E2f7;Gadd45a;Ccnb1;
R-MMU-445095	7	3	0.220397	13.6118	0.00109106	0.00552143	Interaction_between_L1_and_Ankyrins	Sptbn2;Spta1;Ank1;
R-MMU-6804114	7	3	0.22439	13.3696	0.00109106	0.00552143	TP53_Regulates_Transcription_of_Genes_Involved_in_G2_Cell_Cycle_Arrest	Cdk1;Gadd45a;Ccnb1;
R-MMU-5663220	131	12	3.97513	3.01877	0.00114856	0.00566569	RHO_GTPases_Activate_Formins	Diaph3;Spc25;Cenps;Cenpp;Cenpk;Cdca8;Nuf2;Kntc1;Cenph;Birc5;Cdc20;Cenpf;
R-MMU-381753	360	2	10.9651	0.182397	0.00115349	0.00566569	Olfactory_Signaling_Pathway	Olfr420;Olfr145;
R-MMU-68877	188	15	6.02647	2.48902	0.00122247	0.00591748	Mitotic_Prometaphase	Ccnb1;Cenph;Kntc1;Ninl;Cdk1;Cdc20;Birc5;Cenpf;Cenps;Cenpp;Prkar2b;Spc25;Cdca8;Nuf2;Cenpk;
R-MMU-73857	948	48	22.8186	2.10355	0.00182852	0.00872464	RNA_Polymerase_II_Transcription	Zfp811;Gadd45a;Cdk1;Gm14322;Magohb;Zfp600;H3c7;H2ac10;H2bu2;H3c3;H2bc7;H3c4;H3c11;H3c1;Prdx2;Tal1;H2ac15;H4c6;Ccna2;Nr0b2;H2bc9;H3c8;Pidd1;H2ac4;H3c10;H4f16;H2ac8;H2ac7;Ccnb1;Gata1;H4c11;Zfp69;H2ac13;H2bc12;Zfp457;H3c15;H2ax;E2f7;H2bc13;E2f8;H4c1;Zfp612;Steap3;H2ac18;H2bc11;Rorc;H4c12;Cited4;
R-MMU-176408	29	5	0.52601	9.50552	0.0022269	0.0104758	Regulation_of_APC/C_activators_between_G1/S_and_early_anaphase	Cdk1;Cdc20;Ccna2;Ube2c;Ccnb1;
R-MMU-195258	239	17	4.66222	3.64633	0.00240382	0.0111511	RHO_GTPase_Effectors	S100a8;Kntc1;Cenph;Cenpf;Cdc20;Birc5;Spc25;Diaph3;Kif14;S100a9;Cit;Cenpp;Cenps;Cenpk;Myh10;Nuf2;Cdca8;
R-MMU-6804116	10	3	0.232717	12.8912	0.00347754	0.0159109	TP53_Regulates_Transcription_of_Genes_Involved_in_G1_Cell_Cycle_Arrest	Ccna2;E2f7;E2f8;
R-MMU-432047	11	3	0.279831	10.7208	0.00466709	0.021065	Passive_transport_by_Aquaporins	Aqp4;Aqp9;Aqp1;
R-MMU-68882	219	15	6.89528	2.1754	0.00595523	0.0261975	Mitotic_Anaphase	Cenpk;Cdca8;Ube2c;Nuf2;Spc25;Cenps;Cenpp;Cdc20;Birc5;Cenpf;Cdk1;Kntc1;Lmna;Cenph;Ccnb1;
R-MMU-194315	366	22	11.7324	1.87515	0.00596112	0.0261975	Signaling_by_Rho_GTPases	Cenps;Cit;S100a9;Spc25;Arhgef16;Cdca8;Itsn1;Cenpk;Cenph;Kntc1;S100a8;Birc5;Cenpp;Kif14;Diaph3;Depdc1b;Nuf2;Myh10;Arhgap33;Cdc20;Arhgef37;Cenpf;
R-MMU-75205	12	3	0.384668	7.79893	0.006074	0.0263469	Dissolution_of_Fibrin_Clot	Plat;Serpinf2;Serpine2;
R-MMU-2555396	220	15	6.70089	2.23851	0.00615964	0.0263759	Mitotic_Metaphase_and_Anaphase	Cenpk;Cdca8;Ube2c;Nuf2;Spc25;Cenps;Cenpp;Cdc20;Birc5;Cenpf;Cdk1;Kntc1;Lmna;Ccnb1;Cenph;
R-MMU-174048	24	4	0.616016	6.49334	0.00703868	0.0297585	APC/C:Cdc20_mediated_degradation_of_Cyclin_B	Ccnb1;Ube2c;Cdc20;Cdk1;
R-MMU-936837	53	6	1.72918	3.46985	0.00724845	0.0302623	Ion_transport_by_P-type_ATPases	Atp9a;Fxyd4;Pln;Atp2b4;Atp7b;Atp1b2;
R-MMU-8948216	39	5	1.18344	4.22499	0.00828314	0.0341552	Collagen_chain_trimerization	Col14a1;Col11a1;Col12a1;Col19a1;Col6a2;
R-MMU-917937	56	6	1.79512	3.3424	0.0094536	0.0385061	Iron_uptake_and_transport	Tfrc;Lcn2;Atp6v0e2;Tfr2;Abcg2;Steap3;
R-MMU-4419969	14	3	0.421629	7.11526	0.00957602	0.0385348	Depolymerisation_of_the_Nuclear_Lamina	Cdk1;Lmna;Ccnb1;
R-MMU-2980767	5	2	0.068446	29.2201	0.00993755	0.0390487	Activation_of_NIMA_Kinases_NEK9,_NEK6,_NEK7	Ccnb1;Cdk1;
R-MMU-69478	5	2	0.082706	24.182	0.00993755	0.0390487	G2/M_DNA_replication_checkpoint	Ccnb1;Cdk1;
R-MMU-5689603	94	8	2.41273	3.31575	0.0114624	0.0445169	UCH_proteinases	H2ac7;H2ac10;H2ac8;H2ac13;H2ac15;H2ac18;H2aw;H2ac4;
R-MMU-74160	1046	48	33.0529	1.45222	0.0154399	0.0592751	Gene_expression_(Transcription)	H4f16;H3c10;H3c8;H2bc9;H2ac15;H4c6;Prdx2;H3c4;H3c11;H3c3;H2bc7;H3c7;H2bu2;Magohb;Zfp811;Cited4;H2bc11;H4c1;Steap3;H2bc13;H2ax;H4c11;Zfp69;Ccnb1;H2ac8;H2ac7;H2ac4;Pidd1;Ccna2;Nr0b2;Tal1;H3c1;H2ac10;Gadd45a;Cdk1;Gm14322;Zfp600;Rorc;H4c12;H2ac18;Zfp612;E2f7;E2f8;Zfp457;H3c15;H2bc12;H2ac13;Gata1;
R-MMU-917977	31	4	0.887634	4.50636	0.0174442	0.0662085	Transferrin_endocytosis_and_recycling	Tfrc;Steap3;Atp6v0e2;Tfr2;
R-MMU-75153	47	5	1.41547	3.5324	0.0178821	0.0671081	Apoptotic_execution_phase	H1f5;Clspn;Dsg1a;Dsg3;Lmna;
R-MMU-2467813	182	12	5.93794	2.0209	0.0181697	0.06743	Separation_of_Sister_Chromatids	Cenpk;Ube2c;Nuf2;Cdca8;Spc25;Cenps;Cenpp;Cenpf;Cdc20;Birc5;Kntc1;Cenph;
R-MMU-2995383	18	3	0.051335	58.4397	0.0195008	0.0707964	Initiation_of_Nuclear_Envelope_(NE)_Reformation	Cdk1;Ccnb1;Lmna;
R-MMU-109582	504	26	16.0986	1.61505	0.0192945	0.0707964	Hemostasis	Serpinf2;H3c8;Plat;Prkar2b;H3c10;Cd177;Rab27b;Kifc5b;Atp2b4;P2ry1;Nfe2;Serpine2;H3c3;F2r;Kif4;H3c4;H3c11;H3c1;H3c15;Kif18b;Sh2b2;Fn1;Atp1b2;Prkcg;Gata1;H3c7;
R-MMU-1474244	270	16	7.3614	2.1735	0.0214095	0.0768901	Extracellular_matrix_organization	Fn1;Col14a1;Col19a1;Icam4;Mfap2;Col12a1;Col11a1;Loxl2;Ctsg;Tnr;Spock3;Elane;Klk1;Emilin2;Tnn;Col6a2;
R-MMU-375165	34	4	1.03559	3.86253	0.0238336	0.0846854	NCAM_signaling_for_neurite_out-growth	Col6a2;Sptbn2;Spta1;Ncam1;
R-MMU-5625900	8	2	0.024641	81.1655	0.0260791	0.0903491	RHO_GTPases_activate_CIT	Kif14;Cit;
R-MMU-176412	20	3	0.581793	5.15647	0.0259727	0.0903491	Phosphorylation_of_the_APC/C	Ccnb1;Ube2c;Cdk1;
R-MMU-111465	35	4	1.05407	3.7948	0.0262391	0.0903491	Apoptotic_cleavage_of_cellular_proteins	Clspn;Lmna;Dsg1a;Dsg3;
R-MMU-8866654	53	5	1.22736	4.0738	0.0286011	0.0974772	E3_ubiquitin_ligases_ubiquitinate_target_proteins	H2bc7;H2bc12;H2bc13;H2bc9;H2bc11;
R-MMU-388396	993	21	32.3977	0.648195	0.0289258	0.0975881	GPCR_downstream_signalling	Hbegf;Grm8;Arhgef37;Rgs17;Prokr1;Prkcg;Olfr145;F2r;Cnga1;Aplnr;Tac2;Itsn1;P2ry1;Gpsm2;Rbp4;Arhgef16;Prkar2b;Htr2a;Olfr420;Abca4;Adcy8;
R-MMU-140875	21	3	0.347365	8.63645	0.029588	0.0978455	Common_Pathway_of_Fibrin_Clot_Formation	Cd177;F2r;Serpine2;
R-MMU-2168880	21	3	0.539014	5.56572	0.029588	0.0978455	Scavenging_of_heme_from_plasma	Hbb-bs;Cd163;Hbb-bt;
R-MMU-372790	1024	22	15.3028	1.43765	0.0311619	0.101076	Signaling_by_GPCR	Htr2a;Olfr420;Abca4;Cnga1;Aplnr;Gpsm2;Itsn1;Arhgef16;Arhgef37;Rgs17;Olfr145;Prkcg;Kel;F2r;Adcy8;Tac2;P2ry1;Rbp4;Prkar2b;Prokr1;Hbegf;Grm8;
R-MMU-8852135	73	6	2.29843	2.61048	0.0314218	0.101076	Protein_ubiquitination	H2bc11;H2bc7;H2bc9;Ube2c;H2bc13;H2bc12;
R-MMU-445717	37	4	1.18606	3.37251	0.0314729	0.101076	Aquaporin-mediated_transport	Aqp9;Prkar2b;Aqp1;Aqp4;
R-MMU-69273	22	3	0.456765	6.56793	0.0334546	0.106417	Cyclin_A/B1/B2_associated_events_during_G2/M_transition	Ccnb1;Ccna2;Cdk1;
R-MMU-1257604	226	2	7.24458	0.276068	0.0356859	0.111394	PIP3_activates_AKT_signaling	Il1rl1;Hbegf;
R-MMU-72203	226	2	7.37349	0.271242	0.0356859	0.111394	Processing_of_Capped_Intron-Containing_Pre-mRNA	Nxf7;Magohb;
R-MMU-198933	97	7	1.29466	5.40682	0.0388576	0.120171	Immunoregulatory_interactions_between_a_Lymphoid_and_a_non-Lymphoid_cell	Cd300ld4;Cd300e;Cd300ld5;H2-Q1;Cd300ld3;Pianp;Icam4;
R-MMU-68689	10	2	0.326261	6.13006	0.0401526	0.123037	CDC6_association_with_the_ORC:origin_complex	Cdc6;E2f2;
R-MMU-1650814	59	5	1.79033	2.79279	0.0426982	0.129647	Collagen_biosynthesis_and_modifying_enzymes	Col14a1;Col11a1;Col12a1;Col19a1;Col6a2;
R-MMU-1474228	137	9	4.1572	2.16492	0.0452926	0.136286	Degradation_of_the_extracellular_matrix	Klk1;Col11a1;Col12a1;Elane;Spock3;Col19a1;Fn1;Col6a2;Ctsg;
R-MMU-111997	25	3	0.373603	8.02991	0.0465359	0.136342	CaM_pathway	Prkcg;Adcy8;Prkar2b;
R-MMU-111933	25	3	0.41353	7.25461	0.0465359	0.136342	Calmodulin_induced_events	Prkar2b;Adcy8;Prkcg;
R-MMU-5223345	25	3	0.670203	4.47626	0.0465359	0.136342	Miscellaneous_transport_and_binding_events	Dmtn;Add2;Nipa1;
R-MMU-1566948	42	4	1.37029	2.91908	0.0470608	0.136681	Elastic_fibre_formation	Loxl2;Mfap2;Fn1;Emilin2;
R-MMU-351906	11	2	0.184463	10.8423	0.0480383	0.137135	Apoptotic_cleavage_of_cell_adhesion__proteins	Dsg3;Dsg1a;
R-MMU-1362409	11	2	0.212069	9.43089	0.0480383	0.137135	Mitochondrial_iron-sulfur_cluster_biogenesis	Glrx5;Isca1;
R-MMU-5689880	179	11	5.73796	1.91706	0.0500975	0.141802	Ub-specific_processing_proteases	H2ac13;H2ac4;H2ac18;Clspn;H2ac8;H2ac7;H2ac15;H2aw;Ccna2;Cdc20;H2ac10;
R-MMU-3000178	43	4	1.40292	2.8512	0.0506092	0.142046	ECM_proteoglycans	Tnn;Col6a2;Fn1;Tnr;
R-MMU-1489509	26	3	0.815651	3.67804	0.0513784	0.143003	DAG_and_IP3_signaling	Prkcg;Adcy8;Prkar2b;
R-MMU-373760	63	5	1.46612	3.41036	0.0540618	0.149228	L1CAM_interactions	Ank1;Kif4;Ncam1;Spta1;Sptbn2;
R-MMU-166786	12	2	0.171116	11.688	0.0564312	0.150846	Creation_of_C4_and_C2_activators	C1s2;Fcnb;
R-MMU-75035	12	2	0.277892	7.19704	0.0564312	0.150846	Chk1/Chk2(Cds1)_mediated_inactivation_of_Cyclin_B:Cdk1_complex	Cdk1;Ccnb1;
R-MMU-1475029	12	2	0.365503	5.47191	0.0564312	0.150846	Reversible_hydration_of_carbon_dioxide	Car2;Car1;
R-MMU-111996	27	3	0.859343	3.49104	0.0564545	0.150846	Ca-dependent_events	Prkar2b;Prkcg;Adcy8;
R-MMU-4551638	64	5	1.05864	4.72306	0.0571515	0.151497	SUMOylation_of_chromatin_organization_proteins	H4c12;H4f16;H4c11;H4c1;H4c6;
R-MMU-2022090	65	5	1.97239	2.53499	0.0603408	0.158692	Assembly_of_collagen_fibrils_and_other_multimeric_structures	Col14a1;Col6a2;Col11a1;Col12a1;Loxl2;
R-MMU-2142691	29	3	0.744353	4.03035	0.0672869	0.175577	Synthesis_of_Leukotrienes_(LT)_and_Eoxins_(EX)	Cyp4b1;Alox5;Cyp4a32;
R-MMU-1474290	90	6	2.18686	2.74366	0.0733013	0.188328	Collagen_formation	Col12a1;Col11a1;Loxl2;Col6a2;Col19a1;Col14a1;
R-MMU-432040	30	3	0.941136	3.18764	0.0730318	0.188328	Vasopressin_regulates_renal_water_homeostasis_via_Aquaporins	Aqp1;Prkar2b;Aqp4;
R-MMU-5633008	14	2	0.445585	4.48848	0.0745757	0.19014	TP53_Regulates_Transcription_of_Cell_Death_Genes	Pidd1;Steap3;
R-MMU-983712	171	10	5.28645	1.89163	0.0754965	0.191029	Ion_channel_transport	Pln;Atp9a;Clcn2;Atp1b2;Atp7b;Atp2b4;Ano3;Trpv5;Fxyd4;Atp6v0e2;
R-MMU-352230	31	3	0.993726	3.01894	0.0789876	0.19688	Amino_acid_transport_across_the_plasma_membrane	Slc16a10;Slc38a5;Slc43a1;
R-MMU-6794361	31	3	0.993726	3.01894	0.0789876	0.19688	Neurexins_and_neuroligins	Nrxn1;Epb41;Nrxn3;
R-MMU-5578775	51	4	1.63484	2.44672	0.0840449	0.207933	Ion_homeostasis	Atp1b2;Atp2b4;Pln;Fxyd4;
R-MMU-163615	16	2	0.421629	4.74351	0.0942813	0.229854	PKA_activation	Adcy8;Prkar2b;
R-MMU-111931	16	2	0.522017	3.83129	0.0942813	0.229854	PKA-mediated_phosphorylation_of_CREB	Adcy8;Prkar2b;
R-MMU-2173782	34	3	0.818389	3.66574	0.0980549	0.235614	Binding_and_Uptake_of_Ligands_by_Scavenger_Receptors	Hbb-bs;Cd163;Hbb-bt;
R-MMU-156590	34	3	1.03559	2.89689	0.0980549	0.235614	Glutathione_conjugation	Mgst3;Gclm;Gstm5;
R-MMU-176409	76	5	2.43623	2.05235	0.101871	0.241312	APC/C:Cdc20_mediated_degradation_of_mitotic_proteins	Cdc20;Ube2c;Ccna2;Cdk1;Ccnb1;
R-MMU-425366	76	5	2.43623	2.05235	0.101871	0.241312	Transport_of_bile_salts_and_organic_acids,_metal_ions_and_amine_compounds	Slc6a9;Slc30a10;Slc14a1;Rhag;Slc22a4;
R-MMU-5686938	17	2	0.2812	7.11238	0.104633	0.243049	Regulation_of_TLR_by_endogenous_ligand	S100a8;S100a9;
R-MMU-1442490	55	4	0.985056	4.06068	0.10396	0.243049	Collagen_degradation	Col19a1;Col11a1;Col12a1;Col6a2;
R-MMU-2129379	35	3	1.11796	2.68347	0.104788	0.243049	Molecules_associated_with_elastic_fibres	Fn1;Mfap2;Emilin2;
R-MMU-176814	77	5	1.99395	2.50758	0.106213	0.244657	Activation_of_APC/C_and_APC/C:Cdc20_mediated_degradation_of_mitotic_proteins	Cdc20;Ccna2;Cdk1;Ube2c;Ccnb1;
R-MMU-140877	36	3	1.09651	2.73596	0.111697	0.255526	Formation_of_Fibrin_Clot_(Clotting_Cascade)	Serpine2;Cd177;F2r;
R-MMU-1592389	57	4	1.31999	3.03034	0.114655	0.260146	Activation_of_Matrix_Metalloproteinases	Elane;Spock3;Ctsg;Klk1;
R-MMU-166663	18	2	0.435318	4.59434	0.115274	0.260146	Initial_triggering_of_complement	C1s2;Fcnb;
R-MMU-1852241	222	3	6.0527	0.495646	0.123889	0.27586	Organelle_biogenesis_and_maintenance	Cdk1;Ninl;Prkar2b;
R-MMU-195721	222	3	6.76181	0.443668	0.123889	0.27586	Signaling_by_WNT	Sox6;Prkcg;Wnt2b;
R-MMU-419037	19	2	0.286105	6.99044	0.126176	0.279091	NCAM1_interactions	Ncam1;Col6a2;
R-MMU-6803157	93	6	2.64168	2.27128	0.127936	0.281123	Antimicrobial_peptides	Elane;Lcn2;Ctsg;S100a8;Camp;S100a9;
R-MMU-199991	537	11	12.987	0.847001	0.130491	0.284863	Membrane_Trafficking	Hbegf;Kifc5b;Rab27b;Tfrc;Kif18b;Ank1;Rab3il1;Itsn1;Spta1;Kif4;Sptbn2;
R-MMU-112043	39	3	0.889802	3.37154	0.133411	0.289346	PLC_beta_mediated_events	Adcy8;Prkar2b;Prkcg;
R-MMU-2453902	20	2	0.353639	5.65548	0.13731	0.291063	The_canonical_retinoid_cycle_in_rods_(twilight_vision)	Abca4;Rbp4;
R-MMU-109581	98	6	3.14146	1.90994	0.13856	0.291063	Apoptosis	Clspn;Dsg1a;Dsg3;Bcl2l1;H1f5;Lmna;
R-MMU-5688426	241	12	7.72542	1.55331	0.137716	0.291063	Deubiquitination	H2aw;H2ac15;Cdk1;Ccna2;H2ac10;Cdc20;H2ac13;H2ac18;H2ac4;Clspn;H2ac7;H2ac8;
R-MMU-176407	20	2	0.641113	3.11958	0.13731	0.291063	Conversion_from_APC/C:Cdc20_to_APC/C:Cdh1_in_late_anaphase	Cdc20;Ube2c;
R-MMU-211979	20	2	0.652521	3.06503	0.13731	0.291063	Eicosanoids	Cyp4b1;Cyp4a32;
R-MMU-112040	40	3	1.26397	2.37347	0.140953	0.294239	G-protein_mediated_events	Prkcg;Prkar2b;Adcy8;
R-MMU-141405	21	2	0.543806	3.67778	0.148649	0.306473	Inhibition_of_the_proteolytic_activity_of_APC/C_required_for_the_onset_of_anaphase_by_mitotic_spindle_checkpoint_components	Ube2c;Cdc20;
R-MMU-141430	21	2	0.663587	3.01392	0.148649	0.306473	Inactivation_of_APC/C_via_direct_inhibition_of_the_APC/C_complex	Cdc20;Ube2c;
R-MMU-446203	256	4	8.35227	0.478912	0.150568	0.308525	Asparagine_N-linked_glycosylation	St3gal5;Spta1;Sptbn2;Ank1;
R-MMU-1296072	42	3	1.31759	2.27688	0.156448	0.318619	Voltage_gated_Potassium_channels	Kcnf1;Kcnq1;Kcnab1;
R-MMU-75876	22	2	0.682637	2.92982	0.160168	0.322266	Synthesis_of_very_long-chain_fatty_acyl-CoAs	Acsl6;Hacd1;
R-MMU-112409	22	2	0.695186	2.87693	0.160168	0.322266	RAF-independent_MAPK1/3_activation	Cdk1;Dusp8;
R-MMU-5668599	24	2	0.372348	5.37132	0.183654	0.360827	RHO_GTPases_Activate_NADPH_Oxidases	S100a9;S100a8;
R-MMU-166658	45	3	1.3963	2.14853	0.180605	0.360827	Complement_cascade	C1s2;Fcnb;Elane;
R-MMU-1483191	24	2	0.752909	2.65636	0.183654	0.360827	Synthesis_of_PC	Pcyt1b;Abhd3;
R-MMU-211935	24	2	0.769336	2.59964	0.183654	0.360827	Fatty_acids	Cyp4b1;Cyp4a32;
R-MMU-5576891	113	6	3.68674	1.62745	0.186629	0.364527	Cardiac_conduction	Fxyd4;Pln;Atp1b2;Atp2b4;Fgf12;Kcnq1;
R-MMU-193648	47	3	1.453	2.06469	0.197235	0.383003	NRAGE_signals_death_through_JNK	Arhgef37;Itsn1;Arhgef16;
R-MMU-71291	247	4	7.91775	0.505194	0.198961	0.384122	Metabolism_of_amino_acids_and_derivatives	Smox;Asns;Nqo1;Slc25a21;
R-MMU-453276	85	5	1.406	3.55619	0.20288	0.387212	Regulation_of_mitotic_cell_cycle	Cdc20;Ube2c;Cdk1;Ccna2;Ccnb1;
R-MMU-174143	85	5	2.77321	1.80296	0.20288	0.387212	APC/C-mediated_degradation_of_cell_cycle_proteins	Ccnb1;Ube2c;Ccna2;Cdk1;Cdc20;
R-MMU-2980766	48	3	1.45654	2.05968	0.205686	0.389531	Nuclear_Envelope_Breakdown	Lmna;Cdk1;Ccnb1;
R-MMU-179409	26	2	0.827515	2.41688	0.207594	0.389531	APC-Cdc20_mediated_degradation_of_Nek2A	Cdc20;Ube2c;
R-MMU-8874081	26	2	0.833447	2.39967	0.207594	0.389531	MET_activates_PTK2_signaling	Fn1;Col11a1;
R-MMU-1482788	27	2	0.526694	3.79727	0.219686	0.401097	Acyl_chain_remodelling_of_PC	Mboat2;Pla2g4c;
R-MMU-211958	27	2	0.74538	2.68319	0.219686	0.401097	Miscellaneous_substrates	Cyp4b1;Cyp4a32;
R-MMU-1482839	27	2	0.819302	2.4411	0.219686	0.401097	Acyl_chain_remodelling_of_PE	Pla2g4c;Mboat2;
R-MMU-499943	27	2	0.862423	2.31905	0.219686	0.401097	Interconversion_of_nucleotide_di-_and_triphosphates	Tyms;Rrm2;
R-MMU-5617833	194	3	6.19667	0.484131	0.219763	0.401097	Cilium_Assembly	Cdk1;Ninl;Prkar2b;
R-MMU-71406	51	3	1.20431	2.49105	0.231497	0.418554	Pyruvate_metabolism_and_Citric_Acid_(TCA)_cycle	Fahd1;Glo1;Hagh;
R-MMU-70268	28	2	0.897559	2.22827	0.231834	0.418554	Pyruvate_metabolism	Hagh;Glo1;
R-MMU-500792	382	8	6.31873	1.26608	0.237143	0.425838	GPCR_ligand_binding	Htr2a;Prokr1;F2r;Kel;Aplnr;Tac2;Grm8;P2ry1;
R-MMU-983189	52	3	1.6669	1.79975	0.240232	0.429077	Kinesins	Kifc5b;Kif4;Kif18b;
R-MMU-418597	30	2	0.978782	2.04336	0.256236	0.455228	G_alpha_(z)_signalling_events	Adcy8;Rgs17;
R-MMU-425393	99	5	1.5924	3.13991	0.258373	0.456597	Transport_of_inorganic_cations/anions_and_amino_acids/oligopeptides	Slc38a5;Slc4a1;Slc26a3;Slc43a1;Slc16a10;
R-MMU-3301854	31	2	0.802761	2.4914	0.26846	0.471925	Nuclear_Pore_Complex_(NPC)_Disassembly	Cdk1;Ccnb1;
R-MMU-5357801	114	6	3.16016	1.89864	0.277198	0.48221	Programmed_Cell_Death	Lmna;H1f5;Bcl2l1;Dsg1a;Dsg3;Clspn;
R-MMU-1483206	114	6	3.5243	1.70247	0.277198	0.48221	Glycerophospholipid_biosynthesis	Ptdss2;Pcyt1b;Pla2g4c;Gpd1;Abhd3;Mboat2;
R-MMU-71387	264	5	8.31212	0.601532	0.287471	0.497489	Metabolism_of_carbohydrates	Hmmr;Eno1b;Fut10;Bpgm;Aldh1a1;
R-MMU-6811442	178	3	4.56879	0.656629	0.289704	0.498769	Intra-Golgi_and_retrograde_Golgi-to-ER_traffic	Kif4;Kifc5b;Kif18b;
R-MMU-75105	33	2	1.05784	1.89065	0.292886	0.501661	Fatty_acyl-CoA_biosynthesis	Hacd1;Acsl6;
R-MMU-8854518	71	4	2.19496	1.82236	0.295024	0.502744	AURKA_Activation_by_TPX2	Hmmr;Prkar2b;Ninl;Cdk1;
R-MMU-176187	34	2	0.616701	3.24306	0.305063	0.504411	Activation_of_ATR_in_response_to_replication_stress	Clspn;Cdc6;
R-MMU-6806003	34	2	0.822268	2.4323	0.305063	0.504411	Regulation_of_TP53_Expression_and_Degradation	Cdk1;Ccna2;
R-MMU-3299685	34	2	1.0705	1.86829	0.305063	0.504411	Detoxification_of_Reactive_Oxygen_Species	Prdx2;Txnrd2;
R-MMU-6798695	514	21	16.7698	1.25225	0.303894	0.504411	Neutrophil_degranulation	Lilra5;Lilra6;Ctsg;H2-Q1;Alad;Hbb-bt;Elane;Hbb-bs;S100a8;Mpo;Folr2;Hebp2;Ms4a3;Acpp;Lcn2;Fcnb;Dsg1a;Alox5;Cd177;S100a9;Camp;
R-MMU-6804757	34	2	1.10929	1.80296	0.305063	0.504411	Regulation_of_TP53_Degradation	Ccna2;Cdk1;
R-MMU-174184	73	4	2.3817	1.67947	0.30261	0.504411	Cdc20:Phospho-APC/C_mediated_degradation_of_Cyclin_A	Ube2c;Ccna2;Cdk1;Cdc20;
R-MMU-179419	74	4	2.37212	1.68626	0.306647	0.504533	APC:Cdc20_mediated_degradation_of_cell_cycle_proteins_prior_to_satisfation_of_the_cell_cycle_checkpoint	Cdc20;Ccna2;Cdk1;Ube2c;
R-MMU-5653656	570	14	10.0787	1.38907	0.328055	0.528052	Vesicle-mediated_transport	Ank1;Kif18b;Tfrc;Rab27b;Kifc5b;Hbegf;Cd163;Kif4;Sptbn2;Spta1;Rab3il1;Itsn1;Hbb-bs;Hbb-bt;
R-MMU-8875878	36	2	0.743326	2.69061	0.329289	0.528052	MET_promotes_cell_motility	Col11a1;Fn1;
R-MMU-1222556	36	2	1.0924	1.83083	0.329289	0.528052	ROS_and_RNS_production_in_phagocytes	Mpo;Atp6v0e2;
R-MMU-5358351	137	2	4.23534	0.472217	0.330428	0.528052	Signaling_by_Hedgehog	Prkar2b;Adcy8;
R-MMU-163841	36	2	1.13347	1.76449	0.329289	0.528052	Gamma_carboxylation,_hypusine_formation_and_arylsulfatase_activation	Fn3k;Fn3krp;
R-MMU-977606	36	2	1.154	1.7331	0.329289	0.528052	Regulation_of_Complement_cascade	Elane;C1s2;
R-MMU-168898	140	2	3.59343	0.556571	0.332332	0.528531	Toll-like_Receptor_Cascades	S100a8;S100a9;
R-MMU-425407	224	10	7.0016	1.42825	0.335475	0.528531	SLC-mediated_transmembrane_transport	Rhag;Slc26a3;Slc22a4;Slc38a5;Slc16a10;Slc43a1;Slc4a1;Slc30a10;Slc6a9;Slc14a1;
R-MMU-5633007	142	2	4.5519	0.439376	0.334174	0.528531	Regulation_of_TP53_Activity	Cdk1;Ccna2;
R-MMU-556833	594	15	16.8049	0.892595	0.3392	0.531891	Metabolism_of_lipids	Ptdss2;Hacd1;Gpd1;Cyp4a32;Cyp11a1;Sphk1;Mboat2;Acsl6;Pcyt1b;Abhd3;Pla2g4c;Ugt8a;Cyp4b1;Alox5;Baat;
R-MMU-3000171	38	2	1.21812	1.64188	0.35328	0.548003	Non-integrin_membrane-ECM_interactions	Fn1;Col11a1;
R-MMU-2565942	84	4	2.69268	1.48551	0.354397	0.548003	Regulation_of_PLK1_Activity_at_G2/M_Transition	Cdk1;Prkar2b;Ccnb1;Ninl;
R-MMU-3108232	154	7	4.93657	1.41799	0.353954	0.548003	SUMO_E3_ligases_SUMOylate_target_proteins	Birc5;H4c11;H4c6;H4c12;Cdca8;H4f16;H4c1;
R-MMU-9006925	252	5	6.06571	0.824306	0.364182	0.560538	Intracellular_signaling_by_second_messengers	Il1rl1;Prkcg;Hbegf;Adcy8;Prkar2b;
R-MMU-2990846	159	7	4.77036	1.46739	0.366102	0.560909	SUMOylation	H4c12;H4f16;Cdca8;H4c1;H4c11;Birc5;H4c6;
R-MMU-2559582	40	2	0.574949	3.47857	0.376965	0.574915	Senescence-Associated_Secretory_Phenotype_(SASP)	Ccna2;Ube2c;
R-MMU-1428517	165	3	5.17625	0.57957	0.379117	0.575569	The_citric_acid_(TCA)_cycle_and_respiratory_electron_transport	Hagh;Fahd1;Glo1;
R-MMU-948021	171	3	5.48152	0.547293	0.381046	0.57588	Transport_to_the_Golgi_and_subsequent_modification	Sptbn2;Ank1;Spta1;
R-MMU-4615885	41	2	1.2488	1.60153	0.388674	0.58214	SUMOylation_of_DNA_replication_proteins	Birc5;Cdca8;
R-MMU-168256	1573	57	51.3208	1.11066	0.38854	0.58214	Immune_System	Kif18b;H3c15;Acpp;Folr2;Cd177;S100a9;Camp;Dsg1a;Pianp;Cd300ld4;Alox5;Il1rl1;Asb1;Alad;Ccnf;Lilra6;H3c1;Ube2c;H2-Q1;Ms4a2;Asb11;Atp6v0e2;Asb17;Mpo;Cd300ld3;Ubac1;Hbb-bs;C1s2;Hebp2;Ms4a3;Fbxo30;Kifc5b;Bcl2l1;Lcn2;Fcnb;H3c11;H3c4;Kif4;H3c3;Cd300e;Ctsg;Sptbn2;Icam4;Lrr1;Ube2o;Ube2l6;Ctse;H3c7;Cdc20;Lilra5;Cd209e;H3c10;H3c8;S100a8;Hbb-bt;Elane;Cd300ld5;
R-MMU-1430728	1750	51	52.3044	0.975062	0.407926	0.608247	Metabolism	Car2;Cacna1a;Isca1;Cyp4b1;Nqo1;Glo1;Alas2;Urod;Aldh1a1;Ppox;Gclm;Bpgm;Glrx5;Nt5c3;Cyp11a1;Uros;Fahd1;Gpd1;Rrm2;Hacd1;Mgst3;Pnpo;Parp16;Ptdss2;Abcg2;Asns;Baat;Alox5;Slc25a21;Ugt8a;Smox;Pla2g4c;Hmbs;Hmmr;Abhd3;Pcyt1b;Hagh;Folr2;Tyms;Acsl6;Gstm5;Rbp4;Mboat2;Prkar2b;Cpox;Fut10;Eno1b;Sphk1;Cyp4a32;Alad;Car1;
R-MMU-211945	111	5	3.55818	1.40521	0.413767	0.614213	Phase_I_-_Functionalization_of_compounds	Cyp4b1;Aldh1a1;Cyp11a1;Cyp4a32;Smox;
R-MMU-2142753	62	3	1.86721	1.60667	0.45653	0.674695	Arachidonic_acid_metabolism	Cyp4a32;Cyp4b1;Alox5;
R-MMU-204998	65	3	2.08362	1.4398	0.471416	0.690583	Cell_death_signalling_via_NRAGE,_NRIF_and_NADE	Arhgef16;Arhgef37;Itsn1;
R-MMU-2995410	65	3	2.08362	1.4398	0.471416	0.690583	Nuclear_Envelope_(NE)_Reassembly	Cdk1;Ccnb1;Lmna;
R-MMU-6794362	66	3	2.04038	1.47031	0.476613	0.695148	Protein-protein_interactions_at_synapses	Nrxn1;Epb41;Nrxn3;
R-MMU-111885	69	3	1.7553	1.70911	0.492791	0.700392	Opioid_Signalling	Prkar2b;Adcy8;Prkcg;
R-MMU-380284	68	3	1.79968	1.66696	0.487309	0.700392	Loss_of_proteins_required_for_interphase_microtubule_organization_from_the_centrosome	Prkar2b;Ninl;Cdk1;
R-MMU-380259	68	3	2.04791	1.46491	0.487309	0.700392	Loss_of_Nlp_from_mitotic_centrosomes	Prkar2b;Ninl;Cdk1;
R-MMU-416482	69	3	2.10164	1.42745	0.492791	0.700392	G_alpha_(12/13)_signalling_events	Arhgef16;Arhgef37;Itsn1;
R-MMU-216083	69	3	2.141	1.40122	0.492791	0.700392	Integrin_cell_surface_interactions	Icam4;Fn1;Col6a2;
R-MMU-6805567	153	3	4.99179	0.600987	0.491863	0.700392	Keratinization	Pkp2;Dsg3;Dsg1a;
R-MMU-983168	282	11	5.62971	1.95392	0.494926	0.700447	Antigen_processing:_Ubiquitination_&_Proteasome_degradation	Ube2c;Ccnf;Cdc20;Asb11;Lrr1;Ube2o;Ube2l6;Asb17;Fbxo30;Asb1;Ubac1;
R-MMU-162582	2353	82	29.5266	2.77716	0.497516	0.701141	Signal_Transduction	Ncam1;Cenpf;Col6a2;S100a9;Cit;Grm8;Hbegf;H3c1;Nuf2;Sox6;Adcy8;Cdk1;Ntrk2;Col11a1;P2ry1;Prkar2b;Cenps;Birc5;Cenph;Sphk1;Kel;H4c11;Arhgef37;Aldh1a1;Prkcg;H4c1;Fgfrl1;H2bc13;Bcl2l1;Sptbn2;Depdc1b;Ranbp10;Sh2b2;Abca4;H3c3;H3c11;Cdc20;H3c7;Htr2a;Olfr420;Arhgap33;Cdca8;H4f16;Itsn1;Gpsm2;H3c8;Arhgef16;H3c10;Cnga1;Aplnr;Wnt2b;H2bc9;H4c6;H2bc12;Myh10;H3c15;Prokr1;Fn1;H4c12;Cenpk;Il1rl1;Spta1;Atp6v0e2;Rbp4…
R-MMU-373076	297	7	6.77618	1.03303	0.504065	0.704425	Class_A/1_(Rhodopsin-like_receptors)	Htr2a;Prokr1;Kel;F2r;Tac2;Aplnr;P2ry1;
R-MMU-397014	166	7	4.3744	1.60022	0.502347	0.704425	Muscle_contraction	Atp2b4;Fxyd4;Tmod1;Kcnq1;Fgf12;Pln;Atp1b2;
R-MMU-69017	73	3	1.64887	1.81943	0.51544	0.714345	CDK-mediated_phosphorylation_and_removal_of_Cdc6	Ccna2;Ube2c;Cdc6;
R-MMU-6806834	73	3	2.26512	1.32444	0.51544	0.714345	Signaling_by_MET	Col11a1;Ranbp10;Fn1;
R-MMU-69275	176	7	5.6418	1.24074	0.519549	0.717063	G2/M_Transition	Prkar2b;Gtse1;Ninl;Ccnb1;Hmmr;Ccna2;Cdk1;
R-MMU-453274	178	7	5.36071	1.3058	0.523786	0.719937	Mitotic_G2-G2/M_phases	Gtse1;Prkar2b;Cdk1;Ccna2;Ninl;Ccnb1;Hmmr;
R-MMU-597592	1242	44	37.5462	1.17189	0.546156	0.747607	Post-translational_protein_modification	Cdc20;Thsd7b;Lrr1;Sptbn2;H2bc7;H2bc9;H2ac15;H4c6;Cdca8;H4f16;St3gal5;H4c11;H2aw;Pigq;Ank1;Clspn;H2bc13;Rab27b;H2bc11;Fbxo30;H4c1;H2ac10;Cdk1;Asb11;Spta1;Ube2c;Muc15;Ccnf;Birc5;Ccna2;Fn3krp;Prss41;H2ac7;H2ac8;H2ac4;Asb17;Fn1;Folr2;H2bc12;H2ac13;Asb1;H4c12;H2ac18;Fn3k;
R-MMU-211859	209	8	6.07974	1.31585	0.55572	0.757594	Biological_oxidations	Gstm5;Cyp4b1;Gclm;Aldh1a1;Cyp4a32;Smox;Mgst3;Cyp11a1;
R-MMU-382556	99	4	3.15092	1.26947	0.56628	0.768852	ABC-family_proteins_mediated_transport	Abcb4;Abca4;Abcg4;Abcb6;
R-MMU-1280218	666	24	21.3491	1.12417	0.570921	0.772015	Adaptive_Immune_System	Kif18b;Asb1;Kifc5b;Cd300ld4;Pianp;Fbxo30;Asb11;Cdc20;Ctse;Ube2l6;Ube2o;Lrr1;Icam4;H2-Q1;Sptbn2;Cd300e;Ube2c;Ccnf;Kif4;Cd300ld5;Ubac1;Cd300ld3;Asb17;Cd209e;
R-MMU-9675108	259	10	3.87052	2.58363	0.591371	0.77458	Nervous_system_development	Itsn1;Col6a2;Epha4;Spta1;Reln;Slit3;Ank1;Sptbn2;Kif4;Ncam1;
R-MMU-446652	106	2	1.705	1.17302	0.58674	0.77458	Interleukin-1_family_signaling	Il1rl1;Ctsg;
R-MMU-975957	111	2	2.00068	0.999658	0.588382	0.77458	Nonsense_Mediated_Decay_(NMD)_enhanced_by_the_Exon_Junction_Complex_(EJC)	Gspt2;Magohb;
R-MMU-422475	258	10	7.97604	1.25375	0.590619	0.77458	Axon_guidance	Spta1;Reln;Slit3;Sptbn2;Ank1;Ncam1;Kif4;Col6a2;Itsn1;Epha4;
R-MMU-5610787	106	2	3.33744	0.599262	0.58674	0.77458	Hedgehog_'off'_state	Prkar2b;Adcy8;
R-MMU-449147	258	10	8.27036	1.20914	0.590619	0.77458	Signaling_by_Interleukins	H3c3;H3c11;H3c4;H3c1;Ctsg;H3c15;H3c7;H3c8;H3c10;Il1rl1;
R-MMU-9007101	110	2	3.52612	0.567195	0.587823	0.77458	Rab_regulation_of_trafficking	Rab3il1;Rab27b;
R-MMU-927802	111	2	3.55818	0.562085	0.588382	0.77458	Nonsense-Mediated_Decay_(NMD)	Gspt2;Magohb;
R-MMU-8957322	117	2	3.65708	0.546884	0.593971	0.774947	Metabolism_of_steroids	Cyp11a1;Baat;
R-MMU-2132295	131	5	3.63142	1.37687	0.619469	0.805069	MHC_class_II_antigen_presentation	Sptbn2;Kifc5b;Kif18b;Kif4;Ctse;
R-MMU-112316	323	12	8.10632	1.48033	0.630331	0.806475	Neuronal_System	Slc6a4;Cacna1a;Prkar2b;Nrxn1;Kcnq1;Prkcg;Epb41;Syn2;Adcy8;Nrxn3;Kcnab1;Kcnf1;
R-MMU-8856828	136	3	4.282	0.700607	0.630935	0.806475	Clathrin-mediated_endocytosis	Tfrc;Hbegf;Itsn1;
R-MMU-112314	136	3	4.32854	0.693074	0.630935	0.806475	Neurotransmitter_receptors_and_postsynaptic_signal_transmission	Adcy8;Prkar2b;Prkcg;
R-MMU-199977	143	3	4.58396	0.654456	0.632624	0.806475	ER_to_Golgi_Anterograde_Transport	Sptbn2;Ank1;Spta1;
R-MMU-168249	926	27	30.2117	0.893693	0.624428	0.806475	Innate_Immune_System	Mpo;Atp6v0e2;Cd209e;S100a8;Hbb-bs;Hbb-bt;Elane;Alad;H2-Q1;Cd300e;Ctsg;Lilra6;Ms4a2;Lilra5;S100a9;Camp;Cd177;Alox5;Dsg1a;Bcl2l1;Lcn2;Fcnb;C1s2;Acpp;Ms4a3;Hebp2;Folr2;
R-MMU-392499	1584	48	34.694	1.38352	0.639114	0.811651	Metabolism_of_proteins	Gspt2;Rab27b;H4c1;Fbxo30;H2bc11;H2bc13;Bche;Clspn;Ank1;H4c11;Pigq;H2aw;Cdca8;H4f16;St3gal5;H2bc9;H4c6;H2ac15;Sptbn2;Ctsg;H2bc7;Thsd7b;Cdc20;Lrr1;H4c12;Fn3k;H2ac18;Asb1;H2bc12;H2ac13;Folr2;Fn1;H2ac8;H2ac7;Asb17;H2ac4;Ccna2;Fn3krp;Birc5;Prss41;Sphk1;Ube2c;Ccnf;Muc15;Spta1;Asb11;Cdk1;H2ac10;
R-MMU-196854	178	4	4.6094	0.867792	0.666645	0.840224	Metabolism_of_vitamins_and_cofactors	Pnpo;Folr2;Parp16;Rbp4;
R-MMU-9006934	399	11	13.0178	0.844997	0.6657	0.840224	Signaling_by_Receptor_Tyrosine_Kinases	Sphk1;Hbegf;Fgfrl1;Atp6v0e2;Plat;Col6a2;Fn1;Col11a1;Ntrk2;Sh2b2;Ranbp10;
R-MMU-383280	49	2	0.76021	2.63085	0.674325	0.846709	Nuclear_Receptor_transcription_pathway	Rorc;Nr0b2;
R-MMU-186797	53	2	1.64454	1.21615	0.691605	0.865153	Signaling_by_PDGF	Plat;Col6a2;
R-MMU-76002	241	6	7.56046	0.793602	0.710871	0.885936	Platelet_activation,_signaling_and_aggregation	F2r;Serpinf2;P2ry1;Rab27b;Prkcg;Fn1;
R-MMU-2980736	58	2	1.85923	1.07571	0.714223	0.886805	Peptide_hormone_metabolism	Bche;Ctsg;
R-MMU-351202	59	2	1.86436	1.07275	0.71881	0.889195	Metabolism_of_polyamines	Smox;Nqo1;
R-MMU-2172127	60	2	1.87543	1.06642	0.723404	0.891576	DAP12_interactions	H2-Q1;Cd300e;
R-MMU-8852276	75	3	1.80527	1.6618	0.736877	0.899245	The_role_of_GTSE1_in_G2/M_progression_after_G2_checkpoint	Ccnb1;Cdk1;Gtse1;
R-MMU-380270	77	3	2.38045	1.26027	0.740396	0.899245	Recruitment_of_mitotic_centrosome_proteins_and_complexes	Cdk1;Ninl;Prkar2b;
R-MMU-211897	75	3	2.31862	1.29388	0.736877	0.899245	Cytochrome_P450_-_arranged_by_substrate_type	Cyp11a1;Cyp4a32;Cyp4b1;
R-MMU-380287	77	3	2.51221	1.19417	0.740396	0.899245	Centrosome_maturation	Cdk1;Prkar2b;Ninl;
R-MMU-163125	79	3	1.57712	1.90221	0.744222	0.899799	Post-translational_modification:_synthesis_of_GPI-anchored_proteins	Pigq;Folr2;Prss41;
R-MMU-193704	80	3	2.05339	1.461	0.74624	0.899799	p75_NTR_receptor-mediated_signalling	Arhgef37;Itsn1;Arhgef16;
R-MMU-6809371	82	3	2.33858	1.28283	0.750467	0.90164	Formation_of_the_cornified_envelope	Pkp2;Dsg3;Dsg1a;
R-MMU-983169	340	12	0.543007	22.0992	0.754513	0.903252	Class_I_MHC_mediated_antigen_processing_&_presentation	Asb11;Cdc20;Ube2l6;Ube2o;Lrr1;H2-Q1;Ube2c;Ccnf;Asb1;Ubac1;Asb17;Fbxo30;
R-MMU-199418	103	2	3.07849	0.64967	0.776162	0.910639	Negative_regulation_of_the_PI3K/AKT_network	Hbegf;Il1rl1;
R-MMU-5173105	93	2	2.82204	0.708707	0.771104	0.910639	O-linked_glycosylation	Muc15;Thsd7b;
R-MMU-69052	90	3	2.74127	1.09438	0.769384	0.910639	Switching_of_origins_to_a_post-replicative_state	Cdc6;Ube2c;Ccna2;
R-MMU-380320	88	3	2.68036	1.11925	0.764407	0.910639	Recruitment_of_NuMA_to_mitotic_centrosomes	Cdk1;Ninl;Prkar2b;
R-MMU-6811558	96	2	3.07734	0.649911	0.77185	0.910639	PI5P,_PP2A_and_IER3_Regulate_PI3K/AKT_Signaling	Il1rl1;Hbegf;
R-MMU-69206	104	2	3.33379	0.599918	0.777042	0.910639	G1/S_Transition	Ccna2;Cdc6;
R-MMU-76005	120	4	0.438056	9.13125	0.798004	0.925271	Response_to_elevated_platelet_cytosolic_Ca2+	Serpinf2;Fn1;Prkcg;Rab27b;
R-MMU-453279	127	3	2.86858	1.04581	0.800609	0.925271	Mitotic_G1_phase_and_G1/S_transition	Ccna2;E2f2;Cdc6;
R-MMU-8856688	124	3	3.89003	0.771202	0.800059	0.925271	Golgi-to-ER_retrograde_transport	Kif4;Kifc5b;Kif18b;
R-MMU-73887	120	4	3.84668	1.03986	0.798004	0.925271	Death_Receptor_Signalling	Sppl2b;Itsn1;Arhgef37;Arhgef16;
R-MMU-194840	139	5	3.34577	1.49442	0.807121	0.929581	Rho_GTPase_cycle	Depdc1b;Itsn1;Arhgef16;Arhgef37;Arhgap33;
R-MMU-375276	184	5	3.67328	1.36118	0.834955	0.958334	Peptide_ligand-binding_receptors	Kel;F2r;Aplnr;Tac2;Prokr1;
R-MMU-416476	198	7	6.0308	1.16071	0.838042	0.958583	G_alpha_(q)_signalling_events	F2r;P2ry1;Rgs17;Prokr1;Tac2;Htr2a;Hbegf;
R-MMU-5673001	256	7	7.94342	0.881233	0.857302	0.977266	RAF/MAP_kinase_cascade	Fn1;Spta1;Ncam1;Sptbn2;Bcl2l1;Dusp8;Hbegf;
R-MMU-5683057	285	8	9.13587	0.87567	0.864657	0.982298	MAPK_family_signaling_cascades	Bcl2l1;Hbegf;Dusp8;Ncam1;Sptbn2;Fn1;Cdk1;Spta1;
R-MMU-418594	346	10	9.11773	1.09676	0.87677	0.992682	G_alpha_(i)_signalling_events	Aplnr;Cnga1;Gpsm2;Prkar2b;Grm8;Rbp4;Rgs17;Prkcg;Abca4;Adcy8;
R-MMU-1280215	378	11	5.69199	1.93254	0.881833	0.995042	Cytokine_Signaling_in_Immune_system	H3c3;H3c4;H3c11;Ctsg;H3c1;H3c15;Ube2l6;H3c7;H3c8;H3c10;Il1rl1;
R-MMU-9009391	68	2	0.263746	7.58305	1	1	Extra-nuclear_estrogen_signaling	Hbegf;Sphk1;
R-MMU-70171	61	2	0.250513	7.98362	1	1	Glycolysis	Eno1b;Bpgm;
R-MMU-2682334	65	2	1.04552	1.91293	1	1	EPH-Ephrin_signaling	Itsn1;Epha4;
R-MMU-8939236	66	2	1.07666	1.8576	1	1	RUNX1_regulates_transcription_of_genes_involved_in_differentiation_of_HSCs	Gata1;Tal1;
R-MMU-3700989	281	9	5.80208	1.55117	1	1	Transcriptional_Regulation_by_TP53	Steap3;Pidd1;E2f8;Ccna2;E2f7;Prdx2;Cdk1;Gadd45a;Ccnb1;
R-MMU-69242	143	4	3.01791	1.32542	1	1	S_Phase	Cdc6;Ube2c;Esco2;Ccna2;
R-MMU-114608	115	3	2.62377	1.14339	1	1	Platelet_degranulation_	Rab27b;Fn1;Serpinf2;
R-MMU-5684996	262	8	6.18686	1.29306	1	1	MAPK1/MAPK3_signaling	Fn1;Cdk1;Spta1;Ncam1;Sptbn2;Bcl2l1;Dusp8;Hbegf;
R-MMU-8876198	86	2	2.07985	0.961606	1	1	RAB_GEFs_exchange_GTP_for_GDP_on_RABs	Rab3il1;Rab27b;
R-MMU-174154	68	2	1.74538	1.14588	1	1	APC/C:Cdc20_mediated_degradation_of_Securin	Cdc20;Ube2c;
R-MMU-196849	116	3	3.00388	0.998709	1	1	Metabolism_of_water-soluble_vitamins_and_cofactors	Pnpo;Folr2;Parp16;
R-MMU-8856825	98	3	2.53776	1.18215	1	1	Cargo_recognition_for_clathrin-mediated_endocytosis	Itsn1;Hbegf;Tfrc;
R-MMU-69306	123	4	3.57803	1.11793	1	1	DNA_Replication	Cdc6;E2f2;Ube2c;Ccna2;
R-MMU-159236	69	2	2.07803	0.96245	1	1	Transport_of_Mature_mRNA_derived_from_an_Intron-Containing_Transcript	Nxf7;Magohb;
R-MMU-202733	108	3	3.27721	0.915414	1	1	Cell_surface_interactions_at_the_vascular_wall	Cd177;Fn1;Atp1b2;
R-MMU-174178	74	2	2.24549	0.890673	1	1	APC/C:Cdh1_mediated_degradation_of_Cdc20_and_other_APC/C:Cdh1_targeted_proteins_in_late_mitosis/early_G1	Cdc20;Ube2c;
R-MMU-428157	82	2	2.4976	0.800767	1	1	Sphingolipid_metabolism	Sphk1;Ugt8a;
R-MMU-8951664	214	7	6.61579	1.05808	1	1	Neddylation	Fbxo30;Asb17;Ccnf;Lrr1;Asb11;Asb1;Birc5;
R-MMU-6807878	92	3	2.87566	1.04324	1	1	COPI-mediated_anterograde_transport	Ank1;Sptbn2;Spta1;
R-MMU-69002	82	2	2.57244	0.777472	1	1	DNA_Replication_Pre-Initiation	Cdc6;E2f2;
R-MMU-68949	70	2	2.19598	0.910753	1	1	Orc1_removal_from_chromatin	Ccna2;Cdc6;
R-MMU-8978868	172	5	5.41547	0.923281	1	1	Fatty_acid_metabolism	Cyp4a32;Cyp4b1;Acsl6;Hacd1;Alox5;
R-MMU-1296071	98	3	3.08556	0.972271	1	1	Potassium_Channels	Kcnab1;Kcnf1;Kcnq1;
R-MMU-72202	78	2	2.45585	0.814381	1	1	Transport_of_Mature_Transcript_to_Cytoplasm	Nxf7;Magohb;
R-MMU-5620912	95	3	2.9911	1.00297	1	1	Anchoring_of_the_basal_body_to_the_plasma_membrane	Cdk1;Ninl;Prkar2b;
R-MMU-1266738	462	14	14.5989	0.958976	0.893039	1	Developmental_Biology	Reln;Spta1;Slit3;Ank1;Sptbn2;Kif4;Ncam1;Pkp2;Dsg3;Dsg1a;Itsn1;Col6a2;Lgi1;Epha4;
R-MMU-6811434	91	3	2.87554	1.04328	1	1	COPI-dependent_Golgi-to-ER_retrograde_traffic	Kif4;Kifc5b;Kif18b;
R-MMU-2187338	91	3	2.87554	1.04328	1	1	Visual_phototransduction	Abca4;Cnga1;Rbp4;
R-MMU-70326	80	2	2.55533	0.782679	1	1	Glucose_metabolism	Bpgm;Eno1b;
R-MMU-68867	67	2	2.14773	0.931216	1	1	Assembly_of_the_pre-replicative_complex	Cdc6;E2f2;
R-MMU-15869	95	3	3.04529	0.985128	1	1	Metabolism_of_nucleotides	Nt5c3;Rrm2;Tyms;
R-MMU-8878166	63	2	2.01951	0.990341	1	1	Transcriptional_regulation_by_RUNX2	Cdk1;Ccnb1;
R-MMU-1483257	186	6	5.96235	1.00631	1	1	Phospholipid_metabolism	Gpd1;Abhd3;Mboat2;Pcyt1b;Pla2g4c;Ptdss2;
R-MMU-69239	115	3	3.6864	0.813802	1	1	Synthesis_of_DNA	Ccna2;Ube2c;Cdc6;
R-MMU-163685	78	2	2.54483	0.785906	1	1	Integration_of_energy_metabolism	Prkar2b;Cacna1a;
R-MMU-112315	199	6	6.49259	0.924131	1	1	Transmission_across_Chemical_Synapses	Cacna1a;Slc6a4;Prkar2b;Adcy8;Syn2;Prkcg;
R-MMU-2672351	98	3	3.19735	0.938276	1	1	Stimuli-sensing_channels	Ano3;Trpv5;Clcn2;
R-MMU-156580	92	3	3.0016	0.999468	1	1	Phase_II_-_Conjugation_of_compounds	Gstm5;Mgst3;Gclm;
Table S4f: Results of 904 DEGs (down-regulated in normal mice in NM vs AM comparison) in panther enrichment analysis for biological function
Sr. No.	Biological Function	No. of Genes
1	developmental process (GO:0032502)	31	5.9%	3.4%
2	multicellular organismal process (GO:0032501)	36	6.9%	3.9%
3	cellular process (GO:0009987)	272	52.1%	29.8%
4	reproduction (GO:0000003)	8	1.5%	0.9%
5	localization (GO:0051179)	69	13.2%	7.5%
6	reproductive process (GO:0022414)	8	1.5%	0.9%
7	multi-organism process (GO:0051704)	4	0.8%	0.4%
8	biological adhesion (GO:0022610)	11	2.1%	1.2%
9	immune system process (GO:0002376)	22	4.2%	2.4%
10	biological regulation (GO:0065007)	161	30.8%	17.6%
11	growth (GO:0040007)	1	0.2%	0.1%
12	signaling (GO:0023052)	44	8.4%	4.8%
13	metabolic process (GO:0008152)	159	30.5%	17.4%
14	interspecies interaction between organisms (GO:0044419)	11	2.1%	1.2%
15	pigmentation (GO:0043473)	1	0.2%	0.1%
16	response to stimulus (GO:0050896)	67	12.8%	7.3%
17	biological phase (GO:0044848)	2	0.4%	0.2%
18	rhythmic process (GO:0048511)	2	0.4%	0.2%
19	locomotion (GO:0040011)	5	1.0%	0.5%
Table S5a: Results of 487 DEGs (up-regulated in C3G treatment CAM vs AM comparison) in panther enrichment analysis for molecular function
Sr. No.	Molecular Function	No. of Genes
1	translation regulator activity (GO:0045182)	2	0.5%	0.6%
2	molecular transducer activity (GO:0060089)	5	1.2%	1.6%
3	molecular adaptor activity (GO:0060090)	2	0.5%	0.6%
4	binding (GO:0005488)	137	34.1%	42.5%
5	structural molecule activity (GO:0005198)	3	0.7%	0.9%
6	molecular function regulator (GO:0098772)	34	8.5%	10.6%
7	catalytic activity (GO:0003824)	119	29.6%	37.0%
8	transporter activity (GO:0005215)	20	0.05	0.062
Table S5b: Results of 487 DEGs (up-regulated in C3G treatment CAM vs AM comparison) in panther enrichment analysis for cellular components
Sr. No.	Cellular Component	No. of Genes
1	cellular anatomical entity (GO:0110165)	240	59.7%	49.5%
2	protein-containing complex (GO:0032991)	54	13.4%	11.1%
3	intracellular (GO:0005622)	191	47.5%	39.4%
Table S5c: Results of 487 DEGs (up-regulated in C3G treatment CAM vs AM comparison) in panther enrichment analysis for protein class
Sr. No.	Protein Class	No. of Genes
1	extracellular matrix protein (PC00102)	2	0.5%	0.7%
2	cytoskeletal protein (PC00085)	24	6.0%	8.9%
3	transporter (PC00227)	22	5.5%	8.2%
4	scaffold/adaptor protein (PC00226)	10	2.5%	3.7%
5	cell adhesion molecule (PC00069)	1	0.2%	0.4%
6	nucleic acid metabolism protein (PC00171)	17	4.2%	6.3%
7	intercellular signal molecule (PC00207)	3	0.7%	1.1%
8	protein-binding activity modulator (PC00095)	15	3.7%	5.6%
9	calcium-binding protein (PC00060)	2	0.5%	0.7%
10	gene-specific transcriptional regulator (PC00264)	9	2.2%	3.3%
11	defense/immunity protein (PC00090)	7	1.7%	2.6%
12	metabolite interconversion enzyme (PC00262)	51	12.7%	19.0%
13	protein modifying enzyme (PC00260)	51	12.7%	19.0%
14	chromatin/chromatin-binding	or -regulatory protein (PC00077)	33	8.2%	0.123
15	transfer/carrier protein (PC00219)	6	0.015	2.2%
16	membrane traffic protein (PC00150)	3	0.7%	1.1%
17	chaperone (PC00072)	3	0.7%	1.1%
18	cell junction protein (PC00070)	1	0.2%	0.4%
19	structural protein (PC00211)	1	0.2%	0.4%
20	transmembrane signal receptor (PC00197)	8	2.0%	3.0%
Table S5d: Results of 487 DEGs (up-regulated in C3G treatment CAM vs AM comparison) in panther enrichment analysis for pathways
Sr. No.	Pathways	No. of Genes
1	Beta2 adrenergic receptor signaling pathway (P04378)	1	0.002	0.009
2	Metabotropic glutamate receptor group III pathway (P00039)	1	0.002	0.009
3	Beta1 adrenergic receptor signaling pathway (P04377)	1	0.002	0.009
4	De novo pyrimidine deoxyribonucleotide biosynthesis (P02739)	2	0.005	0.018
5	Apoptosis signaling pathway (P00006)	1	0.002	0.009
6	De novo purine biosynthesis (P02738)	1	0.002	0.009
7	Angiogenesis (P00005)	1	0.002	0.009
8	Alzheimer disease-presenilin pathway (P00004)	3	0.007	0.028
9	5HT1 type receptor mediated signaling pathway (P04373)	1	0.002	0.009
10	Integrin signalling pathway (P00034)	2	0.005	0.018
11	5-Hydroxytryptamine degredation (P04372)	2	0.005	0.018
12	Adrenaline and noradrenaline biosynthesis (P00001)	1	0.002	0.009
13	Inflammation mediated by chemokine and cytokine signaling pathway (P00031)	6	0.015	0.055
14	Asparagine and aspartate biosynthesis (P02730)	1	0.002	0.009
15	Ubiquitin proteasome pathway (P00060)	3	0.007	0.028
16	Nicotine pharmacodynamics pathway (P06587)	2	0.005	0.018
17	GABA-B receptor II signaling (P05731)	2	0.005	0.018
18	Huntington disease (P00029)	5	0.012	0.046
19	Endogenous cannabinoid signaling (P05730)	1	0.002	0.009
20	p53 pathway (P00059)	9	0.022	0.083
21	p53 pathway feedback loops 2 (P04398)	2	0.005	0.018
22	Heterotrimeric G-protein signaling pathway-Gq alpha and Go alpha mediated pathway (P00027)	2	0.005	0.018
23	Pyridoxal-5-phosphate biosynthesis (P02759)	1	0.002	0.009
24	Heterotrimeric G-protein signaling pathway-Gi alpha and Gs alpha mediated pathway (P00026)	4	0.01	0.037
25	Wnt signaling pathway (P00057)	2	0.005	0.018
26	Ornithine degradation (P02758)	1	0.002	0.009
27	Hedgehog signaling pathway (P00025)	2	0.005	0.018
28	Glycolysis (P00024)	1	0.002	0.009
29	Transcription regulation by bZIP transcription factor (P00055)	1	0.002	0.009
30	Vitamin B6 metabolism (P02787)	1	0.002	0.009
31	FAS signaling pathway (P00020)	1	0.002	0.009
32	Plasminogen activating cascade (P00050)	2	0.005	0.018
33	Endothelin signaling pathway (P00019)	1	0.002	0.009
34	p38 MAPK pathway (P05918)	1	0.002	0.009
35	Parkinson disease (P00049)	4	0.01	0.037
36	DNA replication (P00017)	3	0.007	0.028
37	PI3 kinase pathway (P00048)	1	0.002	0.009
38	Cytoskeletal regulation by Rho GTPase (P00016)	4	0.01	0.037
39	PDGF signaling pathway (P00047)	1	0.002	0.009
40	Histamine H2 receptor mediated signaling pathway (P04386)	1	0.002	0.009
41	Oxidative stress response (P00046)	1	0.002	0.009
42	Heme biosynthesis (P02746)	6	0.015	0.055
43	Cell cycle (P00013)	3	0.007	0.028
44	Nicotinic acetylcholine receptor signaling pathway (P00044)	1	0.002	0.009
45	Enkephalin release (P05913)	1	0.002	0.009
46	Muscarinic acetylcholine receptor 2 and 4 signaling pathway (P00043)	3	0.007	0.028
47	Blood coagulation (P00011)	1	0.002	0.009
48	Dopamine receptor mediated signaling pathway (P05912)	2	0.005	0.018
49	Muscarinic acetylcholine receptor 1 and 3 signaling pathway (P00042)	1	0.002	0.009
50	Angiotensin II-stimulated signaling through G proteins and beta-arrestin (P05911)	1	0.002	0.009
51	Tetrahydrofolate biosynthesis (P02742)	1	0.002	0.009
52	Metabotropic glutamate receptor group I pathway (P00041)	1	0.002	0.009
53	CCKR signaling map (P06959)	3	0.007	0.028
54	Metabotropic glutamate receptor group II pathway (P00040)	1	0.002	0.009
55	Pyridoxal phosphate salvage pathway (P02770)	1	0.002	0.009
Table S5e: Results of 487 DEGs (up-regulated in C3G treatment CAM vs AM comparison) Reactome pathway analysis
TermID	TermGeneNum	ObservedGeneNum	ExpectedGeneNum	RichFactor	rawP	adjP	TermName	GeneList
R-MMU-1640170	597	85	17.0941	4.97247	7.20929e-38	2.42953e-35	Cell_Cycle	Sgo2a;H2ac7;H2ac8;H3c11;H4c8;Cdca5;Bub1b;Cdk1;Hmmr;Ninl;Cdc25c;Tpx2;H2ax;Aurkb;Gtse1;Oip5;H2bc8;Tubb4b;Lig1;H3c7;Spc24;Gins1;Ncaph;Clspn;Ube2c;Ccna2;Cdc25b;Cenpn;Mis18bp1;H2ac15;H2bc6;H2bc7;H2bu2;Birc5;H4c1;Cenpk;Cdc45;Ccnb1;H3c15;Ncapg;Espl1;H2bc13;H3c10;Aurka;Kif18a;Kntc1;H3c4;Sgo1;Ccne1;Chek1;E2f1;Esco2;Kif23;Ska1;Lmna;Pif1;E2f2;H2bc12;Fzr1;Kif2c;Cenpi;Fbxo5;Cdca8;H2bc11;Blm;Prkar2b;Tuba4a;H3c…
R-MMU-69278	515	79	14.7462	5.35732	2.39544e-37	4.03631e-35	Cell_Cycle,_Mitotic	H2bc11;Fbxo5;Cdca8;Kif2c;Cenpi;Fzr1;H2bc12;Lmna;E2f2;Ska1;Esco2;Kif23;E2f1;Ccnb2;Nek2;Cdc6;Cep76;Cdc20;Cenpe;H2ac4;Ccne2;Mcm2;Nuf2;H4c4;H2bc9;Plk1;Bub1;Cenpf;Tuba4a;H3c8;H4c11;Optn;Prkar2b;Lig1;Tubb4b;H2bc8;Spc24;H3c7;Aurkb;Gtse1;Cdc25c;Ninl;Hmmr;H2ax;Tpx2;Bub1b;Cdk1;Cdca5;H4c8;H3c11;H2ac8;Sgo2a;H2ac7;Ccne1;Sgo1;H2bc13;Kntc1;H3c4;H3c10;Aurka;Kif18a;H3c15;Espl1;Ncapg;H4c1;Ccnb1;Cenpk;Cdc45;H2bu2;H…
R-MMU-68886	399	60	11.4247	5.25178	1.9922e-27	2.2379e-25	M_Phase	Spc24;H3c7;H2bc11;Cdca8;H2bc8;Tubb4b;Fbxo5;Cenpi;Kif2c;Aurkb;H2ax;H2bc12;Ninl;Cdk1;Bub1b;Lmna;Cdca5;H4c8;Ska1;H3c11;Kif23;H2ac8;H2ac7;Sgo2a;Sgo1;Nek2;Cep76;Ccnb2;Cdc20;H3c4;Kntc1;Kif18a;H3c10;H2bc13;Espl1;Cenpe;H2ac4;Ncapg;H3c15;Ccnb1;Cenpk;H4c1;Birc5;Nuf2;H2bu2;H2bc7;H2bc6;H2ac15;Plk1;H2bc9;H4c4;H4c11;Cenpn;Bub1;Cenpf;H3c8;Tuba4a;Ube2c;Prkar2b;Ncaph;
R-MMU-69620	281	51	7.82158	6.52042	3.4876e-27	2.9383e-25	Cell_Cycle_Checkpoints	H3c11;Ska1;H4c8;Sgo2a;Chek1;Kif2c;Aurkb;Gtse1;Cenpi;Cdca8;H2bc8;H2bc11;Spc24;Blm;Bub1b;Cdk1;Cdc25c;H2bc12;H2ax;Plk1;H2bc9;H4c4;H2bc7;H2bc6;Mcm2;H2bu2;Ccne2;Birc5;Nuf2;Clspn;Ube2c;Ccna2;Cenpf;H3c8;Bub1;H4c11;Cenpn;H2bc13;Kntc1;Kif18a;H3c10;Cdc20;Ccnb2;Sgo1;Cdc6;Ccne1;H4c1;Cdc45;Cenpk;Ccnb1;Cenpe;
R-MMU-2299718	77	26	0.360141	72.1939	1.7979e-21	1.21178e-19	Condensation_of_Prophase_Chromosomes	H3c8;H3c15;H2ac4;H2ac8;H2bc12;H2ax;H4c11;H4c1;H2ac7;Cdk1;Ccnb1;H2bc8;H2bc7;H2bc6;H2bu2;H2bc11;H4c8;H3c7;H2bc13;H4c4;H3c11;Plk1;H2bc9;H3c4;H3c10;H2ac15;
R-MMU-2559586	89	26	2.4773	10.4953	1.17708e-19	6.61126e-18	DNA_Damage/Telomere_Stress_Induced_Senescence	H2ac7;H4c1;H2ac4;H2ac8;H2bc12;H2ax;H4c11;Ccna2;H3c8;H2ac15;H3c10;H1f4;H1f3;H2bc13;H4c4;H3c11;H2bc9;H4c8;Ccne1;H2bc8;H2bc7;H2bc6;H1f5;H2bu2;Ccne2;H2bc11;
R-MMU-73886	130	29	2.74356	10.5702	2.99838e-18	1.44351e-16	Chromosome_Maintenance	H2ac15;H4c4;H3c11;H2bc9;Mis18bp1;H4c8;H2bu2;H2bc6;H2bc7;H2ac7;Cenpn;H4c11;H2ac8;H3c8;Ccna2;Cenpi;Oip5;H3c10;H2bc13;Blm;H2bc11;Lig1;H2bc8;Pif1;Cenpk;H4c1;H2ax;H2bc12;H2ac4;
R-MMU-8936459	83	24	1.53388	15.6466	4.16754e-18	1.75558e-16	RUNX1_regulates_genes_involved_in_megakaryocyte_differentiation_and_platelet_function	H3c7;H4c8;H2bc11;H2bu2;H2bc7;H2bc6;H2bc8;H3c10;H2ac15;H3c4;H2bc9;H4c4;H3c11;Gata1;H2bc13;H4c11;H2ax;H2bc12;H2ac8;H2ac4;H3c15;H3c8;H2ac7;H4c1;
R-MMU-212300	79	23	2.18093	10.546	1.80212e-17	6.74794e-16	PRC2_methylates_histones_and_DNA	H2bc12;H2ac4;H2ac8;H2ax;H4c11;H3c8;H3c15;H2ac7;H4c1;H3c7;H4c8;H2bc7;H2bc6;H2bc8;H2bu2;H2bc11;H2ac15;H3c10;H3c4;H4c4;H3c11;H2bc9;H2bc13;
R-MMU-110330	63	21	1.8039	11.6414	2.06418e-17	6.95628e-16	Recognition_and_association_of_DNA_glycosylase_with_site_containing_an_affected_purine	H3c8;H2bc6;H2bc7;H2bc8;H2bc11;H2bu2;H2bc12;H2ac8;Neil3;H4c8;H2ac4;H4c11;H2ax;H2bc9;H4c4;H3c11;H4c1;H2bc13;H2ac15;H3c10;H2ac7;
R-MMU-3214815	89	24	2.4976	9.60921	2.51321e-17	7.69956e-16	HDACs_deacetylate_histones	H2bc11;H2bc14;H2bu2;H2bc7;H2bc6;H2bc8;H3c7;H4c8;H2bc9;H3c11;H4c4;H2bc13;H2ac15;H3c10;H3c4;H3c15;H3c8;H4c11;H2bc12;H2ac8;H2ac4;H4c1;H2aw;H2ac7;
R-MMU-110331	65	21	1.80185	11.6547	4.31015e-17	1.11732e-15	Cleavage_of_the_damaged_purine	H3c8;H2ax;H4c11;H2bc12;H2ac4;H2ac8;Neil3;H4c1;H2ac7;H2bu2;H2bc11;H2bc6;H2bc7;H2bc8;H4c8;H3c11;H4c4;H2bc9;H2bc13;H2ac15;H3c10;
R-MMU-73927	65	21	1.80926	11.6069	4.31015e-17	1.11732e-15	Depurination	H2ac15;H3c10;H2bc13;H3c11;H4c4;H2bc9;H4c8;H2bu2;H2bc11;H2bc8;H2bc7;H2bc6;H2ac7;H4c1;H2ax;H4c11;H2ac4;Neil3;H2ac8;H2bc12;H3c8;
R-MMU-68875	135	28	3.8655	7.24356	9.15278e-17	2.20321e-15	Mitotic_Prophase	H2ac7;H2ac8;H4c11;H3c8;H2ac15;H3c11;H4c4;H2bc9;Plk1;H4c8;H2bc6;H2bc7;H2bu2;Cdk1;Ccnb1;Lmna;H4c1;H2ac4;H2bc12;H2ax;H3c15;H3c4;H3c10;H2bc13;H3c7;H2bc8;Ccnb2;H2bc11;
R-MMU-606279	78	22	0.418207	52.6055	1.97116e-16	4.01999e-15	Deposition_of_new_CENPA-containing_nucleosomes_at_the_centromere	H2bc6;H2bc7;H2bc8;H2bc11;H2bu2;H4c8;Mis18bp1;H2bc9;H4c4;H2bc13;H2ac15;Cenpi;Oip5;H2bc12;H2ac8;H2ac4;Cenpn;H4c11;H2ax;H4c1;Cenpk;H2ac7;
R-MMU-774815	78	22	1.69062	13.013	1.97116e-16	4.01999e-15	Nucleosome_assembly	H4c1;Cenpk;H2ac7;H2bc12;H2ac8;H2ac4;Cenpn;H4c11;H2ax;Mis18bp1;H2bc9;H4c4;H2bc13;H2ac15;Cenpi;Oip5;H2bc7;H2bc6;H2bc8;H2bc11;H2bu2;H4c8;
R-MMU-2500257	117	26	3.36345	7.73016	2.02789e-16	4.01999e-15	Resolution_of_Sister_Chromatid_Cohesion	Sgo2a;Bub1b;Ccnb1;Cdk1;Cenpk;Bub1;Tuba4a;Cenpf;Cenpn;Cenpe;Aurkb;Plk1;Kif2c;Cdc20;Cenpi;Kif18a;Kntc1;Ccnb2;Ska1;Tubb4b;Cdca8;Cdca5;Nuf2;Birc5;Spc24;Sgo1;
R-MMU-68877	188	32	5.14716	6.21702	2.28564e-16	4.27923e-15	Mitotic_Prometaphase	Ninl;Cenpe;Ncapg;Bub1b;Ccnb1;Cenpk;Cdk1;Ccnb2;Cdca8;Tubb4b;Sgo1;Spc24;Nek2;Cep76;Kif2c;Aurkb;Cenpi;Cdc20;Kntc1;Kif18a;Bub1;Cenpf;Tuba4a;Cenpn;Sgo2a;Prkar2b;Ncaph;Ska1;Birc5;Nuf2;Cdca5;Plk1;
R-MMU-73929	72	21	2.0616	10.1863	4.5772e-16	8.11851e-15	Base-Excision_Repair,_AP_Site_Formation	H2bu2;H2bc11;H2bc7;H2bc6;H2bc8;H4c8;H4c4;H3c11;H2bc9;H2bc13;H3c10;H2ac15;H3c8;H2ax;H4c11;H2bc12;H2ac4;Neil3;H2ac8;H4c1;H2ac7;
R-MMU-9670095	65	20	1.86858	10.7033	7.31097e-16	1.2319e-14	Inhibition_of_DNA_recombination_at_telomere	H2ac15;H3c10;H2bc13;H3c11;H4c4;H2bc9;H4c8;H2bc8;H2bc6;H2bc7;H2bu2;H2bc11;H2ac7;H4c1;H2ac4;H2ac8;H2bc12;H2ax;H4c11;H3c8;
R-MMU-157579	104	24	2.63381	9.11227	1.22882e-15	1.97197e-14	Telomere_Maintenance	H2bc7;H2bc6;H2bc8;H2bc11;H2bu2;Lig1;H4c8;Blm;H2bc9;H3c11;H4c4;H2bc13;H2ac15;H3c10;H3c8;Ccna2;H2bc12;H2ac8;H2ac4;H4c11;H2ax;H4c1;Pif1;H2ac7;
R-MMU-2559583	153	28	4.43326	6.31589	2.809e-15	4.30288e-14	Cellular_Senescence	H2ac8;H4c11;H3c8;Ccna2;Ube2c;H2ac7;H4c8;H2bc6;H2bc7;Ccne2;H2bu2;H2ac15;H1f3;H4c4;H3c11;H2bc9;H2bc12;Fzr1;H2ac4;H2ax;H4c1;Ccne1;H1f5;H2bc8;H2bc11;H3c10;H1f4;H2bc13;
R-MMU-3214847	72	20	2.06982	9.6627	6.71677e-15	9.84153e-14	HATs_acetylate_histones	H3c8;H3c15;H2bc12;Brpf3;H4c11;H4c1;H2bc6;H2bc7;H2bc8;H2bu2;H2bc14;H2bc11;H3c7;H4c8;H4c4;H3c11;H2bc9;H2bc13;H3c10;H3c4;
R-MMU-73884	93	22	2.6629	8.26166	1.14313e-14	1.60515e-13	Base_Excision_Repair	H3c8;H2bc12;H2ac8;Neil3;H2ac4;H4c11;H2ax;H4c1;H2ac7;H2bc6;H2bc7;H2bc8;H2bc11;H2bu2;Lig1;H4c8;H2bc9;H3c11;H4c4;H2bc13;H3c10;H2ac15;
R-MMU-212165	109	23	3.13347	7.34011	3.94132e-14	5.3129e-13	Epigenetic_regulation_of_gene_expression	H3c8;H3c15;H2ac8;H2ac4;H2bc12;H4c11;H2ax;H4c1;H2ac7;H2bc8;H2bc6;H2bc7;H2bc11;H2bu2;H4c8;H3c7;H2bc13;H2bc9;H3c11;H4c4;H3c4;H2ac15;H3c10;
R-MMU-69473	90	21	2.6078	8.05276	6.32219e-14	8.19454e-13	G2/M_DNA_damage_checkpoint	H3c10;H4c4;H3c11;H2bc9;H2bc13;H4c8;Blm;H2bc6;H2bc7;H2bc8;H2bu2;H2bc11;Cdk1;Ccnb1;Chek1;H4c1;H2bc12;H2ax;H4c11;H3c8;Cdc25c;
R-MMU-69481	162	27	4.3614	6.19068	9.96006e-14	1.24316e-12	G2/M_Checkpoints	H3c11;H4c4;H2bc9;H4c8;H2bc6;H2bc7;H2bu2;Mcm2;Chek1;Clspn;H4c11;H3c8;H3c10;Gtse1;H2bc13;Cdc6;Blm;H2bc8;Ccnb2;H2bc11;Cdk1;Cdc45;Ccnb1;H4c1;H2bc12;H2ax;Cdc25c;
R-MMU-9648025	106	22	2.86585	7.67662	2.07804e-13	2.50107e-12	EML4_and_NUDC_in_mitotic_spindle_formation	Tubb4b;Cdca8;Ska1;Nuf2;Birc5;Spc24;Sgo1;Kif2c;Aurkb;Plk1;Cdc20;Cenpi;Kntc1;Kif18a;Bub1;Cenpf;Tuba4a;Cenpe;Cenpn;Bub1b;Sgo2a;Cenpk;
R-MMU-5693607	87	20	1.87577	10.6623	3.46805e-13	4.03011e-12	Processing_of_DNA_double-strand_break_ends	H2bc9;H3c11;H4c4;H2bc13;H3c10;H2bc11;H2bu2;H2bc7;H2bc6;H2bc8;Blm;H4c8;H4c1;Clspn;Chek1;H3c8;Ccna2;H4c11;H2ax;H2bc12;
R-MMU-141424	90	20	1.65298	12.0994	6.88672e-13	7.48654e-12	Amplification_of_signal_from_the_kinetochores	Cenpk;Bub1b;Sgo2a;Cenpe;Cenpn;Bub1;Cenpf;Cdc20;Cenpi;Kntc1;Kif18a;Kif2c;Aurkb;Plk1;Nuf2;Birc5;Spc24;Sgo1;Cdca8;Ska1;
R-MMU-141444	90	20	2.58727	7.73016	6.88672e-13	7.48654e-12	Amplification__of_signal_from_unattached__kinetochores_via_a_MAD2__inhibitory_signal	Plk1;Aurkb;Kif2c;Kif18a;Kntc1;Cenpi;Cdc20;Ska1;Cdca8;Spc24;Sgo1;Nuf2;Birc5;Sgo2a;Bub1b;Cenpk;Cenpf;Bub1;Cenpn;Cenpe;
R-MMU-2555396	220	30	6.37463	4.70616	9.28295e-13	9.7761e-12	Mitotic_Metaphase_and_Anaphase	Ska1;Cdca5;Nuf2;Birc5;Plk1;Bub1;Tuba4a;Cenpf;Cenpn;Sgo2a;Ube2c;Ccnb2;Fbxo5;Tubb4b;Cdca8;Spc24;Sgo1;Aurkb;Kif2c;Cdc20;Cenpi;Kif18a;Kntc1;Cenpe;Espl1;Bub1b;Lmna;Ccnb1;Cenpk;Cdk1;
R-MMU-69618	107	21	2.62434	8.002	2.37504e-12	2.37668e-11	Mitotic_Spindle_Checkpoint	Kntc1;Kif18a;Cenpi;Cdc20;Kif2c;Plk1;Aurkb;Sgo1;Spc24;Birc5;Nuf2;Cdca8;Ska1;Cenpk;Ube2c;Bub1b;Sgo2a;Cenpe;Cenpn;Cenpf;Bub1;
R-MMU-5663220	131	23	3.30265	6.96411	2.39784e-12	2.37668e-11	RHO_GTPases_Activate_Formins	Cenpk;Bub1b;Cenpe;Kntc1;Kif18a;Cdc20;Cenpi;Kif2c;Diaph3;Aurkb;Spc24;Sgo1;Tubb4b;Cdca8;Sgo2a;Cenpn;Cenpf;Tuba4a;Bub1;Plk1;Nuf2;Birc5;Ska1;
R-MMU-68882	219	29	4.59685	6.30867	4.84401e-12	4.66409e-11	Mitotic_Anaphase	Sgo2a;Ube2c;Bub1;Cenpf;Tuba4a;Cenpn;Plk1;Ska1;Birc5;Nuf2;Cdca5;Bub1b;Lmna;Ccnb1;Cdk1;Cenpk;Cenpe;Espl1;Kif2c;Aurkb;Cenpi;Cdc20;Kntc1;Kif18a;Ccnb2;Cdca8;Tubb4b;Sgo1;Spc24;
R-MMU-195258	239	30	6.62526	4.52813	8.14737e-12	7.62684e-11	RHO_GTPase_Effectors	Plk1;Ska1;S100a9;Birc5;Nuf2;Sgo2a;Tuba4a;Cenpf;Bub1;Cenpn;Aurkb;Diaph3;Kif2c;Kif18a;Kntc1;Cenpi;Cdc20;Cdca8;Tubb4b;S100a8;Sgo1;Spc24;Iqgap3;Prc1;Kif14;Bub1b;Cenpk;Cit;Cdc25c;Cenpe;
R-MMU-5693571	61	16	1.76751	9.05228	9.75191e-12	8.88215e-11	Nonhomologous_End-Joining_(NHEJ)	H3c8;H2bc6;H2bc7;H2bc8;H2bc11;H2bu2;H2bc12;H4c8;H4c11;H2ax;H2bc9;H3c11;H4c4;H4c1;H2bc13;H3c10;
R-MMU-73894	307	34	8.33516	4.07911	1.06439e-11	9.43946e-11	DNA_Repair	H2ac4;Neil3;H4c1;Pclaf;H3c10;H2bc13;H4c11;H3c8;Ccna2;Clspn;H2bu2;H2bc7;H2bc6;Rad51ap1;H2ac15;H4c4;H2bc9;H2ax;H2bc12;Blm;Fanci;H2bc11;Lig1;H2bc8;Rad23a;H2ac8;Chek1;Ube2l6;H2ac7;Isg15;Dtl;H4c8;Fancd2;H3c11;
R-MMU-983231	120	21	2.84736	7.37524	2.40203e-11	2.02371e-10	Factors_involved_in_megakaryocyte_development_and_platelet_production	Kif11;Prkar2b;Kif4;Cenpe;Kif22;H3c15;Tuba4a;H3c8;H3c4;Kif18a;H3c10;Gata1;Kifc1;Kif2c;H3c11;Kif15;Kif23;Nfe2;Kif18b;H3c7;Tubb4b;
R-MMU-5693567	120	21	3.436	6.11175	2.40203e-11	2.02371e-10	HDR_through_Homologous_Recombination_(HRR)_or_Single_Strand_Annealing_(SSA)	Blm;H4c8;H2bu2;H2bc11;H2bc8;H2bc7;H2bc6;H3c10;Rad51ap1;H2bc13;H3c11;H4c4;H2bc9;H2ax;H4c11;H2bc12;Ccna2;H3c8;Chek1;Clspn;H4c1;
R-MMU-5693538	123	21	3.0308	6.92886	3.91722e-11	3.21976e-10	Homology_Directed_Repair	H3c8;Ccna2;H4c11;H2ax;H2bc12;H4c1;Clspn;Chek1;H2bc11;H2bu2;H2bc7;H2bc6;H2bc8;Blm;H4c8;H2bc9;H4c4;H3c11;H2bc13;H3c10;Rad51ap1;
R-MMU-9018519	90	18	2.577	6.98486	6.6755e-11	5.35629e-10	Estrogen-dependent_gene_expression	H3c8;H3c15;H2bc12;H4c11;H4c1;H2bc8;H2bc7;H2bc6;H2bu2;H2bc11;H4c8;H3c7;H2bc13;H3c11;H4c4;H2bc9;H3c4;H3c10;
R-MMU-2467813	182	25	5.10746	4.8948	7.0352e-11	5.51363e-10	Separation_of_Sister_Chromatids	Plk1;Nuf2;Birc5;Cdca5;Ska1;Ube2c;Sgo2a;Cenpn;Bub1;Cenpf;Tuba4a;Cenpi;Cdc20;Kntc1;Kif18a;Kif2c;Aurkb;Spc24;Sgo1;Tubb4b;Cdca8;Cenpk;Bub1b;Espl1;Cenpe;
R-MMU-5693565	73	16	2.09023	7.65464	1.85676e-10	1.42211e-09	Recruitment_and_ATM-mediated_phosphorylation_of_repair_and_signaling_proteins_at_DNA_double_strand_breaks	H3c10;H2bc13;H3c11;H4c4;H2bc9;H4c8;H2bc8;H2bc7;H2bc6;H2bu2;H2bc11;H4c1;H2bc12;H2ax;H4c11;H3c8;
R-MMU-5693606	74	16	0.98768	16.1996	2.30829e-10	1.72865e-09	DNA_Double_Strand_Break_Response	H3c10;H3c11;H4c4;H2bc9;H2bc13;H4c8;H2bu2;H2bc11;H2bc7;H2bc6;H2bc8;H4c1;H2ax;H4c11;H2bc12;H3c8;
R-MMU-194315	366	35	7.13963	4.90221	3.23468e-10	2.36976e-09	Signaling_by_Rho_GTPases	Ska1;Sgo2a;Cenpi;Ect2;Aurkb;Kif2c;S100a8;Spc24;Prc1;Cdca8;Tubb4b;Arhgap11a;Bub1b;Cdc25c;Depdc1b;Plk1;Birc5;Nuf2;S100a9;Itsn1;Cenpn;Tuba4a;Cenpf;Bub1;Kif18a;Kntc1;Cdc20;Diaph3;Sgo1;Iqgap3;Ccne1;Cenpk;Kif14;Cenpe;Cit;
R-MMU-189451	13	8	0.120123	66.5984	5.05813e-10	3.62679e-09	Heme_biosynthesis	Alas2;Uros;Alad;Urod;Abcg2;Cpox;Hmbs;Ppox;
R-MMU-176417	6	6	0.1718	34.9243	5.58602e-10	3.92185e-09	Phosphorylation_of_Emi1	Fbxo5;Fzr1;Cdk1;Ccnb1;Cdc20;Plk1;
R-MMU-3247509	202	25	5.62263	4.44632	6.80487e-10	4.58648e-09	Chromatin_modifying_enzymes	H3c15;H2ac4;H2bc12;Brpf3;H4c1;H2bc8;H2bc11;H2bc14;H3c7;H2bc13;H3c4;H3c10;H3c8;H2ac8;H4c11;H2ac7;H2aw;H2bc6;H2bc7;H2bu2;H4c8;H2bc9;H3c11;H4c4;H2ac15;
R-MMU-4839726	202	25	5.78394	4.32231	6.80487e-10	4.58648e-09	Chromatin_organization	H2aw;H2ac7;H4c11;H2ac8;H3c8;H2ac15;H3c11;H4c4;H2bc9;H4c8;H2bu2;H2bc6;H2bc7;H4c1;Brpf3;H2ac4;H2bc12;H3c15;H3c4;H3c10;H2bc13;H3c7;H2bc14;H2bc11;H2bc8;
R-MMU-8878171	204	25	4.16564	6.00148	8.39957e-10	5.5503e-09	Transcriptional_regulation_by_RUNX1	H2bu2;H2bc6;H2bc7;H4c8;H4c4;H3c11;H2bc9;H2ac15;H3c8;H4c11;H2ac8;H2ac7;H2bc11;H2bc8;H3c7;H2bc13;Gata1;Tal1;H3c10;H3c4;H3c15;H2ax;H2bc12;H2ac4;H4c1;
R-MMU-3214858	71	15	1.45791	10.2887	1.21101e-09	7.8483e-09	RMTs_methylate_histone_arginines	H2ac7;H2aw;H4c1;H2ac8;H2ac4;H4c11;H3c8;H3c15;H3c4;H3c10;H2ac15;H4c4;H3c11;H4c8;H3c7;
R-MMU-5693532	149	21	2.29466	9.15168	1.56177e-09	9.93053e-09	DNA_Double-Strand_Break_Repair	Ccna2;H3c8;H4c11;Clspn;Chek1;H2bu2;H2bc6;H2bc7;H4c8;H2bc9;H3c11;H4c4;Rad51ap1;H2ax;H2bc12;H4c1;H2bc11;H2bc8;Blm;H2bc13;H3c10;
R-MMU-983189	52	12	1.49487	8.02747	1.99158e-08	1.24289e-07	Kinesins	Cenpe;Kif22;Kif18b;Tubb4b;Tuba4a;Kif11;Kif18a;Kifc1;Kif2c;Kif4;Kif15;Kif23;
R-MMU-6791312	34	10	0.752453	13.2899	2.48454e-08	1.52235e-07	TP53_Regulates_Transcription_of_Cell_Cycle_Genes	Ccnb1;Cdk1;Aurka;Gadd45a;E2f7;Cdc25c;E2f8;Ccne2;Ccna2;Ccne1;
R-MMU-189445	26	9	0.634725	14.1794	2.53849e-08	1.52763e-07	Metabolism_of_porphyrins	Uros;Alas2;Blvrb;Alad;Urod;Hmbs;Cpox;Abcg2;Ppox;
R-MMU-176408	29	9	0.830367	10.8386	7.539e-08	4.45727e-07	Regulation_of_APC/C_activators_between_G1/S_and_early_anaphase	Ccna2;Fbxo5;Bub1b;Plk1;Cdk1;Fzr1;Ube2c;Cdc20;Ccnb1;
R-MMU-2262752	418	33	10.5382	3.13146	1.25566e-07	7.29579e-07	Cellular_responses_to_stress	H2bc7;H2bc6;H2bu2;Ccne2;H2ac15;H1f3;H2bc9;H4c4;H4c11;H3c8;Tuba4a;Ccna2;Ube2c;Ccne1;H3c10;H1f4;H2bc13;H2ac4;Gpx1;H4c1;H4c8;H3c11;Prdx2;H2ac8;H2ac7;H1f5;H2bc8;Tubb4b;H2bc11;Txnrd2;H2bc12;Fzr1;H2ax;
R-MMU-8953897	420	33	8.72006	3.78438	1.40521e-07	8.02634e-07	Cellular_responses_to_external_stimuli	H2bc7;H2bc6;H2bu2;Ccne2;H1f3;H2bc9;H4c4;H2ac15;Ccna2;H3c8;Tuba4a;H4c11;Ube2c;Ccne1;H1f4;H2bc13;H3c10;Gpx1;H2ac4;H4c1;H4c8;H3c11;H2ac8;Prdx2;H2ac7;Tubb4b;H2bc8;H1f5;H2bc11;Txnrd2;Fzr1;H2bc12;H2ax;
R-MMU-8939211	159	19	0.598563	31.7427	1.4679e-07	8.24468e-07	ESR-mediated_signaling	H4c4;H3c11;H2bc9;H4c8;H2bu2;H2bc6;H2bc7;Mmp9;H4c11;H3c8;H3c10;H3c4;H2bc13;H3c7;H2bc11;H2bc8;H4c1;H2bc12;H3c15;
R-MMU-3214842	45	10	1.2885	7.76096	4.56284e-07	2.52078e-06	HDMs_demethylate_histones	H3c4;H3c10;H4c4;H4c1;H3c11;H4c8;H3c7;H4c11;H3c8;H3c15;
R-MMU-6799990	4	4	0.065252	61.3008	6.88842e-07	3.74419e-06	Metal_sequestration_by_antimicrobial_proteins	S100a8;Lcn2;Ltf;S100a9;
R-MMU-453274	178	19	4.28451	4.43458	8.66433e-07	4.63473e-06	Mitotic_G2-G2/M_phases	Plk1;Optn;Tuba4a;Ccna2;E2f1;Cdc25b;Prkar2b;Cep76;Nek2;Tubb4b;Ccnb2;Aurka;Gtse1;Tpx2;Hmmr;Ninl;Cdc25c;Cdk1;Ccnb1;
R-MMU-69273	22	7	0.629934	11.1123	1.85561e-06	9.77092e-06	Cyclin_A/B1/B2_associated_events_during_G2/M_transition	Cdk1;Ccnb1;Ccna2;Plk1;Cdc25b;Ccnb2;Cdc25c;
R-MMU-9006931	208	20	5.95574	3.35811	2.32687e-06	1.20639e-05	Signaling_by_Nuclear_Receptors	H2bc11;H2bc8;H3c7;H2bc13;H3c10;H3c4;H3c15;H2bc12;H4c1;H2bu2;H2bc7;H2bc6;H4c8;H2bc9;H4c4;H3c11;H3c8;Mmp9;H4c11;Aldh1a1;
R-MMU-69275	176	18	5.05955	3.55763	3.15228e-06	1.60958e-05	G2/M_Transition	Optn;Ccna2;Tuba4a;Cdc25b;Prkar2b;Plk1;Tpx2;Hmmr;Cdc25c;Ninl;Cdk1;Ccnb1;Nek2;Cep76;Tubb4b;Ccnb2;Aurka;Gtse1;
R-MMU-2980767	5	4	0.121492	32.924	3.3656e-06	1.69284e-05	Activation_of_NIMA_Kinases_NEK9,_NEK6,_NEK7	Ccnb1;Plk1;Ccnb2;Cdk1;
R-MMU-6804116	10	5	0.286334	17.4621	4.39411e-06	2.17767e-05	TP53_Regulates_Transcription_of_Genes_Involved_in_G1_Cell_Cycle_Arrest	Ccna2;Ccne2;E2f7;Ccne1;E2f8;
R-MMU-2565942	84	12	2.43395	4.93026	4.78306e-06	2.33607e-05	Regulation_of_PLK1_Activity_at_G2/M_Transition	Aurka;Plk1;Nek2;Cep76;Ccnb2;Tubb4b;Ccnb1;Cdk1;Prkar2b;Optn;Ninl;Tuba4a;
R-MMU-453276	85	12	2.13324	5.62524	5.42794e-06	2.54058e-05	Regulation_of_mitotic_cell_cycle	Fbxo5;Nek2;Aurkb;Plk1;Cdc20;Aurka;Ccna2;Fzr1;Bub1b;Ccnb1;Ube2c;Cdk1;
R-MMU-174143	85	12	2.33687	5.13507	5.42794e-06	2.54058e-05	APC/C-mediated_degradation_of_cell_cycle_proteins	Fbxo5;Nek2;Plk1;Aurkb;Cdc20;Aurka;Ccna2;Fzr1;Bub1b;Ccnb1;Ube2c;Cdk1;
R-MMU-8854518	71	11	2.04107	5.38933	5.34984e-06	2.54058e-05	AURKA_Activation_by_TPX2	Cep76;Nek2;Tubb4b;Aurka;Plk1;Tpx2;Ninl;Tuba4a;Hmmr;Cdk1;Prkar2b;
R-MMU-3214841	62	10	1.72576	5.79455	9.96667e-06	4.60105e-05	PKMTs_methylate_histone_lysines	H3c8;H3c15;H4c8;H3c7;H4c11;H4c4;H4c1;H3c11;H3c4;H3c10;
R-MMU-6811434	91	12	2.4084	4.98257	1.11561e-05	5.08056e-05	COPI-dependent_Golgi-to-ER_retrograde_traffic	Kif22;Cenpe;Tuba4a;Kif11;Kif4;Kif18b;Tubb4b;Kif18a;Kif2c;Kifc1;Kif23;Kif15;
R-MMU-109582	504	33	11.9589	2.75944	1.22355e-05	5.49784e-05	Hemostasis	Gp1bb;Arrb1;H3c11;Kif23;Cd177;Ppbp;Kif18b;Bsg;Vwf;Kif2c;Kif15;Tubb4b;Slc7a5;H3c7;Prkar2b;Pf4;Kif11;Tuba4a;H3c8;Kifc1;Slc16a1;Atp2b4;Kif4;H3c15;Cenpe;Brpf3;Kif22;Gata1;P2ry1;H3c4;H3c10;Kif18a;Nfe2;
R-MMU-6804114	7	4	0.185261	21.5912	2.24973e-05	9.97578e-05	TP53_Regulates_Transcription_of_Genes_Involved_in_G2_Cell_Cycle_Arrest	Gadd45a;Aurka;Ccnb1;Cdk1;
R-MMU-1266695	25	6	0.715834	8.38183	6.21467e-05	0.000271993	Interleukin-7_signaling	H3c8;H3c15;H3c11;H3c10;H3c7;H3c4;
R-MMU-2132295	131	13	3.00377	4.3279	0.000103341	0.000446486	MHC_class_II_antigen_presentation	Kif15;Kif2c;Kif18a;Tubb4b;Kif4;Cenpe;Kif22;Ctse;Kif23;Kifc1;Kif18b;Kif11;Tuba4a;
R-MMU-388396	993	11	28.4329	0.386875	0.000114577	0.000488764	GPCR_downstream_signalling	Gpsm2;Itsn1;Prkar2b;Pf4;Ect2;Metap2;Arrb1;Ppbp;P2ry1;Fpr2;Prokr1;
R-MMU-556833	594	4	8.47023	0.472242	0.000187988	0.0007919	Metabolism_of_lipids	Ptdss2;Pcyt1b;Pip5k1b;Gpx1;
R-MMU-69306	123	12	3.5219	3.40725	0.000223837	0.000931273	DNA_Replication	E2f2;Cdc45;Ube2c;Gins1;Fzr1;E2f1;Ccna2;Ccne1;Cdc6;Lig1;Mcm2;Ccne2;
R-MMU-69478	5	3	0.100958	29.7153	0.000230276	0.00094638	G2/M_DNA_replication_checkpoint	Ccnb2;Ccnb1;Cdk1;
R-MMU-8856688	124	12	0.183892	65.2557	0.000241557	0.00098078	Golgi-to-ER_retrograde_transport	Cenpe;Kif22;Tuba4a;Kif11;Kif4;Kif18b;Tubb4b;Kif18a;Kifc1;Kif2c;Kif15;Kif23;
R-MMU-2168880	21	5	0.455168	10.985	0.000273035	0.00109539	Scavenging_of_heme_from_plasma	Hp;Apol11b;Hbb-bt;Apol10a;Apol11a;
R-MMU-212436	830	42	23.1029	1.81795	0.000292165	0.00115835	Generic_Transcription_Pathway	Tal1;H2ac4;Gadd45a;Ccne2;H4c4;H2bc9;H4c11;H3c8;Blm;H2bc11;E2f7;H2bc12;Prdx2;Steap3;Chek1;Ccne1;Aurka;H3c10;H3c4;H2bc13;Gata1;Brpf3;H3c15;E2f8;Ccnb1;H4c1;H2bu2;H2bc7;H2bc6;H2ac15;Ccna2;H3c7;H2bc8;Aurkb;H2ax;Tpx2;Cdc25c;Cdk1;H4c8;H3c11;H2ac8;H2ac7;
R-MMU-176187	34	6	0.934748	6.41884	0.000379208	0.00148596	Activation_of_ATR_in_response_to_replication_stress	Mcm2;Cdc25c;Cdc6;Clspn;Chek1;Cdc45;
R-MMU-372790	1024	13	27.4515	0.473562	0.000465132	0.00180172	Signaling_by_GPCR	P2ry1;Ccrl2;Xk;Itsn1;Metap2;Ect2;Arrb1;Fpr2;Prokr1;Gpsm2;Prkar2b;Pf4;Ppbp;
R-MMU-380284	68	8	1.89277	4.22661	0.000731269	0.00276896	Loss_of_proteins_required_for_interphase_microtubule_organization_from_the_centrosome	Tubb4b;Cep76;Nek2;Plk1;Tuba4a;Ninl;Prkar2b;Cdk1;
R-MMU-380259	68	8	1.94707	4.10874	0.000731269	0.00276896	Loss_of_Nlp_from_mitotic_centrosomes	Plk1;Cep76;Nek2;Tubb4b;Cdk1;Prkar2b;Ninl;Tuba4a;
R-MMU-8866654	53	7	0.767853	9.11633	0.000779128	0.0029174	E3_ubiquitin_ligases_ubiquitinate_target_proteins	H2bc11;H2bc8;H2bc7;H2bc6;H2bc12;H2bc13;H2bc9;
R-MMU-68881	2	2	0.052475	38.1134	0.000836375	0.00309734	Mitotic_Metaphase/Anaphase_Transition	Plk1;Fbxo5;
R-MMU-69242	143	12	4.11088	2.91908	0.000886531	0.0032474	S_Phase	Lig1;Cdc6;Ccne1;Fzr1;Esco2;Mcm2;Ccne2;Cdca5;Gins1;Ube2c;Ccna2;Cdc25b;
R-MMU-8852135	73	8	2.02361	3.95332	0.00117435	0.00425544	Protein_ubiquitination	H2bc12;Ube2c;H2bc8;H2bc7;H2bc6;H2bc11;H2bc13;H2bc9;
R-MMU-1247673	8	3	0.202601	14.8074	0.00120854	0.00428715	Erythrocytes_take_up_oxygen_and_release_carbon_dioxide	Car2;Hbb-bt;Aqp1;
R-MMU-5625900	8	3	0.215378	13.929	0.00120854	0.00428715	RHO_GTPases_activate_CIT	Kif14;Prc1;Cit;
R-MMU-2995383	18	4	0.521561	7.66929	0.00152855	0.00534219	Initiation_of_Nuclear_Envelope_(NE)_Reformation	Cdk1;Ccnb1;Lmna;Ccnb2;
R-MMU-6798695	514	28	14.8935	1.88002	0.00153766	0.00534219	Neutrophil_degranulation	S100a9;Alad;Mmp9;Fpr2;Mettl7a1;Cd177;Tubb4b;S100a8;Mmp25;Elane;Camp;Ltf;Slpi;Hbb-bt;Mmp8;Prg2;Ppbp;Svip;Ms4a3;Ctsg;Fcgr4;Naprt;Hp;Mpo;Fcnb;Abca13;Lcn2;Stom;
R-MMU-380287	77	8	2.21355	3.6141	0.00166455	0.00560952	Centrosome_maturation	Tuba4a;Ninl;Prkar2b;Cdk1;Tubb4b;Nek2;Cep76;Plk1;
R-MMU-380270	77	8	2.23112	3.58564	0.00166455	0.00560952	Recruitment_of_mitotic_centrosome_proteins_and_complexes	Tuba4a;Ninl;Prkar2b;Cdk1;Tubb4b;Cep76;Nek2;Plk1;
R-MMU-176814	77	8	2.23112	3.58564	0.00166455	0.00560952	Activation_of_APC/C_and_APC/C:Cdc20_mediated_degradation_of_mitotic_proteins	Ccna2;Cdk1;Ube2c;Ccnb1;Bub1b;Nek2;Cdc20;Plk1;
R-MMU-176412	20	4	0.524755	7.62261	0.00231241	0.00771567	Phosphorylation_of_the_APC/C	Plk1;Ccnb1;Ube2c;Cdk1;
R-MMU-68689	10	3	0.143737	20.8715	0.00248049	0.00819536	CDC6_association_with_the_ORC:origin_complex	Cdc6;E2f2;E2f1;
R-MMU-2173782	34	5	0.841661	5.94063	0.00274606	0.00898468	Binding_and_Uptake_of_Ligands_by_Scavenger_Receptors	Hp;Apol11a;Hbb-bt;Apol11b;Apol10a;
R-MMU-3700989	281	17	7.75747	2.19144	0.00349462	0.0113239	Transcriptional_Regulation_by_TP53	Ccna2;Ccne2;Brpf3;E2f8;Ccnb1;Gadd45a;Ccne1;Aurka;Prdx2;Steap3;Chek1;Tpx2;Cdc25c;Cdk1;Blm;E2f7;Aurkb;
R-MMU-5689901	36	5	0.969199	5.1589	0.00354962	0.0113926	Metalloprotease_DUBs	H2aw;H2ac7;H2ac15;H2ac8;H2ac4;
R-MMU-380320	88	8	2.51973	3.17494	0.00387246	0.0123115	Recruitment_of_NuMA_to_mitotic_centrosomes	Plk1;Nek2;Cep76;Tubb4b;Cdk1;Prkar2b;Tuba4a;Ninl;
R-MMU-1480926	12	3	0.277892	10.7956	0.00435629	0.0133461	O2/CO2_exchange_in_erythrocytes	Aqp1;Hbb-bt;Car2;
R-MMU-1237044	12	3	0.29295	10.2407	0.00435629	0.0133461	Erythrocytes_take_up_carbon_dioxide_and_release_oxygen	Aqp1;Hbb-bt;Car2;
R-MMU-75035	12	3	0.334018	8.98155	0.00435629	0.0133461	Chk1/Chk2(Cds1)_mediated_inactivation_of_Cyclin_B:Cdk1_complex	Cdc25c;Ccnb1;Cdk1;
R-MMU-140342	12	3	0.3436	8.73108	0.00435629	0.0133461	Apoptosis_induced_DNA_fragmentation	H1f3;H1f4;H1f5;
R-MMU-174048	24	4	0.629706	6.35217	0.00463111	0.0140602	APC/C:Cdc20_mediated_degradation_of_Cyclin_B	Ccnb1;Cdc20;Cdk1;Ube2c;
R-MMU-156711	4	2	0.086699	23.0683	0.00482792	0.0143983	Polo-like_kinase_mediated_events	Cdc25c;Plk1;
R-MMU-69200	4	2	0.114533	17.4622	0.00482792	0.0143983	Phosphorylation_of_proteins_involved_in_G1/S_transition_by_active_Cyclin_E:Cdk2_complexes	Ccne2;Ccne1;
R-MMU-9006934	399	3	9.83162	0.305138	0.00525948	0.0155478	Signaling_by_Receptor_Tyrosine_Kinases	Chek1;Ranbp10;Mmp9;
R-MMU-73857	948	42	27.4689	1.529	0.00531254	0.015568	RNA_Polymerase_II_Transcription	Ccne1;H3c4;Aurka;H3c10;Gata1;H2bc13;Brpf3;E2f8;H3c15;Ccnb1;H4c1;H2bu2;H2bc7;H2bc6;H2ac15;Ccna2;H3c7;H2bc8;Aurkb;H2ax;Tpx2;Cdc25c;Cdk1;H4c8;H3c11;H2ac8;H2ac7;Tal1;H2ac4;Gadd45a;Ccne2;H2bc9;H4c4;H4c11;H3c8;Blm;E2f7;H2bc11;H2bc12;Prdx2;Steap3;Chek1;
R-MMU-6811442	178	12	4.93429	2.43196	0.00553729	0.0160868	Intra-Golgi_and_retrograde_Golgi-to-ER_traffic	Kif11;Tuba4a;Kif23;Kifc1;Kif18b;Kif4;Cenpe;Kif22;Kif18a;Kif15;Kif2c;Tubb4b;
R-MMU-8852276	75	7	1.83094	3.82318	0.0058562	0.0168678	The_role_of_GTSE1_in_G2/M_progression_after_G2_checkpoint	Ccnb1;Cdk1;Tuba4a;Gtse1;Plk1;Ccnb2;Tubb4b;
R-MMU-69239	115	9	1.78417	5.04437	0.00607435	0.0173479	Synthesis_of_DNA	Mcm2;Ccne2;Lig1;Cdc6;Ccne1;Ccna2;Fzr1;Gins1;Ube2c;
R-MMU-5620912	95	8	2.38421	3.35541	0.0061613	0.0174484	Anchoring_of_the_basal_body_to_the_plasma_membrane	Nek2;Cep76;Tubb4b;Plk1;Ninl;Tuba4a;Cdk1;Prkar2b;
R-MMU-179409	26	4	0.533881	7.49231	0.00622712	0.0174878	APC-Cdc20_mediated_degradation_of_Nek2A	Bub1b;Cdc20;Nek2;Ube2c;
R-MMU-176409	76	7	1.60392	4.3643	0.00629518	0.0175329	APC/C:Cdc20_mediated_degradation_of_mitotic_proteins	Bub1b;Ccnb1;Ube2c;Cdk1;Ccna2;Cdc20;Nek2;
R-MMU-4419969	14	3	0.38809	7.73017	0.00690538	0.0190747	Depolymerisation_of_the_Nuclear_Lamina	Lmna;Cdk1;Ccnb1;
R-MMU-68911	5	2	0.144878	13.8047	0.00789302	0.0216256	G2_Phase	Ccna2;E2f1;
R-MMU-2559584	16	3	0.346794	8.65067	0.0101794	0.0274436	Formation_of_Senescence-Associated_Heterochromatin_Foci_(SAHF)	H1f5;H1f3;H1f4;
R-MMU-1538133	16	3	0.458134	6.5483	0.0101794	0.0274436	G0_and_Early_G1	Ccne2;Ccna2;Ccne1;
R-MMU-2995410	65	6	1.72028	3.4878	0.0110497	0.0295536	Nuclear_Envelope_(NE)_Reassembly	Tubb4b;Ccnb2;Tuba4a;Lmna;Cdk1;Ccnb1;
R-MMU-75153	47	5	0.670203	7.46043	0.0111666	0.029631	Apoptotic_execution_phase	H1f4;H1f3;Lmna;Clspn;H1f5;
R-MMU-433692	6	2	0.172485	11.5952	0.0116142	0.030578	Proton-coupled_monocarboxylate_transport	Slc16a1;Bsg;
R-MMU-352230	31	4	0.859343	4.65472	0.0117079	0.0305858	Amino_acid_transport_across_the_plasma_membrane	Slc43a1;Slc16a10;Slc7a5;Slc6a20a;
R-MMU-2980766	48	5	1.21013	4.13179	0.0121782	0.0315695	Nuclear_Envelope_Breakdown	Lmna;Plk1;Cdk1;Ccnb1;Ccnb2;
R-MMU-597592	1242	50	35.7043	1.40039	0.0134702	0.0346523	Post-translational_protein_modification	St3gal5;Fn3krp;Yod1;Tuba4a;H2bc9;H2bc11;Asb1;H2aw;Top2a;H2bc13;Brca1;Clspn;Ube2c;H2bc7;H2bc6;B3gnt3;Birc5;H2bc8;Tubb4b;Spta1;Rad23a;H2ac4;Fbxo30;Ccnf;Cdc20;H4c11;Apol11a;Pigq;H4c4;H2bc12;Apol11b;Cdca8;Fcgr4;Blm;Otub2;Arrb1;Dtl;Cmas;Ank1;H4c1;Ccna2;Apol10a;H2ac15;Cdk1;Josd2;Aurkb;H2ac8;Art4;H2ac7;H4c8;
R-MMU-3108232	154	10	3.84736	2.59918	0.0139505	0.0356161	SUMO_E3_ligases_SUMOylate_target_proteins	Birc5;H4c8;Top2a;H4c4;H4c11;Brca1;Blm;Cdca8;Aurkb;H4c1;
R-MMU-69052	90	7	2.577	2.71633	0.0153197	0.0388177	Switching_of_origins_to_a_post-replicative_state	Ube2c;Ccna2;Fzr1;Mcm2;Ccne2;Ccne1;Cdc6;
R-MMU-445095	7	2	0.194045	10.3069	0.0159511	0.0401159	Interaction_between_L1_and_Ankyrins	Ank1;Spta1;
R-MMU-156590	34	4	0.663244	6.03096	0.0161314	0.0402688	Glutathione_conjugation	Chac2;Gclm;Mgst3;Gstm5;
R-MMU-5688426	241	14	6.98312	2.00483	0.0166643	0.0412932	Deubiquitination	Clspn;H2ac7;H2aw;Ccna2;Arrb1;H2ac8;Rad23a;H2ac15;Cdk1;H2ac4;Josd2;Cdc20;Otub2;Yod1;
R-MMU-6803157	93	7	2.67351	2.61828	0.0180677	0.0444438	Antimicrobial_peptides	Elane;S100a8;S100a9;Lcn2;Ctsg;Ltf;Camp;
R-MMU-69017	73	6	2.03194	2.95284	0.0188281	0.0459788	CDK-mediated_phosphorylation_and_removal_of_Cdc6	Cdc6;Ccne1;Ccne2;Fzr1;Ccna2;Ube2c;
R-MMU-176407	20	3	0.554415	5.41111	0.0190327	0.0461441	Conversion_from_APC/C:Cdc20_to_APC/C:Cdh1_in_late_anaphase	Cdc20;Fzr1;Ube2c;
R-MMU-140877	36	4	1.04312	3.83465	0.0195915	0.0471596	Formation_of_Fibrin_Clot_(Clotting_Cascade)	Vwf;Pf4;Gp1bb;Cd177;
R-MMU-179419	74	6	2.11887	2.8317	0.0200094	0.047487	APC:Cdc20_mediated_degradation_of_cell_cycle_proteins_prior_to_satisfation_of_the_cell_cycle_checkpoint	Nek2;Cdc20;Ccna2;Cdk1;Ube2c;Bub1b;
R-MMU-174178	74	6	2.12731	2.82046	0.0200094	0.047487	APC/C:Cdh1_mediated_degradation_of_Cdc20_and_other_APC/C:Cdh1_targeted_proteins_in_late_mitosis/early_G1	Fzr1;Ube2c;Aurka;Cdc20;Plk1;Aurkb;
R-MMU-2514853	8	2	0.223591	8.9449	0.0208653	0.0491721	Condensation_of_Prometaphase_Chromosomes	Ncaph;Ncapg;
R-MMU-141405	21	3	0.519849	5.77091	0.0217395	0.0505255	Inhibition_of_the_proteolytic_activity_of_APC/C_required_for_the_onset_of_anaphase_by_mitotic_spindle_checkpoint_components	Cdc20;Ube2c;Bub1b;
R-MMU-141430	21	3	0.6013	4.98919	0.0217395	0.0505255	Inactivation_of_APC/C_via_direct_inhibition_of_the_APC/C_complex	Ube2c;Cdc20;Bub1b;
R-MMU-917937	56	5	1.3096	3.81794	0.0225657	0.0517323	Iron_uptake_and_transport	Abcg2;Tfr2;Lcn2;Tfrc;Steap3;
R-MMU-425366	76	6	2.11545	2.83628	0.0225211	0.0517323	Transport_of_bile_salts_and_organic_acids,_metal_ions_and_amine_compounds	Bsg;Slc6a9;Slc22a4;Slc14a1;Slc16a1;Slc6a20a;
R-MMU-1592389	57	5	1.6321	3.06354	0.0241704	0.0550366	Activation_of_Matrix_Metalloproteinases	Elane;Mmp25;Mmp9;Ctsg;Mmp8;
R-MMU-2990846	159	10	4.57084	2.18778	0.0260443	0.0589056	SUMOylation	Birc5;H4c8;Top2a;H4c4;H4c11;Brca1;Blm;Cdca8;Aurkb;H4c1;
R-MMU-6804756	79	6	2.26204	2.65248	0.0266736	0.0596055	Regulation_of_TP53_Activity_through_Phosphorylation	Aurka;Aurkb;Blm;Chek1;Tpx2;Ccna2;
R-MMU-112316	323	3	9.35911	0.320543	0.0267075	0.0596055	Neuronal_System	Epb41;Prkar2b;Kcnj5;
R-MMU-210991	23	3	0.608715	4.92842	0.0277499	0.0615244	Basigin_interactions	Slc16a1;Slc7a5;Bsg;
R-MMU-74160	1046	42	24.3422	1.7254	0.0299967	0.065923	Gene_expression_(Transcription)	Gata1;H3c10;H3c4;Ccne1;H4c1;E2f8;Brpf3;H2ac15;H2bu2;Ccna2;Aurkb;H3c7;Cdk1;Cdc25c;Tpx2;H2ax;H3c11;H4c8;H2ac7;H2ac8;Gadd45a;H2ac4;H4c4;H4c11;Blm;H2bc12;H2bc13;Aurka;Ccnb1;H3c15;H2bc7;H2bc6;H2bc8;Tal1;H2bc9;Ccne2;H3c8;H2bc11;E2f7;Chek1;Steap3;Prdx2;
R-MMU-4615885	41	4	1.188	3.36701	0.030125	0.065923	SUMOylation_of_DNA_replication_proteins	Birc5;Cdca8;Top2a;Aurkb;
R-MMU-168256	1573	59	45.2197	1.30474	0.0306703	0.0666831	Immune_System	Prg2;Mmp8;Svip;Ms4a3;Fcgr4;Naprt;Mpo;Hp;Fcnb;Abca13;Stom;Ltf;Cdc20;Cenpe;Fbxo30;Ccnf;Kif18b;H3c11;Cd177;Isg15;H3c7;S100a8;Kif15;Ctse;Ube2o;Mmp9;H3c4;H3c10;Kif18a;Mettl7a1;Kif22;Ppbp;Kif23;Ctsg;Ube2l6;Ubac1;Kif2c;Asb1;Fzr1;Il1rl1;Lcn2;H3c8;Tuba4a;Slpi;Hbb-bt;Tubb4b;Mmp25;Elane;Camp;S100a9;Kifc1;Bcl2l1;Alad;Ube2c;Kif11;Fpr2;Tnfrsf14;H3c15;Kif4;
R-MMU-453279	127	8	2.97	2.6936	0.0310391	0.0670525	Mitotic_G1_phase_and_G1/S_transition	Cdc45;E2f2;Ccna2;E2f1;Cdc6;Ccne1;Mcm2;Ccne2;
R-MMU-69231	42	4	0.780972	5.12182	0.0325636	0.068587	Cyclin_D_associated_events_in_G1	E2f2;Ccne2;E2f1;Ccne1;
R-MMU-69236	42	4	0.886379	4.51274	0.0325636	0.068587	G1_Phase	Ccne1;E2f1;Ccne2;E2f2;
R-MMU-75892	10	2	0.278348	7.18525	0.0322798	0.068587	Platelet_Adhesion_to_exposed_collagen	Gp1bb;Vwf;
R-MMU-2468052	10	2	0.279489	7.15592	0.0322798	0.068587	Establishment_of_Sister_Chromatid_Cohesion	Esco2;Cdca5;
R-MMU-373760	63	5	1.74641	2.86302	0.0353355	0.0739632	L1CAM_interactions	Spta1;Tuba4a;Tubb4b;Kif4;Ank1;
R-MMU-180786	44	4	1.15446	3.46482	0.037778	0.0785876	Extension_of_Telomeres	Ccna2;Lig1;Blm;Pif1;
R-MMU-1362409	11	2	0.267283	7.48271	0.0387113	0.0785886	Mitochondrial_iron-sulfur_cluster_biogenesis	Glrx5;Isca1;
R-MMU-432047	11	2	0.278576	7.17937	0.0387113	0.0785886	Passive_transport_by_Aquaporins	Aqp1;Aqp9;
R-MMU-430116	11	2	0.291125	6.8699	0.0387113	0.0785886	GP1b-IX-V_activation_signalling	Vwf;Gp1bb;
R-MMU-5689877	11	2	0.308693	6.47893	0.0387113	0.0785886	Josephin_domain_DUBs	Josd2;Rad23a;
R-MMU-73893	46	4	0.734657	5.44472	0.0434442	0.0876687	DNA_Damage_Bypass	Dtl;Ube2l6;Pclaf;Isg15;
R-MMU-174403	12	2	0.332649	6.01234	0.0455823	0.0908949	Glutathione_synthesis_and_recycling	Chac2;Gclm;
R-MMU-68884	12	2	0.344969	5.79762	0.0455823	0.0908949	Mitotic_Telophase/Cytokinesis	Kif23;Plk1;
R-MMU-70268	28	3	0.744239	4.03096	0.046212	0.0916085	Pyruvate_metabolism	Hagh;Bsg;Slc16a1;
R-MMU-5689896	29	3	0.69473	4.31822	0.0504775	0.099479	Ovarian_tumor_domain_proteases	Yod1;Otub2;Cdk1;
R-MMU-5656169	30	3	0.787132	3.8113	0.0549272	0.105774	Termination_of_translesion_DNA_synthesis	Ube2l6;Isg15;Pclaf;
R-MMU-5626467	30	3	0.787132	3.8113	0.0549272	0.105774	RHO_GTPases_activate_IQGAPs	Tubb4b;Tuba4a;Iqgap3;
R-MMU-196807	30	3	0.862423	3.47857	0.0549272	0.105774	Nicotinate_metabolism	Naprt;Nadk2;Nmnat3;
R-MMU-68962	30	3	0.869268	3.45118	0.0549272	0.105774	Activation_of_the_pre-replicative_complex	Cdc6;Cdc45;Mcm2;
R-MMU-69656	73	5	0.574606	8.70162	0.0600678	0.11246	Cyclin_A:Cdk2-associated_events_at_S_phase_entry	Fzr1;Cdc25b;Ccna2;Ccne1;Ccne2;
R-MMU-917977	31	3	0.742642	4.03963	0.0595579	0.11246	Transferrin_endocytosis_and_recycling	Tfrc;Steap3;Tfr2;
R-MMU-174184	73	5	1.93201	2.58798	0.0600678	0.11246	Cdc20:Phospho-APC/C_mediated_degradation_of_Cyclin_A	Ccna2;Bub1b;Ube2c;Cdk1;Cdc20;
R-MMU-71406	51	4	1.4603	2.73916	0.0595803	0.11246	Pyruvate_metabolism_and_Citric_Acid_(TCA)_cycle	Bsg;Fahd1;Slc16a1;Hagh;
R-MMU-3301854	31	3	0.89117	3.36636	0.0595579	0.11246	Nuclear_Pore_Complex_(NPC)_Disassembly	Cdk1;Ccnb1;Ccnb2;
R-MMU-109581	98	6	0.581337	10.321	0.0646763	0.120419	Apoptosis	H1f3;H1f4;Bcl2l1;H1f5;Lmna;Clspn;
R-MMU-5653656	570	24	4.16153	5.76711	0.0687347	0.125321	Vesicle-mediated_transport	Ank1;Kif23;Arrb1;Hp;Kif2c;Apol11b;Optn;Tuba4a;Rab3il1;Apol11a;Itsn1;Hbb-bt;Cenpe;Tfrc;Kif18b;Spta1;Tubb4b;Kif15;Apol10a;Kifc1;Kif11;Kif18a;Kif22;Kif4;
R-MMU-174414	15	2	0.4295	4.65658	0.0685328	0.125321	Processive_synthesis_on_the_C-strand_of_the_telomere	Blm;Lig1;
R-MMU-189483	15	2	0.4295	4.65658	0.0685328	0.125321	Heme_degradation	Blvrb;Abcg2;
R-MMU-5633007	142	8	4.11453	1.94433	0.0688649	0.125321	Regulation_of_TP53_Activity	Ccna2;Chek1;Tpx2;Brpf3;Cdk1;Blm;Aurkb;Aurka;
R-MMU-1257604	226	2	6.54848	0.305414	0.0691682	0.125321	PIP3_activates_AKT_signaling	Il1rl1;Pip5k1b;
R-MMU-3299685	34	3	0.98517	3.04516	0.0744964	0.134253	Detoxification_of_Reactive_Oxygen_Species	Txnrd2;Gpx1;Prdx2;
R-MMU-190840	16	2	0.459959	4.34821	0.076869	0.137792	Microtubule-dependent_trafficking_of_connexons_from_Golgi_to_the_plasma_membrane	Tubb4b;Tuba4a;
R-MMU-437239	35	3	0.774584	3.87305	0.0798108	0.142308	Recycling_pathway_of_L1	Kif4;Tuba4a;Tubb4b;
R-MMU-442660	17	2	0.471253	4.244	0.0855048	0.149301	Na+/Cl-_dependent_neurotransmitter_transporters	Slc6a9;Slc6a20a;
R-MMU-5693579	36	3	1.0308	2.91036	0.0852853	0.149301	Homologous_DNA_Pairing_and_Strand_Exchange	Chek1;Rad51ap1;Blm;
R-MMU-190872	17	2	0.486767	4.10874	0.0855048	0.149301	Transport_of_connexons_to_the_plasma_membrane	Tuba4a;Tubb4b;
R-MMU-5686938	17	2	0.492585	4.06021	0.0855048	0.149301	Regulation_of_TLR_by_endogenous_ligand	S100a9;S100a8;
R-MMU-69002	82	5	2.25439	2.21789	0.0889712	0.154553	DNA_Replication_Pre-Initiation	Cdc6;Mcm2;E2f1;Cdc45;E2f2;
R-MMU-110313	37	3	1.05943	2.8317	0.0909151	0.156318	Translesion_synthesis_by_Y_family_DNA_polymerases_bypasses_lesions_on_DNA_template	Pclaf;Isg15;Ube2l6;
R-MMU-445717	37	3	1.05943	2.8317	0.0909151	0.156318	Aquaporin-mediated_transport	Aqp9;Prkar2b;Aqp1;
R-MMU-195721	222	2	4.7358	0.422315	0.0992085	0.169712	Signaling_by_WNT	Sox6;Pip5k1b;
R-MMU-5689880	179	9	5.12537	1.75597	0.107504	0.182974	Ub-specific_processing_proteases	H2ac8;Ccna2;Arrb1;H2aw;H2ac7;Clspn;H2ac15;H2ac4;Cdc20;
R-MMU-2559582	40	3	1.1499	2.60893	0.108688	0.18406	Senescence-Associated_Secretory_Phenotype_(SASP)	Ube2c;Ccna2;Fzr1;
R-MMU-171319	20	2	0.371891	5.37792	0.112974	0.190361	Telomere_Extension_By_Telomerase	Pif1;Ccna2;
R-MMU-4551638	64	4	1.83254	2.18277	0.114066	0.191245	SUMOylation_of_chromatin_organization_proteins	H4c8;H4c4;H4c11;H4c1;
R-MMU-1474228	137	7	3.59457	1.94738	0.120049	0.20028	Degradation_of_the_extracellular_matrix	Bsg;Capn5;Elane;Mmp25;Mmp9;Ctsg;Mmp8;
R-MMU-69190	21	2	0.44319	4.51274	0.122578	0.201506	DNA_strand_elongation	Lig1;Gins1;
R-MMU-140875	21	2	0.582136	3.43562	0.122578	0.201506	Common_Pathway_of_Fibrin_Clot_Formation	Pf4;Cd177;
R-MMU-140837	21	2	0.608487	3.28684	0.122578	0.201506	Intrinsic_Pathway_of_Fibrin_Clot_Formation	Gp1bb;Vwf;
R-MMU-9006925	252	3	6.92813	0.433017	0.124425	0.20355	Intracellular_signaling_by_second_messengers	Pip5k1b;Prkar2b;Il1rl1;
R-MMU-69206	104	6	2.88296	2.0812	0.127221	0.207118	G1/S_Transition	Cdc45;Ccna2;Cdc6;Ccne1;Ccne2;Mcm2;
R-MMU-68867	67	4	0.924823	4.32515	0.128968	0.207953	Assembly_of_the_pre-replicative_complex	E2f2;E2f1;Cdc6;Mcm2;
R-MMU-69615	67	4	1.92608	2.07676	0.128968	0.207953	G1/S_DNA_Damage_Checkpoints	Ccne2;Ccne1;Chek1;Ccna2;
R-MMU-162582	2353	79	65.4953	1.20619	0.131094	0.210375	Signal_Transduction	Epor;Pip5k1b;H3c7;Vwf;Cdc25c;Aldh1a1;Cenpn;Sppl2b;H3c10;P2ry1;Ccne1;Cenpk;Ska1;Arrb1;Ect2;H2bc12;H4c11;Bub1;Cenpe;Sgo2a;Prokr1;Dusp8;Spta1;H2bc8;Stradb;Ranbp10;Birc5;S100a9;H2bc7;H2bc13;Sgo1;Kif14;H3c15;Ppbp;Chek1;Kif2c;Arhgap11a;H2bc11;Depdc1b;H2bc9;Pf4;Prkar2b;Cenpf;H3c8;Cit;H3c11;H4c8;Xk;Aurkb;Spc24;S100a8;Cdk1;Bub1b;Sox6;Ccrl2;H2bu2;Mmp9;Kntc1;H3c4;Kif18a;Iqgap3;H4c1;Prc1;Metap2;Cdca8;H4c4;It…
R-MMU-112315	199	2	4.88079	0.40977	0.131879	0.21042	Transmission_across_Chemical_Synapses	Kcnj5;Prkar2b;
R-MMU-112409	22	2	0.629934	3.17494	0.132371	0.21042	RAF-independent_MAPK1/3_activation	Cdk1;Dusp8;
R-MMU-5357801	114	6	3.18617	1.88314	0.147377	0.233174	Programmed_Cell_Death	H1f4;H1f3;Bcl2l1;H1f5;Clspn;Lmna;
R-MMU-5668599	24	2	0.443532	4.50926	0.152451	0.238958	RHO_GTPases_Activate_NADPH_Oxidases	S100a9;S100a8;
R-MMU-1266738	462	8	11.6475	0.686843	0.15236	0.238958	Developmental_Biology	Ank1;Spta1;Tubb4b;Reln;Itsn1;Mmp9;Tuba4a;Kif4;
R-MMU-1169408	26	2	0.649555	3.07903	0.173075	0.270029	ISG15_antiviral_mechanism	Isg15;Ube2l6;
R-MMU-9668328	27	2	0.680698	2.93816	0.18355	0.283745	Sealing_of_the_nuclear_envelope_(NE)_by_ESCRT-III	Tuba4a;Tubb4b;
R-MMU-8955332	27	2	0.75462	2.65034	0.18355	0.283745	Carboxyterminal_post-translational_modifications_of_tubulin	Tubb4b;Tuba4a;
R-MMU-380108	53	3	0.979466	3.06289	0.198015	0.304575	Chemokine_receptors_bind_chemokines	Pf4;Ccrl2;Ppbp;
R-MMU-5689603	94	5	1.95163	2.56196	0.198832	0.304575	UCH_proteinases	H2ac15;H2ac4;H2ac8;H2aw;H2ac7;
R-MMU-5693568	29	2	0.671572	2.97809	0.204754	0.309427	Resolution_of_D-loop_Structures_through_Holliday_Junction_Intermediates	Rad51ap1;Blm;
R-MMU-5693537	29	2	0.80721	2.47767	0.204754	0.309427	Resolution_of_D-Loop_Structures	Rad51ap1;Blm;
R-MMU-174417	29	2	0.833676	2.39901	0.204754	0.309427	Telomere_C-strand_(Lagging_Strand)_Synthesis	Blm;Lig1;
R-MMU-432040	30	2	0.8282	2.41488	0.215456	0.322705	Vasopressin_regulates_renal_water_homeostasis_via_Aquaporins	Aqp1;Prkar2b;
R-MMU-1169410	30	2	0.869268	2.30079	0.215456	0.322705	Antiviral_mechanism_by_IFN-stimulated_genes	Ube2l6;Isg15;
R-MMU-382551	651	24	8.16906	2.93791	0.223058	0.332613	Transport_of_small_molecules	Slc22a4;Lcn2;Stom;Car2;Slc43a1;Steap3;Aqp9;Hbb-bt;Slc6a20a;Tfrc;Atp2b4;Prkar2b;Dmtn;Slc7a5;Bsg;Slc6a9;Abcb9;Abcb4;Tfr2;Slc14a1;Aqp1;Slc16a10;Slc16a1;Abcg2;
R-MMU-1430728	1750	43	50.1084	0.85814	0.232896	0.345754	Metabolism	Slc25a21;Odc1;Pip5k1b;Uros;Pnpo;Aldh1a1;Abcg2;Gch1;Nmnat3;Smox;Alas2;Glrx5;Mpst;Ppox;Bpgm;Urod;Nt5c3;Naprt;Blvrb;Rrm2;Slc7a5;Cpox;Isca1;Hmmr;Asns;Bsg;B3gnt3;Alad;Slc16a1;Hagh;Mgst3;Pcyt1b;Ptdss2;Nadk2;Car2;Fahd1;Chac2;Hmbs;Gstm5;Nqo1;Prkar2b;Gclm;Gpx1;
R-MMU-5685942	58	3	1.61442	1.85825	0.236084	0.348769	HDR_through_Homologous_Recombination_(HRR)	Blm;Rad51ap1;Chek1;
R-MMU-190861	32	2	0.890714	2.24539	0.236997	0.348769	Gap_junction_assembly	Tubb4b;Tuba4a;
R-MMU-397014	166	2	4.60164	0.434627	0.244383	0.355327	Muscle_contraction	Tmod1;Atp2b4;
R-MMU-351202	59	3	1.6961	1.76876	0.243853	0.355327	Metabolism_of_polyamines	Nqo1;Smox;Odc1;
R-MMU-202733	108	5	3.10472	1.61045	0.244617	0.355327	Cell_surface_interactions_at_the_vascular_wall	Bsg;Pf4;Slc16a1;Cd177;Slc7a5;
R-MMU-983712	171	2	4.74025	0.421919	0.245808	0.355375	Ion_channel_transport	Stom;Atp2b4;
R-MMU-4085001	33	2	0.944901	2.11662	0.247813	0.355375	Sialic_acid_metabolism	Cmas;St3gal5;
R-MMU-5693616	33	2	0.944901	2.11662	0.247813	0.355375	Presynaptic_phase_of_homologous_DNA_pairing_and_strand_exchange	Chek1;Blm;
R-MMU-418594	346	6	9.90714	0.605624	0.249639	0.356477	G_alpha_(i)_signalling_events	Metap2;Ppbp;Fpr2;Gpsm2;Pf4;Prkar2b;
R-MMU-6783310	34	2	0.283139	7.06367	0.258646	0.362879	Fanconi_Anemia_Pathway	Fancd2;Fanci;
R-MMU-6804757	34	2	0.736938	2.71393	0.258646	0.362879	Regulation_of_TP53_Degradation	Ccna2;Cdk1;
R-MMU-6806003	34	2	0.946384	2.11331	0.258646	0.362879	Regulation_of_TP53_Expression_and_Degradation	Cdk1;Ccna2;
R-MMU-187577	61	3	1.74663	1.71759	0.259507	0.362879	SCF(Skp2)-mediated_degradation_of_p27/p21	Ccne2;Ccna2;Ccne1;
R-MMU-71387	264	4	7.55921	0.529156	0.258692	0.362879	Metabolism_of_carbohydrates	Hmmr;Bpgm;B3gnt3;Aldh1a1;
R-MMU-111465	35	2	0.942277	2.12252	0.269484	0.372197	Apoptotic_cleavage_of_cellular_proteins	Clspn;Lmna;
R-MMU-8956319	35	2	0.978211	2.04455	0.269484	0.372197	Nucleobase_catabolism	Nt5c3;Gpx1;
R-MMU-76009	35	2	1.00217	1.99568	0.269484	0.372197	Platelet_Aggregation_(Plug_Formation)	Vwf;Gp1bb;
R-MMU-500792	382	7	6.44946	1.08536	0.272337	0.374602	GPCR_ligand_binding	P2ry1;Fpr2;Pf4;Ccrl2;Ppbp;Prokr1;Xk;
R-MMU-5617833	194	8	1.99179	4.0165	0.276986	0.378919	Cilium_Assembly	Tubb4b;Cep76;Nek2;Ninl;Cdk1;Plk1;Tuba4a;Prkar2b;
R-MMU-1280218	666	24	19.1458	1.25354	0.277724	0.378919	Adaptive_Immune_System	Fzr1;Asb1;Kif2c;Fcgr4;Ubac1;Ube2l6;Kif23;Ccnf;Fbxo30;Cenpe;Cdc20;Tuba4a;Ctse;Kif15;Tubb4b;Kif18b;Kif4;Kif22;Tnfrsf14;Kif18a;Kif11;Ube2c;Ube2o;Kifc1;
R-MMU-9646399	37	2	0.886379	2.25637	0.291143	0.394036	Aggrephagy	Tuba4a;Tubb4b;
R-MMU-1433557	37	2	0.979238	2.0424	0.291143	0.394036	Signaling_by_SCF-KIT	Chek1;Mmp9;
R-MMU-425407	224	9	6.235	1.44346	0.308179	0.415425	SLC-mediated_transmembrane_transport	Slc43a1;Slc16a1;Bsg;Slc6a9;Slc16a10;Slc6a20a;Slc22a4;Slc14a1;Slc7a5;
R-MMU-5674135	39	2	1.08556	1.84237	0.312719	0.419866	MAP2K_and_MAPK_activation	Arrb1;Vwf;
R-MMU-190828	40	2	1.15902	1.72559	0.323458	0.432561	Gap_junction_trafficking	Tuba4a;Tubb4b;
R-MMU-156580	92	4	2.24595	1.78098	0.342747	0.454747	Phase_II_-_Conjugation_of_compounds	Gclm;Chac2;Mgst3;Gstm5;
R-MMU-6807878	92	4	2.66575	1.50051	0.342747	0.454747	COPI-mediated_anterograde_transport	Ank1;Tubb4b;Tuba4a;Spta1;
R-MMU-157858	42	2	1.16427	1.71781	0.3448	0.455677	Gap_junction_trafficking_and_regulation	Tubb4b;Tuba4a;
R-MMU-199991	537	19	15.4374	1.23078	0.351687	0.462963	Membrane_Trafficking	Kif15;Tubb4b;Spta1;Kif18b;Kif4;Kif22;Kif18a;Kif11;Kifc1;Kif2c;Arrb1;Ank1;Kif23;Tfrc;Cenpe;Itsn1;Optn;Tuba4a;Rab3il1;
R-MMU-166658	45	2	1.25257	1.59672	0.376385	0.493548	Complement_cascade	Elane;Fcnb;
R-MMU-1483257	186	3	3.45859	0.867406	0.379447	0.495634	Phospholipid_metabolism	Ptdss2;Pcyt1b;Pip5k1b;
R-MMU-416476	198	3	5.51129	0.544337	0.385322	0.501365	G_alpha_(q)_signalling_events	P2ry1;Fpr2;Prokr1;
R-MMU-114608	115	5	1.71857	2.90939	0.389475	0.504819	Platelet_degranulation_	Brpf3;Tuba4a;Vwf;Pf4;Ppbp;
R-MMU-193648	47	2	1.30824	1.52878	0.397093	0.512722	NRAGE_signals_death_through_JNK	Ect2;Itsn1;
R-MMU-76005	120	5	3.34018	1.49693	0.400677	0.515374	Response_to_elevated_platelet_cytosolic_Ca2+	Vwf;Pf4;Brpf3;Tuba4a;Ppbp;
R-MMU-392499	1584	51	45.5359	1.12	0.407776	0.522512	Metabolism_of_proteins	H2bc11;Asb1;Top2a;Ctsg;H2aw;Yod1;St3gal5;Fn3krp;H2bc9;Tuba4a;H2bc8;Tubb4b;Rad23a;Spta1;H2bc13;Birc5;B3gnt3;H2bc6;H2bc7;Brca1;Ube2c;Clspn;Blm;Fcgr4;Cdca8;Otub2;H2bc12;Apol11b;Dtl;Ank1;Cmas;Arrb1;Cdc20;H2ac4;Ccnf;Fbxo30;Pigq;H4c4;H4c11;Apol11a;Aurkb;Josd2;Cdk1;H4c8;H2ac8;H2ac7;Art4;H4c1;Apol10a;H2ac15;Ccna2;
R-MMU-69563	65	3	1.59423	1.88179	0.438016	0.557024	p53-Dependent_G1_DNA_Damage_Response	Ccna2;Ccne1;Ccne2;
R-MMU-69580	65	3	1.70545	1.75906	0.438016	0.557024	p53-Dependent_G1/S_DNA_damage_checkpoint	Ccne2;Ccne1;Ccna2;
R-MMU-168898	140	2	3.86493	0.517473	0.443589	0.559886	Toll-like_Receptor_Cascades	S100a8;S100a9;
R-MMU-112314	136	2	3.75451	0.532693	0.442276	0.559886	Neurotransmitter_receptors_and_postsynaptic_signal_transmission	Kcnj5;Prkar2b;
R-MMU-201681	144	2	4.17248	0.479331	0.446442	0.561384	TCF_dependent_signaling_in_response_to_WNT	Sox6;Pip5k1b;
R-MMU-5673001	256	5	7.0381	0.710419	0.451447	0.565567	RAF/MAP_kinase_cascade	Bcl2l1;Spta1;Arrb1;Dusp8;Vwf;
R-MMU-68949	70	3	1.30162	2.30482	0.457698	0.571275	Orc1_removal_from_chromatin	Cdc6;Mcm2;Ccna2;
R-MMU-69202	71	3	1.97627	1.51801	0.461987	0.574501	Cyclin_E_associated_events_during_G1/S_transition_	Ccna2;Ccne1;Ccne2;
R-MMU-163125	79	3	2.27105	1.32098	0.499459	0.618815	Post-translational_modification:_synthesis_of_GPI-anchored_proteins	Fcgr4;Pigq;Art4;
R-MMU-425393	99	4	2.77823	1.43976	0.536183	0.661882	Transport_of_inorganic_cations/anions_and_amino_acids/oligopeptides	Slc6a20a;Slc7a5;Slc43a1;Slc16a10;
R-MMU-1852241	222	8	6.35661	1.25853	0.538692	0.662551	Organelle_biogenesis_and_maintenance	Prkar2b;Tuba4a;Plk1;Cdk1;Ninl;Tubb4b;Nek2;Cep76;
R-MMU-1474244	270	9	6.16016	1.461	0.581596	0.710137	Extracellular_matrix_organization	Mmp9;Bsg;Vwf;Capn5;Elane;Mmp25;Emilin2;Ctsg;Mmp8;
R-MMU-196849	116	4	3.36117	1.19006	0.580271	0.710137	Metabolism_of_water-soluble_vitamins_and_cofactors	Naprt;Pnpo;Nmnat3;Nadk2;
R-MMU-5683057	285	6	7.21766	0.831294	0.587626	0.714909	MAPK_family_signaling_cascades	Dusp8;Arrb1;Spta1;Cdk1;Vwf;Bcl2l1;
R-MMU-168249	926	29	24.2961	1.19361	0.605756	0.731684	Innate_Immune_System	Abca13;Lcn2;Stom;Fcnb;Naprt;Hp;Mpo;Fcgr4;Svip;Ms4a3;Ctsg;Prg2;Mmp8;Ppbp;Hbb-bt;Slpi;Ltf;Camp;Elane;Tubb4b;S100a8;Mmp25;Cd177;Mettl7a1;Fpr2;Mmp9;Bcl2l1;Alad;S100a9;
R-MMU-194840	139	5	3.99589	1.25128	0.604085	0.731684	Rho_GTPase_cycle	Itsn1;Depdc1b;Ect2;Ccne1;Arhgap11a;
R-MMU-6811436	48	2	1.33607	1.49693	0.650199	0.782561	COPI-independent_Golgi-to-ER_retrograde_traffic	Tuba4a;Tubb4b;
R-MMU-375276	184	6	4.26101	1.40812	0.657766	0.785659	Peptide_ligand-binding_receptors	Xk;Pf4;Prokr1;Ppbp;Ccrl2;Fpr2;
R-MMU-350562	51	2	1.46612	1.36415	0.659767	0.785659	Regulation_of_ornithine_decarboxylase_(ODC)	Odc1;Nqo1;
R-MMU-3371497	50	2	1.44878	1.38047	0.656467	0.785659	HSP90_chaperone_cycle_for_steroid_hormone_receptors_(SHR)	Tuba4a;Tubb4b;
R-MMU-432722	52	2	1.48893	1.34324	0.663167	0.786927	Golgi_Associated_Vesicle_Biogenesis	Arrb1;Tfrc;
R-MMU-5620924	55	2	0.432923	4.61976	0.673876	0.794043	Intraflagellar_transport	Tuba4a;Tubb4b;
R-MMU-1442490	55	2	1.59366	1.25497	0.673876	0.794043	Collagen_degradation	Mmp9;Mmp8;
R-MMU-5684996	262	6	5.55921	1.07929	0.708228	0.813646	MAPK1/MAPK3_signaling	Bcl2l1;Arrb1;Dusp8;Spta1;Cdk1;Vwf;
R-MMU-2682334	65	2	1.40144	1.42711	0.713013	0.813646	EPH-Ephrin_signaling	Itsn1;Mmp9;
R-MMU-8878166	63	2	1.59548	1.25354	0.704936	0.813646	Transcriptional_regulation_by_RUNX2	Ccnb1;Cdk1;
R-MMU-913531	62	2	1.62674	1.22945	0.700927	0.813646	Interferon_Signaling	Ube2l6;Isg15;
R-MMU-9663891	65	2	1.70545	1.17271	0.713013	0.813646	Selective_autophagy	Tuba4a;Tubb4b;
R-MMU-204998	65	2	1.81668	1.10091	0.713013	0.813646	Cell_death_signalling_via_NRAGE,_NRIF_and_NADE	Itsn1;Ect2;
R-MMU-983168	282	9	8.07461	1.11461	0.71704	0.813646	Antigen_processing:_Ubiquitination_&_Proteasome_degradation	Ubac1;Ube2l6;Asb1;Fzr1;Ube2o;Ube2c;Cdc20;Ccnf;Fbxo30;
R-MMU-76002	241	8	6.90064	1.15931	0.694206	0.813646	Platelet_activation,_signaling_and_aggregation	Ppbp;Pf4;Gp1bb;Arrb1;Tuba4a;P2ry1;Vwf;Brpf3;
R-MMU-174084	64	2	1.83984	1.08705	0.708967	0.813646	Autodegradation_of_Cdh1_by_Cdh1:APC/C	Ube2c;Fzr1;
R-MMU-446219	61	2	1.75359	1.14052	0.696943	0.813646	Synthesis_of_substrates_in_N-glycan_biosythesis	St3gal5;Cmas;
R-MMU-8939236	66	2	1.91239	1.04581	0.717071	0.813646	RUNX1_regulates_transcription_of_genes_involved_in_differentiation_of_HSCs	Tal1;Gata1;
R-MMU-373076	297	7	8.50411	0.823132	0.724572	0.819399	Class_A/1_(Rhodopsin-like_receptors)	Prokr1;Xk;Ppbp;Ccrl2;Pf4;P2ry1;Fpr2;
R-MMU-15869	95	3	2.04826	1.46466	0.755926	0.851997	Metabolism_of_nucleotides	Rrm2;Nt5c3;Gpx1;
R-MMU-8856825	98	3	2.32535	1.29013	0.762186	0.85424	Cargo_recognition_for_clathrin-mediated_endocytosis	Itsn1;Tfrc;Arrb1;
R-MMU-446652	106	2	2.64819	0.755234	0.771569	0.85424	Interleukin-1_family_signaling	Il1rl1;Ctsg;
R-MMU-1630316	118	2	3.37874	0.591937	0.777991	0.85424	Glycosaminoglycan_metabolism	B3gnt3;Hmmr;
R-MMU-1483206	114	2	3.2642	0.612707	0.774992	0.85424	Glycerophospholipid_biosynthesis	Ptdss2;Pcyt1b;
R-MMU-199418	103	2	2.96099	0.675451	0.771284	0.85424	Negative_regulation_of_the_PI3K/AKT_network	Il1rl1;Pip5k1b;
R-MMU-211945	111	2	3.19096	0.62677	0.773282	0.85424	Phase_I_-_Functionalization_of_compounds	Aldh1a1;Smox;
R-MMU-9612973	121	4	3.50605	1.14089	0.78073	0.85424	Autophagy	Tuba4a;Tubb4b;Wipi1;Atg4a;
R-MMU-9007101	110	2	3.18731	0.627487	0.772822	0.85424	Rab_regulation_of_trafficking	Optn;Rab3il1;
R-MMU-1632852	121	4	3.50605	1.14089	0.78073	0.85424	Macroautophagy	Atg4a;Tubb4b;Wipi1;Tuba4a;
R-MMU-948021	171	4	3.14066	1.27362	0.820174	0.894494	Transport_to_the_Golgi_and_subsequent_modification	Tubb4b;Ank1;Tuba4a;Spta1;
R-MMU-8951664	214	5	6.12754	0.815988	0.835689	0.908475	Neddylation	Dtl;Birc5;Asb1;Fbxo30;Ccnf;
R-MMU-449147	258	8	6.94593	1.15175	0.849297	0.91184	Signaling_by_Interleukins	H3c7;Il1rl1;H3c11;Ctsg;H3c4;H3c10;H3c15;H3c8;
R-MMU-422475	258	8	7.18138	1.11399	0.849297	0.91184	Axon_guidance	Kif4;Reln;Itsn1;Tuba4a;Mmp9;Tubb4b;Ank1;Spta1;
R-MMU-446203	256	6	7.12571	0.842021	0.848725	0.91184	Asparagine_N-linked_glycosylation	Cmas;Ank1;Spta1;Tubb4b;Tuba4a;St3gal5;
R-MMU-9675108	259	8	7.41604	1.07874	0.849607	0.91184	Nervous_system_development	Kif4;Reln;Tuba4a;Mmp9;Itsn1;Tubb4b;Ank1;Spta1;
R-MMU-5610787	106	3	0.858544	3.49429	1	1	Hedgehog_'off'_state	Tuba4a;Prkar2b;Tubb4b;
R-MMU-196854	178	5	1.74629	2.86321	1	1	Metabolism_of_vitamins_and_cofactors	Nmnat3;Gch1;Pnpo;Naprt;Nadk2;
R-MMU-211859	209	6	2.76569	2.16944	1	1	Biological_oxidations	Gclm;Chac2;Mgst3;Gstm5;Aldh1a1;Smox;
R-MMU-193704	80	2	1.1499	1.73929	1	1	p75_NTR_receptor-mediated_signalling	Itsn1;Ect2;
R-MMU-199992	68	2	1.26443	1.58174	1	1	trans-Golgi_Network_Vesicle_Budding	Tfrc;Arrb1;
R-MMU-71291	247	7	4.95916	1.41153	1	1	Metabolism_of_amino_acids_and_derivatives	Odc1;Nqo1;Slc25a21;Mpst;Smox;Slc7a5;Asns;
R-MMU-8957275	113	3	2.44924	1.22487	1	1	Post-translational_protein_phosphorylation	Apol10a;Apol11a;Apol11b;
R-MMU-382556	99	2	2.3152	0.863858	1	1	ABC-family_proteins_mediated_transport	Abcb9;Abcb4;
R-MMU-6811558	96	2	2.2998	0.869643	1	1	PI5P,_PP2A_and_IER3_Regulate_PI3K/AKT_Signaling	Il1rl1;Pip5k1b;
R-MMU-416482	69	2	1.67659	1.1929	1	1	G_alpha_(12/13)_signalling_events	Ect2;Itsn1;
R-MMU-8856828	136	3	3.56833	0.840729	1	1	Clathrin-mediated_endocytosis	Arrb1;Itsn1;Tfrc;
R-MMU-446193	71	2	1.87908	1.06435	1	1	Biosynthesis_of_the_N-glycan_precursor_(dolichol_lipid-linked_oligosaccharide,_LLO)_and_transfer_to_a_nascent_protein	Cmas;St3gal5;
R-MMU-1280215	378	11	10.1766	1.08091	1	1	Cytokine_Signaling_in_Immune_system	H3c8;H3c15;Tnfrsf14;H3c10;H3c4;Isg15;Ube2l6;Ctsg;H3c11;Il1rl1;H3c7;
R-MMU-73887	120	3	3.23066	0.928602	1	1	Death_Receptor_Signalling	Sppl2b;Ect2;Itsn1;
R-MMU-381426	119	3	3.20374	0.936405	1	1	Regulation_of_Insulin-like_Growth_Factor_(IGF)_transport_and_uptake_by_Insulin-like_Growth_Factor_Binding_Proteins_(IGFBPs)	Apol11b;Apol11a;Apol10a;
R-MMU-1428517	165	4	4.53628	0.88178	1	1	The_citric_acid_(TCA)_cycle_and_respiratory_electron_transport	Hagh;Bsg;Slc16a1;Fahd1;
R-MMU-5358351	137	4	3.79774	1.05326	1	1	Signaling_by_Hedgehog	Tuba4a;Arrb1;Prkar2b;Tubb4b;
R-MMU-216083	69	2	1.9206	1.04134	1	1	Integrin_cell_surface_interactions	Bsg;Vwf;
R-MMU-3108214	71	2	2.03297	0.983783	1	1	SUMOylation_of_DNA_damage_response_and_repair_proteins	Blm;Brca1;
R-MMU-199977	143	4	4.09457	0.976904	1	1	ER_to_Golgi_Anterograde_Transport	Ank1;Tuba4a;Spta1;Tubb4b;
R-MMU-5696398	99	2	2.86858	0.697208	1	1	Nucleotide_Excision_Repair	Rad23a;Lig1;
R-MMU-174154	68	2	1.97034	1.01505	1	1	APC/C:Cdc20_mediated_degradation_of_Securin	Ube2c;Cdc20;
R-MMU-983169	340	9	9.8517	0.913548	1	1	Class_I_MHC_mediated_antigen_processing_&_presentation	Ube2c;Ube2o;Ccnf;Fbxo30;Cdc20;Ube2l6;Ubac1;Fzr1;Asb1;
Table S5f: Results of 487 DEGs (up-regulated in C3G treatment CAM vs AM comparison) in panther enrichment analysis for biological function
Sr. No.	Biological Function	No. of Genes
1	cellular process (GO:0009987)	225	56.0%	31.3%
2	biological phase (GO:0044848)	5	1.2%	0.7%
3	reproductive process (GO:0022414)	12	3.0%	1.7%
4	multi-organism process (GO:0051704)	1	0.2%	0.1%
5	localization (GO:0051179)	49	12.2%	6.8%
6	interspecies interaction between organisms (GO:0044419)	14	3.5%	1.9%
7	reproduction (GO:0000003)	12	3.0%	1.7%
8	biological regulation (GO:0065007)	115	28.6%	16.0%
9	response to stimulus (GO:0050896)	57	14.2%	7.9%
10	signaling (GO:0023052)	24	6.0%	3.3%
11	developmental process (GO:0032502)	16	4.0%	2.2%
12	multicellular organismal process (GO:0032501)	21	5.2%	2.9%
13	locomotion (GO:0040011)	6	1.5%	0.8%
14	biological adhesion (GO:0022610)	6	1.5%	0.8%
15	metabolic process (GO:0008152)	131	32.6%	18.2%
16	immune system process (GO:0002376)	24	6.0%	3.3%
Table S6a: Results of 53 DEGs (down-regulated in C3G treatment CAM vs AM comparison) according to molecular function in panther enrichment analysis for molecular function
Sr. No.	Molecular Function	No. of Genes
1	binding (GO:0005488)	2	0.087	0.222
2	molecular function regulator (GO:0098772)	1	0.043	0.111
3	catalytic activity (GO:0003824)	4	0.174	0.444
4	transporter activity (GO:0005215)	2	0.087	0.222
Table S6b: Results of 53 DEGs (down-regulated in C3G treatment CAM vs AM comparison) according to cellular component in panther enrichment analysis for cellular components
Sr. No.	Cellular Component	No. of Genes
1	cellular anatomical entity (GO:0110165)	13	56.5%	68.4%
2	protein-containing complex (GO:0032991)	1	4.3%	5.3%
3	intracellular (GO:0005622)	5	21.7%	26.3%
Table S6c: Results of 53 DEGs (down-regulated in C3G treatment CAM vs AM comparison) according to protein class in panther enrichment analysis for protein class
Sr. No.	Protein Class	No. of Genes
1	protein modifying enzyme (PC00260)	2	8.7%	13.3%
2	transporter (PC00227)	2	8.7%	13.3%
3	membrane traffic protein (PC00150)	1	4.3%	6.7%
4	chaperone (PC00072)	1	4.3%	6.7%
5	cell adhesion molecule (PC00069)	2	8.7%	13.3%
6	defense/immunity protein (PC00090)	3	13.0%	20.0%
7	intercellular signal molecule (PC00207)	1	4.3%	6.7%
8	gene-specific transcriptional regulator (PC00264)	1	4.3%	6.7%
9	translational protein (PC00263)	1	4.3%	6.7%
10	metabolite interconversion enzyme (PC00262)	1	4.3%	6.7%
Table S6d: Results of 53 DEGs (down-regulated in C3G treatment CAM vs AM comparison) according to pathways in panther enrichment analysis for pathways
Sr. No.	Pathways	No. of Genes
1	Cadherin signaling pathway (P00012)	2	8.7%	18.2%
2	Histamine H1 receptor mediated signaling pathway (P04385)	1	4.3%	9.1%
3	Insulin/IGF pathway-protein kinase B signaling cascade (P00033)	1	4.3%	9.1%
4	Insulin/IGF pathway-mitogen activated protein kinase kinase/MAP kinase cascade (P00032)	1	4.3%	9.1%
5	Inflammation mediated by chemokine and cytokine signaling pathway (P00031)	1	4.3%	9.1%
6	Wnt signaling pathway (P00057)	2	8.7%	18.2%
7	5HT2 type receptor mediated signaling pathway (P04374)	1	4.3%	9.1%
8	Thyrotropin-releasing hormone receptor signaling pathway (P04394)	1	4.3%	9.1%
9	Oxytocin receptor mediated signaling pathway (P04391)	1	4.3%	9.1%
Table S6e: Results of 53 DEGs (down-regulated in C3G treatment CAM vs AM comparison) in panther enrichment analysis for biological function
Sr. No.	Biological Function	No. of Genes
1	cellular process (GO:0009987)	9	0.391	0.31
2	interspecies interaction between organisms (GO:0044419)	1	0.043	0.034
3	biological regulation (GO:0065007)	4	0.174	0.138
4	response to stimulus (GO:0050896)	6	0.261	0.207
5	signaling (GO:0023052)	1	0.043	0.034
6	developmental process (GO:0032502)	1	0.043	0.034
7	biological adhesion (GO:0022610)	2	0.087	0.069
8	multicellular organismal process (GO:0032501)	1	0.043	0.034
9	metabolic process (GO:0008152)	1	0.043	0.034
10	immune system process (GO:0002376)	3	0.13	0.103
Table S7a: PPN1 Network stats of protein-protein interaction network from STRING
Sr. No.	No. of nodes	No. of edges	Average node degree	Expected no. of edges	Averge local clustering coefficient	PPI enrichment p-value
1	839	3748	8.93	1364	0.432	< 1.0e-16
Table S7b: PPN2 Network stats of protein-protein interaction network from STRING
Sr. No.	No. of nodes	No. of edges	Average node degree	Expected no. of edges	Averge local clustering coefficient	PPI enrichment p-value
1	463	6429	27.8	1986	0.546	< 1.0e-16

## Sheet: Table S2
Table S2: List of differential expression of genes in the groups
Wt mice Vs ADM mice	Wt mice Vs ADM mice	ADM mice+C3G Vs ADM mice	ADM mice+C3G Vs ADM mice
UP- 444 genes	Down- 904 genes	UP-487	Down-53
ENSMUSG00000000248	ENSMUSG00000000093	ENSMUSG00000000028	ENSMUSG00000001520
ENSMUSG00000000365	ENSMUSG00000000325	ENSMUSG00000000056	ENSMUSG00000006651
ENSMUSG00000000982	ENSMUSG00000000411	ENSMUSG00000000157	ENSMUSG00000015222
ENSMUSG00000002324	ENSMUSG00000001014	ENSMUSG00000000204	ENSMUSG00000021268
ENSMUSG00000003038	ENSMUSG00000001225	ENSMUSG00000000804	ENSMUSG00000021750
ENSMUSG00000004296	ENSMUSG00000001403	ENSMUSG00000001156	ENSMUSG00000026173
ENSMUSG00000005087	ENSMUSG00000001497	ENSMUSG00000001228	ENSMUSG00000030022
ENSMUSG00000006154	ENSMUSG00000001583	ENSMUSG00000001403	ENSMUSG00000030219
ENSMUSG00000006219	ENSMUSG00000001763	ENSMUSG00000001517	ENSMUSG00000030428
ENSMUSG00000008668	ENSMUSG00000001988	ENSMUSG00000001763	ENSMUSG00000034275
ENSMUSG00000010136	ENSMUSG00000002055	ENSMUSG00000001918	ENSMUSG00000040197
ENSMUSG00000015437	ENSMUSG00000002475	ENSMUSG00000001930	ENSMUSG00000040441
ENSMUSG00000015656	ENSMUSG00000002808	ENSMUSG00000002055	ENSMUSG00000044349
ENSMUSG00000017002	ENSMUSG00000002997	ENSMUSG00000002068	ENSMUSG00000048583
ENSMUSG00000018425	ENSMUSG00000003469	ENSMUSG00000002808	ENSMUSG00000049100
ENSMUSG00000018672	ENSMUSG00000003585	ENSMUSG00000002835	ENSMUSG00000061603
ENSMUSG00000020010	ENSMUSG00000003849	ENSMUSG00000002870	ENSMUSG00000063455
ENSMUSG00000020123	ENSMUSG00000004031	ENSMUSG00000002997	ENSMUSG00000064115
ENSMUSG00000020892	ENSMUSG00000004032	ENSMUSG00000003585	ENSMUSG00000065773
ENSMUSG00000020937	ENSMUSG00000004552	ENSMUSG00000003813	ENSMUSG00000065822
ENSMUSG00000021091	ENSMUSG00000004655	ENSMUSG00000003849	ENSMUSG00000065870
ENSMUSG00000021362	ENSMUSG00000004988	ENSMUSG00000004032	ENSMUSG00000066687
ENSMUSG00000021565	ENSMUSG00000005057	ENSMUSG00000004552	ENSMUSG00000069117
ENSMUSG00000021587	ENSMUSG00000005148	ENSMUSG00000004655	ENSMUSG00000069515
ENSMUSG00000021636	ENSMUSG00000005161	ENSMUSG00000004668	ENSMUSG00000069755
ENSMUSG00000021678	ENSMUSG00000005233	ENSMUSG00000005161	ENSMUSG00000071753
ENSMUSG00000021708	ENSMUSG00000005470	ENSMUSG00000005470	ENSMUSG00000072674
ENSMUSG00000021867	ENSMUSG00000006235	ENSMUSG00000005800	ENSMUSG00000072844
ENSMUSG00000022126	ENSMUSG00000006369	ENSMUSG00000006235	ENSMUSG00000073409
ENSMUSG00000022468	ENSMUSG00000006398	ENSMUSG00000006398	ENSMUSG00000074505
ENSMUSG00000022639	ENSMUSG00000006435	ENSMUSG00000007379	ENSMUSG00000084708
ENSMUSG00000023913	ENSMUSG00000006567	ENSMUSG00000007659	ENSMUSG00000087014
ENSMUSG00000024112	ENSMUSG00000006574	ENSMUSG00000008226	ENSMUSG00000089376
ENSMUSG00000024124	ENSMUSG00000006958	ENSMUSG00000008393	ENSMUSG00000091938
ENSMUSG00000024402	ENSMUSG00000007035	ENSMUSG00000008843	ENSMUSG00000092134
ENSMUSG00000024769	ENSMUSG00000007379	ENSMUSG00000009350	ENSMUSG00000092805
ENSMUSG00000025036	ENSMUSG00000007659	ENSMUSG00000010048	ENSMUSG00000093843
ENSMUSG00000025243	ENSMUSG00000008090	ENSMUSG00000011179	ENSMUSG00000094356
ENSMUSG00000025321	ENSMUSG00000008734	ENSMUSG00000012443	ENSMUSG00000094812
ENSMUSG00000025431	ENSMUSG00000008843	ENSMUSG00000015342	ENSMUSG00000094993
ENSMUSG00000025433	ENSMUSG00000008845	ENSMUSG00000015880	ENSMUSG00000095260
ENSMUSG00000025823	ENSMUSG00000009350	ENSMUSG00000016200	ENSMUSG00000095590
ENSMUSG00000025854	ENSMUSG00000009394	ENSMUSG00000016526	ENSMUSG00000095701
ENSMUSG00000025909	ENSMUSG00000009545	ENSMUSG00000017002	ENSMUSG00000096214
ENSMUSG00000025936	ENSMUSG00000010048	ENSMUSG00000017146	ENSMUSG00000096243
ENSMUSG00000026073	ENSMUSG00000010154	ENSMUSG00000017314	ENSMUSG00000096349
ENSMUSG00000026285	ENSMUSG00000012123	ENSMUSG00000017499	ENSMUSG00000096838
ENSMUSG00000026765	ENSMUSG00000012126	ENSMUSG00000017716	ENSMUSG00000097451
ENSMUSG00000027071	ENSMUSG00000012396	ENSMUSG00000017737	ENSMUSG00000103630
ENSMUSG00000027171	ENSMUSG00000013155	ENSMUSG00000017861	ENSMUSG00000103706
ENSMUSG00000027398	ENSMUSG00000015217	ENSMUSG00000018659	ENSMUSG00000106181
ENSMUSG00000027408	ENSMUSG00000015829	ENSMUSG00000018677	ENSMUSG00000110440
ENSMUSG00000027533	ENSMUSG00000016200	ENSMUSG00000018909	ENSMUSG00000113136
ENSMUSG00000027716	ENSMUSG00000016386	ENSMUSG00000018983
ENSMUSG00000027718	ENSMUSG00000016526	ENSMUSG00000019437
ENSMUSG00000028036	ENSMUSG00000017314	ENSMUSG00000019773
ENSMUSG00000028238	ENSMUSG00000017417	ENSMUSG00000019838
ENSMUSG00000028327	ENSMUSG00000017499	ENSMUSG00000019942
ENSMUSG00000028736	ENSMUSG00000017716	ENSMUSG00000019992
ENSMUSG00000028843	ENSMUSG00000017861	ENSMUSG00000020125
ENSMUSG00000028883	ENSMUSG00000018554	ENSMUSG00000020185
ENSMUSG00000028965	ENSMUSG00000018659	ENSMUSG00000020235
ENSMUSG00000029007	ENSMUSG00000018983	ENSMUSG00000020300
ENSMUSG00000029075	ENSMUSG00000019775	ENSMUSG00000020309
ENSMUSG00000029093	ENSMUSG00000019817	ENSMUSG00000020330
ENSMUSG00000029304	ENSMUSG00000019838	ENSMUSG00000020334
ENSMUSG00000029314	ENSMUSG00000019853	ENSMUSG00000020493
ENSMUSG00000029417	ENSMUSG00000019942	ENSMUSG00000020638
ENSMUSG00000029816	ENSMUSG00000020083	ENSMUSG00000020641
ENSMUSG00000030111	ENSMUSG00000020125	ENSMUSG00000020649
ENSMUSG00000030165	ENSMUSG00000020185	ENSMUSG00000020669
ENSMUSG00000030167	ENSMUSG00000020234	ENSMUSG00000020802
ENSMUSG00000030178	ENSMUSG00000020241	ENSMUSG00000020866
ENSMUSG00000030187	ENSMUSG00000020295	ENSMUSG00000020897
ENSMUSG00000030306	ENSMUSG00000020330	ENSMUSG00000020914
ENSMUSG00000030325	ENSMUSG00000020333	ENSMUSG00000020932
ENSMUSG00000030365	ENSMUSG00000020334	ENSMUSG00000020990
ENSMUSG00000030376	ENSMUSG00000020490	ENSMUSG00000021061
ENSMUSG00000030433	ENSMUSG00000020600	ENSMUSG00000021102
ENSMUSG00000030651	ENSMUSG00000020641	ENSMUSG00000021203
ENSMUSG00000030670	ENSMUSG00000020646	ENSMUSG00000021221
ENSMUSG00000030793	ENSMUSG00000020649	ENSMUSG00000021485
ENSMUSG00000030825	ENSMUSG00000020658	ENSMUSG00000021697
ENSMUSG00000031584	ENSMUSG00000020669	ENSMUSG00000021714
ENSMUSG00000031596	ENSMUSG00000020802	ENSMUSG00000021792
ENSMUSG00000031861	ENSMUSG00000020838	ENSMUSG00000021965
ENSMUSG00000031933	ENSMUSG00000020866	ENSMUSG00000022018
ENSMUSG00000032446	ENSMUSG00000020900	ENSMUSG00000022021
ENSMUSG00000032487	ENSMUSG00000020932	ENSMUSG00000022026
ENSMUSG00000032549	ENSMUSG00000021061	ENSMUSG00000022033
ENSMUSG00000032690	ENSMUSG00000021102	ENSMUSG00000022034
ENSMUSG00000032872	ENSMUSG00000021118	ENSMUSG00000022099
ENSMUSG00000033880	ENSMUSG00000021221	ENSMUSG00000022100
ENSMUSG00000034641	ENSMUSG00000021388	ENSMUSG00000022253
ENSMUSG00000035041	ENSMUSG00000021391	ENSMUSG00000022385
ENSMUSG00000035129	ENSMUSG00000021485	ENSMUSG00000022438
ENSMUSG00000035208	ENSMUSG00000021697	ENSMUSG00000022564
ENSMUSG00000035435	ENSMUSG00000021714	ENSMUSG00000022574
ENSMUSG00000035498	ENSMUSG00000021792	ENSMUSG00000022651
ENSMUSG00000035860	ENSMUSG00000022021	ENSMUSG00000022742
ENSMUSG00000036169	ENSMUSG00000022026	ENSMUSG00000022797
ENSMUSG00000036437	ENSMUSG00000022033	ENSMUSG00000022803
ENSMUSG00000036594	ENSMUSG00000022034	ENSMUSG00000022957
ENSMUSG00000037411	ENSMUSG00000022099	ENSMUSG00000023175
ENSMUSG00000037443	ENSMUSG00000022100	ENSMUSG00000023307
ENSMUSG00000038007	ENSMUSG00000022371	ENSMUSG00000023328
ENSMUSG00000038508	ENSMUSG00000022376	ENSMUSG00000023505
ENSMUSG00000039013	ENSMUSG00000022385	ENSMUSG00000023903
ENSMUSG00000039084	ENSMUSG00000022523	ENSMUSG00000023940
ENSMUSG00000039372	ENSMUSG00000022564	ENSMUSG00000024053
ENSMUSG00000039395	ENSMUSG00000022742	ENSMUSG00000024072
ENSMUSG00000039431	ENSMUSG00000022755	ENSMUSG00000024158
ENSMUSG00000039691	ENSMUSG00000022797	ENSMUSG00000024206
ENSMUSG00000039716	ENSMUSG00000022803	ENSMUSG00000024533
ENSMUSG00000039891	ENSMUSG00000022843	ENSMUSG00000024588
ENSMUSG00000039908	ENSMUSG00000022899	ENSMUSG00000024663
ENSMUSG00000040133	ENSMUSG00000022957	ENSMUSG00000024681
ENSMUSG00000040498	ENSMUSG00000023019	ENSMUSG00000024747
ENSMUSG00000041272	ENSMUSG00000023216	ENSMUSG00000024787
ENSMUSG00000041323	ENSMUSG00000023236	ENSMUSG00000024791
ENSMUSG00000041453	ENSMUSG00000023328	ENSMUSG00000024867
ENSMUSG00000041596	ENSMUSG00000023926	ENSMUSG00000024939
ENSMUSG00000041654	ENSMUSG00000024026	ENSMUSG00000025025
ENSMUSG00000041729	ENSMUSG00000024053	ENSMUSG00000025217
ENSMUSG00000041827	ENSMUSG00000024109	ENSMUSG00000025270
ENSMUSG00000041921	ENSMUSG00000024114	ENSMUSG00000025495
ENSMUSG00000042073	ENSMUSG00000024158	ENSMUSG00000025573
ENSMUSG00000042254	ENSMUSG00000024206	ENSMUSG00000025702
ENSMUSG00000042262	ENSMUSG00000024211	ENSMUSG00000025728
ENSMUSG00000042743	ENSMUSG00000024261	ENSMUSG00000025889
ENSMUSG00000043029	ENSMUSG00000024301	ENSMUSG00000026027
ENSMUSG00000043153	ENSMUSG00000024411	ENSMUSG00000026028
ENSMUSG00000043873	ENSMUSG00000024437	ENSMUSG00000026039
ENSMUSG00000043924	ENSMUSG00000024486	ENSMUSG00000026069
ENSMUSG00000043932	ENSMUSG00000024511	ENSMUSG00000026196
ENSMUSG00000044229	ENSMUSG00000024533	ENSMUSG00000026202
ENSMUSG00000044533	ENSMUSG00000024588	ENSMUSG00000026203
ENSMUSG00000044712	ENSMUSG00000024663	ENSMUSG00000026311
ENSMUSG00000044811	ENSMUSG00000024680	ENSMUSG00000026348
ENSMUSG00000045410	ENSMUSG00000024681	ENSMUSG00000026389
ENSMUSG00000045775	ENSMUSG00000024892	ENSMUSG00000026411
ENSMUSG00000045868	ENSMUSG00000024990	ENSMUSG00000026463
ENSMUSG00000046101	ENSMUSG00000025175	ENSMUSG00000026532
ENSMUSG00000046782	ENSMUSG00000025189	ENSMUSG00000026605
ENSMUSG00000047293	ENSMUSG00000025270	ENSMUSG00000026622
ENSMUSG00000047507	ENSMUSG00000025400	ENSMUSG00000026657
ENSMUSG00000047517	ENSMUSG00000025453	ENSMUSG00000026672
ENSMUSG00000048388	ENSMUSG00000025495	ENSMUSG00000026683
ENSMUSG00000048538	ENSMUSG00000025507	ENSMUSG00000026688
ENSMUSG00000048612	ENSMUSG00000025573	ENSMUSG00000026815
ENSMUSG00000048758	ENSMUSG00000025701	ENSMUSG00000026822
ENSMUSG00000049149	ENSMUSG00000025702	ENSMUSG00000026835
ENSMUSG00000050103	ENSMUSG00000025728	ENSMUSG00000026880
ENSMUSG00000050526	ENSMUSG00000025747	ENSMUSG00000027073
ENSMUSG00000050967	ENSMUSG00000025784	ENSMUSG00000027074
ENSMUSG00000051079	ENSMUSG00000025889	ENSMUSG00000027075
ENSMUSG00000052102	ENSMUSG00000026069	ENSMUSG00000027078
ENSMUSG00000052125	ENSMUSG00000026141	ENSMUSG00000027115
ENSMUSG00000052477	ENSMUSG00000026193	ENSMUSG00000027306
ENSMUSG00000052605	ENSMUSG00000026198	ENSMUSG00000027326
ENSMUSG00000052736	ENSMUSG00000026235	ENSMUSG00000027327
ENSMUSG00000052749	ENSMUSG00000026249	ENSMUSG00000027330
ENSMUSG00000052776	ENSMUSG00000026274	ENSMUSG00000027331
ENSMUSG00000053175	ENSMUSG00000026311	ENSMUSG00000027333
ENSMUSG00000053716	ENSMUSG00000026348	ENSMUSG00000027379
ENSMUSG00000054510	ENSMUSG00000026389	ENSMUSG00000027454
ENSMUSG00000054951	ENSMUSG00000026463	ENSMUSG00000027469
ENSMUSG00000055413	ENSMUSG00000026469	ENSMUSG00000027490
ENSMUSG00000057182	ENSMUSG00000026532	ENSMUSG00000027495
ENSMUSG00000057234	ENSMUSG00000026605	ENSMUSG00000027496
ENSMUSG00000057440	ENSMUSG00000026614	ENSMUSG00000027510
ENSMUSG00000057722	ENSMUSG00000026683	ENSMUSG00000027562
ENSMUSG00000057836	ENSMUSG00000026688	ENSMUSG00000027654
ENSMUSG00000058427	ENSMUSG00000026725	ENSMUSG00000027699
ENSMUSG00000059355	ENSMUSG00000026815	ENSMUSG00000027715
ENSMUSG00000059639	ENSMUSG00000026822	ENSMUSG00000027765
ENSMUSG00000059742	ENSMUSG00000026835	ENSMUSG00000027860
ENSMUSG00000060019	ENSMUSG00000027075	ENSMUSG00000027883
ENSMUSG00000060550	ENSMUSG00000027078	ENSMUSG00000028063
ENSMUSG00000061232	ENSMUSG00000027160	ENSMUSG00000028068
ENSMUSG00000061242	ENSMUSG00000027186	ENSMUSG00000028124
ENSMUSG00000061356	ENSMUSG00000027306	ENSMUSG00000028175
ENSMUSG00000061769	ENSMUSG00000027318	ENSMUSG00000028212
ENSMUSG00000061852	ENSMUSG00000027326	ENSMUSG00000028328
ENSMUSG00000062638	ENSMUSG00000027333	ENSMUSG00000028393
ENSMUSG00000063157	ENSMUSG00000027546	ENSMUSG00000028542
ENSMUSG00000063245	ENSMUSG00000027556	ENSMUSG00000028551
ENSMUSG00000063660	ENSMUSG00000027562	ENSMUSG00000028644
ENSMUSG00000064294	ENSMUSG00000027715	ENSMUSG00000028678
ENSMUSG00000066009	ENSMUSG00000027750	ENSMUSG00000028684
ENSMUSG00000066363	ENSMUSG00000027765	ENSMUSG00000028717
ENSMUSG00000066487	ENSMUSG00000027792	ENSMUSG00000028718
ENSMUSG00000066705	ENSMUSG00000027827	ENSMUSG00000028832
ENSMUSG00000067203	ENSMUSG00000027840	ENSMUSG00000028873
ENSMUSG00000067341	ENSMUSG00000027855	ENSMUSG00000028906
ENSMUSG00000067599	ENSMUSG00000027883	ENSMUSG00000029086
ENSMUSG00000067750	ENSMUSG00000027966	ENSMUSG00000029372
ENSMUSG00000067916	ENSMUSG00000028063	ENSMUSG00000029373
ENSMUSG00000069755	ENSMUSG00000028124	ENSMUSG00000029408
ENSMUSG00000069792	ENSMUSG00000028125	ENSMUSG00000029414
ENSMUSG00000069830	ENSMUSG00000028132	ENSMUSG00000029516
ENSMUSG00000070327	ENSMUSG00000028150	ENSMUSG00000029613
ENSMUSG00000070348	ENSMUSG00000028175	ENSMUSG00000029716
ENSMUSG00000070390	ENSMUSG00000028328	ENSMUSG00000029752
ENSMUSG00000070732	ENSMUSG00000028332	ENSMUSG00000029780
ENSMUSG00000070880	ENSMUSG00000028393	ENSMUSG00000029802
ENSMUSG00000071552	ENSMUSG00000028542	ENSMUSG00000029922
ENSMUSG00000072680	ENSMUSG00000028573	ENSMUSG00000030217
ENSMUSG00000072721	ENSMUSG00000028610	ENSMUSG00000030282
ENSMUSG00000072731	ENSMUSG00000028644	ENSMUSG00000030346
ENSMUSG00000072774	ENSMUSG00000028684	ENSMUSG00000030528
ENSMUSG00000073028	ENSMUSG00000028713	ENSMUSG00000030677
ENSMUSG00000073125	ENSMUSG00000028716	ENSMUSG00000030867
ENSMUSG00000073164	ENSMUSG00000028717	ENSMUSG00000030878
ENSMUSG00000073179	ENSMUSG00000028825	ENSMUSG00000030979
ENSMUSG00000073197	ENSMUSG00000028860	ENSMUSG00000031004
ENSMUSG00000073409	ENSMUSG00000028873	ENSMUSG00000031162
ENSMUSG00000073411	ENSMUSG00000028906	ENSMUSG00000031262
ENSMUSG00000073418	ENSMUSG00000028989	ENSMUSG00000031543
ENSMUSG00000073421	ENSMUSG00000028996	ENSMUSG00000031698
ENSMUSG00000073608	ENSMUSG00000029032	ENSMUSG00000031722
ENSMUSG00000073609	ENSMUSG00000029153	ENSMUSG00000031756
ENSMUSG00000073879	ENSMUSG00000029414	ENSMUSG00000031803
ENSMUSG00000073902	ENSMUSG00000029428	ENSMUSG00000031877
ENSMUSG00000074034	ENSMUSG00000029516	ENSMUSG00000031974
ENSMUSG00000074358	ENSMUSG00000029607	ENSMUSG00000032028
ENSMUSG00000074418	ENSMUSG00000029716	ENSMUSG00000032034
ENSMUSG00000074604	ENSMUSG00000029752	ENSMUSG00000032113
ENSMUSG00000074607	ENSMUSG00000029780	ENSMUSG00000032126
ENSMUSG00000074634	ENSMUSG00000029802	ENSMUSG00000032204
ENSMUSG00000074735	ENSMUSG00000029866	ENSMUSG00000032218
ENSMUSG00000075269	ENSMUSG00000029922	ENSMUSG00000032254
ENSMUSG00000076435	ENSMUSG00000030000	ENSMUSG00000032380
ENSMUSG00000076463	ENSMUSG00000030188	ENSMUSG00000032411
ENSMUSG00000076472	ENSMUSG00000030207	ENSMUSG00000032456
ENSMUSG00000076473	ENSMUSG00000030208	ENSMUSG00000032484
ENSMUSG00000076536	ENSMUSG00000030218	ENSMUSG00000032496
ENSMUSG00000076547	ENSMUSG00000030317	ENSMUSG00000032519
ENSMUSG00000076548	ENSMUSG00000030329	ENSMUSG00000032589
ENSMUSG00000076564	ENSMUSG00000030364	ENSMUSG00000032656
ENSMUSG00000076569	ENSMUSG00000030427	ENSMUSG00000032661
ENSMUSG00000076576	ENSMUSG00000030878	ENSMUSG00000032679
ENSMUSG00000076587	ENSMUSG00000030979	ENSMUSG00000032690
ENSMUSG00000076604	ENSMUSG00000031004	ENSMUSG00000032783
ENSMUSG00000076613	ENSMUSG00000031162	ENSMUSG00000032902
ENSMUSG00000076615	ENSMUSG00000031170	ENSMUSG00000033688
ENSMUSG00000076666	ENSMUSG00000031189	ENSMUSG00000033952
ENSMUSG00000076695	ENSMUSG00000031253	ENSMUSG00000034006
ENSMUSG00000076710	ENSMUSG00000031325	ENSMUSG00000034023
ENSMUSG00000076855	ENSMUSG00000031379	ENSMUSG00000034059
ENSMUSG00000076864	ENSMUSG00000031382	ENSMUSG00000034248
ENSMUSG00000077391	ENSMUSG00000031391	ENSMUSG00000034311
ENSMUSG00000078162	ENSMUSG00000031410	ENSMUSG00000034449
ENSMUSG00000078606	ENSMUSG00000031486	ENSMUSG00000034459
ENSMUSG00000078630	ENSMUSG00000031495	ENSMUSG00000034906
ENSMUSG00000079105	ENSMUSG00000031538	ENSMUSG00000035206
ENSMUSG00000079190	ENSMUSG00000031543	ENSMUSG00000035246
ENSMUSG00000079298	ENSMUSG00000031698	ENSMUSG00000035365
ENSMUSG00000079339	ENSMUSG00000031872	ENSMUSG00000035455
ENSMUSG00000079450	ENSMUSG00000031877	ENSMUSG00000035472
ENSMUSG00000079501	ENSMUSG00000031893	ENSMUSG00000035547
ENSMUSG00000079505	ENSMUSG00000031974	ENSMUSG00000035692
ENSMUSG00000079685	ENSMUSG00000032014	ENSMUSG00000036002
ENSMUSG00000079710	ENSMUSG00000032023	ENSMUSG00000036112
ENSMUSG00000079852	ENSMUSG00000032126	ENSMUSG00000036181
ENSMUSG00000080994	ENSMUSG00000032131	ENSMUSG00000036223
ENSMUSG00000081169	ENSMUSG00000032204	ENSMUSG00000036352
ENSMUSG00000081262	ENSMUSG00000032243	ENSMUSG00000036377
ENSMUSG00000081665	ENSMUSG00000032285	ENSMUSG00000036390
ENSMUSG00000082154	ENSMUSG00000032323	ENSMUSG00000036718
ENSMUSG00000082190	ENSMUSG00000032332	ENSMUSG00000036752
ENSMUSG00000082292	ENSMUSG00000032380	ENSMUSG00000036768
ENSMUSG00000083087	ENSMUSG00000032392	ENSMUSG00000036777
ENSMUSG00000083382	ENSMUSG00000032411	ENSMUSG00000036814
ENSMUSG00000084010	ENSMUSG00000032452	ENSMUSG00000037287
ENSMUSG00000084350	ENSMUSG00000032484	ENSMUSG00000037313
ENSMUSG00000084425	ENSMUSG00000032561	ENSMUSG00000037336
ENSMUSG00000084803	ENSMUSG00000032564	ENSMUSG00000037415
ENSMUSG00000085171	ENSMUSG00000032572	ENSMUSG00000037474
ENSMUSG00000085399	ENSMUSG00000032589	ENSMUSG00000037544
ENSMUSG00000085421	ENSMUSG00000032595	ENSMUSG00000037572
ENSMUSG00000085761	ENSMUSG00000032656	ENSMUSG00000037580
ENSMUSG00000085823	ENSMUSG00000032725	ENSMUSG00000037628
ENSMUSG00000085844	ENSMUSG00000032854	ENSMUSG00000037725
ENSMUSG00000085893	ENSMUSG00000032878	ENSMUSG00000037788
ENSMUSG00000086867	ENSMUSG00000033036	ENSMUSG00000037872
ENSMUSG00000086938	ENSMUSG00000033688	ENSMUSG00000037887
ENSMUSG00000087175	ENSMUSG00000033762	ENSMUSG00000037904
ENSMUSG00000087259	ENSMUSG00000033826	ENSMUSG00000038267
ENSMUSG00000087590	ENSMUSG00000033847	ENSMUSG00000038357
ENSMUSG00000088639	ENSMUSG00000033952	ENSMUSG00000038695
ENSMUSG00000088856	ENSMUSG00000034039	ENSMUSG00000038725
ENSMUSG00000089727	ENSMUSG00000034059	ENSMUSG00000038871
ENSMUSG00000089929	ENSMUSG00000034127	ENSMUSG00000038893
ENSMUSG00000089942	ENSMUSG00000034161	ENSMUSG00000038943
ENSMUSG00000090103	ENSMUSG00000034205	ENSMUSG00000039187
ENSMUSG00000090192	ENSMUSG00000034248	ENSMUSG00000039236
ENSMUSG00000090252	ENSMUSG00000034311	ENSMUSG00000039253
ENSMUSG00000090254	ENSMUSG00000034449	ENSMUSG00000039396
ENSMUSG00000090338	ENSMUSG00000034656	ENSMUSG00000039452
ENSMUSG00000091491	ENSMUSG00000034685	ENSMUSG00000039652
ENSMUSG00000091542	ENSMUSG00000034709	ENSMUSG00000039787
ENSMUSG00000091695	ENSMUSG00000034883	ENSMUSG00000040010
ENSMUSG00000091844	ENSMUSG00000034997	ENSMUSG00000040084
ENSMUSG00000091998	ENSMUSG00000035206	ENSMUSG00000040152
ENSMUSG00000092072	ENSMUSG00000035246	ENSMUSG00000040204
ENSMUSG00000092077	ENSMUSG00000035262	ENSMUSG00000040314
ENSMUSG00000092340	ENSMUSG00000035407	ENSMUSG00000040435
ENSMUSG00000092591	ENSMUSG00000035455	ENSMUSG00000040466
ENSMUSG00000092618	ENSMUSG00000035472	ENSMUSG00000040557
ENSMUSG00000093553	ENSMUSG00000035818	ENSMUSG00000040809
ENSMUSG00000093843	ENSMUSG00000036002	ENSMUSG00000040859
ENSMUSG00000093894	ENSMUSG00000036036	ENSMUSG00000041064
ENSMUSG00000093909	ENSMUSG00000036172	ENSMUSG00000041219
ENSMUSG00000093963	ENSMUSG00000036185	ENSMUSG00000041431
ENSMUSG00000094016	ENSMUSG00000036322	ENSMUSG00000041498
ENSMUSG00000094094	ENSMUSG00000036352	ENSMUSG00000041842
ENSMUSG00000094198	ENSMUSG00000036377	ENSMUSG00000041895
ENSMUSG00000094262	ENSMUSG00000036390	ENSMUSG00000042331
ENSMUSG00000094649	ENSMUSG00000036687	ENSMUSG00000042333
ENSMUSG00000094651	ENSMUSG00000036718	ENSMUSG00000042453
ENSMUSG00000094652	ENSMUSG00000036777	ENSMUSG00000042476
ENSMUSG00000094655	ENSMUSG00000036825	ENSMUSG00000042489
ENSMUSG00000094686	ENSMUSG00000036882	ENSMUSG00000042510
ENSMUSG00000094862	ENSMUSG00000036899	ENSMUSG00000042680
ENSMUSG00000095028	ENSMUSG00000037336	ENSMUSG00000042744
ENSMUSG00000095280	ENSMUSG00000037415	ENSMUSG00000043953
ENSMUSG00000095285	ENSMUSG00000037544	ENSMUSG00000044201
ENSMUSG00000095315	ENSMUSG00000037577	ENSMUSG00000044468
ENSMUSG00000095325	ENSMUSG00000037583	ENSMUSG00000044573
ENSMUSG00000095348	ENSMUSG00000037628	ENSMUSG00000044792
ENSMUSG00000095351	ENSMUSG00000037852	ENSMUSG00000045316
ENSMUSG00000095630	ENSMUSG00000037872	ENSMUSG00000045328
ENSMUSG00000095675	ENSMUSG00000037887	ENSMUSG00000045629
ENSMUSG00000095730	ENSMUSG00000037904	ENSMUSG00000046179
ENSMUSG00000095736	ENSMUSG00000038020	ENSMUSG00000046295
ENSMUSG00000095863	ENSMUSG00000038217	ENSMUSG00000046404
ENSMUSG00000096078	ENSMUSG00000038224	ENSMUSG00000046591
ENSMUSG00000096108	ENSMUSG00000038267	ENSMUSG00000046806
ENSMUSG00000096233	ENSMUSG00000038357	ENSMUSG00000047040
ENSMUSG00000096326	ENSMUSG00000038370	ENSMUSG00000047139
ENSMUSG00000096349	ENSMUSG00000038379	ENSMUSG00000047181
ENSMUSG00000096385	ENSMUSG00000038422	ENSMUSG00000047246
ENSMUSG00000096422	ENSMUSG00000038486	ENSMUSG00000047446
ENSMUSG00000096438	ENSMUSG00000038583	ENSMUSG00000047534
ENSMUSG00000096525	ENSMUSG00000038637	ENSMUSG00000047648
ENSMUSG00000096577	ENSMUSG00000038725	ENSMUSG00000048327
ENSMUSG00000096580	ENSMUSG00000038859	ENSMUSG00000048922
ENSMUSG00000096715	ENSMUSG00000038871	ENSMUSG00000049287
ENSMUSG00000096833	ENSMUSG00000038997	ENSMUSG00000049409
ENSMUSG00000096862	ENSMUSG00000039236	ENSMUSG00000049577
ENSMUSG00000097148	ENSMUSG00000039253	ENSMUSG00000049687
ENSMUSG00000097276	ENSMUSG00000039313	ENSMUSG00000049932
ENSMUSG00000097635	ENSMUSG00000039347	ENSMUSG00000050157
ENSMUSG00000097636	ENSMUSG00000039396	ENSMUSG00000050410
ENSMUSG00000097694	ENSMUSG00000039533	ENSMUSG00000050549
ENSMUSG00000098197	ENSMUSG00000039542	ENSMUSG00000050761
ENSMUSG00000098292	ENSMUSG00000039620	ENSMUSG00000050788
ENSMUSG00000098900	ENSMUSG00000039653	ENSMUSG00000050982
ENSMUSG00000098934	ENSMUSG00000039787	ENSMUSG00000051378
ENSMUSG00000099241	ENSMUSG00000039798	ENSMUSG00000051627
ENSMUSG00000099587	ENSMUSG00000040165	ENSMUSG00000051727
ENSMUSG00000100586	ENSMUSG00000040187	ENSMUSG00000051748
ENSMUSG00000101219	ENSMUSG00000040197	ENSMUSG00000051839
ENSMUSG00000101964	ENSMUSG00000040314	ENSMUSG00000051910
ENSMUSG00000102155	ENSMUSG00000040435	ENSMUSG00000052212
ENSMUSG00000102175	ENSMUSG00000040594	ENSMUSG00000052270
ENSMUSG00000102253	ENSMUSG00000040657	ENSMUSG00000052565
ENSMUSG00000102365	ENSMUSG00000040950	ENSMUSG00000053279
ENSMUSG00000102461	ENSMUSG00000041237	ENSMUSG00000054428
ENSMUSG00000102721	ENSMUSG00000041329	ENSMUSG00000054619
ENSMUSG00000102785	ENSMUSG00000041431	ENSMUSG00000055639
ENSMUSG00000102805	ENSMUSG00000041498	ENSMUSG00000056054
ENSMUSG00000102871	ENSMUSG00000041544	ENSMUSG00000056071
ENSMUSG00000102882	ENSMUSG00000041842	ENSMUSG00000056091
ENSMUSG00000102979	ENSMUSG00000041957	ENSMUSG00000056394
ENSMUSG00000103075	ENSMUSG00000042066	ENSMUSG00000056895
ENSMUSG00000103527	ENSMUSG00000042215	ENSMUSG00000058290
ENSMUSG00000103706	ENSMUSG00000042331	ENSMUSG00000058385
ENSMUSG00000103998	ENSMUSG00000042389	ENSMUSG00000058773
ENSMUSG00000104063	ENSMUSG00000042453	ENSMUSG00000058794
ENSMUSG00000104268	ENSMUSG00000042476	ENSMUSG00000059089
ENSMUSG00000104452	ENSMUSG00000042489	ENSMUSG00000059336
ENSMUSG00000104488	ENSMUSG00000042581	ENSMUSG00000060093
ENSMUSG00000104592	ENSMUSG00000042678	ENSMUSG00000060981
ENSMUSG00000104626	ENSMUSG00000042680	ENSMUSG00000061482
ENSMUSG00000105025	ENSMUSG00000042686	ENSMUSG00000061615
ENSMUSG00000105041	ENSMUSG00000042734	ENSMUSG00000062248
ENSMUSG00000105096	ENSMUSG00000042745	ENSMUSG00000062727
ENSMUSG00000105134	ENSMUSG00000043993	ENSMUSG00000062729
ENSMUSG00000105277	ENSMUSG00000044338	ENSMUSG00000063021
ENSMUSG00000105366	ENSMUSG00000044352	ENSMUSG00000063447
ENSMUSG00000105750	ENSMUSG00000044468	ENSMUSG00000063856
ENSMUSG00000105873	ENSMUSG00000044676	ENSMUSG00000063952
ENSMUSG00000106093	ENSMUSG00000044726	ENSMUSG00000064032
ENSMUSG00000106734	ENSMUSG00000044792	ENSMUSG00000064225
ENSMUSG00000107428	ENSMUSG00000045094	ENSMUSG00000067455
ENSMUSG00000107556	ENSMUSG00000045273	ENSMUSG00000068115
ENSMUSG00000107715	ENSMUSG00000045316	ENSMUSG00000068606
ENSMUSG00000107741	ENSMUSG00000045629	ENSMUSG00000069268
ENSMUSG00000107894	ENSMUSG00000045699	ENSMUSG00000069272
ENSMUSG00000108161	ENSMUSG00000046152	ENSMUSG00000069300
ENSMUSG00000108166	ENSMUSG00000046179	ENSMUSG00000069303
ENSMUSG00000108239	ENSMUSG00000046262	ENSMUSG00000069305
ENSMUSG00000108289	ENSMUSG00000046295	ENSMUSG00000069307
ENSMUSG00000108348	ENSMUSG00000046634	ENSMUSG00000069308
ENSMUSG00000108980	ENSMUSG00000047037	ENSMUSG00000069814
ENSMUSG00000109675	ENSMUSG00000047139	ENSMUSG00000069919
ENSMUSG00000109680	ENSMUSG00000047443	ENSMUSG00000070717
ENSMUSG00000109827	ENSMUSG00000047648	ENSMUSG00000071478
ENSMUSG00000109953	ENSMUSG00000047749	ENSMUSG00000071711
ENSMUSG00000110105	ENSMUSG00000047766	ENSMUSG00000072082
ENSMUSG00000110243	ENSMUSG00000048376	ENSMUSG00000072589
ENSMUSG00000110469	ENSMUSG00000048387	ENSMUSG00000072980
ENSMUSG00000110542	ENSMUSG00000048442	ENSMUSG00000073063
ENSMUSG00000111202	ENSMUSG00000048498	ENSMUSG00000073542
ENSMUSG00000111561	ENSMUSG00000048916	ENSMUSG00000073940
ENSMUSG00000111619	ENSMUSG00000048988	ENSMUSG00000074093
ENSMUSG00000111737	ENSMUSG00000049409	ENSMUSG00000074476
ENSMUSG00000112082	ENSMUSG00000049687	ENSMUSG00000075184
ENSMUSG00000112836	ENSMUSG00000049932	ENSMUSG00000075502
ENSMUSG00000113136	ENSMUSG00000050157	ENSMUSG00000075704
ENSMUSG00000113386	ENSMUSG00000050550	ENSMUSG00000076652
ENSMUSG00000113587	ENSMUSG00000050788	ENSMUSG00000078588
ENSMUSG00000113669	ENSMUSG00000050808	ENSMUSG00000078653
ENSMUSG00000114141	ENSMUSG00000051378	ENSMUSG00000078851
ENSMUSG00000114190	ENSMUSG00000051502	ENSMUSG00000079418
ENSMUSG00000114761	ENSMUSG00000051528	ENSMUSG00000079478
ENSMUSG00000115354	ENSMUSG00000051726	ENSMUSG00000079553
ENSMUSG00000115969	ENSMUSG00000051811	ENSMUSG00000079557
ENSMUSG00000116207	ENSMUSG00000051839	ENSMUSG00000080712
ENSMUSG00000116815	ENSMUSG00000051860	ENSMUSG00000081058
ENSMUSG00000116953	ENSMUSG00000051910	ENSMUSG00000081671
ENSMUSG00000117371	ENSMUSG00000052212	ENSMUSG00000083457
ENSMUSG00000117465	ENSMUSG00000052305	ENSMUSG00000086741
ENSMUSG00000118064	ENSMUSG00000052698	ENSMUSG00000087119
ENSMUSG00000118084	ENSMUSG00000053279	ENSMUSG00000087175
ENSMUSG00000118252	ENSMUSG00000054000	ENSMUSG00000090113
ENSMUSG00000118394	ENSMUSG00000054162	ENSMUSG00000090523
ENSMUSG00000118425	ENSMUSG00000054191	ENSMUSG00000091650
ENSMUSG00000118433	ENSMUSG00000054434	ENSMUSG00000091694
ENSMUSG00000118434	ENSMUSG00000054690	ENSMUSG00000093656
ENSMUSG00000118458	ENSMUSG00000054752	ENSMUSG00000093726
ENSMUSG00000118633	ENSMUSG00000054793	ENSMUSG00000094338
	ENSMUSG00000055033	ENSMUSG00000095865
	ENSMUSG00000055202	ENSMUSG00000096108
	ENSMUSG00000055254	ENSMUSG00000096351
	ENSMUSG00000055341	ENSMUSG00000096917
	ENSMUSG00000055385	ENSMUSG00000096982
	ENSMUSG00000055639	ENSMUSG00000097346
	ENSMUSG00000056054	ENSMUSG00000097603
	ENSMUSG00000056071	ENSMUSG00000099517
	ENSMUSG00000056091	ENSMUSG00000099519
	ENSMUSG00000056427	ENSMUSG00000099583
	ENSMUSG00000056632	ENSMUSG00000100210
	ENSMUSG00000056738	ENSMUSG00000100382
	ENSMUSG00000056895	ENSMUSG00000101316
	ENSMUSG00000057657	ENSMUSG00000101355
	ENSMUSG00000058620	ENSMUSG00000101972
	ENSMUSG00000058622	ENSMUSG00000102051
	ENSMUSG00000058773	ENSMUSG00000102611
	ENSMUSG00000058794	ENSMUSG00000103529
	ENSMUSG00000059040	ENSMUSG00000105199
	ENSMUSG00000059058	ENSMUSG00000106287
	ENSMUSG00000059336	ENSMUSG00000106973
	ENSMUSG00000059775	ENSMUSG00000107719
	ENSMUSG00000059974	ENSMUSG00000108943
	ENSMUSG00000060093	ENSMUSG00000109086
	ENSMUSG00000060180	ENSMUSG00000109910
	ENSMUSG00000060212	ENSMUSG00000110615
	ENSMUSG00000060572	ENSMUSG00000111340
	ENSMUSG00000060843	ENSMUSG00000111565
	ENSMUSG00000060913	ENSMUSG00000112071
	ENSMUSG00000061186	ENSMUSG00000112569
	ENSMUSG00000061311	ENSMUSG00000114279
	ENSMUSG00000061615	ENSMUSG00000114456
	ENSMUSG00000061878	ENSMUSG00000115007
	ENSMUSG00000061928	ENSMUSG00000115306
	ENSMUSG00000061991	ENSMUSG00000115387
	ENSMUSG00000062329	ENSMUSG00000116207
	ENSMUSG00000062353	ENSMUSG00000117917
	ENSMUSG00000062518	ENSMUSG00000117988
	ENSMUSG00000062727	ENSMUSG00000118038
	ENSMUSG00000062729	ENSMUSG00000118061
	ENSMUSG00000063021	ENSMUSG00000118138
	ENSMUSG00000063275	ENSMUSG00000118369
	ENSMUSG00000063455	ENSMUSG00000118653
	ENSMUSG00000063903
	ENSMUSG00000063929
	ENSMUSG00000064141
	ENSMUSG00000064193
	ENSMUSG00000064208
	ENSMUSG00000064220
	ENSMUSG00000064288
	ENSMUSG00000065401
	ENSMUSG00000065999
	ENSMUSG00000066000
	ENSMUSG00000066007
	ENSMUSG00000066392
	ENSMUSG00000066443
	ENSMUSG00000066748
	ENSMUSG00000067058
	ENSMUSG00000067189
	ENSMUSG00000067206
	ENSMUSG00000067220
	ENSMUSG00000067242
	ENSMUSG00000067455
	ENSMUSG00000067608
	ENSMUSG00000067889
	ENSMUSG00000067919
	ENSMUSG00000068115
	ENSMUSG00000068397
	ENSMUSG00000068407
	ENSMUSG00000068876
	ENSMUSG00000069083
	ENSMUSG00000069117
	ENSMUSG00000069265
	ENSMUSG00000069268
	ENSMUSG00000069272
	ENSMUSG00000069274
	ENSMUSG00000069300
	ENSMUSG00000069303
	ENSMUSG00000069306
	ENSMUSG00000069307
	ENSMUSG00000069308
	ENSMUSG00000069309
	ENSMUSG00000069310
	ENSMUSG00000069441
	ENSMUSG00000069607
	ENSMUSG00000069609
	ENSMUSG00000069793
	ENSMUSG00000069873
	ENSMUSG00000069917
	ENSMUSG00000069919
	ENSMUSG00000070392
	ENSMUSG00000070713
	ENSMUSG00000070717
	ENSMUSG00000070802
	ENSMUSG00000070803
	ENSMUSG00000070873
	ENSMUSG00000070908
	ENSMUSG00000071226
	ENSMUSG00000071234
	ENSMUSG00000071478
	ENSMUSG00000071516
	ENSMUSG00000071723
	ENSMUSG00000071847
	ENSMUSG00000071867
	ENSMUSG00000072082
	ENSMUSG00000072421
	ENSMUSG00000072769
	ENSMUSG00000072980
	ENSMUSG00000073063
	ENSMUSG00000073400
	ENSMUSG00000073600
	ENSMUSG00000073647
	ENSMUSG00000073705
	ENSMUSG00000073856
	ENSMUSG00000073940
	ENSMUSG00000074113
	ENSMUSG00000074280
	ENSMUSG00000074384
	ENSMUSG00000074968
	ENSMUSG00000075184
	ENSMUSG00000075302
	ENSMUSG00000075391
	ENSMUSG00000075420
	ENSMUSG00000075502
	ENSMUSG00000075704
	ENSMUSG00000076434
	ENSMUSG00000076533
	ENSMUSG00000076539
	ENSMUSG00000076665
	ENSMUSG00000077095
	ENSMUSG00000077131
	ENSMUSG00000077758
	ENSMUSG00000078139
	ENSMUSG00000078307
	ENSMUSG00000078496
	ENSMUSG00000078497
	ENSMUSG00000078498
	ENSMUSG00000078500
	ENSMUSG00000078503
	ENSMUSG00000078588
	ENSMUSG00000078816
	ENSMUSG00000078851
	ENSMUSG00000078864
	ENSMUSG00000078942
	ENSMUSG00000079162
	ENSMUSG00000079173
	ENSMUSG00000079343
	ENSMUSG00000079418
	ENSMUSG00000079507
	ENSMUSG00000079557
	ENSMUSG00000080076
	ENSMUSG00000080405
	ENSMUSG00000080712
	ENSMUSG00000080845
	ENSMUSG00000080999
	ENSMUSG00000081043
	ENSMUSG00000081058
	ENSMUSG00000081077
	ENSMUSG00000081087
	ENSMUSG00000081113
	ENSMUSG00000081126
	ENSMUSG00000081522
	ENSMUSG00000081662
	ENSMUSG00000081723
	ENSMUSG00000082082
	ENSMUSG00000082101
	ENSMUSG00000082319
	ENSMUSG00000082352
	ENSMUSG00000082399
	ENSMUSG00000083017
	ENSMUSG00000083038
	ENSMUSG00000083212
	ENSMUSG00000083216
	ENSMUSG00000083285
	ENSMUSG00000083457
	ENSMUSG00000083609
	ENSMUSG00000083774
	ENSMUSG00000083805
	ENSMUSG00000083833
	ENSMUSG00000083875
	ENSMUSG00000083902
	ENSMUSG00000084127
	ENSMUSG00000084272
	ENSMUSG00000084383
	ENSMUSG00000084403
	ENSMUSG00000084756
	ENSMUSG00000084862
	ENSMUSG00000084869
	ENSMUSG00000084880
	ENSMUSG00000084939
	ENSMUSG00000085006
	ENSMUSG00000085101
	ENSMUSG00000085118
	ENSMUSG00000085478
	ENSMUSG00000085634
	ENSMUSG00000085744
	ENSMUSG00000085835
	ENSMUSG00000086003
	ENSMUSG00000086153
	ENSMUSG00000086438
	ENSMUSG00000086654
	ENSMUSG00000086675
	ENSMUSG00000086741
	ENSMUSG00000086804
	ENSMUSG00000086912
	ENSMUSG00000086968
	ENSMUSG00000087060
	ENSMUSG00000087247
	ENSMUSG00000087352
	ENSMUSG00000087362
	ENSMUSG00000087373
	ENSMUSG00000087384
	ENSMUSG00000087442
	ENSMUSG00000087528
	ENSMUSG00000088226
	ENSMUSG00000088356
	ENSMUSG00000089054
	ENSMUSG00000089722
	ENSMUSG00000089753
	ENSMUSG00000089791
	ENSMUSG00000090043
	ENSMUSG00000090079
	ENSMUSG00000090113
	ENSMUSG00000090115
	ENSMUSG00000090160
	ENSMUSG00000090215
	ENSMUSG00000090226
	ENSMUSG00000090387
	ENSMUSG00000090523
	ENSMUSG00000090544
	ENSMUSG00000090812
	ENSMUSG00000091285
	ENSMUSG00000091415
	ENSMUSG00000091679
	ENSMUSG00000091950
	ENSMUSG00000091957
	ENSMUSG00000092200
	ENSMUSG00000092278
	ENSMUSG00000092415
	ENSMUSG00000092560
	ENSMUSG00000092572
	ENSMUSG00000093598
	ENSMUSG00000093656
	ENSMUSG00000093846
	ENSMUSG00000093900
	ENSMUSG00000093954
	ENSMUSG00000094009
	ENSMUSG00000094067
	ENSMUSG00000094338
	ENSMUSG00000094344
	ENSMUSG00000094356
	ENSMUSG00000094497
	ENSMUSG00000094506
	ENSMUSG00000094526
	ENSMUSG00000094943
	ENSMUSG00000095079
	ENSMUSG00000095366
	ENSMUSG00000095457
	ENSMUSG00000095514
	ENSMUSG00000095562
	ENSMUSG00000095884
	ENSMUSG00000096010
	ENSMUSG00000096065
	ENSMUSG00000096134
	ENSMUSG00000096354
	ENSMUSG00000096403
	ENSMUSG00000096440
	ENSMUSG00000096632
	ENSMUSG00000096880
	ENSMUSG00000096917
	ENSMUSG00000096982
	ENSMUSG00000097150
	ENSMUSG00000097385
	ENSMUSG00000097405
	ENSMUSG00000097414
	ENSMUSG00000097497
	ENSMUSG00000097591
	ENSMUSG00000097603
	ENSMUSG00000097675
	ENSMUSG00000097893
	ENSMUSG00000097970
	ENSMUSG00000097993
	ENSMUSG00000098021
	ENSMUSG00000098248
	ENSMUSG00000098270
	ENSMUSG00000098318
	ENSMUSG00000098728
	ENSMUSG00000098800
	ENSMUSG00000098975
	ENSMUSG00000099027
	ENSMUSG00000099338
	ENSMUSG00000099375
	ENSMUSG00000099474
	ENSMUSG00000099517
	ENSMUSG00000099583
	ENSMUSG00000100007
	ENSMUSG00000100129
	ENSMUSG00000100174
	ENSMUSG00000100210
	ENSMUSG00000100253
	ENSMUSG00000100382
	ENSMUSG00000100720
	ENSMUSG00000100750
	ENSMUSG00000100779
	ENSMUSG00000100801
	ENSMUSG00000101210
	ENSMUSG00000101355
	ENSMUSG00000101823
	ENSMUSG00000101935
	ENSMUSG00000101972
	ENSMUSG00000102246
	ENSMUSG00000102371
	ENSMUSG00000102509
	ENSMUSG00000102611
	ENSMUSG00000102614
	ENSMUSG00000102660
	ENSMUSG00000102712
	ENSMUSG00000103043
	ENSMUSG00000103065
	ENSMUSG00000103067
	ENSMUSG00000103280
	ENSMUSG00000103464
	ENSMUSG00000103720
	ENSMUSG00000103769
	ENSMUSG00000103788
	ENSMUSG00000103804
	ENSMUSG00000103837
	ENSMUSG00000103926
	ENSMUSG00000103953
	ENSMUSG00000103985
	ENSMUSG00000103999
	ENSMUSG00000104031
	ENSMUSG00000104306
	ENSMUSG00000104309
	ENSMUSG00000104371
	ENSMUSG00000104405
	ENSMUSG00000104467
	ENSMUSG00000104514
	ENSMUSG00000104652
	ENSMUSG00000104734
	ENSMUSG00000104735
	ENSMUSG00000104763
	ENSMUSG00000104801
	ENSMUSG00000104935
	ENSMUSG00000104951
	ENSMUSG00000104968
	ENSMUSG00000104990
	ENSMUSG00000105263
	ENSMUSG00000105345
	ENSMUSG00000105461
	ENSMUSG00000105546
	ENSMUSG00000105624
	ENSMUSG00000105766
	ENSMUSG00000106027
	ENSMUSG00000106032
	ENSMUSG00000106200
	ENSMUSG00000106234
	ENSMUSG00000106287
	ENSMUSG00000106306
	ENSMUSG00000106424
	ENSMUSG00000106438
	ENSMUSG00000107026
	ENSMUSG00000107092
	ENSMUSG00000107430
	ENSMUSG00000107658
	ENSMUSG00000107719
	ENSMUSG00000107755
	ENSMUSG00000107799
	ENSMUSG00000107835
	ENSMUSG00000107842
	ENSMUSG00000107992
	ENSMUSG00000108068
	ENSMUSG00000108168
	ENSMUSG00000108171
	ENSMUSG00000108195
	ENSMUSG00000108232
	ENSMUSG00000108358
	ENSMUSG00000108489
	ENSMUSG00000108596
	ENSMUSG00000108709
	ENSMUSG00000109257
	ENSMUSG00000109517
	ENSMUSG00000109561
	ENSMUSG00000109744
	ENSMUSG00000109821
	ENSMUSG00000109893
	ENSMUSG00000109910
	ENSMUSG00000110298
	ENSMUSG00000110331
	ENSMUSG00000110393
	ENSMUSG00000110615
	ENSMUSG00000110669
	ENSMUSG00000110735
	ENSMUSG00000111141
	ENSMUSG00000111300
	ENSMUSG00000111340
	ENSMUSG00000111346
	ENSMUSG00000111465
	ENSMUSG00000111565
	ENSMUSG00000111749
	ENSMUSG00000111756
	ENSMUSG00000112003
	ENSMUSG00000112071
	ENSMUSG00000112481
	ENSMUSG00000112569
	ENSMUSG00000112711
	ENSMUSG00000112880
	ENSMUSG00000112907
	ENSMUSG00000112908
	ENSMUSG00000113047
	ENSMUSG00000113061
	ENSMUSG00000113123
	ENSMUSG00000113255
	ENSMUSG00000113411
	ENSMUSG00000113536
	ENSMUSG00000113725
	ENSMUSG00000113778
	ENSMUSG00000113961
	ENSMUSG00000114025
	ENSMUSG00000114279
	ENSMUSG00000114442
	ENSMUSG00000114456
	ENSMUSG00000114576
	ENSMUSG00000114722
	ENSMUSG00000114771
	ENSMUSG00000114882
	ENSMUSG00000114961
	ENSMUSG00000114968
	ENSMUSG00000115161
	ENSMUSG00000115306
	ENSMUSG00000115387
	ENSMUSG00000115568
	ENSMUSG00000115570
	ENSMUSG00000115575
	ENSMUSG00000115725
	ENSMUSG00000115764
	ENSMUSG00000115834
	ENSMUSG00000115979
	ENSMUSG00000116116
	ENSMUSG00000116579
	ENSMUSG00000116581
	ENSMUSG00000116627
	ENSMUSG00000116832
	ENSMUSG00000116842
	ENSMUSG00000117262
	ENSMUSG00000117534
	ENSMUSG00000117666
	ENSMUSG00000117749
	ENSMUSG00000117760
	ENSMUSG00000117848
	ENSMUSG00000117917
	ENSMUSG00000117947
	ENSMUSG00000117988
	ENSMUSG00000118038
	ENSMUSG00000118241
	ENSMUSG00000118281
	ENSMUSG00000118332
	ENSMUSG00000118341
	ENSMUSG00000118382
	ENSMUSG00000118632
	487 genes
	53 genes
