# Supplementary material for: Comparative Transcriptome Analysis of the Expression of Antioxidant and Immunity Genes in the Spleen of a Cyanidin 3-O-Glucoside-Treated Alzheimer’s Mouse Model
Source: Antioxidants (Basel). 2021 Sep 9;10(9):1435. doi: 10.3390/antiox10091435 (PMC8472539; doi:10.3390/antiox10091435)
Supplement: Supplementary file 1 [file antioxidants-10-01435-s001.zip › Supplimentary_TableS1-S8updated.xlsx]

## Sheet: Sheet1
Table S1: Primer sequences used in RT-PCR experiment
Sr. No.	Primer Sequences	Direction of Primer	Gene name
1	GTTCCCATTCGCAAACCAGT	LEFT PRIMER	slpi
	TCAGGGATCAGGCTCACATC	RIGHT PRIMER
2	CCCTCCACCTCTGCTGTTAA	LEFT PRIMER	oas2
	AAAGGCCTGTAACCCCTCTC	RIGHT PRIMER
3	AGTGTGAAGTGCAGCTGTTG	LEFT PRIMER	immunoglobulin heavy variable V11-2
	CCAATCCACTCCAGGGTCTT	RIGHT PRIMER
4	ACTGCCTGCAAAGAAATGGG	LEFT PRIMER	cd209e
	ACCATCCAGCCAGTACCATT	RIGHT PRIMER
5	TTGACAAGATCCTGGACCCC	LEFT PRIMER	D630045J12Rik
	TGGTGATGAGTCGGTCCTTC	RIGHT PRIMER
6	AGGAAAGCAGACATCGACCT	LEFT PRIMER	Gm10260
	AGAACCTGGCTGTACTTCCC	RIGHT PRIMER
7	AGTCTCCATCCTCCCTGAGT	LEFT PRIMER	immunoglobulin kappa variable 8-28
	TGCCCCGTAGATCAACAGTT	RIGHT PRIMER
Table S2a: Results of 444 DEGs (up-regulated in Wt mice Vs ADM mice comparison) according to molecular function in panther enrichment analysis for molecular function
Sr. No.	Molecular Function	No. of Genes
1	molecular transducer activity (GO:0060089)	11	4.5%	6.3%
2	molecular adaptor activity (GO:0060090)	1	0.4%	0.6%
3	binding (GO:0005488)	77	31.3%	44.0%
4	structural molecule activity (GO:0005198)	2	0.8%	1.1%
5	molecular function regulator (GO:0098772)	25	10.2%	14.3%
6	catalytic activity (GO:0003824)	43	17.5%	24.6%
7	transporter activity (GO:0005215)	16	6.5%	9.1%
Table S2b: Results of 444 DEGs (up-regulated in Wt mice Vs ADM mice comparison) according to cellular component in panther enrichment analysis for cellular components
Sr. No.	Cellular Component	No. of Genes
1	cellular anatomical entity (GO:0110165)	155	63.0%	63.5%
2	protein-containing complex (GO:0032991)	30	12.2%	12.3%
3	intracellular (GO:0005622)	59	24.0%	24.2%
Table S2c: Results of 444 DEGs (up-regulated in Wt mice Vs ADM mice comparison) according to protein class in panther enrichment analysis for protein class
Sr. No.	Protein Class	No. of Genes
1	cytoskeletal protein (PC00085)	1	0.4%	0.6%
2	transporter (PC00227)	16	6.5%	9.4%
3	scaffold/adaptor protein (PC00226)	2	0.8%	1.2%
4	cell adhesion molecule (PC00069)	4	1.6%	2.4%
5	nucleic acid metabolism protein (PC00171)	3	1.2%	1.8%
6	intercellular signal molecule (PC00207)	13	5.3%	7.6%
7	protein-binding activity modulator (PC00095)	9	3.7%	5.3%
8	gene-specific transcriptional regulator (PC00264)	4	1.6%	2.4%
9	defense/immunity protein (PC00090)	44	17.9%	25.9%
10	translational protein (PC00263)	3	1.2%	1.8%
11	metabolite interconversion enzyme (PC00262)	30	12.2%	17.6%
12	protein modifying enzyme (PC00260)	13	5.3%	7.6%
13	chromatin/chromatin-binding	or -regulatory protein (PC00077)	2	0.8%	0.012
14	membrane traffic protein (PC00150)	6	2.4%	3.5%
15	cell junction protein (PC00070)	1	0.004	0.6%
16	structural protein (PC00211)	1	0.4%	0.6%
17	storage protein (PC00210)	1	0.4%	0.6%
18	transmembrane signal receptor (PC00197)	17	6.9%	10.0%
Table S2d: Results of 444 DEGs (up-regulated in Wt mice Vs ADM mice comparison) according to pathways in panther enrichment analysis for pathways
Sr. No.	Pathways	No. of Genes
1	N-acetylglucosamine metabolism (P02756)	1	0.4%	2.0%
2	Axon guidance mediated by semaphorins (P00007)	1	0.4%	2.0%
3	Apoptosis signaling pathway (P00006)	4	1.6%	7.8%
4	Histamine H1 receptor mediated signaling pathway (P04385)	1	0.4%	2.0%
5	Interleukin signaling pathway (P00036)	1	0.4%	2.0%
6	Gamma-aminobutyric acid synthesis (P04384)	1	0.4%	2.0%
7	Alzheimer disease-presenilin pathway (P00004)	1	0.4%	2.0%
8	Integrin signalling pathway (P00034)	1	0.4%	2.0%
9	Alzheimer disease-amyloid secretase pathway (P00003)	1	0.4%	2.0%
10	Adrenaline and noradrenaline biosynthesis (P00001)	2	0.8%	3.9%
11	Inflammation mediated by chemokine and cytokine signaling pathway (P00031)	11	4.5%	21.6%
12	Endothelin signaling pathway (P00019)	2	0.8%	3.9%
13	Parkinson disease (P00049)	1	0.4%	2.0%
14	Gonadotropin-releasing hormone receptor pathway (P06664)	1	0.4%	2.0%
15	PI3 kinase pathway (P00048)	1	0.4%	2.0%
16	Thyrotropin-releasing hormone receptor signaling pathway (P04394)	1	0.4%	2.0%
17	Oxidative stress response (P00046)	1	0.4%	2.0%
18	Cell cycle (P00013)	1	0.4%	2.0%
19	Oxytocin receptor mediated signaling pathway (P04391)	1	0.4%	2.0%
20	Cadherin signaling pathway (P00012)	1	0.4%	2.0%
21	Blood coagulation (P00011)	1	0.4%	2.0%
22	CCKR signaling map (P06959)	2	0.8%	3.9%
23	Huntington disease (P00029)	2	0.8%	3.9%
24	Heterotrimeric G-protein signaling pathway-Gq alpha and Go alpha mediated pathway (P00027)	1	0.4%	2.0%
25	Wnt signaling pathway (P00057)	2	0.8%	3.9%
26	Heterotrimeric G-protein signaling pathway-Gi alpha and Gs alpha mediated pathway (P00026)	2	0.8%	3.9%
27	5HT2 type receptor mediated signaling pathway (P04374)	1	0.4%	2.0%
28	Transcription regulation by bZIP transcription factor (P00055)	1	0.4%	2.0%
29	Glycolysis (P00024)	2	0.8%	3.9%
30	Toll receptor signaling pathway (P00054)	1	0.4%	2.0%
31	TGF-beta signaling pathway (P00052)	1	0.4%	2.0%
Table S2e: Results of 444 DEGs (up-regulated in Wt mice Vs ADM mice comparison) in Reactome pathway analysis
TermID	TermGeneNum	ObservedGeneNum	ExpectedGeneNum	RichFactor	rawP	adjP	TermName	GeneList
R-MMU-380108	53	6	0.495779	12.1022	2.23422e-05	0.00129585	Chemokine_receptors_bind_chemokines	Ccr8;Cxcl2;Cxcl9;Ccl21b;Ccl3;Ccl21a;
R-MMU-2424491	52	6	0.569473	10.5361	1.99882e-05	0.00129585	DAP12_signaling	H2-Q7;H2-Q6;H2-K1;Klrc1;Klrd1;Klrc2;
R-MMU-2172127	60	6	0.499658	12.0082	4.58104e-05	0.00177134	DAP12_interactions	Klrc2;Klrc1;Klrd1;H2-K1;H2-Q7;H2-Q6;
R-MMU-375276	184	9	2.01506	4.46637	0.000175234	0.00508178	Peptide_ligand-binding_receptors	Avpr1a;F2rl1;Cxcl2;Ccl21b;Ccr8;Ccl21a;Npy1r;Cxcl9;Ccl3;
R-MMU-198933	97	6	0.885238	6.77784	0.000653381	0.0135728	Immunoregulatory_interactions_between_a_Lymphoid_and_a_non-Lymphoid_cell	H2-Q7;H2-Q6;Klrd1;Siglecf;Clec2g;H2-K1;
R-MMU-5660668	4	2	0.043806	45.6558	0.00070204	0.0135728	CLEC7A vs inflammasome_pathway	Il1b;Pycard;
R-MMU-373076	297	10	1.52464	6.55892	0.00146886	0.0243411	Class_A/1_(Rhodopsin-like_receptors)	Ptgfr;Cxcl9;Ccl21b;Cxcl2;F2rl1;Avpr1a;Ccl3;Npy1r;Ccl21a;Ccr8;
R-MMU-1236977	25	3	0.233858	12.8283	0.00245813	0.0259221	Endosomal/Vacuolar_pathway	H2-K1;H2-Q6;H2-Q7;
R-MMU-5669034	25	3	0.248118	12.091	0.00245813	0.0259221	TNFs_bind_their_physiological_receptors	Tnfrsf9;Lta;Tnfrsf4;
R-MMU-168256	1573	30	17.2266	1.7415	0.00180501	0.0259221	Immune_System	Klrd1;Tnfrsf4;Il1r2;Cxcl2;Oasl1;Il21;Clec2g;Nlrp1a;Slpi;Atp6v0d2;H2-Q6;Pira2;H2-Q7;C7;Klrc2;Il1b;Pycard;Pdcd1;Klrc1;H2-K1;Hspa8;Lta;Tnfrsf9;C4b;Il12b;H2-Eb2;Fabp5;Cd44;Dusp7;Siglecf;
R-MMU-168249	926	20	10.141	1.97219	0.00240538	0.0259221	Innate_Immune_System	Klrc2;H2-Q7;Fabp5;Cd44;Siglecf;C7;Dusp7;H2-Q6;Pira2;Nlrp1a;Atp6v0d2;C4b;Slpi;Hspa8;Pycard;H2-K1;Klrc1;Klrd1;Cxcl2;Il1b;
R-MMU-74160	1046	3	11.0972	0.270339	0.00393762	0.0380637	Gene_expression_(Transcription)	Ccnd1;Gsr;Zfp870;
R-MMU-1236974	34	3	0.341319	8.78943	0.00595671	0.0531522	ER-Phagosome_pathway	H2-K1;H2-Q6;H2-Q7;
R-MMU-500792	382	10	1.48163	6.7493	0.00877697	0.0678753	GPCR_ligand_binding	Cxcl2;Ccl21b;Avpr1a;F2rl1;Npy1r;Ccl3;Ccr8;Ccl21a;Ptgfr;Cxcl9;
R-MMU-389948	13	2	0.102327	19.5452	0.00855845	0.0678753	PD-1_signaling	H2-Eb2;Pdcd1;
R-MMU-622312	14	2	0.146931	13.6118	0.0099141	0.0685284	Inflammasomes	Pycard;Nlrp1a;
R-MMU-983170	41	3	0.449008	6.6814	0.010043	0.0685284	Antigen_Presentation:_Folding,_assembly_and_peptide_loading_of_class_I_MHC	H2-Q7;H2-Q6;H2-K1;
R-MMU-422085	15	2	0.006845	292.184	0.0113584	0.0725073	Synthesis,_secretion,_and_deacylation_of_Ghrelin	Pla2g7;Pcsk1;
R-MMU-73857	948	3	9.08419	0.330244	0.0118762	0.0725073	RNA_Polymerase_II_Transcription	Zfp870;Ccnd1;Gsr;
R-MMU-888590	18	2	0.197125	10.1458	0.0162023	0.0939733	GABA_synthesis,_release,_reuptake_and_degradation	Hspa8;Gad1;
R-MMU-8876725	19	2	0.208077	9.61183	0.0179807	0.0993219	Protein_methylation	Rps2;Hspa8;
R-MMU-425393	99	4	1.08419	3.68939	0.0230686	0.116346	Transport_of_inorganic_cations/anions_and_amino_acids/oligopeptides	Slc6a19;Slc7a2;Slc26a11;Slc8a2;
R-MMU-1280215	378	9	4.13963	2.17411	0.0223122	0.116346	Cytokine_Signaling_in_Immune_system	Dusp7;Lta;Tnfrsf9;Il1r2;Il1b;Oasl1;Il12b;Tnfrsf4;Il21;
R-MMU-8979227	24	2	0.032854	60.8754	0.0280145	0.129987	Triglyceride_metabolism	Agmo;Fabp5;
R-MMU-6798695	514	11	5.57039	1.97473	0.0273118	0.129987	Neutrophil_degranulation	Cd44;Fabp5;H2-Q7;Siglecf;H2-Q6;Pira2;Slpi;Hspa8;Pycard;H2-K1;Cxcl2;
R-MMU-418360	25	2	0.233858	8.5522	0.0302368	0.134903	Platelet_calcium_homeostasis	Slc8a2;P2rx3;
R-MMU-212436	830	3	9.08967	0.330045	0.0331726	0.142519	Generic_Transcription_Pathway	Zfp870;Ccnd1;Gsr;
R-MMU-499943	27	2	0.252567	7.91869	0.0348828	0.144514	Interconversion_of_nucleotide_di-_and_triphosphates	Gsr;Ak7;
R-MMU-216083	69	3	0.692676	4.33103	0.0396819	0.158728	Integrin_cell_surface_interactions	Itgb8;Cd44;Spp1;
R-MMU-352230	31	2	0.339493	5.89114	0.0449332	0.173742	Amino_acid_transport_across_the_plasma_membrane	Slc7a2;Slc6a19;
R-MMU-163125	79	3	0.720967	4.16108	0.0554445	0.20747	Post-translational_modification:_synthesis_of_GPI-anchored_proteins	Vnn3;Izumo1r;Lypd6b;
R-MMU-977606	36	2	0.394251	5.07291	0.0587867	0.213102	Regulation_of_Complement_cascade	C4b;C7;
R-MMU-1799339	89	3	0.761465	3.93977	0.0737411	0.259211	SRP-dependent_cotranslational_protein_targeting_to_membrane	Rps18;Rps2;Rpl29;
R-MMU-975956	91	3	0.996578	3.0103	0.0776871	0.26413	Nonsense_Mediated_Decay_(NMD)_independent_of_the_Exon_Junction_Complex_(EJC)	Rpl29;Rps18;Rps2;
R-MMU-1236975	92	3	1.00753	2.97758	0.0796944	0.26413	Antigen_processing-Cross_presentation	H2-K1;H2-Q7;H2-Q6;
R-MMU-72689	98	3	0.50308	5.96327	0.0922049	0.264418	Formation_of_a_pool_of_free_40S_subunits	Rps18;Rps2;Rpl29;
R-MMU-8848021	45	2	0.38501	5.19467	0.0867817	0.264418	Signaling_by_PTK6	Gpnmb;Ccnd1;
R-MMU-5668541	97	3	0.962697	3.11625	0.0900655	0.264418	TNFR2_non-canonical_NF-kB_pathway	Lta;Tnfrsf9;Tnfrsf4;
R-MMU-166658	45	2	0.467146	4.28132	0.0867817	0.264418	Complement_cascade	C7;C4b;
R-MMU-168643	47	2	0.514716	3.88564	0.093458	0.264418	Nucleotide-binding_domain,_leucine_rich_repeat_containing_receptor_(NLR)_signaling_pathways	Nlrp1a;Pycard;
R-MMU-9006927	45	2	0.492813	4.05833	0.0867817	0.264418	Signaling_by_Non-Receptor_Tyrosine_Kinases	Ccnd1;Gpnmb;
R-MMU-112310	48	2	0.010951	182.632	0.0968507	0.267493	Neurotransmitter_release_cycle	Hspa8;Gad1;
R-MMU-975957	111	3	0.506502	5.92298	0.121846	0.272453	Nonsense_Mediated_Decay_(NMD)_enhanced_by_the_Exon_Junction_Complex_(EJC)	Rpl29;Rps18;Rps2;
R-MMU-72649	58	2	0.529318	3.77845	0.132511	0.272453	Translation_initiation_complex_formation	Rps2;Rps18;
R-MMU-2980736	58	2	0.542551	3.68629	0.132511	0.272453	Peptide_hormone_metabolism	Pla2g7;Pcsk1;
R-MMU-8957275	113	3	1.16016	2.58584	0.126687	0.272453	Post-translational_protein_phosphorylation	C4b;Fam20c;Spp1;
R-MMU-418594	346	7	3.55236	1.97052	0.105095	0.272453	G_alpha_(i)_signalling_events	Rgs13;Cxcl9;Ccl21b;Cxcl2;Ccl21a;Ccr8;Npy1r;
R-MMU-156827	108	3	1.14579	2.61828	0.114719	0.272453	L13a-mediated_translational_silencing_of_Ceruloplasmin_expression	Rps18;Rps2;Rpl29;
R-MMU-72613	116	3	1.23066	2.43771	0.134077	0.272453	Eukaryotic_Translation_Initiation	Rpl29;Rps18;Rps2;
R-MMU-72737	116	3	1.23066	2.43771	0.134077	0.272453	Cap-dependent_Translation_Initiation	Rps2;Rps18;Rpl29;
R-MMU-927802	111	3	1.20294	2.49388	0.121846	0.272453	Nonsense-Mediated_Decay_(NMD)	Rps2;Rps18;Rpl29;
R-MMU-72695	51	2	0.558522	3.58088	0.107233	0.272453	Formation_of_the_ternary_complex,_and_subsequently,_the_43S_complex	Rps2;Rps18;
R-MMU-72706	109	3	1.1937	2.51319	0.117077	0.272453	GTP_hydrolysis_and_joining_of_the_60S_ribosomal_subunit	Rpl29;Rps2;Rps18;
R-MMU-388841	57	2	0.62423	3.20395	0.128819	0.272453	Costimulation_by_the_CD28_family	H2-Eb2;Pdcd1;
R-MMU-5576891	113	3	1.23751	2.42422	0.126687	0.272453	Cardiac_conduction	Scn3a;Fxyd6;Slc8a2;
R-MMU-72662	59	2	0.646133	3.09534	0.136226	0.272453	Activation_of_the_mRNA_upon_binding_of_the_cap-binding_complex_and_eIFs,_and_subsequent_binding_to_43S	Rps2;Rps18;
R-MMU-5578775	51	2	0.558522	3.58088	0.107233	0.272453	Ion_homeostasis	Fxyd6;Slc8a2;
R-MMU-72702	58	2	0.635181	3.14871	0.132511	0.272453	Ribosomal_scanning_and_start_codon_recognition	Rps2;Rps18;
R-MMU-381426	119	3	1.30322	2.302	0.141614	0.278427	Regulation_of_Insulin-like_Growth_Factor_(IGF)_transport_and_uptake_by_Insulin-like_Growth_Factor_Binding_Proteins_(IGFBPs)	C4b;Fam20c;Spp1;
R-MMU-372790	1024	16	4.90623	3.26116	0.147593	0.280668	Signaling_by_GPCR	Cxcl9;Ptgfr;Cxcl2;Ccr8;Ccl3;Ccl21b;Gpr15;Npy1r;Rgs13;Olfr101;Gpr176;Olfr1258;Ccl21a;Rasgrf2;Avpr1a;F2rl1;
R-MMU-2142753	62	2	0.622405	3.21334	0.14751	0.280668	Arachidonic_acid_metabolism	Aloxe3;Ptgs2;
R-MMU-556833	594	10	6.50513	1.53725	0.151617	0.28367	Metabolism_of_lipids	Hsd17b14;Acsf2;Acer2;Agmo;Aloxe3;Fabp5;Cyp2r1;Mtmr7;Ptgs2;Gpat3;
R-MMU-416476	198	4	2.03285	1.96768	0.171678	0.316105	G_alpha_(q)_signalling_events	Ptgfr;F2rl1;Avpr1a;Rgs13;
R-MMU-418346	71	2	0.664157	3.01134	0.182374	0.325468	Platelet_homeostasis	P2rx3;Slc8a2;
R-MMU-3214858	71	2	0.77755	2.57218	0.182374	0.325468	RMTs_methylate_histone_arginines	Rps2;Ccnd1;
R-MMU-1474228	137	3	0.703285	4.2657	0.18952	0.333096	Degradation_of_the_extracellular_matrix	A2m;Spp1;Cd44;
R-MMU-388396	993	15	3.1718	4.72918	0.193036	0.334212	GPCR_downstream_signalling	Ccl21b;Avpr1a;F2rl1;Rasgrf2;Ccr8;Ccl21a;Olfr1258;Gpr176;Olfr101;Rgs13;Cxcl2;Npy1r;Ptgfr;Cxcl9;Gpr15;
R-MMU-449147	258	5	2.20739	2.26512	0.208394	0.355496	Signaling_by_Interleukins	Dusp7;Il21;Il1b;Il1r2;Il12b;
R-MMU-5653656	570	3	6.2423	0.480592	0.214295	0.360264	Vesicle-mediated_transport	Rab6b;Hspa8;Copz2;
R-MMU-5607764	90	2	0.985626	2.02917	0.258869	0.428983	CLEC7A_(Dectin-1)_signaling	Pycard;Il1b;
R-MMU-9020702	94	2	0.332421	6.01647	0.275157	0.449552	Interleukin-1_signaling	Il1b;Il1r2;
R-MMU-15869	95	2	0.76945	2.59926	0.279228	0.449867	Metabolism_of_nucleotides	Ak7;Gsr;
R-MMU-199991	537	3	4.65571	0.644369	0.28497	0.45283	Membrane_Trafficking	Copz2;Hspa8;Rab6b;
R-MMU-425407	224	4	2.09537	1.90897	0.312439	0.48977	SLC-mediated_transmembrane_transport	Slc6a19;Slc7a2;Slc26a11;Slc8a2;
R-MMU-446652	106	2	1.11248	1.79778	0.323829	0.500855	Interleukin-1_family_signaling	Il1b;Il1r2;
R-MMU-5621481	108	2	0.862423	2.31905	0.331878	0.506551	C-type_lectin_receptors_(CLRs)	Pycard;Il1b;
R-MMU-114608	115	2	1.25941	1.58804	0.359828	0.542079	Platelet_degranulation_	Lgals3bp;A2m;
R-MMU-8957322	117	2	1.28131	1.5609	0.36774	0.546896	Metabolism_of_steroids	Cyp2r1;Hsd17b14;
R-MMU-76005	120	2	0.574949	3.47857	0.379538	0.550331	Response_to_elevated_platelet_cytosolic_Ca2+	A2m;Lgals3bp;
R-MMU-597592	1242	10	13.6016	0.735205	0.376032	0.550331	Post-translational_protein_modification	Rps2;Izumo1r;Lypd6b;Hspa8;C4b;Copz2;Vnn3;Spp1;Rab6b;Fam20c;
R-MMU-8856688	124	2	1.15994	1.72423	0.395128	0.565862	Golgi-to-ER_retrograde_transport	Copz2;Rab6b;
R-MMU-72312	172	3	0.824093	3.64037	0.438995	0.568349	rRNA_processing	Rps2;Rps18;Rpl29;
R-MMU-983712	171	3	1.05339	2.84795	0.437666	0.568349	Ion_channel_transport	Fxyd6;Atp6v0d2;Trpv3;
R-MMU-194315	366	2	3.13142	0.638688	0.44096	0.568349	Signaling_by_Rho_GTPases	A2m;Rasgrf2;
R-MMU-8978868	172	3	1.60894	1.86458	0.438995	0.568349	Fatty_acid_metabolism	Aloxe3;Acsf2;Ptgs2;
R-MMU-381753	360	2	3.36756	0.593903	0.440468	0.568349	Olfactory_Signaling_Pathway	Olfr1258;Olfr101;
R-MMU-382551	651	9	6.16393	1.46011	0.432382	0.568349	Transport_of_small_molecules	Slc7a2;Atp6v0d2;A2m;Trpv3;Cyb5r4;Fxyd6;Slc8a2;Slc6a19;Slc26a11;
R-MMU-8868773	172	3	1.72667	1.73745	0.438995	0.568349	rRNA_processing_in_the_nucleus_and_cytosol	Rps18;Rps2;Rpl29;
R-MMU-397014	166	3	1.81793	1.65023	0.431354	0.568349	Muscle_contraction	Slc8a2;Scn3a;Fxyd6;
R-MMU-6791226	172	3	1.88364	1.59266	0.438995	0.568349	Major_pathway_of_rRNA_processing_in_the_nucleolus_and_cytosol	Rpl29;Rps2;Rps18;
R-MMU-112315	199	3	2.04312	1.46834	0.481493	0.613772	Transmission_across_Chemical_Synapses	Hspa8;Tomt;Gad1;
R-MMU-8953854	546	4	5.60575	0.713553	0.52552	0.662613	Metabolism_of_RNA	Rps2;Rpl29;Hspa8;Rps18;
R-MMU-1474244	270	4	2.86448	1.39642	0.542207	0.676301	Extracellular_matrix_organization	A2m;Itgb8;Spp1;Cd44;
R-MMU-2262752	418	3	3.57632	0.838852	0.62971	0.769167	Cellular_responses_to_stress	Gsr;Hspa8;Atp6v0d2;
R-MMU-8953897	420	3	3.83299	0.782679	0.629921	0.769167	Cellular_responses_to_external_stimuli	Hspa8;Atp6v0d2;Gsr;
R-MMU-194840	139	2	1.52225	1.31385	0.665676	0.804358	Rho_GTPase_cycle	Rasgrf2;A2m;
R-MMU-1430728	1750	17	12.1777	1.39599	0.699949	0.828511	Metabolism	Cyp2r1;Gpat3;Gnpda1;Mtmr7;Hsd17b14;Aloxe3;Plcd3;Ak7;Cd44;Fabp5;Ptgs2;D2hgdh;Acsf2;Acer2;Agmo;Mgst2;Gsr;
R-MMU-1280218	666	8	5.2423	1.52605	0.69955	0.828511	Adaptive_Immune_System	Siglecf;H2-Q7;H2-Q6;H2-Eb2;Clec2g;Klrd1;Pdcd1;H2-K1;
R-MMU-72766	221	3	1.94125	1.5454	0.736035	0.845347	Translation	Rps18;Rps2;Rpl29;
R-MMU-6811442	178	2	1.66507	1.20115	0.72228	0.845347	Intra-Golgi_and_retrograde_Golgi-to-ER_traffic	Copz2;Rab6b;
R-MMU-162582	2353	24	23.6213	1.01603	0.729669	0.845347	Signal_Transduction	Ccr8;Ccl3;Cxcl2;Atp6v0d2;Ptgfr;Rasgrf2;Ccnd1;Avpr1a;Fabp5;Gpr176;Npy1r;Ccl21b;Cilp;Cxcl9;Spp1;Ccl21a;F2rl1;Rgs13;Olfr101;Dusp7;Olfr1258;A2m;Gpr15;Gpnmb;
R-MMU-5683057	285	2	3.12115	0.640789	0.77174	0.877665	MAPK_family_signaling_cascades	Rasgrf2;Dusp7;
R-MMU-112316	323	4	2.76352	1.44743	0.781387	0.880009	Neuronal_System	Hspa8;Gad1;Kcnh7;Tomt;
R-MMU-392499	1584	16	17.347	0.922348	0.790912	0.882171	Metabolism_of_proteins	Creb3l3;Dmbt1;Copz2;Hspa8;C4b;Lypd6b;Pcsk1;Izumo1r;Rps2;Fam20c;Rps18;Rab6b;Spp1;Rpl29;Vnn3;Pla2g7;
R-MMU-418555	477	4	5.06058	0.790424	0.81977	0.905651	G_alpha_(s)_signalling_events	Olfr1258;Gpr176;Olfr101;Gpr15;
R-MMU-71387	264	2	0.271047	7.37879	1	1	Metabolism_of_carbohydrates	Cd44;Gnpda1;
R-MMU-1483257	186	2	1.46407	1.36606	1	1	Phospholipid_metabolism	Mtmr7;Gpat3;
R-MMU-4839726	202	2	1.63609	1.22242	1	1	Chromatin_organization	Ccnd1;Rps2;
R-MMU-109582	504	5	4.25462	1.17519	1	1	Hemostasis	Lgals3bp;Slc8a2;P2rx3;A2m;Cd44;
R-MMU-9006934	399	4	3.50479	1.14129	1	1	Signaling_by_Receptor_Tyrosine_Kinases	Cilp;Atp6v0d2;Dusp7;Spp1;
R-MMU-983169	340	3	3.41319	0.878944	1	1	Class_I_MHC_mediated_antigen_processing_&_presentation	H2-Q6;H2-K1;H2-Q7;
R-MMU-5684996	262	2	2.7796	0.719527	1	1	MAPK1/MAPK3_signaling	Dusp7;Rasgrf2;
R-MMU-3247509	202	2	2.14305	0.933248	1	1	Chromatin_modifying_enzymes	Ccnd1;Rps2;
R-MMU-211859	209	2	2.21732	0.901991	1	1	Biological_oxidations	Mgst2;Cyp2r1;
R-MMU-5673001	256	2	2.80356	0.713379	1	1	RAF/MAP_kinase_cascade	Dusp7;Rasgrf2;
R-MMU-76002	241	2	2.63929	0.75778	1	1	Platelet_activation,_signaling_and_aggregation	A2m;Lgals3bp;
Table S2f: Results of 444 DEGs (up-regulated in Wt mice Vs ADM mice comparison) according to biological function in panther enrichment analysis for biological function
Sr. No.	Biological Function	No. of Genes
1	developmental process (GO:0032502)	7	2.8%	1.2%
2	multicellular organismal process (GO:0032501)	11	4.5%	1.9%
3	cellular process (GO:0009987)	120	48.8%	20.8%
4	reproduction (GO:0000003)	4	1.6%	0.7%
5	localization (GO:0051179)	45	18.3%	7.8%
6	reproductive process (GO:0022414)	4	1.6%	0.7%
7	multi-organism process (GO:0051704)	3	1.2%	0.5%
8	biological adhesion (GO:0022610)	9	3.7%	1.6%
9	immune system process (GO:0002376)	57	23.2%	9.9%
10	biological regulation (GO:0065007)	78	31.7%	13.5%
11	growth (GO:0040007)	1	0.4%	0.2%
12	signaling (GO:0023052)	43	17.5%	7.5%
13	metabolic process (GO:0008152)	73	29.7%	12.7%
14	interspecies interaction between organisms (GO:0044419)	31	12.6%	5.4%
15	pigmentation (GO:0043473)	1	0.4%	0.2%
16	response to stimulus (GO:0050896)	81	32.9%	14.0%
17	biological phase (GO:0044848)	1	0.4%	0.2%
18	locomotion (GO:0040011)	8	3.3%	1.4%
Table S3a: Results of 904 DEGs (down-regulated in Wt mice Vs ADM mice comparison) according to in panther enrichment analysis for molecular function
Sr. No.	Molecular Function	No. of Genes
1	translation regulator activity (GO:0045182)	1	0.002	0.002
2	molecular transducer activity (GO:0060089)	12	2.3%	2.9%
3	molecular adaptor activity (GO:0060090)	4	0.8%	1.0%
4	binding (GO:0005488)	162	31.0%	39.8%
5	structural molecule activity (GO:0005198)	4	0.8%	1.0%
6	molecular function regulator (GO:0098772)	67	12.8%	16.5%
7	catalytic activity (GO:0003824)	120	23.0%	29.5%
8	transporter activity (GO:0005215)	37	7.1%	9.1%
Table S3b: Results of 904 DEGs (down-regulated in Wt mice Vs ADM mice comparison)in panther enrichment analysis for cellular components
Sr. No.	Cellular Component	No. of Genes
1	cellular anatomical entity (GO:0110165)	302	57.9%	54.5%
2	protein-containing complex (GO:0032991)	51	9.8%	9.2%
3	intracellular (GO:0005622)	201	38.5%	36.3%
Table S3c: Results of 904 DEGs (down-regulated in Wt mice Vs ADM mice comparison) in panther enrichment analysis for protein class
Sr. No.	Protein Class	No. of Genes
1	extracellular matrix protein (PC00102)	8	1.5%	2.4%
2	cytoskeletal protein (PC00085)	21	4.0%	6.3%
3	transporter (PC00227)	38	7.3%	11.4%
4	scaffold/adaptor protein (PC00226)	8	1.5%	2.4%
5	cell adhesion molecule (PC00069)	5	1.0%	1.5%
6	nucleic acid metabolism protein (PC00171)	9	1.7%	2.7%
7	intercellular signal molecule (PC00207)	12	2.3%	3.6%
8	protein-binding activity modulator (PC00095)	15	2.9%	4.5%
9	viral or transposable element protein (PC00237)	1	0.2%	0.3%
10	calcium-binding protein (PC00060)	2	0.4%	0.6%
11	gene-specific transcriptional regulator (PC00264)	28	5.4%	8.4%
12	defense/immunity protein (PC00090)	19	3.6%	5.7%
13	translational protein (PC00263)	3	0.6%	0.9%
14	metabolite interconversion enzyme (PC00262)	55	10.5%	16.5%
15	protein modifying enzyme (PC00260)	39	0.075	11.7%
16	chromatin/chromatin-binding	or -regulatory protein (PC00077)	28	5.4%
17	transfer/carrier protein (PC00219)	3	0.6%	0.9%
18	membrane traffic protein (PC00150)	10	1.9%	3.0%
19	chaperone (PC00072)	7	1.3%	2.1%
20	cell junction protein (PC00070)	1	0.2%	0.3%
21	structural protein (PC00211)	1	0.2%	0.3%
22	transmembrane signal receptor (PC00197)	21	0.04	0.063
Table S3d: Results of 904 DEGs (down-regulated in Wt mice Vs ADM mice comparison) in panther enrichment analysis for pathways
Sr. No.	Pathways	No. of Genes
1	SCW signaling pathway (P06216)	1	0.002	0.006
2	DPP signaling pathway (P06213)	1	0.002	0.006
3	DPP-SCW signaling pathway (P06212)	1	0.002	0.006
4	BMP/activin signaling pathway-drosophila (P06211)	1	0.002	0.006
5	Axon guidance mediated by Slit/Robo (P00008)	1	0.002	0.006
6	Apoptosis signaling pathway (P00006)	2	0.004	0.012
7	Gonadotropin-releasing hormone receptor pathway (P06664)	2	0.004	0.012
8	Pyridoxal-5-phosphate biosynthesis (P02759)	1	0.002	0.006
9	Angiogenesis (P00005)	6	0.011	0.037
10	Alzheimer disease-presenilin pathway (P00004)	1	0.002	0.006
11	Alzheimer disease-amyloid secretase pathway (P00003)	1	0.002	0.006
12	Alpha adrenergic receptor signaling pathway (P00002)	1	0.002	0.006
13	CCKR signaling map (P06959)	3	0.006	0.019
14	Ubiquitin proteasome pathway (P00060)	2	0.004	0.012
15	p53 pathway (P00059)	6	0.011	0.037
16	Wnt signaling pathway (P00057)	4	0.008	0.025
17	Heme biosynthesis (P02746)	6	0.011	0.037
18	VEGF signaling pathway (P00056)	2	0.004	0.012
19	Transcription regulation by bZIP transcription factor (P00055)	1	0.002	0.006
20	Formyltetrahydroformate biosynthesis (P02743)	1	0.002	0.006
21	Tetrahydrofolate biosynthesis (P02742)	1	0.002	0.006
22	TGF-beta signaling pathway (P00052)	1	0.002	0.006
23	Plasminogen activating cascade (P00050)	2	0.004	0.012
24	De novo pyrimidine deoxyribonucleotide biosynthesis (P02739)	2	0.004	0.012
25	Parkinson disease (P00049)	2	0.004	0.012
26	De novo purine biosynthesis (P02738)	1	0.002	0.006
27	PI3 kinase pathway (P00048)	1	0.002	0.006
28	PDGF signaling pathway (P00047)	2	0.004	0.012
29	Oxidative stress response (P00046)	1	0.002	0.006
30	Notch signaling pathway (P00045)	1	0.002	0.006
31	Nicotinic acetylcholine receptor signaling pathway (P00044)	5	0.01	0.031
32	Muscarinic acetylcholine receptor 2 and 4 signaling pathway (P00043)	3	0.006	0.019
33	Muscarinic acetylcholine receptor 1 and 3 signaling pathway (P00042)	3	0.006	0.019
34	Metabotropic glutamate receptor group I pathway (P00041)	1	0.002	0.006
35	Asparagine and aspartate biosynthesis (P02730)	1	0.002	0.006
36	Metabotropic glutamate receptor group II pathway (P00040)	2	0.004	0.012
37	Synaptic vesicle trafficking (P05734)	1	0.002	0.006
38	GABA-B receptor II signaling (P05731)	4	0.008	0.025
39	Endogenous cannabinoid signaling (P05730)	2	0.004	0.012
40	Ascorbate degradation (P02729)	1	0.002	0.006
41	Metabotropic glutamate receptor group III pathway (P00039)	3	0.006	0.019
42	Ionotropic glutamate receptor pathway (P00037)	1	0.002	0.006
43	Integrin signalling pathway (P00034)	5	0.01	0.031
44	Vitamin B6 metabolism (P02787)	1	0.002	0.006
45	p53 pathway feedback loops 2 (P04398)	1	0.002	0.006
46	Inflammation mediated by chemokine and cytokine signaling pathway (P00031)	7	0.013	0.043
47	Hypoxia response via HIF activation (P00030)	1	0.002	0.006
48	Vasopressin synthesis (P04395)	1	0.002	0.006
49	Thyrotropin-releasing hormone receptor signaling pathway (P04394)	2	0.004	0.012
50	Oxytocin receptor mediated signaling pathway (P04391)	1	0.002	0.006
51	Huntington disease (P00029)	2	0.004	0.012
52	Heterotrimeric G-protein signaling pathway-rod outer segment phototransduction (P00028)	1	0.002	0.006
53	Heterotrimeric G-protein signaling pathway-Gq alpha and Go alpha mediated pathway (P00027)	5	0.01	0.031
54	p38 MAPK pathway (P05918)	1	0.002	0.006
55	Heterotrimeric G-protein signaling pathway-Gi alpha and Gs alpha mediated pathway (P00026)	6	0.011	0.037
56	Hedgehog signaling pathway (P00025)	1	0.002	0.006
57	Glycolysis (P00024)	2	0.004	0.012
58	Nicotine pharmacodynamics pathway (P06587)	2	0.004	0.012
59	Enkephalin release (P05913)	1	0.002	0.006
60	FGF signaling pathway (P00021)	2	0.004	0.012
61	Dopamine receptor mediated signaling pathway (P05912)	2	0.004	0.012
62	FAS signaling pathway (P00020)	1	0.002	0.006
63	Histamine H2 receptor mediated signaling pathway (P04386)	1	0.002	0.006
64	Histamine H1 receptor mediated signaling pathway (P04385)	1	0.002	0.006
65	Pyridoxal phosphate salvage pathway (P02770)	1	0.002	0.006
66	Endothelin signaling pathway (P00019)	3	0.006	0.019
67	EGF receptor signaling pathway (P00018)	2	0.004	0.012
68	DNA replication (P00017)	2	0.004	0.012
69	Cytoskeletal regulation by Rho GTPase (P00016)	4	0.008	0.025
70	Cell cycle (P00013)	1	0.002	0.006
71	Cadherin signaling pathway (P00012)	2	0.004	0.012
72	Blood coagulation (P00011)	3	0.006	0.019
73	Beta2 adrenergic receptor signaling pathway (P04378)	1	0.002	0.006
74	Beta1 adrenergic receptor signaling pathway (P04377)	1	0.002	0.006
75	5HT4 type receptor mediated signaling pathway (P04376)	1	0.002	0.006
76	Pentose phosphate pathway (P02762)	1	0.002	0.006
77	5HT3 type receptor mediated signaling pathway (P04375)	1	0.002	0.006
78	5HT2 type receptor mediated signaling pathway (P04374)	3	0.006	0.019
79	5HT1 type receptor mediated signaling pathway (P04373)	2	0.004	0.012
80	5-Hydroxytryptamine degredation (P04372)	1	0.002	0.006
Table S3e: Results of 904 DEGs (down-regulated in Wt mice Vs ADM mice comparison) in Reactome pathway analysis
TermID	TermGeneNum	ObservedGeneNum	ExpectedGeneNum	RichFactor	rawP	adjP	TermName	GeneList
R-MMU-2299718	77	29	2.46829	11.749	6.22941e-24	2.08062e-21	Condensation_of_Prophase_Chromosomes	Ccnb1;H2bc7;H4c1;H3c8;H2ac13;H2ax;H3c3;H3c11;H4c6;H3c10;H2ac4;H3c4;H2ac15;H2bc11;H2ac18;H4c11;H3c1;H2bc13;H4c12;Cdk1;H4f16;H2bc12;H2bc9;H2bu2;H2ac10;H2ac8;H3c15;H3c7;H2ac7;
R-MMU-8936459	83	28	2.56594	10.9122	1.32206e-21	2.20784e-19	RUNX1_regulates_genes_involved_in_megakaryocyte_differentiation_and_platelet_function	H2bu2;H2bc9;H2ac7;H3c7;H3c15;H2ac10;H2ac8;H3c1;H4c11;H2bc12;H4f16;H4c12;Gata1;H2bc13;H4c6;H3c11;H2ac15;H2bc11;H2ac18;H3c4;H2ac4;H3c10;H2bc7;H3c3;H2ax;H3c8;H2ac13;H4c1;
R-MMU-212300	79	27	2.37919	11.3484	4.84587e-21	5.39507e-19	PRC2_methylates_histones_and_DNA	H2bc13;H4c12;H4f16;H2bc12;H4c11;H3c1;H2ac10;H2ac8;H3c15;H3c7;H2ac7;H2bc9;H2bu2;H4c1;H2ac13;H3c8;H2ax;H3c3;H2bc7;H2ac4;H3c10;H3c4;H2bc11;H2ac15;H2ac18;H3c11;H4c6;
R-MMU-3214815	89	28	2.85296	9.81438	1.16232e-20	9.70541e-19	HDACs_deacetylate_histones	H2bc7;H3c3;H4c1;H3c8;H2ac13;H3c11;H4c6;H2ac18;H2bc11;H2ac15;H2aw;H3c4;H3c10;H2ac4;H3c1;H4c11;H4f16;H2bc12;H4c12;H2bc13;H2bu2;H2bc9;H2ac7;H3c7;H3c15;H2ac8;H2ac10;H2bc14;
R-MMU-110330	63	24	1.32238	18.1491	4.05557e-20	2.70912e-18	Recognition_and_association_of_DNA_glycosylase_with_site_containing_an_affected_purine	H2bc9;H3c11;H2bu2;H4c6;H2ac10;H2ac8;H3c10;H2ac4;Neil3;H2ac18;H2ac15;H2bc11;H2ac7;H4c11;H2bc7;H3c1;H2bc13;H4c1;H3c8;H2ac13;H4c12;H2ax;H4f16;H2bc12;
R-MMU-110331	65	24	1.79443	13.3747	9.70248e-20	4.62947e-18	Cleavage_of_the_damaged_purine	H4c6;H3c11;H2bc11;H2ac15;H2ac18;H3c10;H2ac4;H2bc7;H2ax;H2ac13;H3c8;H4c1;H2bc9;H2bu2;H2ac7;H2ac10;H2ac8;Neil3;H3c1;H4c11;H2bc12;H4f16;H2bc13;H4c12;
R-MMU-73927	65	24	2.04654	11.7271	9.70248e-20	4.62947e-18	Depurination	H2ac10;H2ac8;Neil3;H2ac7;H2bc9;H2bu2;H2bc13;H4c12;H2bc12;H4f16;H4c11;H3c1;H2ac4;H3c10;H2ac18;H2ac15;H2bc11;H4c6;H3c11;H3c8;H2ac13;H4c1;H2ax;H2bc7;
R-MMU-73929	72	24	2.22587	10.7823	1.58154e-18	6.60294e-17	Base-Excision_Repair,_AP_Site_Formation	H4f16;H2bc12;H4c12;H2bc13;H3c1;H4c11;H2ac7;Neil3;H2ac8;H2ac10;H2bu2;H2bc9;H2ax;H4c1;H3c8;H2ac13;H2bc7;H2ac18;H2bc11;H2ac15;H3c10;H2ac4;H3c11;H4c6;
R-MMU-9670095	65	23	2.03171	11.3205	1.78579e-18	6.62726e-17	Inhibition_of_DNA_recombination_at_telomere	H4f16;H2bc12;H4c12;H2bc13;H3c1;H4c11;H2ac7;H2ac10;H2ac8;H2bu2;H2bc9;H2ax;H4c1;H3c8;H2ac13;H2bc7;H2bc11;H2ac15;H2ac18;H3c10;H2ac4;H3c11;H4c6;
R-MMU-606279	78	24	1.53046	15.6816	1.31942e-17	4.00624e-16	Deposition_of_new_CENPA-containing_nucleosomes_at_the_centromere	H4c1;Cenps;Cenpp;H2ac13;H2ax;Cenph;H2bc7;Oip5;H2ac4;H2bc11;H2ac15;H2ac18;H4c6;H2bc13;H4c12;H4f16;H2bc12;H4c11;H2ac8;H2ac10;H2ac7;H2bc9;Cenpk;H2bu2;
R-MMU-774815	78	24	2.54483	9.43088	1.31942e-17	4.00624e-16	Nucleosome_assembly	H2ac8;H2ac10;H2ac7;Cenpk;H2bu2;H2bc9;H4c12;H2bc13;H2bc12;H4f16;H4c11;Oip5;H2ac4;H2ac18;H2bc11;H2ac15;H4c6;H2ac13;Cenpp;Cenps;H4c1;H2ax;H2bc7;Cenph;
R-MMU-68875	135	30	3.55749	8.4329	2.50535e-17	6.97323e-16	Mitotic_Prophase	H2ac10;H3c7;H2bc9;H2bu2;Cdk1;H2bc13;H4c11;H2ac15;H4c6;Lmna;H2ax;Ccnb1;H2ac7;H2ac8;H3c15;H2bc12;H4f16;H4c12;H3c1;H3c4;H2ac18;H2bc11;H2ac4;H3c10;H3c11;H3c3;H2ac13;H3c8;H4c1;H2bc7;
R-MMU-2559586	89	25	2.85296	8.76284	3.14135e-17	8.07086e-16	DNA_Damage/Telomere_Stress_Induced_Senescence	H2bc13;H4c12;Ccna2;H2bc12;H4f16;H4c11;H3c1;H2ac8;H2ac10;H2ac7;H2bc9;H2bu2;H3c8;H2ac13;H4c1;H2ax;H2bc7;H1f5;H3c10;H2ac4;H2ac15;H2bc11;H2ac18;H4c6;H3c11;
R-MMU-212165	109	27	2.88478	9.35946	5.53756e-17	1.3211e-15	Epigenetic_regulation_of_gene_expression	H2bc9;H2bu2;H2ac7;H2ac8;H2ac10;H3c15;H3c7;H3c1;H4c11;H2bc12;H4f16;H2bc13;H4c12;H4c6;H3c11;H3c4;H2bc11;H2ac15;H2ac18;H3c10;H2ac4;H2bc7;H2ax;H3c3;H3c8;H2ac13;H4c1;
R-MMU-73886	130	29	3.12914	9.26774	7.85319e-17	1.74864e-15	Chromosome_Maintenance	H2bu2;H2bc9;H2ac10;H4c11;Ccna2;H2bc13;H4c6;H2ac15;Cenph;H2ax;Cenpk;H2ac7;H2ac8;H3c1;H4f16;H2bc12;H4c12;H3c11;H2bc11;H2ac18;Oip5;H2ac4;H3c10;H2bc7;H4c1;Cenps;Cenpp;H2ac13;H3c8;
R-MMU-73884	93	24	2.98118	8.05051	1.17155e-15	2.4456e-14	Base_Excision_Repair	H2bc7;H3c8;H2ac13;H4c1;H2ax;H4c6;H3c11;H3c10;H2ac4;H2ac18;H2bc11;H2ac15;H4c11;H3c1;H4c12;H2bc13;H2bc12;H4f16;H2bu2;H2bc9;Neil3;H2ac10;H2ac8;H2ac7;
R-MMU-3214858	71	21	2.15446	9.74722	3.70369e-15	7.27666e-14	RMTs_methylate_histone_arginines	H2ac4;H3c10;H2ac18;H2ac15;H2aw;H3c4;H3c11;H4c6;H4c1;H3c8;H2ac13;H3c3;H3c7;H2ac10;H3c15;H2ac8;H2ac7;H4c12;H4f16;H4c11;H3c1;
R-MMU-157579	104	24	3.15583	7.60497	1.8064e-14	3.35187e-13	Telomere_Maintenance	H2bc11;H2ac15;H2ac18;H2ac4;H3c10;H4c6;H3c11;H2ax;H2ac13;H3c8;H4c1;H2bc7;H2ac7;H2ac8;H2ac10;H2bc9;H2bu2;H2bc12;H4f16;H2bc13;Ccna2;H4c12;H3c1;H4c11;
R-MMU-3214847	72	20	2.25873	8.85454	6.53394e-14	1.1486e-12	HATs_acetylate_histones	H3c10;H2bc11;H3c4;H3c11;H4c6;H4c1;H3c8;H3c3;H2bc7;H3c7;H3c15;H2bc14;H2bu2;H2bc9;H4c12;H2bc13;H4f16;H2bc12;H4c11;H3c1;
R-MMU-68886	399	44	12.4716	3.52802	5.78679e-13	9.66394e-12	M_Phase	H3c3;H2ac13;Cenpp;H2bc7;H3c4;H3c11;H2bc12;Nuf2;H3c1;Ube2c;H3c15;Ccnb1;Ninl;Lmna;Cdk1;H4c11;H2ac10;H3c7;Cdc20;Cenpf;H2bu2;Cenps;H4c1;H3c8;Prkar2b;H2ac18;H2bc11;H2ac4;H3c10;Spc25;H4f16;Cdca8;H4c12;H2ac7;H2ac8;Cenpk;H2ax;Cenph;H2ac15;Kntc1;H4c6;H2bc13;Birc5;H2bc9;
R-MMU-69278	515	50	15.6274	3.1995	1.723e-12	2.74039e-11	Cell_Cycle,_Mitotic	H2bu2;H3c7;Cdc20;H2ac10;Cdk1;Lmna;E2f2;H3c1;Nuf2;Ube2c;Cdc6;H3c11;H3c4;H2bc7;H3c3;Cenpp;H2bc9;Birc5;Ccna2;H4c6;H2ac15;Kntc1;Cenph;H2ac7;H2ac8;Cdca8;H4f16;H3c10;H2ac4;Prkar2b;Cenps;H3c8;Cenpf;Esco2;H4c11;Ninl;Ccnb1;Gtse1;H3c15;H2bc12;H2ac13;H2bc13;H2ax;Hmmr;Cenpk;H4c12;Spc25;H2ac18;H2bc11;H4c1;
R-MMU-2559583	153	26	2.91478	8.92004	2.93715e-12	4.45913e-11	Cellular_Senescence	H3c11;H2ac4;H3c10;H2ac18;H2bc11;H2bc7;H3c8;H2ac13;H4c1;H2ac8;H2ac7;Ube2c;H3c1;H4c12;H2bc12;H4f16;H4c6;H2ac15;H1f5;H2ax;H2bc9;H2bu2;H2ac10;H4c11;H2bc13;Ccna2;
R-MMU-8878171	204	29	5.81793	4.98459	1.56216e-11	2.26853e-10	Transcriptional_regulation_by_RUNX1	H2ac7;H3c15;H2ac8;H4f16;H2bc12;H4c12;H3c1;H3c4;H2ac18;H2bc11;H3c10;H2ac4;H3c11;H3c3;H4c1;H2ac13;H3c8;H2bc7;H2ac10;H3c7;H2bc9;H2bu2;H2bc13;Gata1;H4c11;H2ac15;Tal1;H4c6;H2ax;
R-MMU-69620	281	34	6.69963	5.0749	2.51982e-11	3.50674e-10	Cell_Cycle_Checkpoints	Gtse1;Ube2c;Clspn;H3c1;Nuf2;H2bc12;H3c11;Cdc6;H2bc7;Cenpp;H2bu2;Cenpf;Cdc20;H4c11;Cdk1;Ccnb1;Cenpk;H4c12;Cdca8;H4f16;Spc25;H3c10;H2bc11;H4c1;Cenps;H3c8;H2bc9;Birc5;Ccna2;H2bc13;H4c6;Kntc1;Cenph;H2ax;
R-MMU-1640170	597	52	19.4778	2.66971	3.75129e-11	5.01172e-10	Cell_Cycle	H2ac13;Clspn;H2bc12;Gtse1;H3c15;Ccnb1;Ninl;H4c11;Cenpf;Esco2;H4c1;Spc25;H2bc11;H2ac18;H4c12;Cenpk;H2ax;Hmmr;H2bc13;H2bc7;H3c3;Cenpp;Cdc6;H3c11;H3c4;Oip5;Nuf2;H3c1;Ube2c;Lmna;E2f2;Cdk1;H2bu2;H2ac10;Cdc20;H3c7;Prkar2b;H3c8;Cenps;H3c10;H2ac4;H4f16;Cdca8;H2ac7;H2ac8;Cenph;H4c6;H2ac15;Kntc1;Ccna2;H2bc9;Birc5;
R-MMU-9018519	90	19	2.68994	7.06336	5.61853e-11	7.21765e-10	Estrogen-dependent_gene_expression	H3c10;H3c4;H2bc11;H3c11;H4c6;H4c1;H3c8;H3c3;H2bc7;H3c15;H3c7;H2bc9;H2bu2;H2bc13;H4c12;H4f16;H2bc12;H4c11;H3c1;
R-MMU-5693571	61	16	1.57963	10.129	5.86795e-11	7.25887e-10	Nonhomologous_End-Joining_(NHEJ)	H4c12;H4c1;H2bc13;H3c8;H4f16;H2ax;H2bc12;H2bc7;H4c11;H3c1;H3c10;H2bc11;H2bu2;H3c11;H4c6;H2bc9;
R-MMU-4839726	202	28	6.36003	4.4025	6.59709e-11	7.59802e-10	Chromatin_organization	H2aw;H2ac15;H4c6;H2ac10;H3c7;H2bc9;H2bu2;H2bc13;H4c11;H3c4;H2bc11;H2ac18;H3c10;H2ac4;H3c11;H3c3;H4c1;H3c8;H2ac13;H2bc7;H2ac7;H3c15;H2ac8;H2bc14;H4f16;H2bc12;H4c12;H3c1;
R-MMU-3247509	202	28	6.47525	4.32416	6.59709e-11	7.59802e-10	Chromatin_modifying_enzymes	H3c10;H2ac4;H2ac18;H2bc11;H3c4;H3c11;H4c1;H2ac13;H3c8;H3c3;H2bc7;H3c15;H2ac8;H2bc14;H2ac7;H4c12;H4f16;H2bc12;H3c1;H2ac15;H2aw;H4c6;H3c7;H2ac10;H2bu2;H2bc9;H2bc13;H4c11;
R-MMU-5693607	87	18	2.6499	6.79272	2.60328e-10	2.89832e-09	Processing_of_DNA_double-strand_break_ends	H3c11;H4c6;H2bc11;H3c10;H2bc7;H2ax;H4c1;H3c8;H2bu2;H2bc9;H3c1;Clspn;H4c11;H4f16;H2bc12;Ccna2;H4c12;H2bc13;
R-MMU-1247673	8	7	0.247319	28.3035	2.84887e-10	3.06943e-09	Erythrocytes_take_up_oxygen_and_release_carbon_dioxide	Car2;Car1;Aqp1;Rhag;Slc4a1;Hbb-bs;Hbb-bt;
R-MMU-69473	90	18	2.88501	6.23915	4.69387e-10	4.89922e-09	G2/M_DNA_damage_checkpoint	Cdk1;H4f16;H2bc12;H2bc13;H4c12;H3c1;H4c11;H2bc9;H2bu2;H2ax;H4c1;H3c8;Ccnb1;H2bc7;H2bc11;H3c10;H3c11;H4c6;
R-MMU-3214842	45	13	1.1653	11.1559	1.03577e-09	1.04832e-08	HDMs_demethylate_histones	H3c8;H4c1;H4c12;H4f16;H3c3;H4c11;H3c1;H3c15;H3c7;H3c10;H3c4;H4c6;H3c11;
R-MMU-5693565	73	16	2.22348	7.19594	1.07107e-09	1.05217e-08	Recruitment_and_ATM-mediated_phosphorylation_of_repair_and_signaling_proteins_at_DNA_double_strand_breaks	H2bc7;H2ax;H4c1;H3c8;H3c11;H4c6;H2bc11;H3c10;H3c1;H4c11;H4f16;H2bc12;H4c12;H2bc13;H2bu2;H2bc9;
R-MMU-189451	13	8	0.034109	234.542	1.30158e-09	1.23103e-08	Heme_biosynthesis	Hmbs;Ppox;Alad;Cpox;Uros;Alas2;Abcg2;Urod;
R-MMU-5693606	74	16	1.78964	8.94034	1.32686e-09	1.23103e-08	DNA_Double_Strand_Break_Response	H2bu2;H2bc9;H4f16;H2bc12;H4c12;H2bc13;H3c1;H4c11;H2bc11;H3c10;H3c11;H4c6;H2ax;H4c1;H3c8;H2bc7;
R-MMU-1237044	12	7	0.33128	21.1302	2.51911e-08	2.21417e-07	Erythrocytes_take_up_carbon_dioxide_and_release_oxygen	Rhag;Aqp1;Car2;Car1;Hbb-bs;Slc4a1;Hbb-bt;
R-MMU-1480926	12	7	0.384668	18.1975	2.51911e-08	2.21417e-07	O2/CO2_exchange_in_erythrocytes	Slc4a1;Hbb-bs;Hbb-bt;Car1;Car2;Aqp1;Rhag;
R-MMU-8939211	159	21	5.09685	4.12019	4.22244e-08	3.61614e-07	ESR-mediated_signaling	H3c11;H3c4;H2bc11;H3c10;H2bc7;H3c3;H3c8;H4c1;H3c15;H3c1;H2bc12;H4f16;H4c12;Sphk1;H4c6;H2bc9;Hbegf;H2bu2;H3c7;H4c11;H2bc13;
R-MMU-5693567	120	18	3.84668	4.67936	5.55759e-08	4.64059e-07	HDR_through_Homologous_Recombination_(HRR)_or_Single_Strand_Annealing_(SSA)	H3c11;H4c6;H3c10;H2bc11;H2bc7;H4c1;H3c8;H2ax;H2bu2;H2bc9;H4c11;Clspn;H3c1;Ccna2;H4c12;H2bc13;H4f16;H2bc12;
R-MMU-69481	162	21	5.19302	4.04389	5.87809e-08	4.78849e-07	G2/M_Checkpoints	H4c11;Cdk1;H2bc13;H2bc9;H2bu2;Ccnb1;H2ax;H4c6;H3c1;Clspn;H4f16;H2bc12;H4c12;Gtse1;H2bc7;H4c1;H3c8;H3c11;Cdc6;H2bc11;H3c10;
R-MMU-3214841	62	13	1.20945	10.7487	7.16068e-08	5.69445e-07	PKMTs_methylate_histone_lysines	H3c11;H4c6;H3c15;H3c10;H3c7;H3c4;H4c11;H3c1;H4c1;H3c8;H4c12;H4f16;H3c3;
R-MMU-5693538	123	18	2.5397	7.08745	8.21225e-08	6.37882e-07	Homology_Directed_Repair	H3c8;H4c1;H2ax;H2bc7;H3c10;H2bc11;H4c6;H3c11;H2bc13;Ccna2;H4c12;H2bc12;H4f16;Clspn;H4c11;H3c1;H2bc9;H2bu2;
R-MMU-73894	307	28	9.84109	2.84521	7.43858e-07	5.64656e-06	DNA_Repair	Clspn;H3c1;H2bc12;Neil3;H2bc7;H2ac13;H3c11;H4c11;H2bu2;H2ac10;Ube2l6;H4c12;H4f16;H2ac8;H2ac7;H3c8;H4c1;Cenps;H3c10;H2ac4;H2bc11;H2ac18;Ccna2;H2bc13;H2bc9;H2ax;H4c6;H2ac15;
R-MMU-1266695	25	8	0.787132	10.1635	7.76638e-07	5.76438e-06	Interleukin-7_signaling	H3c11;H3c1;H3c8;H3c15;H3c7;H3c10;H3c4;H3c3;
R-MMU-9006931	208	22	6.2642	3.51202	1.04728e-06	7.60414e-06	Signaling_by_Nuclear_Receptors	Aldh1a1;Sphk1;H4c6;H2bc13;H4c11;H3c7;H2bc9;Hbegf;H2bu2;H3c3;H3c8;H4c1;H2bc7;H3c4;H2bc11;H3c10;H3c11;H2bc12;H4f16;H4c12;H3c1;H3c15;
R-MMU-189445	26	8	0.833447	9.59869	1.09031e-06	7.74813e-06	Metabolism_of_porphyrins	Ppox;Abcg2;Alas2;Hmbs;Alad;Cpox;Uros;Urod;
R-MMU-5693532	149	18	4.7763	3.76861	1.52743e-06	1.06284e-05	DNA_Double-Strand_Break_Repair	H2bc12;H4f16;H4c12;H3c1;Clspn;H2bc11;H3c10;H3c11;H3c8;H4c1;H2bc7;H2bc9;H2bu2;H2bc13;Ccna2;H4c11;H4c6;H2ax;
R-MMU-983231	120	15	3.84668	3.89947	7.58073e-06	5.16727e-05	Factors_involved_in_megakaryocyte_development_and_platelet_production	H3c7;H3c15;Sh2b2;Kif18b;Gata1;Kifc5b;H3c1;H3c10;Kif4;H3c4;H3c11;H3c8;H3c3;Prkar2b;Nfe2;
R-MMU-2262752	418	31	9.53685	3.25055	1.53021e-05	0.000102218	Cellular_responses_to_stress	H4f16;H4c12;H2ac7;H2ac8;H4c1;H3c8;Atp6v0e2;H2bc11;H2ac18;H2ac4;H3c10;Ccna2;H2bc13;H2bc9;H2ax;H4c6;H2ac15;H3c1;Ube2c;H2bc12;Prdx2;Bag2;Dnaja4;H2bc7;H2ac13;H3c11;H4c11;H2bu2;H2ac10;H1f5;Txnrd2;
R-MMU-5689901	36	8	1.154	6.93239	1.58914e-05	0.000104073	Metalloprotease_DUBs	H2ac4;H2ac10;H2ac8;H2ac15;H2ac7;H2ac18;H2aw;H2ac13;
R-MMU-8953854	546	3	7.47433	0.401374	1.75813e-05	0.000112926	Metabolism_of_RNA	Gspt2;Nxf7;Magohb;
R-MMU-8953897	420	31	13.1759	2.35278	2.60605e-05	0.00016423	Cellular_responses_to_external_stimuli	Ccna2;H2bc13;H2bc9;H2ax;H4c6;H2ac15;H4c12;H4f16;H2ac8;H2ac7;H3c8;H4c1;Atp6v0e2;H3c10;H2ac4;H2bc11;H2ac18;H4c11;H2bu2;H2ac10;H1f5;Txnrd2;Ube2c;H3c1;H2bc12;Dnaja4;Prdx2;Bag2;H2bc7;H2ac13;H3c11;
R-MMU-418555	477	2	8.43429	0.237127	2.67e-05	0.000165144	G_alpha_(s)_signalling_events	Olfr145;Olfr420;
R-MMU-382551	651	40	21.2396	1.88328	8.12805e-05	0.000493594	Transport_of_small_molecules	Abca4;Aqp4;Tfr2;Car1;Atp9a;Add2;Slc38a5;Slc22a4;Ano3;Slc14a1;Prkar2b;Slc4a1;Fxyd4;Atp6v0e2;Hbb-bs;Hbb-bt;Slc26a3;Aqp9;Rhag;Pln;Clcn2;Slc6a9;Trpv5;Abcg4;Aqp1;Dmtn;Slc43a1;Tfrc;Atp7b;Atp1b2;Abcb6;Atp2b4;Slc30a10;Steap3;Abcg2;Abcb4;Nipa1;Car2;Slc16a10;Lcn2;
R-MMU-2500257	117	13	3.56365	3.64794	0.000106936	0.000637798	Resolution_of_Sister_Chromatid_Cohesion	Cenpp;Cenps;Cenph;Ccnb1;Kntc1;Spc25;Cdk1;Cdca8;Nuf2;Cdc20;Birc5;Cenpk;Cenpf;
R-MMU-6799990	4	3	0.083048	36.1237	0.000134179	0.000786242	Metal_sequestration_by_antimicrobial_proteins	Lcn2;S100a9;S100a8;
R-MMU-141444	90	11	1.48871	7.38897	0.000154601	0.000875201	Amplification__of_signal_from_unattached__kinetochores_via_a_MAD2__inhibitory_signal	Cenpp;Cenps;Cenph;Kntc1;Spc25;Cdca8;Nuf2;Birc5;Cdc20;Cenpf;Cenpk;
R-MMU-141424	90	11	2.88501	3.81281	0.000154601	0.000875201	Amplification_of_signal_from_the_kinetochores	Birc5;Cdc20;Cenpf;Cenpk;Cdca8;Nuf2;Kntc1;Spc25;Cenps;Cenpp;Cenph;
R-MMU-69618	107	12	3.42996	3.49859	0.000179752	0.00100062	Mitotic_Spindle_Checkpoint	Cdca8;Nuf2;Ube2c;Birc5;Cdc20;Cenpf;Cenpk;Cenps;Cenpp;Cenph;Kntc1;Spc25;
R-MMU-212436	830	47	18.7474	2.50701	0.000183819	0.00100648	Generic_Transcription_Pathway	H3c15;Zfp457;H2bc12;H2ac13;H4c11;Zfp69;Gata1;Ccnb1;Cited4;Rorc;H4c12;H2ac18;H2bc11;Zfp612;Steap3;H4c1;E2f8;H2bc13;E2f7;H2ax;Prdx2;H3c1;H3c11;H3c4;H2bc7;H3c3;H2bu2;H2ac10;H3c7;Zfp600;Gm14322;Cdk1;Gadd45a;Zfp811;H2ac7;H2ac8;H4f16;H2ac4;H3c10;Pidd1;H3c8;H2bc9;Nr0b2;Ccna2;H4c6;H2ac15;Tal1;
R-MMU-176417	6	3	0.002053	1461.28	0.000638864	0.00344162	Phosphorylation_of_Emi1	Cdk1;Ccnb1;Cdc20;
R-MMU-9648025	106	11	3.28907	3.34441	0.0006512	0.00345239	EML4_and_NUDC_in_mitotic_spindle_formation	Spc25;Kntc1;Cenph;Cenpp;Cenps;Cenpf;Cenpk;Birc5;Cdc20;Nuf2;Cdca8;
R-MMU-6791312	34	6	1.08989	5.50513	0.000712004	0.00371577	TP53_Regulates_Transcription_of_Cell_Cycle_Genes	E2f8;Cdk1;Ccna2;E2f7;Gadd45a;Ccnb1;
R-MMU-445095	7	3	0.220397	13.6118	0.00109106	0.00552143	Interaction_between_L1_and_Ankyrins	Sptbn2;Spta1;Ank1;
R-MMU-6804114	7	3	0.22439	13.3696	0.00109106	0.00552143	TP53_Regulates_Transcription_of_Genes_Involved_in_G2_Cell_Cycle_Arrest	Cdk1;Gadd45a;Ccnb1;
R-MMU-5663220	131	12	3.97513	3.01877	0.00114856	0.00566569	RHO_GTPases_Activate_Formins	Diaph3;Spc25;Cenps;Cenpp;Cenpk;Cdca8;Nuf2;Kntc1;Cenph;Birc5;Cdc20;Cenpf;
R-MMU-381753	360	2	10.9651	0.182397	0.00115349	0.00566569	Olfactory_Signaling_Pathway	Olfr420;Olfr145;
R-MMU-68877	188	15	6.02647	2.48902	0.00122247	0.00591748	Mitotic_Prometaphase	Ccnb1;Cenph;Kntc1;Ninl;Cdk1;Cdc20;Birc5;Cenpf;Cenps;Cenpp;Prkar2b;Spc25;Cdca8;Nuf2;Cenpk;
R-MMU-73857	948	48	22.8186	2.10355	0.00182852	0.00872464	RNA_Polymerase_II_Transcription	Zfp811;Gadd45a;Cdk1;Gm14322;Magohb;Zfp600;H3c7;H2ac10;H2bu2;H3c3;H2bc7;H3c4;H3c11;H3c1;Prdx2;Tal1;H2ac15;H4c6;Ccna2;Nr0b2;H2bc9;H3c8;Pidd1;H2ac4;H3c10;H4f16;H2ac8;H2ac7;Ccnb1;Gata1;H4c11;Zfp69;H2ac13;H2bc12;Zfp457;H3c15;H2ax;E2f7;H2bc13;E2f8;H4c1;Zfp612;Steap3;H2ac18;H2bc11;Rorc;H4c12;Cited4;
R-MMU-176408	29	5	0.52601	9.50552	0.0022269	0.0104758	Regulation_of_APC/C_activators_between_G1/S_and_early_anaphase	Cdk1;Cdc20;Ccna2;Ube2c;Ccnb1;
R-MMU-195258	239	17	4.66222	3.64633	0.00240382	0.0111511	RHO_GTPase_Effectors	S100a8;Kntc1;Cenph;Cenpf;Cdc20;Birc5;Spc25;Diaph3;Kif14;S100a9;Cit;Cenpp;Cenps;Cenpk;Myh10;Nuf2;Cdca8;
R-MMU-6804116	10	3	0.232717	12.8912	0.00347754	0.0159109	TP53_Regulates_Transcription_of_Genes_Involved_in_G1_Cell_Cycle_Arrest	Ccna2;E2f7;E2f8;
R-MMU-432047	11	3	0.279831	10.7208	0.00466709	0.021065	Passive_transport_by_Aquaporins	Aqp4;Aqp9;Aqp1;
R-MMU-68882	219	15	6.89528	2.1754	0.00595523	0.0261975	Mitotic_Anaphase	Cenpk;Cdca8;Ube2c;Nuf2;Spc25;Cenps;Cenpp;Cdc20;Birc5;Cenpf;Cdk1;Kntc1;Lmna;Cenph;Ccnb1;
R-MMU-194315	366	22	11.7324	1.87515	0.00596112	0.0261975	Signaling_by_Rho_GTPases	Cenps;Cit;S100a9;Spc25;Arhgef16;Cdca8;Itsn1;Cenpk;Cenph;Kntc1;S100a8;Birc5;Cenpp;Kif14;Diaph3;Depdc1b;Nuf2;Myh10;Arhgap33;Cdc20;Arhgef37;Cenpf;
R-MMU-75205	12	3	0.384668	7.79893	0.006074	0.0263469	Dissolution_of_Fibrin_Clot	Plat;Serpinf2;Serpine2;
R-MMU-2555396	220	15	6.70089	2.23851	0.00615964	0.0263759	Mitotic_Metaphase_and_Anaphase	Cenpk;Cdca8;Ube2c;Nuf2;Spc25;Cenps;Cenpp;Cdc20;Birc5;Cenpf;Cdk1;Kntc1;Lmna;Ccnb1;Cenph;
R-MMU-174048	24	4	0.616016	6.49334	0.00703868	0.0297585	APC/C:Cdc20_mediated_degradation_of_Cyclin_B	Ccnb1;Ube2c;Cdc20;Cdk1;
R-MMU-936837	53	6	1.72918	3.46985	0.00724845	0.0302623	Ion_transport_by_P-type_ATPases	Atp9a;Fxyd4;Pln;Atp2b4;Atp7b;Atp1b2;
R-MMU-8948216	39	5	1.18344	4.22499	0.00828314	0.0341552	Collagen_chain_trimerization	Col14a1;Col11a1;Col12a1;Col19a1;Col6a2;
R-MMU-917937	56	6	1.79512	3.3424	0.0094536	0.0385061	Iron_uptake_and_transport	Tfrc;Lcn2;Atp6v0e2;Tfr2;Abcg2;Steap3;
R-MMU-4419969	14	3	0.421629	7.11526	0.00957602	0.0385348	Depolymerisation_of_the_Nuclear_Lamina	Cdk1;Lmna;Ccnb1;
R-MMU-2980767	5	2	0.068446	29.2201	0.00993755	0.0390487	Activation_of_NIMA_Kinases_NEK9,_NEK6,_NEK7	Ccnb1;Cdk1;
R-MMU-69478	5	2	0.082706	24.182	0.00993755	0.0390487	G2/M_DNA_replication_checkpoint	Ccnb1;Cdk1;
R-MMU-5689603	94	8	2.41273	3.31575	0.0114624	0.0445169	UCH_proteinases	H2ac7;H2ac10;H2ac8;H2ac13;H2ac15;H2ac18;H2aw;H2ac4;
R-MMU-74160	1046	48	33.0529	1.45222	0.0154399	0.0592751	Gene_expression_(Transcription)	H4f16;H3c10;H3c8;H2bc9;H2ac15;H4c6;Prdx2;H3c4;H3c11;H3c3;H2bc7;H3c7;H2bu2;Magohb;Zfp811;Cited4;H2bc11;H4c1;Steap3;H2bc13;H2ax;H4c11;Zfp69;Ccnb1;H2ac8;H2ac7;H2ac4;Pidd1;Ccna2;Nr0b2;Tal1;H3c1;H2ac10;Gadd45a;Cdk1;Gm14322;Zfp600;Rorc;H4c12;H2ac18;Zfp612;E2f7;E2f8;Zfp457;H3c15;H2bc12;H2ac13;Gata1;
R-MMU-917977	31	4	0.887634	4.50636	0.0174442	0.0662085	Transferrin_endocytosis_and_recycling	Tfrc;Steap3;Atp6v0e2;Tfr2;
R-MMU-75153	47	5	1.41547	3.5324	0.0178821	0.0671081	Apoptotic_execution_phase	H1f5;Clspn;Dsg1a;Dsg3;Lmna;
R-MMU-2467813	182	12	5.93794	2.0209	0.0181697	0.06743	Separation_of_Sister_Chromatids	Cenpk;Ube2c;Nuf2;Cdca8;Spc25;Cenps;Cenpp;Cenpf;Cdc20;Birc5;Kntc1;Cenph;
R-MMU-2995383	18	3	0.051335	58.4397	0.0195008	0.0707964	Initiation_of_Nuclear_Envelope_(NE)_Reformation	Cdk1;Ccnb1;Lmna;
R-MMU-109582	504	26	16.0986	1.61505	0.0192945	0.0707964	Hemostasis	Serpinf2;H3c8;Plat;Prkar2b;H3c10;Cd177;Rab27b;Kifc5b;Atp2b4;P2ry1;Nfe2;Serpine2;H3c3;F2r;Kif4;H3c4;H3c11;H3c1;H3c15;Kif18b;Sh2b2;Fn1;Atp1b2;Prkcg;Gata1;H3c7;
R-MMU-1474244	270	16	7.3614	2.1735	0.0214095	0.0768901	Extracellular_matrix_organization	Fn1;Col14a1;Col19a1;Icam4;Mfap2;Col12a1;Col11a1;Loxl2;Ctsg;Tnr;Spock3;Elane;Klk1;Emilin2;Tnn;Col6a2;
R-MMU-375165	34	4	1.03559	3.86253	0.0238336	0.0846854	NCAM_signaling_for_neurite_out-growth	Col6a2;Sptbn2;Spta1;Ncam1;
R-MMU-5625900	8	2	0.024641	81.1655	0.0260791	0.0903491	RHO_GTPases_activate_CIT	Kif14;Cit;
R-MMU-176412	20	3	0.581793	5.15647	0.0259727	0.0903491	Phosphorylation_of_the_APC/C	Ccnb1;Ube2c;Cdk1;
R-MMU-111465	35	4	1.05407	3.7948	0.0262391	0.0903491	Apoptotic_cleavage_of_cellular_proteins	Clspn;Lmna;Dsg1a;Dsg3;
R-MMU-8866654	53	5	1.22736	4.0738	0.0286011	0.0974772	E3_ubiquitin_ligases_ubiquitinate_target_proteins	H2bc7;H2bc12;H2bc13;H2bc9;H2bc11;
R-MMU-388396	993	21	32.3977	0.648195	0.0289258	0.0975881	GPCR_downstream_signalling	Hbegf;Grm8;Arhgef37;Rgs17;Prokr1;Prkcg;Olfr145;F2r;Cnga1;Aplnr;Tac2;Itsn1;P2ry1;Gpsm2;Rbp4;Arhgef16;Prkar2b;Htr2a;Olfr420;Abca4;Adcy8;
R-MMU-140875	21	3	0.347365	8.63645	0.029588	0.0978455	Common_Pathway_of_Fibrin_Clot_Formation	Cd177;F2r;Serpine2;
R-MMU-2168880	21	3	0.539014	5.56572	0.029588	0.0978455	Scavenging_of_heme_from_plasma	Hbb-bs;Cd163;Hbb-bt;
R-MMU-372790	1024	22	15.3028	1.43765	0.0311619	0.101076	Signaling_by_GPCR	Htr2a;Olfr420;Abca4;Cnga1;Aplnr;Gpsm2;Itsn1;Arhgef16;Arhgef37;Rgs17;Olfr145;Prkcg;Kel;F2r;Adcy8;Tac2;P2ry1;Rbp4;Prkar2b;Prokr1;Hbegf;Grm8;
R-MMU-8852135	73	6	2.29843	2.61048	0.0314218	0.101076	Protein_ubiquitination	H2bc11;H2bc7;H2bc9;Ube2c;H2bc13;H2bc12;
R-MMU-445717	37	4	1.18606	3.37251	0.0314729	0.101076	Aquaporin-mediated_transport	Aqp9;Prkar2b;Aqp1;Aqp4;
R-MMU-69273	22	3	0.456765	6.56793	0.0334546	0.106417	Cyclin_A/B1/B2_associated_events_during_G2/M_transition	Ccnb1;Ccna2;Cdk1;
R-MMU-1257604	226	2	7.24458	0.276068	0.0356859	0.111394	PIP3_activates_AKT_signaling	Il1rl1;Hbegf;
R-MMU-72203	226	2	7.37349	0.271242	0.0356859	0.111394	Processing_of_Capped_Intron-Containing_Pre-mRNA	Nxf7;Magohb;
R-MMU-198933	97	7	1.29466	5.40682	0.0388576	0.120171	Immunoregulatory_interactions_between_a_Lymphoid_and_a_non-Lymphoid_cell	Cd300ld4;Cd300e;Cd300ld5;H2-Q1;Cd300ld3;Pianp;Icam4;
R-MMU-68689	10	2	0.326261	6.13006	0.0401526	0.123037	CDC6_association_with_the_ORC:origin_complex	Cdc6;E2f2;
R-MMU-1650814	59	5	1.79033	2.79279	0.0426982	0.129647	Collagen_biosynthesis_and_modifying_enzymes	Col14a1;Col11a1;Col12a1;Col19a1;Col6a2;
R-MMU-1474228	137	9	4.1572	2.16492	0.0452926	0.136286	Degradation_of_the_extracellular_matrix	Klk1;Col11a1;Col12a1;Elane;Spock3;Col19a1;Fn1;Col6a2;Ctsg;
R-MMU-111997	25	3	0.373603	8.02991	0.0465359	0.136342	CaM_pathway	Prkcg;Adcy8;Prkar2b;
R-MMU-111933	25	3	0.41353	7.25461	0.0465359	0.136342	Calmodulin_induced_events	Prkar2b;Adcy8;Prkcg;
R-MMU-5223345	25	3	0.670203	4.47626	0.0465359	0.136342	Miscellaneous_transport_and_binding_events	Dmtn;Add2;Nipa1;
R-MMU-1566948	42	4	1.37029	2.91908	0.0470608	0.136681	Elastic_fibre_formation	Loxl2;Mfap2;Fn1;Emilin2;
R-MMU-351906	11	2	0.184463	10.8423	0.0480383	0.137135	Apoptotic_cleavage_of_cell_adhesion__proteins	Dsg3;Dsg1a;
R-MMU-1362409	11	2	0.212069	9.43089	0.0480383	0.137135	Mitochondrial_iron-sulfur_cluster_biogenesis	Glrx5;Isca1;
R-MMU-5689880	179	11	5.73796	1.91706	0.0500975	0.141802	Ub-specific_processing_proteases	H2ac13;H2ac4;H2ac18;Clspn;H2ac8;H2ac7;H2ac15;H2aw;Ccna2;Cdc20;H2ac10;
R-MMU-3000178	43	4	1.40292	2.8512	0.0506092	0.142046	ECM_proteoglycans	Tnn;Col6a2;Fn1;Tnr;
R-MMU-1489509	26	3	0.815651	3.67804	0.0513784	0.143003	DAG_and_IP3_signaling	Prkcg;Adcy8;Prkar2b;
R-MMU-373760	63	5	1.46612	3.41036	0.0540618	0.149228	L1CAM_interactions	Ank1;Kif4;Ncam1;Spta1;Sptbn2;
R-MMU-166786	12	2	0.171116	11.688	0.0564312	0.150846	Creation_of_C4_and_C2_activators	C1s2;Fcnb;
R-MMU-75035	12	2	0.277892	7.19704	0.0564312	0.150846	Chk1/Chk2(Cds1)_mediated_inactivation_of_Cyclin_B:Cdk1_complex	Cdk1;Ccnb1;
R-MMU-1475029	12	2	0.365503	5.47191	0.0564312	0.150846	Reversible_hydration_of_carbon_dioxide	Car2;Car1;
R-MMU-111996	27	3	0.859343	3.49104	0.0564545	0.150846	Ca-dependent_events	Prkar2b;Prkcg;Adcy8;
R-MMU-4551638	64	5	1.05864	4.72306	0.0571515	0.151497	SUMOylation_of_chromatin_organization_proteins	H4c12;H4f16;H4c11;H4c1;H4c6;
R-MMU-2022090	65	5	1.97239	2.53499	0.0603408	0.158692	Assembly_of_collagen_fibrils_and_other_multimeric_structures	Col14a1;Col6a2;Col11a1;Col12a1;Loxl2;
R-MMU-2142691	29	3	0.744353	4.03035	0.0672869	0.175577	Synthesis_of_Leukotrienes_(LT)_and_Eoxins_(EX)	Cyp4b1;Alox5;Cyp4a32;
R-MMU-1474290	90	6	2.18686	2.74366	0.0733013	0.188328	Collagen_formation	Col12a1;Col11a1;Loxl2;Col6a2;Col19a1;Col14a1;
R-MMU-432040	30	3	0.941136	3.18764	0.0730318	0.188328	Vasopressin_regulates_renal_water_homeostasis_via_Aquaporins	Aqp1;Prkar2b;Aqp4;
R-MMU-5633008	14	2	0.445585	4.48848	0.0745757	0.19014	TP53_Regulates_Transcription_of_Cell_Death_Genes	Pidd1;Steap3;
R-MMU-983712	171	10	5.28645	1.89163	0.0754965	0.191029	Ion_channel_transport	Pln;Atp9a;Clcn2;Atp1b2;Atp7b;Atp2b4;Ano3;Trpv5;Fxyd4;Atp6v0e2;
R-MMU-352230	31	3	0.993726	3.01894	0.0789876	0.19688	Amino_acid_transport_across_the_plasma_membrane	Slc16a10;Slc38a5;Slc43a1;
R-MMU-6794361	31	3	0.993726	3.01894	0.0789876	0.19688	Neurexins_and_neuroligins	Nrxn1;Epb41;Nrxn3;
R-MMU-5578775	51	4	1.63484	2.44672	0.0840449	0.207933	Ion_homeostasis	Atp1b2;Atp2b4;Pln;Fxyd4;
R-MMU-163615	16	2	0.421629	4.74351	0.0942813	0.229854	PKA_activation	Adcy8;Prkar2b;
R-MMU-111931	16	2	0.522017	3.83129	0.0942813	0.229854	PKA-mediated_phosphorylation_of_CREB	Adcy8;Prkar2b;
R-MMU-2173782	34	3	0.818389	3.66574	0.0980549	0.235614	Binding_and_Uptake_of_Ligands_by_Scavenger_Receptors	Hbb-bs;Cd163;Hbb-bt;
R-MMU-156590	34	3	1.03559	2.89689	0.0980549	0.235614	Glutathione_conjugation	Mgst3;Gclm;Gstm5;
R-MMU-176409	76	5	2.43623	2.05235	0.101871	0.241312	APC/C:Cdc20_mediated_degradation_of_mitotic_proteins	Cdc20;Ube2c;Ccna2;Cdk1;Ccnb1;
R-MMU-425366	76	5	2.43623	2.05235	0.101871	0.241312	Transport_of_bile_salts_and_organic_acids,_metal_ions_and_amine_compounds	Slc6a9;Slc30a10;Slc14a1;Rhag;Slc22a4;
R-MMU-5686938	17	2	0.2812	7.11238	0.104633	0.243049	Regulation_of_TLR_by_endogenous_ligand	S100a8;S100a9;
R-MMU-1442490	55	4	0.985056	4.06068	0.10396	0.243049	Collagen_degradation	Col19a1;Col11a1;Col12a1;Col6a2;
R-MMU-2129379	35	3	1.11796	2.68347	0.104788	0.243049	Molecules_associated_with_elastic_fibres	Fn1;Mfap2;Emilin2;
R-MMU-176814	77	5	1.99395	2.50758	0.106213	0.244657	Activation_of_APC/C_and_APC/C:Cdc20_mediated_degradation_of_mitotic_proteins	Cdc20;Ccna2;Cdk1;Ube2c;Ccnb1;
R-MMU-140877	36	3	1.09651	2.73596	0.111697	0.255526	Formation_of_Fibrin_Clot_(Clotting_Cascade)	Serpine2;Cd177;F2r;
R-MMU-1592389	57	4	1.31999	3.03034	0.114655	0.260146	Activation_of_Matrix_Metalloproteinases	Elane;Spock3;Ctsg;Klk1;
R-MMU-166663	18	2	0.435318	4.59434	0.115274	0.260146	Initial_triggering_of_complement	C1s2;Fcnb;
R-MMU-1852241	222	3	6.0527	0.495646	0.123889	0.27586	Organelle_biogenesis_and_maintenance	Cdk1;Ninl;Prkar2b;
R-MMU-195721	222	3	6.76181	0.443668	0.123889	0.27586	Signaling_by_WNT	Sox6;Prkcg;Wnt2b;
R-MMU-419037	19	2	0.286105	6.99044	0.126176	0.279091	NCAM1_interactions	Ncam1;Col6a2;
R-MMU-6803157	93	6	2.64168	2.27128	0.127936	0.281123	Antimicrobial_peptides	Elane;Lcn2;Ctsg;S100a8;Camp;S100a9;
R-MMU-199991	537	11	12.987	0.847001	0.130491	0.284863	Membrane_Trafficking	Hbegf;Kifc5b;Rab27b;Tfrc;Kif18b;Ank1;Rab3il1;Itsn1;Spta1;Kif4;Sptbn2;
R-MMU-112043	39	3	0.889802	3.37154	0.133411	0.289346	PLC_beta_mediated_events	Adcy8;Prkar2b;Prkcg;
R-MMU-2453902	20	2	0.353639	5.65548	0.13731	0.291063	The_canonical_retinoid_cycle_in_rods_(twilight_vision)	Abca4;Rbp4;
R-MMU-109581	98	6	3.14146	1.90994	0.13856	0.291063	Apoptosis	Clspn;Dsg1a;Dsg3;Bcl2l1;H1f5;Lmna;
R-MMU-5688426	241	12	7.72542	1.55331	0.137716	0.291063	Deubiquitination	H2aw;H2ac15;Cdk1;Ccna2;H2ac10;Cdc20;H2ac13;H2ac18;H2ac4;Clspn;H2ac7;H2ac8;
R-MMU-176407	20	2	0.641113	3.11958	0.13731	0.291063	Conversion_from_APC/C:Cdc20_to_APC/C:Cdh1_in_late_anaphase	Cdc20;Ube2c;
R-MMU-211979	20	2	0.652521	3.06503	0.13731	0.291063	Eicosanoids	Cyp4b1;Cyp4a32;
R-MMU-112040	40	3	1.26397	2.37347	0.140953	0.294239	G-protein_mediated_events	Prkcg;Prkar2b;Adcy8;
R-MMU-141405	21	2	0.543806	3.67778	0.148649	0.306473	Inhibition_of_the_proteolytic_activity_of_APC/C_required_for_the_onset_of_anaphase_by_mitotic_spindle_checkpoint_components	Ube2c;Cdc20;
R-MMU-141430	21	2	0.663587	3.01392	0.148649	0.306473	Inactivation_of_APC/C_via_direct_inhibition_of_the_APC/C_complex	Cdc20;Ube2c;
R-MMU-446203	256	4	8.35227	0.478912	0.150568	0.308525	Asparagine_N-linked_glycosylation	St3gal5;Spta1;Sptbn2;Ank1;
R-MMU-1296072	42	3	1.31759	2.27688	0.156448	0.318619	Voltage_gated_Potassium_channels	Kcnf1;Kcnq1;Kcnab1;
R-MMU-75876	22	2	0.682637	2.92982	0.160168	0.322266	Synthesis_of_very_long-chain_fatty_acyl-CoAs	Acsl6;Hacd1;
R-MMU-112409	22	2	0.695186	2.87693	0.160168	0.322266	RAF-independent_MAPK1/3_activation	Cdk1;Dusp8;
R-MMU-5668599	24	2	0.372348	5.37132	0.183654	0.360827	RHO_GTPases_Activate_NADPH_Oxidases	S100a9;S100a8;
R-MMU-166658	45	3	1.3963	2.14853	0.180605	0.360827	Complement_cascade	C1s2;Fcnb;Elane;
R-MMU-1483191	24	2	0.752909	2.65636	0.183654	0.360827	Synthesis_of_PC	Pcyt1b;Abhd3;
R-MMU-211935	24	2	0.769336	2.59964	0.183654	0.360827	Fatty_acids	Cyp4b1;Cyp4a32;
R-MMU-5576891	113	6	3.68674	1.62745	0.186629	0.364527	Cardiac_conduction	Fxyd4;Pln;Atp1b2;Atp2b4;Fgf12;Kcnq1;
R-MMU-193648	47	3	1.453	2.06469	0.197235	0.383003	NRAGE_signals_death_through_JNK	Arhgef37;Itsn1;Arhgef16;
R-MMU-71291	247	4	7.91775	0.505194	0.198961	0.384122	Metabolism_of_amino_acids_and_derivatives	Smox;Asns;Nqo1;Slc25a21;
R-MMU-453276	85	5	1.406	3.55619	0.20288	0.387212	Regulation_of_mitotic_cell_cycle	Cdc20;Ube2c;Cdk1;Ccna2;Ccnb1;
R-MMU-174143	85	5	2.77321	1.80296	0.20288	0.387212	APC/C-mediated_degradation_of_cell_cycle_proteins	Ccnb1;Ube2c;Ccna2;Cdk1;Cdc20;
R-MMU-2980766	48	3	1.45654	2.05968	0.205686	0.389531	Nuclear_Envelope_Breakdown	Lmna;Cdk1;Ccnb1;
R-MMU-179409	26	2	0.827515	2.41688	0.207594	0.389531	APC-Cdc20_mediated_degradation_of_Nek2A	Cdc20;Ube2c;
R-MMU-8874081	26	2	0.833447	2.39967	0.207594	0.389531	MET_activates_PTK2_signaling	Fn1;Col11a1;
R-MMU-1482788	27	2	0.526694	3.79727	0.219686	0.401097	Acyl_chain_remodelling_of_PC	Mboat2;Pla2g4c;
R-MMU-211958	27	2	0.74538	2.68319	0.219686	0.401097	Miscellaneous_substrates	Cyp4b1;Cyp4a32;
R-MMU-1482839	27	2	0.819302	2.4411	0.219686	0.401097	Acyl_chain_remodelling_of_PE	Pla2g4c;Mboat2;
R-MMU-499943	27	2	0.862423	2.31905	0.219686	0.401097	Interconversion_of_nucleotide_di-_and_triphosphates	Tyms;Rrm2;
R-MMU-5617833	194	3	6.19667	0.484131	0.219763	0.401097	Cilium_Assembly	Cdk1;Ninl;Prkar2b;
R-MMU-71406	51	3	1.20431	2.49105	0.231497	0.418554	Pyruvate_metabolism_and_Citric_Acid_(TCA)_cycle	Fahd1;Glo1;Hagh;
R-MMU-70268	28	2	0.897559	2.22827	0.231834	0.418554	Pyruvate_metabolism	Hagh;Glo1;
R-MMU-500792	382	8	6.31873	1.26608	0.237143	0.425838	GPCR_ligand_binding	Htr2a;Prokr1;F2r;Kel;Aplnr;Tac2;Grm8;P2ry1;
R-MMU-983189	52	3	1.6669	1.79975	0.240232	0.429077	Kinesins	Kifc5b;Kif4;Kif18b;
R-MMU-418597	30	2	0.978782	2.04336	0.256236	0.455228	G_alpha_(z)_signalling_events	Adcy8;Rgs17;
R-MMU-425393	99	5	1.5924	3.13991	0.258373	0.456597	Transport_of_inorganic_cations/anions_and_amino_acids/oligopeptides	Slc38a5;Slc4a1;Slc26a3;Slc43a1;Slc16a10;
R-MMU-3301854	31	2	0.802761	2.4914	0.26846	0.471925	Nuclear_Pore_Complex_(NPC)_Disassembly	Cdk1;Ccnb1;
R-MMU-5357801	114	6	3.16016	1.89864	0.277198	0.48221	Programmed_Cell_Death	Lmna;H1f5;Bcl2l1;Dsg1a;Dsg3;Clspn;
R-MMU-1483206	114	6	3.5243	1.70247	0.277198	0.48221	Glycerophospholipid_biosynthesis	Ptdss2;Pcyt1b;Pla2g4c;Gpd1;Abhd3;Mboat2;
R-MMU-71387	264	5	8.31212	0.601532	0.287471	0.497489	Metabolism_of_carbohydrates	Hmmr;Eno1b;Fut10;Bpgm;Aldh1a1;
R-MMU-6811442	178	3	4.56879	0.656629	0.289704	0.498769	Intra-Golgi_and_retrograde_Golgi-to-ER_traffic	Kif4;Kifc5b;Kif18b;
R-MMU-75105	33	2	1.05784	1.89065	0.292886	0.501661	Fatty_acyl-CoA_biosynthesis	Hacd1;Acsl6;
R-MMU-8854518	71	4	2.19496	1.82236	0.295024	0.502744	AURKA_Activation_by_TPX2	Hmmr;Prkar2b;Ninl;Cdk1;
R-MMU-176187	34	2	0.616701	3.24306	0.305063	0.504411	Activation_of_ATR_in_response_to_replication_stress	Clspn;Cdc6;
R-MMU-6806003	34	2	0.822268	2.4323	0.305063	0.504411	Regulation_of_TP53_Expression_and_Degradation	Cdk1;Ccna2;
R-MMU-3299685	34	2	1.0705	1.86829	0.305063	0.504411	Detoxification_of_Reactive_Oxygen_Species	Prdx2;Txnrd2;
R-MMU-6798695	514	21	16.7698	1.25225	0.303894	0.504411	Neutrophil_degranulation	Lilra5;Lilra6;Ctsg;H2-Q1;Alad;Hbb-bt;Elane;Hbb-bs;S100a8;Mpo;Folr2;Hebp2;Ms4a3;Acpp;Lcn2;Fcnb;Dsg1a;Alox5;Cd177;S100a9;Camp;
R-MMU-6804757	34	2	1.10929	1.80296	0.305063	0.504411	Regulation_of_TP53_Degradation	Ccna2;Cdk1;
R-MMU-174184	73	4	2.3817	1.67947	0.30261	0.504411	Cdc20:Phospho-APC/C_mediated_degradation_of_Cyclin_A	Ube2c;Ccna2;Cdk1;Cdc20;
R-MMU-179419	74	4	2.37212	1.68626	0.306647	0.504533	APC:Cdc20_mediated_degradation_of_cell_cycle_proteins_prior_to_satisfation_of_the_cell_cycle_checkpoint	Cdc20;Ccna2;Cdk1;Ube2c;
R-MMU-5653656	570	14	10.0787	1.38907	0.328055	0.528052	Vesicle-mediated_transport	Ank1;Kif18b;Tfrc;Rab27b;Kifc5b;Hbegf;Cd163;Kif4;Sptbn2;Spta1;Rab3il1;Itsn1;Hbb-bs;Hbb-bt;
R-MMU-8875878	36	2	0.743326	2.69061	0.329289	0.528052	MET_promotes_cell_motility	Col11a1;Fn1;
R-MMU-1222556	36	2	1.0924	1.83083	0.329289	0.528052	ROS_and_RNS_production_in_phagocytes	Mpo;Atp6v0e2;
R-MMU-5358351	137	2	4.23534	0.472217	0.330428	0.528052	Signaling_by_Hedgehog	Prkar2b;Adcy8;
R-MMU-163841	36	2	1.13347	1.76449	0.329289	0.528052	Gamma_carboxylation,_hypusine_formation_and_arylsulfatase_activation	Fn3k;Fn3krp;
R-MMU-977606	36	2	1.154	1.7331	0.329289	0.528052	Regulation_of_Complement_cascade	Elane;C1s2;
R-MMU-168898	140	2	3.59343	0.556571	0.332332	0.528531	Toll-like_Receptor_Cascades	S100a8;S100a9;
R-MMU-425407	224	10	7.0016	1.42825	0.335475	0.528531	SLC-mediated_transmembrane_transport	Rhag;Slc26a3;Slc22a4;Slc38a5;Slc16a10;Slc43a1;Slc4a1;Slc30a10;Slc6a9;Slc14a1;
R-MMU-5633007	142	2	4.5519	0.439376	0.334174	0.528531	Regulation_of_TP53_Activity	Cdk1;Ccna2;
R-MMU-556833	594	15	16.8049	0.892595	0.3392	0.531891	Metabolism_of_lipids	Ptdss2;Hacd1;Gpd1;Cyp4a32;Cyp11a1;Sphk1;Mboat2;Acsl6;Pcyt1b;Abhd3;Pla2g4c;Ugt8a;Cyp4b1;Alox5;Baat;
R-MMU-3000171	38	2	1.21812	1.64188	0.35328	0.548003	Non-integrin_membrane-ECM_interactions	Fn1;Col11a1;
R-MMU-2565942	84	4	2.69268	1.48551	0.354397	0.548003	Regulation_of_PLK1_Activity_at_G2/M_Transition	Cdk1;Prkar2b;Ccnb1;Ninl;
R-MMU-3108232	154	7	4.93657	1.41799	0.353954	0.548003	SUMO_E3_ligases_SUMOylate_target_proteins	Birc5;H4c11;H4c6;H4c12;Cdca8;H4f16;H4c1;
R-MMU-9006925	252	5	6.06571	0.824306	0.364182	0.560538	Intracellular_signaling_by_second_messengers	Il1rl1;Prkcg;Hbegf;Adcy8;Prkar2b;
R-MMU-2990846	159	7	4.77036	1.46739	0.366102	0.560909	SUMOylation	H4c12;H4f16;Cdca8;H4c1;H4c11;Birc5;H4c6;
R-MMU-2559582	40	2	0.574949	3.47857	0.376965	0.574915	Senescence-Associated_Secretory_Phenotype_(SASP)	Ccna2;Ube2c;
R-MMU-1428517	165	3	5.17625	0.57957	0.379117	0.575569	The_citric_acid_(TCA)_cycle_and_respiratory_electron_transport	Hagh;Fahd1;Glo1;
R-MMU-948021	171	3	5.48152	0.547293	0.381046	0.57588	Transport_to_the_Golgi_and_subsequent_modification	Sptbn2;Ank1;Spta1;
R-MMU-4615885	41	2	1.2488	1.60153	0.388674	0.58214	SUMOylation_of_DNA_replication_proteins	Birc5;Cdca8;
R-MMU-168256	1573	57	51.3208	1.11066	0.38854	0.58214	Immune_System	Kif18b;H3c15;Acpp;Folr2;Cd177;S100a9;Camp;Dsg1a;Pianp;Cd300ld4;Alox5;Il1rl1;Asb1;Alad;Ccnf;Lilra6;H3c1;Ube2c;H2-Q1;Ms4a2;Asb11;Atp6v0e2;Asb17;Mpo;Cd300ld3;Ubac1;Hbb-bs;C1s2;Hebp2;Ms4a3;Fbxo30;Kifc5b;Bcl2l1;Lcn2;Fcnb;H3c11;H3c4;Kif4;H3c3;Cd300e;Ctsg;Sptbn2;Icam4;Lrr1;Ube2o;Ube2l6;Ctse;H3c7;Cdc20;Lilra5;Cd209e;H3c10;H3c8;S100a8;Hbb-bt;Elane;Cd300ld5;
R-MMU-1430728	1750	51	52.3044	0.975062	0.407926	0.608247	Metabolism	Car2;Cacna1a;Isca1;Cyp4b1;Nqo1;Glo1;Alas2;Urod;Aldh1a1;Ppox;Gclm;Bpgm;Glrx5;Nt5c3;Cyp11a1;Uros;Fahd1;Gpd1;Rrm2;Hacd1;Mgst3;Pnpo;Parp16;Ptdss2;Abcg2;Asns;Baat;Alox5;Slc25a21;Ugt8a;Smox;Pla2g4c;Hmbs;Hmmr;Abhd3;Pcyt1b;Hagh;Folr2;Tyms;Acsl6;Gstm5;Rbp4;Mboat2;Prkar2b;Cpox;Fut10;Eno1b;Sphk1;Cyp4a32;Alad;Car1;
R-MMU-211945	111	5	3.55818	1.40521	0.413767	0.614213	Phase_I_-_Functionalization_of_compounds	Cyp4b1;Aldh1a1;Cyp11a1;Cyp4a32;Smox;
R-MMU-2142753	62	3	1.86721	1.60667	0.45653	0.674695	Arachidonic_acid_metabolism	Cyp4a32;Cyp4b1;Alox5;
R-MMU-204998	65	3	2.08362	1.4398	0.471416	0.690583	Cell_death_signalling_via_NRAGE,_NRIF_and_NADE	Arhgef16;Arhgef37;Itsn1;
R-MMU-2995410	65	3	2.08362	1.4398	0.471416	0.690583	Nuclear_Envelope_(NE)_Reassembly	Cdk1;Ccnb1;Lmna;
R-MMU-6794362	66	3	2.04038	1.47031	0.476613	0.695148	Protein-protein_interactions_at_synapses	Nrxn1;Epb41;Nrxn3;
R-MMU-111885	69	3	1.7553	1.70911	0.492791	0.700392	Opioid_Signalling	Prkar2b;Adcy8;Prkcg;
R-MMU-380284	68	3	1.79968	1.66696	0.487309	0.700392	Loss_of_proteins_required_for_interphase_microtubule_organization_from_the_centrosome	Prkar2b;Ninl;Cdk1;
R-MMU-380259	68	3	2.04791	1.46491	0.487309	0.700392	Loss_of_Nlp_from_mitotic_centrosomes	Prkar2b;Ninl;Cdk1;
R-MMU-416482	69	3	2.10164	1.42745	0.492791	0.700392	G_alpha_(12/13)_signalling_events	Arhgef16;Arhgef37;Itsn1;
R-MMU-216083	69	3	2.141	1.40122	0.492791	0.700392	Integrin_cell_surface_interactions	Icam4;Fn1;Col6a2;
R-MMU-6805567	153	3	4.99179	0.600987	0.491863	0.700392	Keratinization	Pkp2;Dsg3;Dsg1a;
R-MMU-983168	282	11	5.62971	1.95392	0.494926	0.700447	Antigen_processing:_Ubiquitination_&_Proteasome_degradation	Ube2c;Ccnf;Cdc20;Asb11;Lrr1;Ube2o;Ube2l6;Asb17;Fbxo30;Asb1;Ubac1;
R-MMU-162582	2353	82	29.5266	2.77716	0.497516	0.701141	Signal_Transduction	Ncam1;Cenpf;Col6a2;S100a9;Cit;Grm8;Hbegf;H3c1;Nuf2;Sox6;Adcy8;Cdk1;Ntrk2;Col11a1;P2ry1;Prkar2b;Cenps;Birc5;Cenph;Sphk1;Kel;H4c11;Arhgef37;Aldh1a1;Prkcg;H4c1;Fgfrl1;H2bc13;Bcl2l1;Sptbn2;Depdc1b;Ranbp10;Sh2b2;Abca4;H3c3;H3c11;Cdc20;H3c7;Htr2a;Olfr420;Arhgap33;Cdca8;H4f16;Itsn1;Gpsm2;H3c8;Arhgef16;H3c10;Cnga1;Aplnr;Wnt2b;H2bc9;H4c6;H2bc12;Myh10;H3c15;Prokr1;Fn1;H4c12;Cenpk;Il1rl1;Spta1;Atp6v0e2;Rbp4…
R-MMU-373076	297	7	6.77618	1.03303	0.504065	0.704425	Class_A/1_(Rhodopsin-like_receptors)	Htr2a;Prokr1;Kel;F2r;Tac2;Aplnr;P2ry1;
R-MMU-397014	166	7	4.3744	1.60022	0.502347	0.704425	Muscle_contraction	Atp2b4;Fxyd4;Tmod1;Kcnq1;Fgf12;Pln;Atp1b2;
R-MMU-69017	73	3	1.64887	1.81943	0.51544	0.714345	CDK-mediated_phosphorylation_and_removal_of_Cdc6	Ccna2;Ube2c;Cdc6;
R-MMU-6806834	73	3	2.26512	1.32444	0.51544	0.714345	Signaling_by_MET	Col11a1;Ranbp10;Fn1;
R-MMU-69275	176	7	5.6418	1.24074	0.519549	0.717063	G2/M_Transition	Prkar2b;Gtse1;Ninl;Ccnb1;Hmmr;Ccna2;Cdk1;
R-MMU-453274	178	7	5.36071	1.3058	0.523786	0.719937	Mitotic_G2-G2/M_phases	Gtse1;Prkar2b;Cdk1;Ccna2;Ninl;Ccnb1;Hmmr;
R-MMU-597592	1242	44	37.5462	1.17189	0.546156	0.747607	Post-translational_protein_modification	Cdc20;Thsd7b;Lrr1;Sptbn2;H2bc7;H2bc9;H2ac15;H4c6;Cdca8;H4f16;St3gal5;H4c11;H2aw;Pigq;Ank1;Clspn;H2bc13;Rab27b;H2bc11;Fbxo30;H4c1;H2ac10;Cdk1;Asb11;Spta1;Ube2c;Muc15;Ccnf;Birc5;Ccna2;Fn3krp;Prss41;H2ac7;H2ac8;H2ac4;Asb17;Fn1;Folr2;H2bc12;H2ac13;Asb1;H4c12;H2ac18;Fn3k;
R-MMU-211859	209	8	6.07974	1.31585	0.55572	0.757594	Biological_oxidations	Gstm5;Cyp4b1;Gclm;Aldh1a1;Cyp4a32;Smox;Mgst3;Cyp11a1;
R-MMU-382556	99	4	3.15092	1.26947	0.56628	0.768852	ABC-family_proteins_mediated_transport	Abcb4;Abca4;Abcg4;Abcb6;
R-MMU-1280218	666	24	21.3491	1.12417	0.570921	0.772015	Adaptive_Immune_System	Kif18b;Asb1;Kifc5b;Cd300ld4;Pianp;Fbxo30;Asb11;Cdc20;Ctse;Ube2l6;Ube2o;Lrr1;Icam4;H2-Q1;Sptbn2;Cd300e;Ube2c;Ccnf;Kif4;Cd300ld5;Ubac1;Cd300ld3;Asb17;Cd209e;
R-MMU-9675108	259	10	3.87052	2.58363	0.591371	0.77458	Nervous_system_development	Itsn1;Col6a2;Epha4;Spta1;Reln;Slit3;Ank1;Sptbn2;Kif4;Ncam1;
R-MMU-446652	106	2	1.705	1.17302	0.58674	0.77458	Interleukin-1_family_signaling	Il1rl1;Ctsg;
R-MMU-975957	111	2	2.00068	0.999658	0.588382	0.77458	Nonsense_Mediated_Decay_(NMD)_enhanced_by_the_Exon_Junction_Complex_(EJC)	Gspt2;Magohb;
R-MMU-422475	258	10	7.97604	1.25375	0.590619	0.77458	Axon_guidance	Spta1;Reln;Slit3;Sptbn2;Ank1;Ncam1;Kif4;Col6a2;Itsn1;Epha4;
R-MMU-5610787	106	2	3.33744	0.599262	0.58674	0.77458	Hedgehog_'off'_state	Prkar2b;Adcy8;
R-MMU-449147	258	10	8.27036	1.20914	0.590619	0.77458	Signaling_by_Interleukins	H3c3;H3c11;H3c4;H3c1;Ctsg;H3c15;H3c7;H3c8;H3c10;Il1rl1;
R-MMU-9007101	110	2	3.52612	0.567195	0.587823	0.77458	Rab_regulation_of_trafficking	Rab3il1;Rab27b;
R-MMU-927802	111	2	3.55818	0.562085	0.588382	0.77458	Nonsense-Mediated_Decay_(NMD)	Gspt2;Magohb;
R-MMU-8957322	117	2	3.65708	0.546884	0.593971	0.774947	Metabolism_of_steroids	Cyp11a1;Baat;
R-MMU-2132295	131	5	3.63142	1.37687	0.619469	0.805069	MHC_class_II_antigen_presentation	Sptbn2;Kifc5b;Kif18b;Kif4;Ctse;
R-MMU-112316	323	12	8.10632	1.48033	0.630331	0.806475	Neuronal_System	Slc6a4;Cacna1a;Prkar2b;Nrxn1;Kcnq1;Prkcg;Epb41;Syn2;Adcy8;Nrxn3;Kcnab1;Kcnf1;
R-MMU-8856828	136	3	4.282	0.700607	0.630935	0.806475	Clathrin-mediated_endocytosis	Tfrc;Hbegf;Itsn1;
R-MMU-112314	136	3	4.32854	0.693074	0.630935	0.806475	Neurotransmitter_receptors_and_postsynaptic_signal_transmission	Adcy8;Prkar2b;Prkcg;
R-MMU-199977	143	3	4.58396	0.654456	0.632624	0.806475	ER_to_Golgi_Anterograde_Transport	Sptbn2;Ank1;Spta1;
R-MMU-168249	926	27	30.2117	0.893693	0.624428	0.806475	Innate_Immune_System	Mpo;Atp6v0e2;Cd209e;S100a8;Hbb-bs;Hbb-bt;Elane;Alad;H2-Q1;Cd300e;Ctsg;Lilra6;Ms4a2;Lilra5;S100a9;Camp;Cd177;Alox5;Dsg1a;Bcl2l1;Lcn2;Fcnb;C1s2;Acpp;Ms4a3;Hebp2;Folr2;
R-MMU-392499	1584	48	34.694	1.38352	0.639114	0.811651	Metabolism_of_proteins	Gspt2;Rab27b;H4c1;Fbxo30;H2bc11;H2bc13;Bche;Clspn;Ank1;H4c11;Pigq;H2aw;Cdca8;H4f16;St3gal5;H2bc9;H4c6;H2ac15;Sptbn2;Ctsg;H2bc7;Thsd7b;Cdc20;Lrr1;H4c12;Fn3k;H2ac18;Asb1;H2bc12;H2ac13;Folr2;Fn1;H2ac8;H2ac7;Asb17;H2ac4;Ccna2;Fn3krp;Birc5;Prss41;Sphk1;Ube2c;Ccnf;Muc15;Spta1;Asb11;Cdk1;H2ac10;
R-MMU-196854	178	4	4.6094	0.867792	0.666645	0.840224	Metabolism_of_vitamins_and_cofactors	Pnpo;Folr2;Parp16;Rbp4;
R-MMU-9006934	399	11	13.0178	0.844997	0.6657	0.840224	Signaling_by_Receptor_Tyrosine_Kinases	Sphk1;Hbegf;Fgfrl1;Atp6v0e2;Plat;Col6a2;Fn1;Col11a1;Ntrk2;Sh2b2;Ranbp10;
R-MMU-383280	49	2	0.76021	2.63085	0.674325	0.846709	Nuclear_Receptor_transcription_pathway	Rorc;Nr0b2;
R-MMU-186797	53	2	1.64454	1.21615	0.691605	0.865153	Signaling_by_PDGF	Plat;Col6a2;
R-MMU-76002	241	6	7.56046	0.793602	0.710871	0.885936	Platelet_activation,_signaling_and_aggregation	F2r;Serpinf2;P2ry1;Rab27b;Prkcg;Fn1;
R-MMU-2980736	58	2	1.85923	1.07571	0.714223	0.886805	Peptide_hormone_metabolism	Bche;Ctsg;
R-MMU-351202	59	2	1.86436	1.07275	0.71881	0.889195	Metabolism_of_polyamines	Smox;Nqo1;
R-MMU-2172127	60	2	1.87543	1.06642	0.723404	0.891576	DAP12_interactions	H2-Q1;Cd300e;
R-MMU-8852276	75	3	1.80527	1.6618	0.736877	0.899245	The_role_of_GTSE1_in_G2/M_progression_after_G2_checkpoint	Ccnb1;Cdk1;Gtse1;
R-MMU-380270	77	3	2.38045	1.26027	0.740396	0.899245	Recruitment_of_mitotic_centrosome_proteins_and_complexes	Cdk1;Ninl;Prkar2b;
R-MMU-211897	75	3	2.31862	1.29388	0.736877	0.899245	Cytochrome_P450_-_arranged_by_substrate_type	Cyp11a1;Cyp4a32;Cyp4b1;
R-MMU-380287	77	3	2.51221	1.19417	0.740396	0.899245	Centrosome_maturation	Cdk1;Prkar2b;Ninl;
R-MMU-163125	79	3	1.57712	1.90221	0.744222	0.899799	Post-translational_modification:_synthesis_of_GPI-anchored_proteins	Pigq;Folr2;Prss41;
R-MMU-193704	80	3	2.05339	1.461	0.74624	0.899799	p75_NTR_receptor-mediated_signalling	Arhgef37;Itsn1;Arhgef16;
R-MMU-6809371	82	3	2.33858	1.28283	0.750467	0.90164	Formation_of_the_cornified_envelope	Pkp2;Dsg3;Dsg1a;
R-MMU-983169	340	12	0.543007	22.0992	0.754513	0.903252	Class_I_MHC_mediated_antigen_processing_&_presentation	Asb11;Cdc20;Ube2l6;Ube2o;Lrr1;H2-Q1;Ube2c;Ccnf;Asb1;Ubac1;Asb17;Fbxo30;
R-MMU-199418	103	2	3.07849	0.64967	0.776162	0.910639	Negative_regulation_of_the_PI3K/AKT_network	Hbegf;Il1rl1;
R-MMU-5173105	93	2	2.82204	0.708707	0.771104	0.910639	O-linked_glycosylation	Muc15;Thsd7b;
R-MMU-69052	90	3	2.74127	1.09438	0.769384	0.910639	Switching_of_origins_to_a_post-replicative_state	Cdc6;Ube2c;Ccna2;
R-MMU-380320	88	3	2.68036	1.11925	0.764407	0.910639	Recruitment_of_NuMA_to_mitotic_centrosomes	Cdk1;Ninl;Prkar2b;
R-MMU-6811558	96	2	3.07734	0.649911	0.77185	0.910639	PI5P,_PP2A_and_IER3_Regulate_PI3K/AKT_Signaling	Il1rl1;Hbegf;
R-MMU-69206	104	2	3.33379	0.599918	0.777042	0.910639	G1/S_Transition	Ccna2;Cdc6;
R-MMU-76005	120	4	0.438056	9.13125	0.798004	0.925271	Response_to_elevated_platelet_cytosolic_Ca2+	Serpinf2;Fn1;Prkcg;Rab27b;
R-MMU-453279	127	3	2.86858	1.04581	0.800609	0.925271	Mitotic_G1_phase_and_G1/S_transition	Ccna2;E2f2;Cdc6;
R-MMU-8856688	124	3	3.89003	0.771202	0.800059	0.925271	Golgi-to-ER_retrograde_transport	Kif4;Kifc5b;Kif18b;
R-MMU-73887	120	4	3.84668	1.03986	0.798004	0.925271	Death_Receptor_Signalling	Sppl2b;Itsn1;Arhgef37;Arhgef16;
R-MMU-194840	139	5	3.34577	1.49442	0.807121	0.929581	Rho_GTPase_cycle	Depdc1b;Itsn1;Arhgef16;Arhgef37;Arhgap33;
R-MMU-375276	184	5	3.67328	1.36118	0.834955	0.958334	Peptide_ligand-binding_receptors	Kel;F2r;Aplnr;Tac2;Prokr1;
R-MMU-416476	198	7	6.0308	1.16071	0.838042	0.958583	G_alpha_(q)_signalling_events	F2r;P2ry1;Rgs17;Prokr1;Tac2;Htr2a;Hbegf;
R-MMU-5673001	256	7	7.94342	0.881233	0.857302	0.977266	RAF/MAP_kinase_cascade	Fn1;Spta1;Ncam1;Sptbn2;Bcl2l1;Dusp8;Hbegf;
R-MMU-5683057	285	8	9.13587	0.87567	0.864657	0.982298	MAPK_family_signaling_cascades	Bcl2l1;Hbegf;Dusp8;Ncam1;Sptbn2;Fn1;Cdk1;Spta1;
R-MMU-418594	346	10	9.11773	1.09676	0.87677	0.992682	G_alpha_(i)_signalling_events	Aplnr;Cnga1;Gpsm2;Prkar2b;Grm8;Rbp4;Rgs17;Prkcg;Abca4;Adcy8;
R-MMU-1280215	378	11	5.69199	1.93254	0.881833	0.995042	Cytokine_Signaling_in_Immune_system	H3c3;H3c4;H3c11;Ctsg;H3c1;H3c15;Ube2l6;H3c7;H3c8;H3c10;Il1rl1;
R-MMU-9009391	68	2	0.263746	7.58305	1	1	Extra-nuclear_estrogen_signaling	Hbegf;Sphk1;
R-MMU-70171	61	2	0.250513	7.98362	1	1	Glycolysis	Eno1b;Bpgm;
R-MMU-2682334	65	2	1.04552	1.91293	1	1	EPH-Ephrin_signaling	Itsn1;Epha4;
R-MMU-8939236	66	2	1.07666	1.8576	1	1	RUNX1_regulates_transcription_of_genes_involved_in_differentiation_of_HSCs	Gata1;Tal1;
R-MMU-3700989	281	9	5.80208	1.55117	1	1	Transcriptional_Regulation_by_TP53	Steap3;Pidd1;E2f8;Ccna2;E2f7;Prdx2;Cdk1;Gadd45a;Ccnb1;
R-MMU-69242	143	4	3.01791	1.32542	1	1	S_Phase	Cdc6;Ube2c;Esco2;Ccna2;
R-MMU-114608	115	3	2.62377	1.14339	1	1	Platelet_degranulation_	Rab27b;Fn1;Serpinf2;
R-MMU-5684996	262	8	6.18686	1.29306	1	1	MAPK1/MAPK3_signaling	Fn1;Cdk1;Spta1;Ncam1;Sptbn2;Bcl2l1;Dusp8;Hbegf;
R-MMU-8876198	86	2	2.07985	0.961606	1	1	RAB_GEFs_exchange_GTP_for_GDP_on_RABs	Rab3il1;Rab27b;
R-MMU-174154	68	2	1.74538	1.14588	1	1	APC/C:Cdc20_mediated_degradation_of_Securin	Cdc20;Ube2c;
R-MMU-196849	116	3	3.00388	0.998709	1	1	Metabolism_of_water-soluble_vitamins_and_cofactors	Pnpo;Folr2;Parp16;
R-MMU-8856825	98	3	2.53776	1.18215	1	1	Cargo_recognition_for_clathrin-mediated_endocytosis	Itsn1;Hbegf;Tfrc;
R-MMU-69306	123	4	3.57803	1.11793	1	1	DNA_Replication	Cdc6;E2f2;Ube2c;Ccna2;
R-MMU-159236	69	2	2.07803	0.96245	1	1	Transport_of_Mature_mRNA_derived_from_an_Intron-Containing_Transcript	Nxf7;Magohb;
R-MMU-202733	108	3	3.27721	0.915414	1	1	Cell_surface_interactions_at_the_vascular_wall	Cd177;Fn1;Atp1b2;
R-MMU-174178	74	2	2.24549	0.890673	1	1	APC/C:Cdh1_mediated_degradation_of_Cdc20_and_other_APC/C:Cdh1_targeted_proteins_in_late_mitosis/early_G1	Cdc20;Ube2c;
R-MMU-428157	82	2	2.4976	0.800767	1	1	Sphingolipid_metabolism	Sphk1;Ugt8a;
R-MMU-8951664	214	7	6.61579	1.05808	1	1	Neddylation	Fbxo30;Asb17;Ccnf;Lrr1;Asb11;Asb1;Birc5;
R-MMU-6807878	92	3	2.87566	1.04324	1	1	COPI-mediated_anterograde_transport	Ank1;Sptbn2;Spta1;
R-MMU-69002	82	2	2.57244	0.777472	1	1	DNA_Replication_Pre-Initiation	Cdc6;E2f2;
R-MMU-68949	70	2	2.19598	0.910753	1	1	Orc1_removal_from_chromatin	Ccna2;Cdc6;
R-MMU-8978868	172	5	5.41547	0.923281	1	1	Fatty_acid_metabolism	Cyp4a32;Cyp4b1;Acsl6;Hacd1;Alox5;
R-MMU-1296071	98	3	3.08556	0.972271	1	1	Potassium_Channels	Kcnab1;Kcnf1;Kcnq1;
R-MMU-72202	78	2	2.45585	0.814381	1	1	Transport_of_Mature_Transcript_to_Cytoplasm	Nxf7;Magohb;
R-MMU-5620912	95	3	2.9911	1.00297	1	1	Anchoring_of_the_basal_body_to_the_plasma_membrane	Cdk1;Ninl;Prkar2b;
R-MMU-1266738	462	14	14.5989	0.958976	0.893039	1	Developmental_Biology	Reln;Spta1;Slit3;Ank1;Sptbn2;Kif4;Ncam1;Pkp2;Dsg3;Dsg1a;Itsn1;Col6a2;Lgi1;Epha4;
R-MMU-6811434	91	3	2.87554	1.04328	1	1	COPI-dependent_Golgi-to-ER_retrograde_traffic	Kif4;Kifc5b;Kif18b;
R-MMU-2187338	91	3	2.87554	1.04328	1	1	Visual_phototransduction	Abca4;Cnga1;Rbp4;
R-MMU-70326	80	2	2.55533	0.782679	1	1	Glucose_metabolism	Bpgm;Eno1b;
R-MMU-68867	67	2	2.14773	0.931216	1	1	Assembly_of_the_pre-replicative_complex	Cdc6;E2f2;
R-MMU-15869	95	3	3.04529	0.985128	1	1	Metabolism_of_nucleotides	Nt5c3;Rrm2;Tyms;
R-MMU-8878166	63	2	2.01951	0.990341	1	1	Transcriptional_regulation_by_RUNX2	Cdk1;Ccnb1;
R-MMU-1483257	186	6	5.96235	1.00631	1	1	Phospholipid_metabolism	Gpd1;Abhd3;Mboat2;Pcyt1b;Pla2g4c;Ptdss2;
R-MMU-69239	115	3	3.6864	0.813802	1	1	Synthesis_of_DNA	Ccna2;Ube2c;Cdc6;
R-MMU-163685	78	2	2.54483	0.785906	1	1	Integration_of_energy_metabolism	Prkar2b;Cacna1a;
R-MMU-112315	199	6	6.49259	0.924131	1	1	Transmission_across_Chemical_Synapses	Cacna1a;Slc6a4;Prkar2b;Adcy8;Syn2;Prkcg;
R-MMU-2672351	98	3	3.19735	0.938276	1	1	Stimuli-sensing_channels	Ano3;Trpv5;Clcn2;
R-MMU-156580	92	3	3.0016	0.999468	1	1	Phase_II_-_Conjugation_of_compounds	Gstm5;Mgst3;Gclm;
Table S3f: Results of 904 DEGs (down-regulated in Wt mice Vs ADM mice comparison) in panther enrichment analysis for biological function
Sr. No.	Biological Function	No. of Genes
1	developmental process (GO:0032502)	31	5.9%	3.4%
2	multicellular organismal process (GO:0032501)	36	6.9%	3.9%
3	cellular process (GO:0009987)	272	52.1%	29.8%
4	reproduction (GO:0000003)	8	1.5%	0.9%
5	localization (GO:0051179)	69	13.2%	7.5%
6	reproductive process (GO:0022414)	8	1.5%	0.9%
7	multi-organism process (GO:0051704)	4	0.8%	0.4%
8	biological adhesion (GO:0022610)	11	2.1%	1.2%
9	immune system process (GO:0002376)	22	4.2%	2.4%
10	biological regulation (GO:0065007)	161	30.8%	17.6%
11	growth (GO:0040007)	1	0.2%	0.1%
12	signaling (GO:0023052)	44	8.4%	4.8%
13	metabolic process (GO:0008152)	159	30.5%	17.4%
14	interspecies interaction between organisms (GO:0044419)	11	2.1%	1.2%
15	pigmentation (GO:0043473)	1	0.2%	0.1%
16	response to stimulus (GO:0050896)	67	12.8%	7.3%
17	biological phase (GO:0044848)	2	0.4%	0.2%
18	rhythmic process (GO:0048511)	2	0.4%	0.2%
19	locomotion (GO:0040011)	5	1.0%	0.5%
Table S4a: Results of 487 DEGs (up-regulated in ADM mice+C3G Vs ADM mice comparison) in panther enrichment analysis for molecular function
Sr. No.	Molecular Function	No. of Genes
1	translation regulator activity (GO:0045182)	2	0.5%	0.6%
2	molecular transducer activity (GO:0060089)	5	1.2%	1.6%
3	molecular adaptor activity (GO:0060090)	2	0.5%	0.6%
4	binding (GO:0005488)	137	34.1%	42.5%
5	structural molecule activity (GO:0005198)	3	0.7%	0.9%
6	molecular function regulator (GO:0098772)	34	8.5%	10.6%
7	catalytic activity (GO:0003824)	119	29.6%	37.0%
8	transporter activity (GO:0005215)	20	0.05	0.062
Table S4b: Results of 487 DEGs (up-regulated in ADM mice+C3G Vs ADM mice comparison) in panther enrichment analysis for cellular components
Sr. No.	Cellular Component	No. of Genes
1	cellular anatomical entity (GO:0110165)	240	59.7%	49.5%
2	protein-containing complex (GO:0032991)	54	13.4%	11.1%
3	intracellular (GO:0005622)	191	47.5%	39.4%
Table S4c: Results of 487 DEGs (up-regulated in ADM mice+C3G Vs ADM mice comparison) in panther enrichment analysis for protein class
Sr. No.	Protein Class	No. of Genes
1	extracellular matrix protein (PC00102)	2	0.5%	0.7%
2	cytoskeletal protein (PC00085)	24	6.0%	8.9%
3	transporter (PC00227)	22	5.5%	8.2%
4	scaffold/adaptor protein (PC00226)	10	2.5%	3.7%
5	cell adhesion molecule (PC00069)	1	0.2%	0.4%
6	nucleic acid metabolism protein (PC00171)	17	4.2%	6.3%
7	intercellular signal molecule (PC00207)	3	0.7%	1.1%
8	protein-binding activity modulator (PC00095)	15	3.7%	5.6%
9	calcium-binding protein (PC00060)	2	0.5%	0.7%
10	gene-specific transcriptional regulator (PC00264)	9	2.2%	3.3%
11	defense/immunity protein (PC00090)	7	1.7%	2.6%
12	metabolite interconversion enzyme (PC00262)	51	12.7%	19.0%
13	protein modifying enzyme (PC00260)	51	12.7%	19.0%
14	chromatin/chromatin-binding	or -regulatory protein (PC00077)	33	8.2%	0.123
15	transfer/carrier protein (PC00219)	6	0.015	2.2%
16	membrane traffic protein (PC00150)	3	0.7%	1.1%
17	chaperone (PC00072)	3	0.7%	1.1%
18	cell junction protein (PC00070)	1	0.2%	0.4%
19	structural protein (PC00211)	1	0.2%	0.4%
20	transmembrane signal receptor (PC00197)	8	2.0%	3.0%
Table S4d: Results of 487 DEGs (up-regulated in ADM mice+C3G Vs ADM mice comparison) in panther enrichment analysis for pathways
Sr. No.	Pathways	No. of Genes
1	Beta2 adrenergic receptor signaling pathway (P04378)	1	0.002	0.009
2	Metabotropic glutamate receptor group III pathway (P00039)	1	0.002	0.009
3	Beta1 adrenergic receptor signaling pathway (P04377)	1	0.002	0.009
4	De novo pyrimidine deoxyribonucleotide biosynthesis (P02739)	2	0.005	0.018
5	Apoptosis signaling pathway (P00006)	1	0.002	0.009
6	De novo purine biosynthesis (P02738)	1	0.002	0.009
7	Angiogenesis (P00005)	1	0.002	0.009
8	Alzheimer disease-presenilin pathway (P00004)	3	0.007	0.028
9	5HT1 type receptor mediated signaling pathway (P04373)	1	0.002	0.009
10	Integrin signalling pathway (P00034)	2	0.005	0.018
11	5-Hydroxytryptamine degredation (P04372)	2	0.005	0.018
12	Adrenaline and noradrenaline biosynthesis (P00001)	1	0.002	0.009
13	Inflammation mediated by chemokine and cytokine signaling pathway (P00031)	6	0.015	0.055
14	Asparagine and aspartate biosynthesis (P02730)	1	0.002	0.009
15	Ubiquitin proteasome pathway (P00060)	3	0.007	0.028
16	Nicotine pharmacodynamics pathway (P06587)	2	0.005	0.018
17	GABA-B receptor II signaling (P05731)	2	0.005	0.018
18	Huntington disease (P00029)	5	0.012	0.046
19	Endogenous cannabinoid signaling (P05730)	1	0.002	0.009
20	p53 pathway (P00059)	9	0.022	0.083
21	p53 pathway feedback loops 2 (P04398)	2	0.005	0.018
22	Heterotrimeric G-protein signaling pathway-Gq alpha and Go alpha mediated pathway (P00027)	2	0.005	0.018
23	Pyridoxal-5-phosphate biosynthesis (P02759)	1	0.002	0.009
24	Heterotrimeric G-protein signaling pathway-Gi alpha and Gs alpha mediated pathway (P00026)	4	0.01	0.037
25	Wnt signaling pathway (P00057)	2	0.005	0.018
26	Ornithine degradation (P02758)	1	0.002	0.009
27	Hedgehog signaling pathway (P00025)	2	0.005	0.018
28	Glycolysis (P00024)	1	0.002	0.009
29	Transcription regulation by bZIP transcription factor (P00055)	1	0.002	0.009
30	Vitamin B6 metabolism (P02787)	1	0.002	0.009
31	FAS signaling pathway (P00020)	1	0.002	0.009
32	Plasminogen activating cascade (P00050)	2	0.005	0.018
33	Endothelin signaling pathway (P00019)	1	0.002	0.009
34	p38 MAPK pathway (P05918)	1	0.002	0.009
35	Parkinson disease (P00049)	4	0.01	0.037
36	DNA replication (P00017)	3	0.007	0.028
37	PI3 kinase pathway (P00048)	1	0.002	0.009
38	Cytoskeletal regulation by Rho GTPase (P00016)	4	0.01	0.037
39	PDGF signaling pathway (P00047)	1	0.002	0.009
40	Histamine H2 receptor mediated signaling pathway (P04386)	1	0.002	0.009
41	Oxidative stress response (P00046)	1	0.002	0.009
42	Heme biosynthesis (P02746)	6	0.015	0.055
43	Cell cycle (P00013)	3	0.007	0.028
44	Nicotinic acetylcholine receptor signaling pathway (P00044)	1	0.002	0.009
45	Enkephalin release (P05913)	1	0.002	0.009
46	Muscarinic acetylcholine receptor 2 and 4 signaling pathway (P00043)	3	0.007	0.028
47	Blood coagulation (P00011)	1	0.002	0.009
48	Dopamine receptor mediated signaling pathway (P05912)	2	0.005	0.018
49	Muscarinic acetylcholine receptor 1 and 3 signaling pathway (P00042)	1	0.002	0.009
50	Angiotensin II-stimulated signaling through G proteins and beta-arrestin (P05911)	1	0.002	0.009
51	Tetrahydrofolate biosynthesis (P02742)	1	0.002	0.009
52	Metabotropic glutamate receptor group I pathway (P00041)	1	0.002	0.009
53	CCKR signaling map (P06959)	3	0.007	0.028
54	Metabotropic glutamate receptor group II pathway (P00040)	1	0.002	0.009
55	Pyridoxal phosphate salvage pathway (P02770)	1	0.002	0.009
Table S4e: Results of 487 DEGs (up-regulated in ADM mice+C3G Vs ADM mice comparison) Reactome pathway analysis
TermID	TermGeneNum	ObservedGeneNum	ExpectedGeneNum	RichFactor	rawP	adjP	TermName	GeneList
R-MMU-1640170	597	85	17.0941	4.97247	7.20929e-38	2.42953e-35	Cell_Cycle	Sgo2a;H2ac7;H2ac8;H3c11;H4c8;Cdca5;Bub1b;Cdk1;Hmmr;Ninl;Cdc25c;Tpx2;H2ax;Aurkb;Gtse1;Oip5;H2bc8;Tubb4b;Lig1;H3c7;Spc24;Gins1;Ncaph;Clspn;Ube2c;Ccna2;Cdc25b;Cenpn;Mis18bp1;H2ac15;H2bc6;H2bc7;H2bu2;Birc5;H4c1;Cenpk;Cdc45;Ccnb1;H3c15;Ncapg;Espl1;H2bc13;H3c10;Aurka;Kif18a;Kntc1;H3c4;Sgo1;Ccne1;Chek1;E2f1;Esco2;Kif23;Ska1;Lmna;Pif1;E2f2;H2bc12;Fzr1;Kif2c;Cenpi;Fbxo5;Cdca8;H2bc11;Blm;Prkar2b;Tuba4a;H3c…
R-MMU-69278	515	79	14.7462	5.35732	2.39544e-37	4.03631e-35	Cell_Cycle,_Mitotic	H2bc11;Fbxo5;Cdca8;Kif2c;Cenpi;Fzr1;H2bc12;Lmna;E2f2;Ska1;Esco2;Kif23;E2f1;Ccnb2;Nek2;Cdc6;Cep76;Cdc20;Cenpe;H2ac4;Ccne2;Mcm2;Nuf2;H4c4;H2bc9;Plk1;Bub1;Cenpf;Tuba4a;H3c8;H4c11;Optn;Prkar2b;Lig1;Tubb4b;H2bc8;Spc24;H3c7;Aurkb;Gtse1;Cdc25c;Ninl;Hmmr;H2ax;Tpx2;Bub1b;Cdk1;Cdca5;H4c8;H3c11;H2ac8;Sgo2a;H2ac7;Ccne1;Sgo1;H2bc13;Kntc1;H3c4;H3c10;Aurka;Kif18a;H3c15;Espl1;Ncapg;H4c1;Ccnb1;Cenpk;Cdc45;H2bu2;H…
R-MMU-68886	399	60	11.4247	5.25178	1.9922e-27	2.2379e-25	M_Phase	Spc24;H3c7;H2bc11;Cdca8;H2bc8;Tubb4b;Fbxo5;Cenpi;Kif2c;Aurkb;H2ax;H2bc12;Ninl;Cdk1;Bub1b;Lmna;Cdca5;H4c8;Ska1;H3c11;Kif23;H2ac8;H2ac7;Sgo2a;Sgo1;Nek2;Cep76;Ccnb2;Cdc20;H3c4;Kntc1;Kif18a;H3c10;H2bc13;Espl1;Cenpe;H2ac4;Ncapg;H3c15;Ccnb1;Cenpk;H4c1;Birc5;Nuf2;H2bu2;H2bc7;H2bc6;H2ac15;Plk1;H2bc9;H4c4;H4c11;Cenpn;Bub1;Cenpf;H3c8;Tuba4a;Ube2c;Prkar2b;Ncaph;
R-MMU-69620	281	51	7.82158	6.52042	3.4876e-27	2.9383e-25	Cell_Cycle_Checkpoints	H3c11;Ska1;H4c8;Sgo2a;Chek1;Kif2c;Aurkb;Gtse1;Cenpi;Cdca8;H2bc8;H2bc11;Spc24;Blm;Bub1b;Cdk1;Cdc25c;H2bc12;H2ax;Plk1;H2bc9;H4c4;H2bc7;H2bc6;Mcm2;H2bu2;Ccne2;Birc5;Nuf2;Clspn;Ube2c;Ccna2;Cenpf;H3c8;Bub1;H4c11;Cenpn;H2bc13;Kntc1;Kif18a;H3c10;Cdc20;Ccnb2;Sgo1;Cdc6;Ccne1;H4c1;Cdc45;Cenpk;Ccnb1;Cenpe;
R-MMU-2299718	77	26	0.360141	72.1939	1.7979e-21	1.21178e-19	Condensation_of_Prophase_Chromosomes	H3c8;H3c15;H2ac4;H2ac8;H2bc12;H2ax;H4c11;H4c1;H2ac7;Cdk1;Ccnb1;H2bc8;H2bc7;H2bc6;H2bu2;H2bc11;H4c8;H3c7;H2bc13;H4c4;H3c11;Plk1;H2bc9;H3c4;H3c10;H2ac15;
R-MMU-2559586	89	26	2.4773	10.4953	1.17708e-19	6.61126e-18	DNA_Damage/Telomere_Stress_Induced_Senescence	H2ac7;H4c1;H2ac4;H2ac8;H2bc12;H2ax;H4c11;Ccna2;H3c8;H2ac15;H3c10;H1f4;H1f3;H2bc13;H4c4;H3c11;H2bc9;H4c8;Ccne1;H2bc8;H2bc7;H2bc6;H1f5;H2bu2;Ccne2;H2bc11;
R-MMU-73886	130	29	2.74356	10.5702	2.99838e-18	1.44351e-16	Chromosome_Maintenance	H2ac15;H4c4;H3c11;H2bc9;Mis18bp1;H4c8;H2bu2;H2bc6;H2bc7;H2ac7;Cenpn;H4c11;H2ac8;H3c8;Ccna2;Cenpi;Oip5;H3c10;H2bc13;Blm;H2bc11;Lig1;H2bc8;Pif1;Cenpk;H4c1;H2ax;H2bc12;H2ac4;
R-MMU-8936459	83	24	1.53388	15.6466	4.16754e-18	1.75558e-16	RUNX1_regulates_genes_involved_in_megakaryocyte_differentiation_and_platelet_function	H3c7;H4c8;H2bc11;H2bu2;H2bc7;H2bc6;H2bc8;H3c10;H2ac15;H3c4;H2bc9;H4c4;H3c11;Gata1;H2bc13;H4c11;H2ax;H2bc12;H2ac8;H2ac4;H3c15;H3c8;H2ac7;H4c1;
R-MMU-212300	79	23	2.18093	10.546	1.80212e-17	6.74794e-16	PRC2_methylates_histones_and_DNA	H2bc12;H2ac4;H2ac8;H2ax;H4c11;H3c8;H3c15;H2ac7;H4c1;H3c7;H4c8;H2bc7;H2bc6;H2bc8;H2bu2;H2bc11;H2ac15;H3c10;H3c4;H4c4;H3c11;H2bc9;H2bc13;
R-MMU-110330	63	21	1.8039	11.6414	2.06418e-17	6.95628e-16	Recognition_and_association_of_DNA_glycosylase_with_site_containing_an_affected_purine	H3c8;H2bc6;H2bc7;H2bc8;H2bc11;H2bu2;H2bc12;H2ac8;Neil3;H4c8;H2ac4;H4c11;H2ax;H2bc9;H4c4;H3c11;H4c1;H2bc13;H2ac15;H3c10;H2ac7;
R-MMU-3214815	89	24	2.4976	9.60921	2.51321e-17	7.69956e-16	HDACs_deacetylate_histones	H2bc11;H2bc14;H2bu2;H2bc7;H2bc6;H2bc8;H3c7;H4c8;H2bc9;H3c11;H4c4;H2bc13;H2ac15;H3c10;H3c4;H3c15;H3c8;H4c11;H2bc12;H2ac8;H2ac4;H4c1;H2aw;H2ac7;
R-MMU-110331	65	21	1.80185	11.6547	4.31015e-17	1.11732e-15	Cleavage_of_the_damaged_purine	H3c8;H2ax;H4c11;H2bc12;H2ac4;H2ac8;Neil3;H4c1;H2ac7;H2bu2;H2bc11;H2bc6;H2bc7;H2bc8;H4c8;H3c11;H4c4;H2bc9;H2bc13;H2ac15;H3c10;
R-MMU-73927	65	21	1.80926	11.6069	4.31015e-17	1.11732e-15	Depurination	H2ac15;H3c10;H2bc13;H3c11;H4c4;H2bc9;H4c8;H2bu2;H2bc11;H2bc8;H2bc7;H2bc6;H2ac7;H4c1;H2ax;H4c11;H2ac4;Neil3;H2ac8;H2bc12;H3c8;
R-MMU-68875	135	28	3.8655	7.24356	9.15278e-17	2.20321e-15	Mitotic_Prophase	H2ac7;H2ac8;H4c11;H3c8;H2ac15;H3c11;H4c4;H2bc9;Plk1;H4c8;H2bc6;H2bc7;H2bu2;Cdk1;Ccnb1;Lmna;H4c1;H2ac4;H2bc12;H2ax;H3c15;H3c4;H3c10;H2bc13;H3c7;H2bc8;Ccnb2;H2bc11;
R-MMU-606279	78	22	0.418207	52.6055	1.97116e-16	4.01999e-15	Deposition_of_new_CENPA-containing_nucleosomes_at_the_centromere	H2bc6;H2bc7;H2bc8;H2bc11;H2bu2;H4c8;Mis18bp1;H2bc9;H4c4;H2bc13;H2ac15;Cenpi;Oip5;H2bc12;H2ac8;H2ac4;Cenpn;H4c11;H2ax;H4c1;Cenpk;H2ac7;
R-MMU-774815	78	22	1.69062	13.013	1.97116e-16	4.01999e-15	Nucleosome_assembly	H4c1;Cenpk;H2ac7;H2bc12;H2ac8;H2ac4;Cenpn;H4c11;H2ax;Mis18bp1;H2bc9;H4c4;H2bc13;H2ac15;Cenpi;Oip5;H2bc7;H2bc6;H2bc8;H2bc11;H2bu2;H4c8;
R-MMU-2500257	117	26	3.36345	7.73016	2.02789e-16	4.01999e-15	Resolution_of_Sister_Chromatid_Cohesion	Sgo2a;Bub1b;Ccnb1;Cdk1;Cenpk;Bub1;Tuba4a;Cenpf;Cenpn;Cenpe;Aurkb;Plk1;Kif2c;Cdc20;Cenpi;Kif18a;Kntc1;Ccnb2;Ska1;Tubb4b;Cdca8;Cdca5;Nuf2;Birc5;Spc24;Sgo1;
R-MMU-68877	188	32	5.14716	6.21702	2.28564e-16	4.27923e-15	Mitotic_Prometaphase	Ninl;Cenpe;Ncapg;Bub1b;Ccnb1;Cenpk;Cdk1;Ccnb2;Cdca8;Tubb4b;Sgo1;Spc24;Nek2;Cep76;Kif2c;Aurkb;Cenpi;Cdc20;Kntc1;Kif18a;Bub1;Cenpf;Tuba4a;Cenpn;Sgo2a;Prkar2b;Ncaph;Ska1;Birc5;Nuf2;Cdca5;Plk1;
R-MMU-73929	72	21	2.0616	10.1863	4.5772e-16	8.11851e-15	Base-Excision_Repair,_AP_Site_Formation	H2bu2;H2bc11;H2bc7;H2bc6;H2bc8;H4c8;H4c4;H3c11;H2bc9;H2bc13;H3c10;H2ac15;H3c8;H2ax;H4c11;H2bc12;H2ac4;Neil3;H2ac8;H4c1;H2ac7;
R-MMU-9670095	65	20	1.86858	10.7033	7.31097e-16	1.2319e-14	Inhibition_of_DNA_recombination_at_telomere	H2ac15;H3c10;H2bc13;H3c11;H4c4;H2bc9;H4c8;H2bc8;H2bc6;H2bc7;H2bu2;H2bc11;H2ac7;H4c1;H2ac4;H2ac8;H2bc12;H2ax;H4c11;H3c8;
R-MMU-157579	104	24	2.63381	9.11227	1.22882e-15	1.97197e-14	Telomere_Maintenance	H2bc7;H2bc6;H2bc8;H2bc11;H2bu2;Lig1;H4c8;Blm;H2bc9;H3c11;H4c4;H2bc13;H2ac15;H3c10;H3c8;Ccna2;H2bc12;H2ac8;H2ac4;H4c11;H2ax;H4c1;Pif1;H2ac7;
R-MMU-2559583	153	28	4.43326	6.31589	2.809e-15	4.30288e-14	Cellular_Senescence	H2ac8;H4c11;H3c8;Ccna2;Ube2c;H2ac7;H4c8;H2bc6;H2bc7;Ccne2;H2bu2;H2ac15;H1f3;H4c4;H3c11;H2bc9;H2bc12;Fzr1;H2ac4;H2ax;H4c1;Ccne1;H1f5;H2bc8;H2bc11;H3c10;H1f4;H2bc13;
R-MMU-3214847	72	20	2.06982	9.6627	6.71677e-15	9.84153e-14	HATs_acetylate_histones	H3c8;H3c15;H2bc12;Brpf3;H4c11;H4c1;H2bc6;H2bc7;H2bc8;H2bu2;H2bc14;H2bc11;H3c7;H4c8;H4c4;H3c11;H2bc9;H2bc13;H3c10;H3c4;
R-MMU-73884	93	22	2.6629	8.26166	1.14313e-14	1.60515e-13	Base_Excision_Repair	H3c8;H2bc12;H2ac8;Neil3;H2ac4;H4c11;H2ax;H4c1;H2ac7;H2bc6;H2bc7;H2bc8;H2bc11;H2bu2;Lig1;H4c8;H2bc9;H3c11;H4c4;H2bc13;H3c10;H2ac15;
R-MMU-212165	109	23	3.13347	7.34011	3.94132e-14	5.3129e-13	Epigenetic_regulation_of_gene_expression	H3c8;H3c15;H2ac8;H2ac4;H2bc12;H4c11;H2ax;H4c1;H2ac7;H2bc8;H2bc6;H2bc7;H2bc11;H2bu2;H4c8;H3c7;H2bc13;H2bc9;H3c11;H4c4;H3c4;H2ac15;H3c10;
R-MMU-69473	90	21	2.6078	8.05276	6.32219e-14	8.19454e-13	G2/M_DNA_damage_checkpoint	H3c10;H4c4;H3c11;H2bc9;H2bc13;H4c8;Blm;H2bc6;H2bc7;H2bc8;H2bu2;H2bc11;Cdk1;Ccnb1;Chek1;H4c1;H2bc12;H2ax;H4c11;H3c8;Cdc25c;
R-MMU-69481	162	27	4.3614	6.19068	9.96006e-14	1.24316e-12	G2/M_Checkpoints	H3c11;H4c4;H2bc9;H4c8;H2bc6;H2bc7;H2bu2;Mcm2;Chek1;Clspn;H4c11;H3c8;H3c10;Gtse1;H2bc13;Cdc6;Blm;H2bc8;Ccnb2;H2bc11;Cdk1;Cdc45;Ccnb1;H4c1;H2bc12;H2ax;Cdc25c;
R-MMU-9648025	106	22	2.86585	7.67662	2.07804e-13	2.50107e-12	EML4_and_NUDC_in_mitotic_spindle_formation	Tubb4b;Cdca8;Ska1;Nuf2;Birc5;Spc24;Sgo1;Kif2c;Aurkb;Plk1;Cdc20;Cenpi;Kntc1;Kif18a;Bub1;Cenpf;Tuba4a;Cenpe;Cenpn;Bub1b;Sgo2a;Cenpk;
R-MMU-5693607	87	20	1.87577	10.6623	3.46805e-13	4.03011e-12	Processing_of_DNA_double-strand_break_ends	H2bc9;H3c11;H4c4;H2bc13;H3c10;H2bc11;H2bu2;H2bc7;H2bc6;H2bc8;Blm;H4c8;H4c1;Clspn;Chek1;H3c8;Ccna2;H4c11;H2ax;H2bc12;
R-MMU-141424	90	20	1.65298	12.0994	6.88672e-13	7.48654e-12	Amplification_of_signal_from_the_kinetochores	Cenpk;Bub1b;Sgo2a;Cenpe;Cenpn;Bub1;Cenpf;Cdc20;Cenpi;Kntc1;Kif18a;Kif2c;Aurkb;Plk1;Nuf2;Birc5;Spc24;Sgo1;Cdca8;Ska1;
R-MMU-141444	90	20	2.58727	7.73016	6.88672e-13	7.48654e-12	Amplification__of_signal_from_unattached__kinetochores_via_a_MAD2__inhibitory_signal	Plk1;Aurkb;Kif2c;Kif18a;Kntc1;Cenpi;Cdc20;Ska1;Cdca8;Spc24;Sgo1;Nuf2;Birc5;Sgo2a;Bub1b;Cenpk;Cenpf;Bub1;Cenpn;Cenpe;
R-MMU-2555396	220	30	6.37463	4.70616	9.28295e-13	9.7761e-12	Mitotic_Metaphase_and_Anaphase	Ska1;Cdca5;Nuf2;Birc5;Plk1;Bub1;Tuba4a;Cenpf;Cenpn;Sgo2a;Ube2c;Ccnb2;Fbxo5;Tubb4b;Cdca8;Spc24;Sgo1;Aurkb;Kif2c;Cdc20;Cenpi;Kif18a;Kntc1;Cenpe;Espl1;Bub1b;Lmna;Ccnb1;Cenpk;Cdk1;
R-MMU-69618	107	21	2.62434	8.002	2.37504e-12	2.37668e-11	Mitotic_Spindle_Checkpoint	Kntc1;Kif18a;Cenpi;Cdc20;Kif2c;Plk1;Aurkb;Sgo1;Spc24;Birc5;Nuf2;Cdca8;Ska1;Cenpk;Ube2c;Bub1b;Sgo2a;Cenpe;Cenpn;Cenpf;Bub1;
R-MMU-5663220	131	23	3.30265	6.96411	2.39784e-12	2.37668e-11	RHO_GTPases_Activate_Formins	Cenpk;Bub1b;Cenpe;Kntc1;Kif18a;Cdc20;Cenpi;Kif2c;Diaph3;Aurkb;Spc24;Sgo1;Tubb4b;Cdca8;Sgo2a;Cenpn;Cenpf;Tuba4a;Bub1;Plk1;Nuf2;Birc5;Ska1;
R-MMU-68882	219	29	4.59685	6.30867	4.84401e-12	4.66409e-11	Mitotic_Anaphase	Sgo2a;Ube2c;Bub1;Cenpf;Tuba4a;Cenpn;Plk1;Ska1;Birc5;Nuf2;Cdca5;Bub1b;Lmna;Ccnb1;Cdk1;Cenpk;Cenpe;Espl1;Kif2c;Aurkb;Cenpi;Cdc20;Kntc1;Kif18a;Ccnb2;Cdca8;Tubb4b;Sgo1;Spc24;
R-MMU-195258	239	30	6.62526	4.52813	8.14737e-12	7.62684e-11	RHO_GTPase_Effectors	Plk1;Ska1;S100a9;Birc5;Nuf2;Sgo2a;Tuba4a;Cenpf;Bub1;Cenpn;Aurkb;Diaph3;Kif2c;Kif18a;Kntc1;Cenpi;Cdc20;Cdca8;Tubb4b;S100a8;Sgo1;Spc24;Iqgap3;Prc1;Kif14;Bub1b;Cenpk;Cit;Cdc25c;Cenpe;
R-MMU-5693571	61	16	1.76751	9.05228	9.75191e-12	8.88215e-11	Nonhomologous_End-Joining_(NHEJ)	H3c8;H2bc6;H2bc7;H2bc8;H2bc11;H2bu2;H2bc12;H4c8;H4c11;H2ax;H2bc9;H3c11;H4c4;H4c1;H2bc13;H3c10;
R-MMU-73894	307	34	8.33516	4.07911	1.06439e-11	9.43946e-11	DNA_Repair	H2ac4;Neil3;H4c1;Pclaf;H3c10;H2bc13;H4c11;H3c8;Ccna2;Clspn;H2bu2;H2bc7;H2bc6;Rad51ap1;H2ac15;H4c4;H2bc9;H2ax;H2bc12;Blm;Fanci;H2bc11;Lig1;H2bc8;Rad23a;H2ac8;Chek1;Ube2l6;H2ac7;Isg15;Dtl;H4c8;Fancd2;H3c11;
R-MMU-983231	120	21	2.84736	7.37524	2.40203e-11	2.02371e-10	Factors_involved_in_megakaryocyte_development_and_platelet_production	Kif11;Prkar2b;Kif4;Cenpe;Kif22;H3c15;Tuba4a;H3c8;H3c4;Kif18a;H3c10;Gata1;Kifc1;Kif2c;H3c11;Kif15;Kif23;Nfe2;Kif18b;H3c7;Tubb4b;
R-MMU-5693567	120	21	3.436	6.11175	2.40203e-11	2.02371e-10	HDR_through_Homologous_Recombination_(HRR)_or_Single_Strand_Annealing_(SSA)	Blm;H4c8;H2bu2;H2bc11;H2bc8;H2bc7;H2bc6;H3c10;Rad51ap1;H2bc13;H3c11;H4c4;H2bc9;H2ax;H4c11;H2bc12;Ccna2;H3c8;Chek1;Clspn;H4c1;
R-MMU-5693538	123	21	3.0308	6.92886	3.91722e-11	3.21976e-10	Homology_Directed_Repair	H3c8;Ccna2;H4c11;H2ax;H2bc12;H4c1;Clspn;Chek1;H2bc11;H2bu2;H2bc7;H2bc6;H2bc8;Blm;H4c8;H2bc9;H4c4;H3c11;H2bc13;H3c10;Rad51ap1;
R-MMU-9018519	90	18	2.577	6.98486	6.6755e-11	5.35629e-10	Estrogen-dependent_gene_expression	H3c8;H3c15;H2bc12;H4c11;H4c1;H2bc8;H2bc7;H2bc6;H2bu2;H2bc11;H4c8;H3c7;H2bc13;H3c11;H4c4;H2bc9;H3c4;H3c10;
R-MMU-2467813	182	25	5.10746	4.8948	7.0352e-11	5.51363e-10	Separation_of_Sister_Chromatids	Plk1;Nuf2;Birc5;Cdca5;Ska1;Ube2c;Sgo2a;Cenpn;Bub1;Cenpf;Tuba4a;Cenpi;Cdc20;Kntc1;Kif18a;Kif2c;Aurkb;Spc24;Sgo1;Tubb4b;Cdca8;Cenpk;Bub1b;Espl1;Cenpe;
R-MMU-5693565	73	16	2.09023	7.65464	1.85676e-10	1.42211e-09	Recruitment_and_ATM-mediated_phosphorylation_of_repair_and_signaling_proteins_at_DNA_double_strand_breaks	H3c10;H2bc13;H3c11;H4c4;H2bc9;H4c8;H2bc8;H2bc7;H2bc6;H2bu2;H2bc11;H4c1;H2bc12;H2ax;H4c11;H3c8;
R-MMU-5693606	74	16	0.98768	16.1996	2.30829e-10	1.72865e-09	DNA_Double_Strand_Break_Response	H3c10;H3c11;H4c4;H2bc9;H2bc13;H4c8;H2bu2;H2bc11;H2bc7;H2bc6;H2bc8;H4c1;H2ax;H4c11;H2bc12;H3c8;
R-MMU-194315	366	35	7.13963	4.90221	3.23468e-10	2.36976e-09	Signaling_by_Rho_GTPases	Ska1;Sgo2a;Cenpi;Ect2;Aurkb;Kif2c;S100a8;Spc24;Prc1;Cdca8;Tubb4b;Arhgap11a;Bub1b;Cdc25c;Depdc1b;Plk1;Birc5;Nuf2;S100a9;Itsn1;Cenpn;Tuba4a;Cenpf;Bub1;Kif18a;Kntc1;Cdc20;Diaph3;Sgo1;Iqgap3;Ccne1;Cenpk;Kif14;Cenpe;Cit;
R-MMU-189451	13	8	0.120123	66.5984	5.05813e-10	3.62679e-09	Heme_biosynthesis	Alas2;Uros;Alad;Urod;Abcg2;Cpox;Hmbs;Ppox;
R-MMU-176417	6	6	0.1718	34.9243	5.58602e-10	3.92185e-09	Phosphorylation_of_Emi1	Fbxo5;Fzr1;Cdk1;Ccnb1;Cdc20;Plk1;
R-MMU-3247509	202	25	5.62263	4.44632	6.80487e-10	4.58648e-09	Chromatin_modifying_enzymes	H3c15;H2ac4;H2bc12;Brpf3;H4c1;H2bc8;H2bc11;H2bc14;H3c7;H2bc13;H3c4;H3c10;H3c8;H2ac8;H4c11;H2ac7;H2aw;H2bc6;H2bc7;H2bu2;H4c8;H2bc9;H3c11;H4c4;H2ac15;
R-MMU-4839726	202	25	5.78394	4.32231	6.80487e-10	4.58648e-09	Chromatin_organization	H2aw;H2ac7;H4c11;H2ac8;H3c8;H2ac15;H3c11;H4c4;H2bc9;H4c8;H2bu2;H2bc6;H2bc7;H4c1;Brpf3;H2ac4;H2bc12;H3c15;H3c4;H3c10;H2bc13;H3c7;H2bc14;H2bc11;H2bc8;
R-MMU-8878171	204	25	4.16564	6.00148	8.39957e-10	5.5503e-09	Transcriptional_regulation_by_RUNX1	H2bu2;H2bc6;H2bc7;H4c8;H4c4;H3c11;H2bc9;H2ac15;H3c8;H4c11;H2ac8;H2ac7;H2bc11;H2bc8;H3c7;H2bc13;Gata1;Tal1;H3c10;H3c4;H3c15;H2ax;H2bc12;H2ac4;H4c1;
R-MMU-3214858	71	15	1.45791	10.2887	1.21101e-09	7.8483e-09	RMTs_methylate_histone_arginines	H2ac7;H2aw;H4c1;H2ac8;H2ac4;H4c11;H3c8;H3c15;H3c4;H3c10;H2ac15;H4c4;H3c11;H4c8;H3c7;
R-MMU-5693532	149	21	2.29466	9.15168	1.56177e-09	9.93053e-09	DNA_Double-Strand_Break_Repair	Ccna2;H3c8;H4c11;Clspn;Chek1;H2bu2;H2bc6;H2bc7;H4c8;H2bc9;H3c11;H4c4;Rad51ap1;H2ax;H2bc12;H4c1;H2bc11;H2bc8;Blm;H2bc13;H3c10;
R-MMU-983189	52	12	1.49487	8.02747	1.99158e-08	1.24289e-07	Kinesins	Cenpe;Kif22;Kif18b;Tubb4b;Tuba4a;Kif11;Kif18a;Kifc1;Kif2c;Kif4;Kif15;Kif23;
R-MMU-6791312	34	10	0.752453	13.2899	2.48454e-08	1.52235e-07	TP53_Regulates_Transcription_of_Cell_Cycle_Genes	Ccnb1;Cdk1;Aurka;Gadd45a;E2f7;Cdc25c;E2f8;Ccne2;Ccna2;Ccne1;
R-MMU-189445	26	9	0.634725	14.1794	2.53849e-08	1.52763e-07	Metabolism_of_porphyrins	Uros;Alas2;Blvrb;Alad;Urod;Hmbs;Cpox;Abcg2;Ppox;
R-MMU-176408	29	9	0.830367	10.8386	7.539e-08	4.45727e-07	Regulation_of_APC/C_activators_between_G1/S_and_early_anaphase	Ccna2;Fbxo5;Bub1b;Plk1;Cdk1;Fzr1;Ube2c;Cdc20;Ccnb1;
R-MMU-2262752	418	33	10.5382	3.13146	1.25566e-07	7.29579e-07	Cellular_responses_to_stress	H2bc7;H2bc6;H2bu2;Ccne2;H2ac15;H1f3;H2bc9;H4c4;H4c11;H3c8;Tuba4a;Ccna2;Ube2c;Ccne1;H3c10;H1f4;H2bc13;H2ac4;Gpx1;H4c1;H4c8;H3c11;Prdx2;H2ac8;H2ac7;H1f5;H2bc8;Tubb4b;H2bc11;Txnrd2;H2bc12;Fzr1;H2ax;
R-MMU-8953897	420	33	8.72006	3.78438	1.40521e-07	8.02634e-07	Cellular_responses_to_external_stimuli	H2bc7;H2bc6;H2bu2;Ccne2;H1f3;H2bc9;H4c4;H2ac15;Ccna2;H3c8;Tuba4a;H4c11;Ube2c;Ccne1;H1f4;H2bc13;H3c10;Gpx1;H2ac4;H4c1;H4c8;H3c11;H2ac8;Prdx2;H2ac7;Tubb4b;H2bc8;H1f5;H2bc11;Txnrd2;Fzr1;H2bc12;H2ax;
R-MMU-8939211	159	19	0.598563	31.7427	1.4679e-07	8.24468e-07	ESR-mediated_signaling	H4c4;H3c11;H2bc9;H4c8;H2bu2;H2bc6;H2bc7;Mmp9;H4c11;H3c8;H3c10;H3c4;H2bc13;H3c7;H2bc11;H2bc8;H4c1;H2bc12;H3c15;
R-MMU-3214842	45	10	1.2885	7.76096	4.56284e-07	2.52078e-06	HDMs_demethylate_histones	H3c4;H3c10;H4c4;H4c1;H3c11;H4c8;H3c7;H4c11;H3c8;H3c15;
R-MMU-6799990	4	4	0.065252	61.3008	6.88842e-07	3.74419e-06	Metal_sequestration_by_antimicrobial_proteins	S100a8;Lcn2;Ltf;S100a9;
R-MMU-453274	178	19	4.28451	4.43458	8.66433e-07	4.63473e-06	Mitotic_G2-G2/M_phases	Plk1;Optn;Tuba4a;Ccna2;E2f1;Cdc25b;Prkar2b;Cep76;Nek2;Tubb4b;Ccnb2;Aurka;Gtse1;Tpx2;Hmmr;Ninl;Cdc25c;Cdk1;Ccnb1;
R-MMU-69273	22	7	0.629934	11.1123	1.85561e-06	9.77092e-06	Cyclin_A/B1/B2_associated_events_during_G2/M_transition	Cdk1;Ccnb1;Ccna2;Plk1;Cdc25b;Ccnb2;Cdc25c;
R-MMU-9006931	208	20	5.95574	3.35811	2.32687e-06	1.20639e-05	Signaling_by_Nuclear_Receptors	H2bc11;H2bc8;H3c7;H2bc13;H3c10;H3c4;H3c15;H2bc12;H4c1;H2bu2;H2bc7;H2bc6;H4c8;H2bc9;H4c4;H3c11;H3c8;Mmp9;H4c11;Aldh1a1;
R-MMU-69275	176	18	5.05955	3.55763	3.15228e-06	1.60958e-05	G2/M_Transition	Optn;Ccna2;Tuba4a;Cdc25b;Prkar2b;Plk1;Tpx2;Hmmr;Cdc25c;Ninl;Cdk1;Ccnb1;Nek2;Cep76;Tubb4b;Ccnb2;Aurka;Gtse1;
R-MMU-2980767	5	4	0.121492	32.924	3.3656e-06	1.69284e-05	Activation_of_NIMA_Kinases_NEK9,_NEK6,_NEK7	Ccnb1;Plk1;Ccnb2;Cdk1;
R-MMU-6804116	10	5	0.286334	17.4621	4.39411e-06	2.17767e-05	TP53_Regulates_Transcription_of_Genes_Involved_in_G1_Cell_Cycle_Arrest	Ccna2;Ccne2;E2f7;Ccne1;E2f8;
R-MMU-2565942	84	12	2.43395	4.93026	4.78306e-06	2.33607e-05	Regulation_of_PLK1_Activity_at_G2/M_Transition	Aurka;Plk1;Nek2;Cep76;Ccnb2;Tubb4b;Ccnb1;Cdk1;Prkar2b;Optn;Ninl;Tuba4a;
R-MMU-453276	85	12	2.13324	5.62524	5.42794e-06	2.54058e-05	Regulation_of_mitotic_cell_cycle	Fbxo5;Nek2;Aurkb;Plk1;Cdc20;Aurka;Ccna2;Fzr1;Bub1b;Ccnb1;Ube2c;Cdk1;
R-MMU-174143	85	12	2.33687	5.13507	5.42794e-06	2.54058e-05	APC/C-mediated_degradation_of_cell_cycle_proteins	Fbxo5;Nek2;Plk1;Aurkb;Cdc20;Aurka;Ccna2;Fzr1;Bub1b;Ccnb1;Ube2c;Cdk1;
R-MMU-8854518	71	11	2.04107	5.38933	5.34984e-06	2.54058e-05	AURKA_Activation_by_TPX2	Cep76;Nek2;Tubb4b;Aurka;Plk1;Tpx2;Ninl;Tuba4a;Hmmr;Cdk1;Prkar2b;
R-MMU-3214841	62	10	1.72576	5.79455	9.96667e-06	4.60105e-05	PKMTs_methylate_histone_lysines	H3c8;H3c15;H4c8;H3c7;H4c11;H4c4;H4c1;H3c11;H3c4;H3c10;
R-MMU-6811434	91	12	2.4084	4.98257	1.11561e-05	5.08056e-05	COPI-dependent_Golgi-to-ER_retrograde_traffic	Kif22;Cenpe;Tuba4a;Kif11;Kif4;Kif18b;Tubb4b;Kif18a;Kif2c;Kifc1;Kif23;Kif15;
R-MMU-109582	504	33	11.9589	2.75944	1.22355e-05	5.49784e-05	Hemostasis	Gp1bb;Arrb1;H3c11;Kif23;Cd177;Ppbp;Kif18b;Bsg;Vwf;Kif2c;Kif15;Tubb4b;Slc7a5;H3c7;Prkar2b;Pf4;Kif11;Tuba4a;H3c8;Kifc1;Slc16a1;Atp2b4;Kif4;H3c15;Cenpe;Brpf3;Kif22;Gata1;P2ry1;H3c4;H3c10;Kif18a;Nfe2;
R-MMU-6804114	7	4	0.185261	21.5912	2.24973e-05	9.97578e-05	TP53_Regulates_Transcription_of_Genes_Involved_in_G2_Cell_Cycle_Arrest	Gadd45a;Aurka;Ccnb1;Cdk1;
R-MMU-1266695	25	6	0.715834	8.38183	6.21467e-05	0.000271993	Interleukin-7_signaling	H3c8;H3c15;H3c11;H3c10;H3c7;H3c4;
R-MMU-2132295	131	13	3.00377	4.3279	0.000103341	0.000446486	MHC_class_II_antigen_presentation	Kif15;Kif2c;Kif18a;Tubb4b;Kif4;Cenpe;Kif22;Ctse;Kif23;Kifc1;Kif18b;Kif11;Tuba4a;
R-MMU-388396	993	11	28.4329	0.386875	0.000114577	0.000488764	GPCR_downstream_signalling	Gpsm2;Itsn1;Prkar2b;Pf4;Ect2;Metap2;Arrb1;Ppbp;P2ry1;Fpr2;Prokr1;
R-MMU-556833	594	4	8.47023	0.472242	0.000187988	0.0007919	Metabolism_of_lipids	Ptdss2;Pcyt1b;Pip5k1b;Gpx1;
R-MMU-69306	123	12	3.5219	3.40725	0.000223837	0.000931273	DNA_Replication	E2f2;Cdc45;Ube2c;Gins1;Fzr1;E2f1;Ccna2;Ccne1;Cdc6;Lig1;Mcm2;Ccne2;
R-MMU-69478	5	3	0.100958	29.7153	0.000230276	0.00094638	G2/M_DNA_replication_checkpoint	Ccnb2;Ccnb1;Cdk1;
R-MMU-8856688	124	12	0.183892	65.2557	0.000241557	0.00098078	Golgi-to-ER_retrograde_transport	Cenpe;Kif22;Tuba4a;Kif11;Kif4;Kif18b;Tubb4b;Kif18a;Kifc1;Kif2c;Kif15;Kif23;
R-MMU-2168880	21	5	0.455168	10.985	0.000273035	0.00109539	Scavenging_of_heme_from_plasma	Hp;Apol11b;Hbb-bt;Apol10a;Apol11a;
R-MMU-212436	830	42	23.1029	1.81795	0.000292165	0.00115835	Generic_Transcription_Pathway	Tal1;H2ac4;Gadd45a;Ccne2;H4c4;H2bc9;H4c11;H3c8;Blm;H2bc11;E2f7;H2bc12;Prdx2;Steap3;Chek1;Ccne1;Aurka;H3c10;H3c4;H2bc13;Gata1;Brpf3;H3c15;E2f8;Ccnb1;H4c1;H2bu2;H2bc7;H2bc6;H2ac15;Ccna2;H3c7;H2bc8;Aurkb;H2ax;Tpx2;Cdc25c;Cdk1;H4c8;H3c11;H2ac8;H2ac7;
R-MMU-176187	34	6	0.934748	6.41884	0.000379208	0.00148596	Activation_of_ATR_in_response_to_replication_stress	Mcm2;Cdc25c;Cdc6;Clspn;Chek1;Cdc45;
R-MMU-372790	1024	13	27.4515	0.473562	0.000465132	0.00180172	Signaling_by_GPCR	P2ry1;Ccrl2;Xk;Itsn1;Metap2;Ect2;Arrb1;Fpr2;Prokr1;Gpsm2;Prkar2b;Pf4;Ppbp;
R-MMU-380284	68	8	1.89277	4.22661	0.000731269	0.00276896	Loss_of_proteins_required_for_interphase_microtubule_organization_from_the_centrosome	Tubb4b;Cep76;Nek2;Plk1;Tuba4a;Ninl;Prkar2b;Cdk1;
R-MMU-380259	68	8	1.94707	4.10874	0.000731269	0.00276896	Loss_of_Nlp_from_mitotic_centrosomes	Plk1;Cep76;Nek2;Tubb4b;Cdk1;Prkar2b;Ninl;Tuba4a;
R-MMU-8866654	53	7	0.767853	9.11633	0.000779128	0.0029174	E3_ubiquitin_ligases_ubiquitinate_target_proteins	H2bc11;H2bc8;H2bc7;H2bc6;H2bc12;H2bc13;H2bc9;
R-MMU-68881	2	2	0.052475	38.1134	0.000836375	0.00309734	Mitotic_Metaphase/Anaphase_Transition	Plk1;Fbxo5;
R-MMU-69242	143	12	4.11088	2.91908	0.000886531	0.0032474	S_Phase	Lig1;Cdc6;Ccne1;Fzr1;Esco2;Mcm2;Ccne2;Cdca5;Gins1;Ube2c;Ccna2;Cdc25b;
R-MMU-8852135	73	8	2.02361	3.95332	0.00117435	0.00425544	Protein_ubiquitination	H2bc12;Ube2c;H2bc8;H2bc7;H2bc6;H2bc11;H2bc13;H2bc9;
R-MMU-1247673	8	3	0.202601	14.8074	0.00120854	0.00428715	Erythrocytes_take_up_oxygen_and_release_carbon_dioxide	Car2;Hbb-bt;Aqp1;
R-MMU-5625900	8	3	0.215378	13.929	0.00120854	0.00428715	RHO_GTPases_activate_CIT	Kif14;Prc1;Cit;
R-MMU-2995383	18	4	0.521561	7.66929	0.00152855	0.00534219	Initiation_of_Nuclear_Envelope_(NE)_Reformation	Cdk1;Ccnb1;Lmna;Ccnb2;
R-MMU-6798695	514	28	14.8935	1.88002	0.00153766	0.00534219	Neutrophil_degranulation	S100a9;Alad;Mmp9;Fpr2;Mettl7a1;Cd177;Tubb4b;S100a8;Mmp25;Elane;Camp;Ltf;Slpi;Hbb-bt;Mmp8;Prg2;Ppbp;Svip;Ms4a3;Ctsg;Fcgr4;Naprt;Hp;Mpo;Fcnb;Abca13;Lcn2;Stom;
R-MMU-380287	77	8	2.21355	3.6141	0.00166455	0.00560952	Centrosome_maturation	Tuba4a;Ninl;Prkar2b;Cdk1;Tubb4b;Nek2;Cep76;Plk1;
R-MMU-380270	77	8	2.23112	3.58564	0.00166455	0.00560952	Recruitment_of_mitotic_centrosome_proteins_and_complexes	Tuba4a;Ninl;Prkar2b;Cdk1;Tubb4b;Cep76;Nek2;Plk1;
R-MMU-176814	77	8	2.23112	3.58564	0.00166455	0.00560952	Activation_of_APC/C_and_APC/C:Cdc20_mediated_degradation_of_mitotic_proteins	Ccna2;Cdk1;Ube2c;Ccnb1;Bub1b;Nek2;Cdc20;Plk1;
R-MMU-176412	20	4	0.524755	7.62261	0.00231241	0.00771567	Phosphorylation_of_the_APC/C	Plk1;Ccnb1;Ube2c;Cdk1;
R-MMU-68689	10	3	0.143737	20.8715	0.00248049	0.00819536	CDC6_association_with_the_ORC:origin_complex	Cdc6;E2f2;E2f1;
R-MMU-2173782	34	5	0.841661	5.94063	0.00274606	0.00898468	Binding_and_Uptake_of_Ligands_by_Scavenger_Receptors	Hp;Apol11a;Hbb-bt;Apol11b;Apol10a;
R-MMU-3700989	281	17	7.75747	2.19144	0.00349462	0.0113239	Transcriptional_Regulation_by_TP53	Ccna2;Ccne2;Brpf3;E2f8;Ccnb1;Gadd45a;Ccne1;Aurka;Prdx2;Steap3;Chek1;Tpx2;Cdc25c;Cdk1;Blm;E2f7;Aurkb;
R-MMU-5689901	36	5	0.969199	5.1589	0.00354962	0.0113926	Metalloprotease_DUBs	H2aw;H2ac7;H2ac15;H2ac8;H2ac4;
R-MMU-380320	88	8	2.51973	3.17494	0.00387246	0.0123115	Recruitment_of_NuMA_to_mitotic_centrosomes	Plk1;Nek2;Cep76;Tubb4b;Cdk1;Prkar2b;Tuba4a;Ninl;
R-MMU-1480926	12	3	0.277892	10.7956	0.00435629	0.0133461	O2/CO2_exchange_in_erythrocytes	Aqp1;Hbb-bt;Car2;
R-MMU-1237044	12	3	0.29295	10.2407	0.00435629	0.0133461	Erythrocytes_take_up_carbon_dioxide_and_release_oxygen	Aqp1;Hbb-bt;Car2;
R-MMU-75035	12	3	0.334018	8.98155	0.00435629	0.0133461	Chk1/Chk2(Cds1)_mediated_inactivation_of_Cyclin_B:Cdk1_complex	Cdc25c;Ccnb1;Cdk1;
R-MMU-140342	12	3	0.3436	8.73108	0.00435629	0.0133461	Apoptosis_induced_DNA_fragmentation	H1f3;H1f4;H1f5;
R-MMU-174048	24	4	0.629706	6.35217	0.00463111	0.0140602	APC/C:Cdc20_mediated_degradation_of_Cyclin_B	Ccnb1;Cdc20;Cdk1;Ube2c;
R-MMU-156711	4	2	0.086699	23.0683	0.00482792	0.0143983	Polo-like_kinase_mediated_events	Cdc25c;Plk1;
R-MMU-69200	4	2	0.114533	17.4622	0.00482792	0.0143983	Phosphorylation_of_proteins_involved_in_G1/S_transition_by_active_Cyclin_E:Cdk2_complexes	Ccne2;Ccne1;
R-MMU-9006934	399	3	9.83162	0.305138	0.00525948	0.0155478	Signaling_by_Receptor_Tyrosine_Kinases	Chek1;Ranbp10;Mmp9;
R-MMU-73857	948	42	27.4689	1.529	0.00531254	0.015568	RNA_Polymerase_II_Transcription	Ccne1;H3c4;Aurka;H3c10;Gata1;H2bc13;Brpf3;E2f8;H3c15;Ccnb1;H4c1;H2bu2;H2bc7;H2bc6;H2ac15;Ccna2;H3c7;H2bc8;Aurkb;H2ax;Tpx2;Cdc25c;Cdk1;H4c8;H3c11;H2ac8;H2ac7;Tal1;H2ac4;Gadd45a;Ccne2;H2bc9;H4c4;H4c11;H3c8;Blm;E2f7;H2bc11;H2bc12;Prdx2;Steap3;Chek1;
R-MMU-6811442	178	12	4.93429	2.43196	0.00553729	0.0160868	Intra-Golgi_and_retrograde_Golgi-to-ER_traffic	Kif11;Tuba4a;Kif23;Kifc1;Kif18b;Kif4;Cenpe;Kif22;Kif18a;Kif15;Kif2c;Tubb4b;
R-MMU-8852276	75	7	1.83094	3.82318	0.0058562	0.0168678	The_role_of_GTSE1_in_G2/M_progression_after_G2_checkpoint	Ccnb1;Cdk1;Tuba4a;Gtse1;Plk1;Ccnb2;Tubb4b;
R-MMU-69239	115	9	1.78417	5.04437	0.00607435	0.0173479	Synthesis_of_DNA	Mcm2;Ccne2;Lig1;Cdc6;Ccne1;Ccna2;Fzr1;Gins1;Ube2c;
R-MMU-5620912	95	8	2.38421	3.35541	0.0061613	0.0174484	Anchoring_of_the_basal_body_to_the_plasma_membrane	Nek2;Cep76;Tubb4b;Plk1;Ninl;Tuba4a;Cdk1;Prkar2b;
R-MMU-179409	26	4	0.533881	7.49231	0.00622712	0.0174878	APC-Cdc20_mediated_degradation_of_Nek2A	Bub1b;Cdc20;Nek2;Ube2c;
R-MMU-176409	76	7	1.60392	4.3643	0.00629518	0.0175329	APC/C:Cdc20_mediated_degradation_of_mitotic_proteins	Bub1b;Ccnb1;Ube2c;Cdk1;Ccna2;Cdc20;Nek2;
R-MMU-4419969	14	3	0.38809	7.73017	0.00690538	0.0190747	Depolymerisation_of_the_Nuclear_Lamina	Lmna;Cdk1;Ccnb1;
R-MMU-68911	5	2	0.144878	13.8047	0.00789302	0.0216256	G2_Phase	Ccna2;E2f1;
R-MMU-2559584	16	3	0.346794	8.65067	0.0101794	0.0274436	Formation_of_Senescence-Associated_Heterochromatin_Foci_(SAHF)	H1f5;H1f3;H1f4;
R-MMU-1538133	16	3	0.458134	6.5483	0.0101794	0.0274436	G0_and_Early_G1	Ccne2;Ccna2;Ccne1;
R-MMU-2995410	65	6	1.72028	3.4878	0.0110497	0.0295536	Nuclear_Envelope_(NE)_Reassembly	Tubb4b;Ccnb2;Tuba4a;Lmna;Cdk1;Ccnb1;
R-MMU-75153	47	5	0.670203	7.46043	0.0111666	0.029631	Apoptotic_execution_phase	H1f4;H1f3;Lmna;Clspn;H1f5;
R-MMU-433692	6	2	0.172485	11.5952	0.0116142	0.030578	Proton-coupled_monocarboxylate_transport	Slc16a1;Bsg;
R-MMU-352230	31	4	0.859343	4.65472	0.0117079	0.0305858	Amino_acid_transport_across_the_plasma_membrane	Slc43a1;Slc16a10;Slc7a5;Slc6a20a;
R-MMU-2980766	48	5	1.21013	4.13179	0.0121782	0.0315695	Nuclear_Envelope_Breakdown	Lmna;Plk1;Cdk1;Ccnb1;Ccnb2;
R-MMU-597592	1242	50	35.7043	1.40039	0.0134702	0.0346523	Post-translational_protein_modification	St3gal5;Fn3krp;Yod1;Tuba4a;H2bc9;H2bc11;Asb1;H2aw;Top2a;H2bc13;Brca1;Clspn;Ube2c;H2bc7;H2bc6;B3gnt3;Birc5;H2bc8;Tubb4b;Spta1;Rad23a;H2ac4;Fbxo30;Ccnf;Cdc20;H4c11;Apol11a;Pigq;H4c4;H2bc12;Apol11b;Cdca8;Fcgr4;Blm;Otub2;Arrb1;Dtl;Cmas;Ank1;H4c1;Ccna2;Apol10a;H2ac15;Cdk1;Josd2;Aurkb;H2ac8;Art4;H2ac7;H4c8;
R-MMU-3108232	154	10	3.84736	2.59918	0.0139505	0.0356161	SUMO_E3_ligases_SUMOylate_target_proteins	Birc5;H4c8;Top2a;H4c4;H4c11;Brca1;Blm;Cdca8;Aurkb;H4c1;
R-MMU-69052	90	7	2.577	2.71633	0.0153197	0.0388177	Switching_of_origins_to_a_post-replicative_state	Ube2c;Ccna2;Fzr1;Mcm2;Ccne2;Ccne1;Cdc6;
R-MMU-445095	7	2	0.194045	10.3069	0.0159511	0.0401159	Interaction_between_L1_and_Ankyrins	Ank1;Spta1;
R-MMU-156590	34	4	0.663244	6.03096	0.0161314	0.0402688	Glutathione_conjugation	Chac2;Gclm;Mgst3;Gstm5;
R-MMU-5688426	241	14	6.98312	2.00483	0.0166643	0.0412932	Deubiquitination	Clspn;H2ac7;H2aw;Ccna2;Arrb1;H2ac8;Rad23a;H2ac15;Cdk1;H2ac4;Josd2;Cdc20;Otub2;Yod1;
R-MMU-6803157	93	7	2.67351	2.61828	0.0180677	0.0444438	Antimicrobial_peptides	Elane;S100a8;S100a9;Lcn2;Ctsg;Ltf;Camp;
R-MMU-69017	73	6	2.03194	2.95284	0.0188281	0.0459788	CDK-mediated_phosphorylation_and_removal_of_Cdc6	Cdc6;Ccne1;Ccne2;Fzr1;Ccna2;Ube2c;
R-MMU-176407	20	3	0.554415	5.41111	0.0190327	0.0461441	Conversion_from_APC/C:Cdc20_to_APC/C:Cdh1_in_late_anaphase	Cdc20;Fzr1;Ube2c;
R-MMU-140877	36	4	1.04312	3.83465	0.0195915	0.0471596	Formation_of_Fibrin_Clot_(Clotting_Cascade)	Vwf;Pf4;Gp1bb;Cd177;
R-MMU-179419	74	6	2.11887	2.8317	0.0200094	0.047487	APC:Cdc20_mediated_degradation_of_cell_cycle_proteins_prior_to_satisfation_of_the_cell_cycle_checkpoint	Nek2;Cdc20;Ccna2;Cdk1;Ube2c;Bub1b;
R-MMU-174178	74	6	2.12731	2.82046	0.0200094	0.047487	APC/C:Cdh1_mediated_degradation_of_Cdc20_and_other_APC/C:Cdh1_targeted_proteins_in_late_mitosis/early_G1	Fzr1;Ube2c;Aurka;Cdc20;Plk1;Aurkb;
R-MMU-2514853	8	2	0.223591	8.9449	0.0208653	0.0491721	Condensation_of_Prometaphase_Chromosomes	Ncaph;Ncapg;
R-MMU-141405	21	3	0.519849	5.77091	0.0217395	0.0505255	Inhibition_of_the_proteolytic_activity_of_APC/C_required_for_the_onset_of_anaphase_by_mitotic_spindle_checkpoint_components	Cdc20;Ube2c;Bub1b;
R-MMU-141430	21	3	0.6013	4.98919	0.0217395	0.0505255	Inactivation_of_APC/C_via_direct_inhibition_of_the_APC/C_complex	Ube2c;Cdc20;Bub1b;
R-MMU-917937	56	5	1.3096	3.81794	0.0225657	0.0517323	Iron_uptake_and_transport	Abcg2;Tfr2;Lcn2;Tfrc;Steap3;
R-MMU-425366	76	6	2.11545	2.83628	0.0225211	0.0517323	Transport_of_bile_salts_and_organic_acids,_metal_ions_and_amine_compounds	Bsg;Slc6a9;Slc22a4;Slc14a1;Slc16a1;Slc6a20a;
R-MMU-1592389	57	5	1.6321	3.06354	0.0241704	0.0550366	Activation_of_Matrix_Metalloproteinases	Elane;Mmp25;Mmp9;Ctsg;Mmp8;
R-MMU-2990846	159	10	4.57084	2.18778	0.0260443	0.0589056	SUMOylation	Birc5;H4c8;Top2a;H4c4;H4c11;Brca1;Blm;Cdca8;Aurkb;H4c1;
R-MMU-6804756	79	6	2.26204	2.65248	0.0266736	0.0596055	Regulation_of_TP53_Activity_through_Phosphorylation	Aurka;Aurkb;Blm;Chek1;Tpx2;Ccna2;
R-MMU-112316	323	3	9.35911	0.320543	0.0267075	0.0596055	Neuronal_System	Epb41;Prkar2b;Kcnj5;
R-MMU-210991	23	3	0.608715	4.92842	0.0277499	0.0615244	Basigin_interactions	Slc16a1;Slc7a5;Bsg;
R-MMU-74160	1046	42	24.3422	1.7254	0.0299967	0.065923	Gene_expression_(Transcription)	Gata1;H3c10;H3c4;Ccne1;H4c1;E2f8;Brpf3;H2ac15;H2bu2;Ccna2;Aurkb;H3c7;Cdk1;Cdc25c;Tpx2;H2ax;H3c11;H4c8;H2ac7;H2ac8;Gadd45a;H2ac4;H4c4;H4c11;Blm;H2bc12;H2bc13;Aurka;Ccnb1;H3c15;H2bc7;H2bc6;H2bc8;Tal1;H2bc9;Ccne2;H3c8;H2bc11;E2f7;Chek1;Steap3;Prdx2;
R-MMU-4615885	41	4	1.188	3.36701	0.030125	0.065923	SUMOylation_of_DNA_replication_proteins	Birc5;Cdca8;Top2a;Aurkb;
R-MMU-168256	1573	59	45.2197	1.30474	0.0306703	0.0666831	Immune_System	Prg2;Mmp8;Svip;Ms4a3;Fcgr4;Naprt;Mpo;Hp;Fcnb;Abca13;Stom;Ltf;Cdc20;Cenpe;Fbxo30;Ccnf;Kif18b;H3c11;Cd177;Isg15;H3c7;S100a8;Kif15;Ctse;Ube2o;Mmp9;H3c4;H3c10;Kif18a;Mettl7a1;Kif22;Ppbp;Kif23;Ctsg;Ube2l6;Ubac1;Kif2c;Asb1;Fzr1;Il1rl1;Lcn2;H3c8;Tuba4a;Slpi;Hbb-bt;Tubb4b;Mmp25;Elane;Camp;S100a9;Kifc1;Bcl2l1;Alad;Ube2c;Kif11;Fpr2;Tnfrsf14;H3c15;Kif4;
R-MMU-453279	127	8	2.97	2.6936	0.0310391	0.0670525	Mitotic_G1_phase_and_G1/S_transition	Cdc45;E2f2;Ccna2;E2f1;Cdc6;Ccne1;Mcm2;Ccne2;
R-MMU-69231	42	4	0.780972	5.12182	0.0325636	0.068587	Cyclin_D_associated_events_in_G1	E2f2;Ccne2;E2f1;Ccne1;
R-MMU-69236	42	4	0.886379	4.51274	0.0325636	0.068587	G1_Phase	Ccne1;E2f1;Ccne2;E2f2;
R-MMU-75892	10	2	0.278348	7.18525	0.0322798	0.068587	Platelet_Adhesion_to_exposed_collagen	Gp1bb;Vwf;
R-MMU-2468052	10	2	0.279489	7.15592	0.0322798	0.068587	Establishment_of_Sister_Chromatid_Cohesion	Esco2;Cdca5;
R-MMU-373760	63	5	1.74641	2.86302	0.0353355	0.0739632	L1CAM_interactions	Spta1;Tuba4a;Tubb4b;Kif4;Ank1;
R-MMU-180786	44	4	1.15446	3.46482	0.037778	0.0785876	Extension_of_Telomeres	Ccna2;Lig1;Blm;Pif1;
R-MMU-1362409	11	2	0.267283	7.48271	0.0387113	0.0785886	Mitochondrial_iron-sulfur_cluster_biogenesis	Glrx5;Isca1;
R-MMU-432047	11	2	0.278576	7.17937	0.0387113	0.0785886	Passive_transport_by_Aquaporins	Aqp1;Aqp9;
R-MMU-430116	11	2	0.291125	6.8699	0.0387113	0.0785886	GP1b-IX-V_activation_signalling	Vwf;Gp1bb;
R-MMU-5689877	11	2	0.308693	6.47893	0.0387113	0.0785886	Josephin_domain_DUBs	Josd2;Rad23a;
R-MMU-73893	46	4	0.734657	5.44472	0.0434442	0.0876687	DNA_Damage_Bypass	Dtl;Ube2l6;Pclaf;Isg15;
R-MMU-174403	12	2	0.332649	6.01234	0.0455823	0.0908949	Glutathione_synthesis_and_recycling	Chac2;Gclm;
R-MMU-68884	12	2	0.344969	5.79762	0.0455823	0.0908949	Mitotic_Telophase/Cytokinesis	Kif23;Plk1;
R-MMU-70268	28	3	0.744239	4.03096	0.046212	0.0916085	Pyruvate_metabolism	Hagh;Bsg;Slc16a1;
R-MMU-5689896	29	3	0.69473	4.31822	0.0504775	0.099479	Ovarian_tumor_domain_proteases	Yod1;Otub2;Cdk1;
R-MMU-5656169	30	3	0.787132	3.8113	0.0549272	0.105774	Termination_of_translesion_DNA_synthesis	Ube2l6;Isg15;Pclaf;
R-MMU-5626467	30	3	0.787132	3.8113	0.0549272	0.105774	RHO_GTPases_activate_IQGAPs	Tubb4b;Tuba4a;Iqgap3;
R-MMU-196807	30	3	0.862423	3.47857	0.0549272	0.105774	Nicotinate_metabolism	Naprt;Nadk2;Nmnat3;
R-MMU-68962	30	3	0.869268	3.45118	0.0549272	0.105774	Activation_of_the_pre-replicative_complex	Cdc6;Cdc45;Mcm2;
R-MMU-69656	73	5	0.574606	8.70162	0.0600678	0.11246	Cyclin_A:Cdk2-associated_events_at_S_phase_entry	Fzr1;Cdc25b;Ccna2;Ccne1;Ccne2;
R-MMU-917977	31	3	0.742642	4.03963	0.0595579	0.11246	Transferrin_endocytosis_and_recycling	Tfrc;Steap3;Tfr2;
R-MMU-174184	73	5	1.93201	2.58798	0.0600678	0.11246	Cdc20:Phospho-APC/C_mediated_degradation_of_Cyclin_A	Ccna2;Bub1b;Ube2c;Cdk1;Cdc20;
R-MMU-71406	51	4	1.4603	2.73916	0.0595803	0.11246	Pyruvate_metabolism_and_Citric_Acid_(TCA)_cycle	Bsg;Fahd1;Slc16a1;Hagh;
R-MMU-3301854	31	3	0.89117	3.36636	0.0595579	0.11246	Nuclear_Pore_Complex_(NPC)_Disassembly	Cdk1;Ccnb1;Ccnb2;
R-MMU-109581	98	6	0.581337	10.321	0.0646763	0.120419	Apoptosis	H1f3;H1f4;Bcl2l1;H1f5;Lmna;Clspn;
R-MMU-5653656	570	24	4.16153	5.76711	0.0687347	0.125321	Vesicle-mediated_transport	Ank1;Kif23;Arrb1;Hp;Kif2c;Apol11b;Optn;Tuba4a;Rab3il1;Apol11a;Itsn1;Hbb-bt;Cenpe;Tfrc;Kif18b;Spta1;Tubb4b;Kif15;Apol10a;Kifc1;Kif11;Kif18a;Kif22;Kif4;
R-MMU-174414	15	2	0.4295	4.65658	0.0685328	0.125321	Processive_synthesis_on_the_C-strand_of_the_telomere	Blm;Lig1;
R-MMU-189483	15	2	0.4295	4.65658	0.0685328	0.125321	Heme_degradation	Blvrb;Abcg2;
R-MMU-5633007	142	8	4.11453	1.94433	0.0688649	0.125321	Regulation_of_TP53_Activity	Ccna2;Chek1;Tpx2;Brpf3;Cdk1;Blm;Aurkb;Aurka;
R-MMU-1257604	226	2	6.54848	0.305414	0.0691682	0.125321	PIP3_activates_AKT_signaling	Il1rl1;Pip5k1b;
R-MMU-3299685	34	3	0.98517	3.04516	0.0744964	0.134253	Detoxification_of_Reactive_Oxygen_Species	Txnrd2;Gpx1;Prdx2;
R-MMU-190840	16	2	0.459959	4.34821	0.076869	0.137792	Microtubule-dependent_trafficking_of_connexons_from_Golgi_to_the_plasma_membrane	Tubb4b;Tuba4a;
R-MMU-437239	35	3	0.774584	3.87305	0.0798108	0.142308	Recycling_pathway_of_L1	Kif4;Tuba4a;Tubb4b;
R-MMU-442660	17	2	0.471253	4.244	0.0855048	0.149301	Na+/Cl-_dependent_neurotransmitter_transporters	Slc6a9;Slc6a20a;
R-MMU-5693579	36	3	1.0308	2.91036	0.0852853	0.149301	Homologous_DNA_Pairing_and_Strand_Exchange	Chek1;Rad51ap1;Blm;
R-MMU-190872	17	2	0.486767	4.10874	0.0855048	0.149301	Transport_of_connexons_to_the_plasma_membrane	Tuba4a;Tubb4b;
R-MMU-5686938	17	2	0.492585	4.06021	0.0855048	0.149301	Regulation_of_TLR_by_endogenous_ligand	S100a9;S100a8;
R-MMU-69002	82	5	2.25439	2.21789	0.0889712	0.154553	DNA_Replication_Pre-Initiation	Cdc6;Mcm2;E2f1;Cdc45;E2f2;
R-MMU-110313	37	3	1.05943	2.8317	0.0909151	0.156318	Translesion_synthesis_by_Y_family_DNA_polymerases_bypasses_lesions_on_DNA_template	Pclaf;Isg15;Ube2l6;
R-MMU-445717	37	3	1.05943	2.8317	0.0909151	0.156318	Aquaporin-mediated_transport	Aqp9;Prkar2b;Aqp1;
R-MMU-195721	222	2	4.7358	0.422315	0.0992085	0.169712	Signaling_by_WNT	Sox6;Pip5k1b;
R-MMU-5689880	179	9	5.12537	1.75597	0.107504	0.182974	Ub-specific_processing_proteases	H2ac8;Ccna2;Arrb1;H2aw;H2ac7;Clspn;H2ac15;H2ac4;Cdc20;
R-MMU-2559582	40	3	1.1499	2.60893	0.108688	0.18406	Senescence-Associated_Secretory_Phenotype_(SASP)	Ube2c;Ccna2;Fzr1;
R-MMU-171319	20	2	0.371891	5.37792	0.112974	0.190361	Telomere_Extension_By_Telomerase	Pif1;Ccna2;
R-MMU-4551638	64	4	1.83254	2.18277	0.114066	0.191245	SUMOylation_of_chromatin_organization_proteins	H4c8;H4c4;H4c11;H4c1;
R-MMU-1474228	137	7	3.59457	1.94738	0.120049	0.20028	Degradation_of_the_extracellular_matrix	Bsg;Capn5;Elane;Mmp25;Mmp9;Ctsg;Mmp8;
R-MMU-69190	21	2	0.44319	4.51274	0.122578	0.201506	DNA_strand_elongation	Lig1;Gins1;
R-MMU-140875	21	2	0.582136	3.43562	0.122578	0.201506	Common_Pathway_of_Fibrin_Clot_Formation	Pf4;Cd177;
R-MMU-140837	21	2	0.608487	3.28684	0.122578	0.201506	Intrinsic_Pathway_of_Fibrin_Clot_Formation	Gp1bb;Vwf;
R-MMU-9006925	252	3	6.92813	0.433017	0.124425	0.20355	Intracellular_signaling_by_second_messengers	Pip5k1b;Prkar2b;Il1rl1;
R-MMU-69206	104	6	2.88296	2.0812	0.127221	0.207118	G1/S_Transition	Cdc45;Ccna2;Cdc6;Ccne1;Ccne2;Mcm2;
R-MMU-68867	67	4	0.924823	4.32515	0.128968	0.207953	Assembly_of_the_pre-replicative_complex	E2f2;E2f1;Cdc6;Mcm2;
R-MMU-69615	67	4	1.92608	2.07676	0.128968	0.207953	G1/S_DNA_Damage_Checkpoints	Ccne2;Ccne1;Chek1;Ccna2;
R-MMU-162582	2353	79	65.4953	1.20619	0.131094	0.210375	Signal_Transduction	Epor;Pip5k1b;H3c7;Vwf;Cdc25c;Aldh1a1;Cenpn;Sppl2b;H3c10;P2ry1;Ccne1;Cenpk;Ska1;Arrb1;Ect2;H2bc12;H4c11;Bub1;Cenpe;Sgo2a;Prokr1;Dusp8;Spta1;H2bc8;Stradb;Ranbp10;Birc5;S100a9;H2bc7;H2bc13;Sgo1;Kif14;H3c15;Ppbp;Chek1;Kif2c;Arhgap11a;H2bc11;Depdc1b;H2bc9;Pf4;Prkar2b;Cenpf;H3c8;Cit;H3c11;H4c8;Xk;Aurkb;Spc24;S100a8;Cdk1;Bub1b;Sox6;Ccrl2;H2bu2;Mmp9;Kntc1;H3c4;Kif18a;Iqgap3;H4c1;Prc1;Metap2;Cdca8;H4c4;It…
R-MMU-112315	199	2	4.88079	0.40977	0.131879	0.21042	Transmission_across_Chemical_Synapses	Kcnj5;Prkar2b;
R-MMU-112409	22	2	0.629934	3.17494	0.132371	0.21042	RAF-independent_MAPK1/3_activation	Cdk1;Dusp8;
R-MMU-5357801	114	6	3.18617	1.88314	0.147377	0.233174	Programmed_Cell_Death	H1f4;H1f3;Bcl2l1;H1f5;Clspn;Lmna;
R-MMU-5668599	24	2	0.443532	4.50926	0.152451	0.238958	RHO_GTPases_Activate_NADPH_Oxidases	S100a9;S100a8;
R-MMU-1266738	462	8	11.6475	0.686843	0.15236	0.238958	Developmental_Biology	Ank1;Spta1;Tubb4b;Reln;Itsn1;Mmp9;Tuba4a;Kif4;
R-MMU-1169408	26	2	0.649555	3.07903	0.173075	0.270029	ISG15_antiviral_mechanism	Isg15;Ube2l6;
R-MMU-9668328	27	2	0.680698	2.93816	0.18355	0.283745	Sealing_of_the_nuclear_envelope_(NE)_by_ESCRT-III	Tuba4a;Tubb4b;
R-MMU-8955332	27	2	0.75462	2.65034	0.18355	0.283745	Carboxyterminal_post-translational_modifications_of_tubulin	Tubb4b;Tuba4a;
R-MMU-380108	53	3	0.979466	3.06289	0.198015	0.304575	Chemokine_receptors_bind_chemokines	Pf4;Ccrl2;Ppbp;
R-MMU-5689603	94	5	1.95163	2.56196	0.198832	0.304575	UCH_proteinases	H2ac15;H2ac4;H2ac8;H2aw;H2ac7;
R-MMU-5693568	29	2	0.671572	2.97809	0.204754	0.309427	Resolution_of_D-loop_Structures_through_Holliday_Junction_Intermediates	Rad51ap1;Blm;
R-MMU-5693537	29	2	0.80721	2.47767	0.204754	0.309427	Resolution_of_D-Loop_Structures	Rad51ap1;Blm;
R-MMU-174417	29	2	0.833676	2.39901	0.204754	0.309427	Telomere_C-strand_(Lagging_Strand)_Synthesis	Blm;Lig1;
R-MMU-432040	30	2	0.8282	2.41488	0.215456	0.322705	Vasopressin_regulates_renal_water_homeostasis_via_Aquaporins	Aqp1;Prkar2b;
R-MMU-1169410	30	2	0.869268	2.30079	0.215456	0.322705	Antiviral_mechanism_by_IFN-stimulated_genes	Ube2l6;Isg15;
R-MMU-382551	651	24	8.16906	2.93791	0.223058	0.332613	Transport_of_small_molecules	Slc22a4;Lcn2;Stom;Car2;Slc43a1;Steap3;Aqp9;Hbb-bt;Slc6a20a;Tfrc;Atp2b4;Prkar2b;Dmtn;Slc7a5;Bsg;Slc6a9;Abcb9;Abcb4;Tfr2;Slc14a1;Aqp1;Slc16a10;Slc16a1;Abcg2;
R-MMU-1430728	1750	43	50.1084	0.85814	0.232896	0.345754	Metabolism	Slc25a21;Odc1;Pip5k1b;Uros;Pnpo;Aldh1a1;Abcg2;Gch1;Nmnat3;Smox;Alas2;Glrx5;Mpst;Ppox;Bpgm;Urod;Nt5c3;Naprt;Blvrb;Rrm2;Slc7a5;Cpox;Isca1;Hmmr;Asns;Bsg;B3gnt3;Alad;Slc16a1;Hagh;Mgst3;Pcyt1b;Ptdss2;Nadk2;Car2;Fahd1;Chac2;Hmbs;Gstm5;Nqo1;Prkar2b;Gclm;Gpx1;
R-MMU-5685942	58	3	1.61442	1.85825	0.236084	0.348769	HDR_through_Homologous_Recombination_(HRR)	Blm;Rad51ap1;Chek1;
R-MMU-190861	32	2	0.890714	2.24539	0.236997	0.348769	Gap_junction_assembly	Tubb4b;Tuba4a;
R-MMU-397014	166	2	4.60164	0.434627	0.244383	0.355327	Muscle_contraction	Tmod1;Atp2b4;
R-MMU-351202	59	3	1.6961	1.76876	0.243853	0.355327	Metabolism_of_polyamines	Nqo1;Smox;Odc1;
R-MMU-202733	108	5	3.10472	1.61045	0.244617	0.355327	Cell_surface_interactions_at_the_vascular_wall	Bsg;Pf4;Slc16a1;Cd177;Slc7a5;
R-MMU-983712	171	2	4.74025	0.421919	0.245808	0.355375	Ion_channel_transport	Stom;Atp2b4;
R-MMU-4085001	33	2	0.944901	2.11662	0.247813	0.355375	Sialic_acid_metabolism	Cmas;St3gal5;
R-MMU-5693616	33	2	0.944901	2.11662	0.247813	0.355375	Presynaptic_phase_of_homologous_DNA_pairing_and_strand_exchange	Chek1;Blm;
R-MMU-418594	346	6	9.90714	0.605624	0.249639	0.356477	G_alpha_(i)_signalling_events	Metap2;Ppbp;Fpr2;Gpsm2;Pf4;Prkar2b;
R-MMU-6783310	34	2	0.283139	7.06367	0.258646	0.362879	Fanconi_Anemia_Pathway	Fancd2;Fanci;
R-MMU-6804757	34	2	0.736938	2.71393	0.258646	0.362879	Regulation_of_TP53_Degradation	Ccna2;Cdk1;
R-MMU-6806003	34	2	0.946384	2.11331	0.258646	0.362879	Regulation_of_TP53_Expression_and_Degradation	Cdk1;Ccna2;
R-MMU-187577	61	3	1.74663	1.71759	0.259507	0.362879	SCF(Skp2)-mediated_degradation_of_p27/p21	Ccne2;Ccna2;Ccne1;
R-MMU-71387	264	4	7.55921	0.529156	0.258692	0.362879	Metabolism_of_carbohydrates	Hmmr;Bpgm;B3gnt3;Aldh1a1;
R-MMU-111465	35	2	0.942277	2.12252	0.269484	0.372197	Apoptotic_cleavage_of_cellular_proteins	Clspn;Lmna;
R-MMU-8956319	35	2	0.978211	2.04455	0.269484	0.372197	Nucleobase_catabolism	Nt5c3;Gpx1;
R-MMU-76009	35	2	1.00217	1.99568	0.269484	0.372197	Platelet_Aggregation_(Plug_Formation)	Vwf;Gp1bb;
R-MMU-500792	382	7	6.44946	1.08536	0.272337	0.374602	GPCR_ligand_binding	P2ry1;Fpr2;Pf4;Ccrl2;Ppbp;Prokr1;Xk;
R-MMU-5617833	194	8	1.99179	4.0165	0.276986	0.378919	Cilium_Assembly	Tubb4b;Cep76;Nek2;Ninl;Cdk1;Plk1;Tuba4a;Prkar2b;
R-MMU-1280218	666	24	19.1458	1.25354	0.277724	0.378919	Adaptive_Immune_System	Fzr1;Asb1;Kif2c;Fcgr4;Ubac1;Ube2l6;Kif23;Ccnf;Fbxo30;Cenpe;Cdc20;Tuba4a;Ctse;Kif15;Tubb4b;Kif18b;Kif4;Kif22;Tnfrsf14;Kif18a;Kif11;Ube2c;Ube2o;Kifc1;
R-MMU-9646399	37	2	0.886379	2.25637	0.291143	0.394036	Aggrephagy	Tuba4a;Tubb4b;
R-MMU-1433557	37	2	0.979238	2.0424	0.291143	0.394036	Signaling_by_SCF-KIT	Chek1;Mmp9;
R-MMU-425407	224	9	6.235	1.44346	0.308179	0.415425	SLC-mediated_transmembrane_transport	Slc43a1;Slc16a1;Bsg;Slc6a9;Slc16a10;Slc6a20a;Slc22a4;Slc14a1;Slc7a5;
R-MMU-5674135	39	2	1.08556	1.84237	0.312719	0.419866	MAP2K_and_MAPK_activation	Arrb1;Vwf;
R-MMU-190828	40	2	1.15902	1.72559	0.323458	0.432561	Gap_junction_trafficking	Tuba4a;Tubb4b;
R-MMU-156580	92	4	2.24595	1.78098	0.342747	0.454747	Phase_II_-_Conjugation_of_compounds	Gclm;Chac2;Mgst3;Gstm5;
R-MMU-6807878	92	4	2.66575	1.50051	0.342747	0.454747	COPI-mediated_anterograde_transport	Ank1;Tubb4b;Tuba4a;Spta1;
R-MMU-157858	42	2	1.16427	1.71781	0.3448	0.455677	Gap_junction_trafficking_and_regulation	Tubb4b;Tuba4a;
R-MMU-199991	537	19	15.4374	1.23078	0.351687	0.462963	Membrane_Trafficking	Kif15;Tubb4b;Spta1;Kif18b;Kif4;Kif22;Kif18a;Kif11;Kifc1;Kif2c;Arrb1;Ank1;Kif23;Tfrc;Cenpe;Itsn1;Optn;Tuba4a;Rab3il1;
R-MMU-166658	45	2	1.25257	1.59672	0.376385	0.493548	Complement_cascade	Elane;Fcnb;
R-MMU-1483257	186	3	3.45859	0.867406	0.379447	0.495634	Phospholipid_metabolism	Ptdss2;Pcyt1b;Pip5k1b;
R-MMU-416476	198	3	5.51129	0.544337	0.385322	0.501365	G_alpha_(q)_signalling_events	P2ry1;Fpr2;Prokr1;
R-MMU-114608	115	5	1.71857	2.90939	0.389475	0.504819	Platelet_degranulation_	Brpf3;Tuba4a;Vwf;Pf4;Ppbp;
R-MMU-193648	47	2	1.30824	1.52878	0.397093	0.512722	NRAGE_signals_death_through_JNK	Ect2;Itsn1;
R-MMU-76005	120	5	3.34018	1.49693	0.400677	0.515374	Response_to_elevated_platelet_cytosolic_Ca2+	Vwf;Pf4;Brpf3;Tuba4a;Ppbp;
R-MMU-392499	1584	51	45.5359	1.12	0.407776	0.522512	Metabolism_of_proteins	H2bc11;Asb1;Top2a;Ctsg;H2aw;Yod1;St3gal5;Fn3krp;H2bc9;Tuba4a;H2bc8;Tubb4b;Rad23a;Spta1;H2bc13;Birc5;B3gnt3;H2bc6;H2bc7;Brca1;Ube2c;Clspn;Blm;Fcgr4;Cdca8;Otub2;H2bc12;Apol11b;Dtl;Ank1;Cmas;Arrb1;Cdc20;H2ac4;Ccnf;Fbxo30;Pigq;H4c4;H4c11;Apol11a;Aurkb;Josd2;Cdk1;H4c8;H2ac8;H2ac7;Art4;H4c1;Apol10a;H2ac15;Ccna2;
R-MMU-69563	65	3	1.59423	1.88179	0.438016	0.557024	p53-Dependent_G1_DNA_Damage_Response	Ccna2;Ccne1;Ccne2;
R-MMU-69580	65	3	1.70545	1.75906	0.438016	0.557024	p53-Dependent_G1/S_DNA_damage_checkpoint	Ccne2;Ccne1;Ccna2;
R-MMU-168898	140	2	3.86493	0.517473	0.443589	0.559886	Toll-like_Receptor_Cascades	S100a8;S100a9;
R-MMU-112314	136	2	3.75451	0.532693	0.442276	0.559886	Neurotransmitter_receptors_and_postsynaptic_signal_transmission	Kcnj5;Prkar2b;
R-MMU-201681	144	2	4.17248	0.479331	0.446442	0.561384	TCF_dependent_signaling_in_response_to_WNT	Sox6;Pip5k1b;
R-MMU-5673001	256	5	7.0381	0.710419	0.451447	0.565567	RAF/MAP_kinase_cascade	Bcl2l1;Spta1;Arrb1;Dusp8;Vwf;
R-MMU-68949	70	3	1.30162	2.30482	0.457698	0.571275	Orc1_removal_from_chromatin	Cdc6;Mcm2;Ccna2;
R-MMU-69202	71	3	1.97627	1.51801	0.461987	0.574501	Cyclin_E_associated_events_during_G1/S_transition_	Ccna2;Ccne1;Ccne2;
R-MMU-163125	79	3	2.27105	1.32098	0.499459	0.618815	Post-translational_modification:_synthesis_of_GPI-anchored_proteins	Fcgr4;Pigq;Art4;
R-MMU-425393	99	4	2.77823	1.43976	0.536183	0.661882	Transport_of_inorganic_cations/anions_and_amino_acids/oligopeptides	Slc6a20a;Slc7a5;Slc43a1;Slc16a10;
R-MMU-1852241	222	8	6.35661	1.25853	0.538692	0.662551	Organelle_biogenesis_and_maintenance	Prkar2b;Tuba4a;Plk1;Cdk1;Ninl;Tubb4b;Nek2;Cep76;
R-MMU-1474244	270	9	6.16016	1.461	0.581596	0.710137	Extracellular_matrix_organization	Mmp9;Bsg;Vwf;Capn5;Elane;Mmp25;Emilin2;Ctsg;Mmp8;
R-MMU-196849	116	4	3.36117	1.19006	0.580271	0.710137	Metabolism_of_water-soluble_vitamins_and_cofactors	Naprt;Pnpo;Nmnat3;Nadk2;
R-MMU-5683057	285	6	7.21766	0.831294	0.587626	0.714909	MAPK_family_signaling_cascades	Dusp8;Arrb1;Spta1;Cdk1;Vwf;Bcl2l1;
R-MMU-168249	926	29	24.2961	1.19361	0.605756	0.731684	Innate_Immune_System	Abca13;Lcn2;Stom;Fcnb;Naprt;Hp;Mpo;Fcgr4;Svip;Ms4a3;Ctsg;Prg2;Mmp8;Ppbp;Hbb-bt;Slpi;Ltf;Camp;Elane;Tubb4b;S100a8;Mmp25;Cd177;Mettl7a1;Fpr2;Mmp9;Bcl2l1;Alad;S100a9;
R-MMU-194840	139	5	3.99589	1.25128	0.604085	0.731684	Rho_GTPase_cycle	Itsn1;Depdc1b;Ect2;Ccne1;Arhgap11a;
R-MMU-6811436	48	2	1.33607	1.49693	0.650199	0.782561	COPI-independent_Golgi-to-ER_retrograde_traffic	Tuba4a;Tubb4b;
R-MMU-375276	184	6	4.26101	1.40812	0.657766	0.785659	Peptide_ligand-binding_receptors	Xk;Pf4;Prokr1;Ppbp;Ccrl2;Fpr2;
R-MMU-350562	51	2	1.46612	1.36415	0.659767	0.785659	Regulation_of_ornithine_decarboxylase_(ODC)	Odc1;Nqo1;
R-MMU-3371497	50	2	1.44878	1.38047	0.656467	0.785659	HSP90_chaperone_cycle_for_steroid_hormone_receptors_(SHR)	Tuba4a;Tubb4b;
R-MMU-432722	52	2	1.48893	1.34324	0.663167	0.786927	Golgi_Associated_Vesicle_Biogenesis	Arrb1;Tfrc;
R-MMU-5620924	55	2	0.432923	4.61976	0.673876	0.794043	Intraflagellar_transport	Tuba4a;Tubb4b;
R-MMU-1442490	55	2	1.59366	1.25497	0.673876	0.794043	Collagen_degradation	Mmp9;Mmp8;
R-MMU-5684996	262	6	5.55921	1.07929	0.708228	0.813646	MAPK1/MAPK3_signaling	Bcl2l1;Arrb1;Dusp8;Spta1;Cdk1;Vwf;
R-MMU-2682334	65	2	1.40144	1.42711	0.713013	0.813646	EPH-Ephrin_signaling	Itsn1;Mmp9;
R-MMU-8878166	63	2	1.59548	1.25354	0.704936	0.813646	Transcriptional_regulation_by_RUNX2	Ccnb1;Cdk1;
R-MMU-913531	62	2	1.62674	1.22945	0.700927	0.813646	Interferon_Signaling	Ube2l6;Isg15;
R-MMU-9663891	65	2	1.70545	1.17271	0.713013	0.813646	Selective_autophagy	Tuba4a;Tubb4b;
R-MMU-204998	65	2	1.81668	1.10091	0.713013	0.813646	Cell_death_signalling_via_NRAGE,_NRIF_and_NADE	Itsn1;Ect2;
R-MMU-983168	282	9	8.07461	1.11461	0.71704	0.813646	Antigen_processing:_Ubiquitination_&_Proteasome_degradation	Ubac1;Ube2l6;Asb1;Fzr1;Ube2o;Ube2c;Cdc20;Ccnf;Fbxo30;
R-MMU-76002	241	8	6.90064	1.15931	0.694206	0.813646	Platelet_activation,_signaling_and_aggregation	Ppbp;Pf4;Gp1bb;Arrb1;Tuba4a;P2ry1;Vwf;Brpf3;
R-MMU-174084	64	2	1.83984	1.08705	0.708967	0.813646	Autodegradation_of_Cdh1_by_Cdh1:APC/C	Ube2c;Fzr1;
R-MMU-446219	61	2	1.75359	1.14052	0.696943	0.813646	Synthesis_of_substrates_in_N-glycan_biosythesis	St3gal5;Cmas;
R-MMU-8939236	66	2	1.91239	1.04581	0.717071	0.813646	RUNX1_regulates_transcription_of_genes_involved_in_differentiation_of_HSCs	Tal1;Gata1;
R-MMU-373076	297	7	8.50411	0.823132	0.724572	0.819399	Class_A/1_(Rhodopsin-like_receptors)	Prokr1;Xk;Ppbp;Ccrl2;Pf4;P2ry1;Fpr2;
R-MMU-15869	95	3	2.04826	1.46466	0.755926	0.851997	Metabolism_of_nucleotides	Rrm2;Nt5c3;Gpx1;
R-MMU-8856825	98	3	2.32535	1.29013	0.762186	0.85424	Cargo_recognition_for_clathrin-mediated_endocytosis	Itsn1;Tfrc;Arrb1;
R-MMU-446652	106	2	2.64819	0.755234	0.771569	0.85424	Interleukin-1_family_signaling	Il1rl1;Ctsg;
R-MMU-1630316	118	2	3.37874	0.591937	0.777991	0.85424	Glycosaminoglycan_metabolism	B3gnt3;Hmmr;
R-MMU-1483206	114	2	3.2642	0.612707	0.774992	0.85424	Glycerophospholipid_biosynthesis	Ptdss2;Pcyt1b;
R-MMU-199418	103	2	2.96099	0.675451	0.771284	0.85424	Negative_regulation_of_the_PI3K/AKT_network	Il1rl1;Pip5k1b;
R-MMU-211945	111	2	3.19096	0.62677	0.773282	0.85424	Phase_I_-_Functionalization_of_compounds	Aldh1a1;Smox;
R-MMU-9612973	121	4	3.50605	1.14089	0.78073	0.85424	Autophagy	Tuba4a;Tubb4b;Wipi1;Atg4a;
R-MMU-9007101	110	2	3.18731	0.627487	0.772822	0.85424	Rab_regulation_of_trafficking	Optn;Rab3il1;
R-MMU-1632852	121	4	3.50605	1.14089	0.78073	0.85424	Macroautophagy	Atg4a;Tubb4b;Wipi1;Tuba4a;
R-MMU-948021	171	4	3.14066	1.27362	0.820174	0.894494	Transport_to_the_Golgi_and_subsequent_modification	Tubb4b;Ank1;Tuba4a;Spta1;
R-MMU-8951664	214	5	6.12754	0.815988	0.835689	0.908475	Neddylation	Dtl;Birc5;Asb1;Fbxo30;Ccnf;
R-MMU-449147	258	8	6.94593	1.15175	0.849297	0.91184	Signaling_by_Interleukins	H3c7;Il1rl1;H3c11;Ctsg;H3c4;H3c10;H3c15;H3c8;
R-MMU-422475	258	8	7.18138	1.11399	0.849297	0.91184	Axon_guidance	Kif4;Reln;Itsn1;Tuba4a;Mmp9;Tubb4b;Ank1;Spta1;
R-MMU-446203	256	6	7.12571	0.842021	0.848725	0.91184	Asparagine_N-linked_glycosylation	Cmas;Ank1;Spta1;Tubb4b;Tuba4a;St3gal5;
R-MMU-9675108	259	8	7.41604	1.07874	0.849607	0.91184	Nervous_system_development	Kif4;Reln;Tuba4a;Mmp9;Itsn1;Tubb4b;Ank1;Spta1;
R-MMU-5610787	106	3	0.858544	3.49429	1	1	Hedgehog_'off'_state	Tuba4a;Prkar2b;Tubb4b;
R-MMU-196854	178	5	1.74629	2.86321	1	1	Metabolism_of_vitamins_and_cofactors	Nmnat3;Gch1;Pnpo;Naprt;Nadk2;
R-MMU-211859	209	6	2.76569	2.16944	1	1	Biological_oxidations	Gclm;Chac2;Mgst3;Gstm5;Aldh1a1;Smox;
R-MMU-193704	80	2	1.1499	1.73929	1	1	p75_NTR_receptor-mediated_signalling	Itsn1;Ect2;
R-MMU-199992	68	2	1.26443	1.58174	1	1	trans-Golgi_Network_Vesicle_Budding	Tfrc;Arrb1;
R-MMU-71291	247	7	4.95916	1.41153	1	1	Metabolism_of_amino_acids_and_derivatives	Odc1;Nqo1;Slc25a21;Mpst;Smox;Slc7a5;Asns;
R-MMU-8957275	113	3	2.44924	1.22487	1	1	Post-translational_protein_phosphorylation	Apol10a;Apol11a;Apol11b;
R-MMU-382556	99	2	2.3152	0.863858	1	1	ABC-family_proteins_mediated_transport	Abcb9;Abcb4;
R-MMU-6811558	96	2	2.2998	0.869643	1	1	PI5P,_PP2A_and_IER3_Regulate_PI3K/AKT_Signaling	Il1rl1;Pip5k1b;
R-MMU-416482	69	2	1.67659	1.1929	1	1	G_alpha_(12/13)_signalling_events	Ect2;Itsn1;
R-MMU-8856828	136	3	3.56833	0.840729	1	1	Clathrin-mediated_endocytosis	Arrb1;Itsn1;Tfrc;
R-MMU-446193	71	2	1.87908	1.06435	1	1	Biosynthesis_of_the_N-glycan_precursor_(dolichol_lipid-linked_oligosaccharide,_LLO)_and_transfer_to_a_nascent_protein	Cmas;St3gal5;
R-MMU-1280215	378	11	10.1766	1.08091	1	1	Cytokine_Signaling_in_Immune_system	H3c8;H3c15;Tnfrsf14;H3c10;H3c4;Isg15;Ube2l6;Ctsg;H3c11;Il1rl1;H3c7;
R-MMU-73887	120	3	3.23066	0.928602	1	1	Death_Receptor_Signalling	Sppl2b;Ect2;Itsn1;
R-MMU-381426	119	3	3.20374	0.936405	1	1	Regulation_of_Insulin-like_Growth_Factor_(IGF)_transport_and_uptake_by_Insulin-like_Growth_Factor_Binding_Proteins_(IGFBPs)	Apol11b;Apol11a;Apol10a;
R-MMU-1428517	165	4	4.53628	0.88178	1	1	The_citric_acid_(TCA)_cycle_and_respiratory_electron_transport	Hagh;Bsg;Slc16a1;Fahd1;
R-MMU-5358351	137	4	3.79774	1.05326	1	1	Signaling_by_Hedgehog	Tuba4a;Arrb1;Prkar2b;Tubb4b;
R-MMU-216083	69	2	1.9206	1.04134	1	1	Integrin_cell_surface_interactions	Bsg;Vwf;
R-MMU-3108214	71	2	2.03297	0.983783	1	1	SUMOylation_of_DNA_damage_response_and_repair_proteins	Blm;Brca1;
R-MMU-199977	143	4	4.09457	0.976904	1	1	ER_to_Golgi_Anterograde_Transport	Ank1;Tuba4a;Spta1;Tubb4b;
R-MMU-5696398	99	2	2.86858	0.697208	1	1	Nucleotide_Excision_Repair	Rad23a;Lig1;
R-MMU-174154	68	2	1.97034	1.01505	1	1	APC/C:Cdc20_mediated_degradation_of_Securin	Ube2c;Cdc20;
R-MMU-983169	340	9	9.8517	0.913548	1	1	Class_I_MHC_mediated_antigen_processing_&_presentation	Ube2c;Ube2o;Ccnf;Fbxo30;Cdc20;Ube2l6;Ubac1;Fzr1;Asb1;
Table S4f: Results of 487 DEGs (up-regulated in ADM mice+C3G Vs ADM mice comparison) in panther enrichment analysis for biological function
Sr. No.	Biological Function	No. of Genes
1	cellular process (GO:0009987)	225	56.0%	31.3%
2	biological phase (GO:0044848)	5	1.2%	0.7%
3	reproductive process (GO:0022414)	12	3.0%	1.7%
4	multi-organism process (GO:0051704)	1	0.2%	0.1%
5	localization (GO:0051179)	49	12.2%	6.8%
6	interspecies interaction between organisms (GO:0044419)	14	3.5%	1.9%
7	reproduction (GO:0000003)	12	3.0%	1.7%
8	biological regulation (GO:0065007)	115	28.6%	16.0%
9	response to stimulus (GO:0050896)	57	14.2%	7.9%
10	signaling (GO:0023052)	24	6.0%	3.3%
11	developmental process (GO:0032502)	16	4.0%	2.2%
12	multicellular organismal process (GO:0032501)	21	5.2%	2.9%
13	locomotion (GO:0040011)	6	1.5%	0.8%
14	biological adhesion (GO:0022610)	6	1.5%	0.8%
15	metabolic process (GO:0008152)	131	32.6%	18.2%
16	immune system process (GO:0002376)	24	6.0%	3.3%
Table S5a: Results of 53 DEGs (down-regulated in ADM mice+C3G Vs ADM mice comparison) according to molecular function in panther enrichment analysis for molecular function
Sr. No.	Molecular Function	No. of Genes
1	binding (GO:0005488)	2	0.087	0.222
2	molecular function regulator (GO:0098772)	1	0.043	0.111
3	catalytic activity (GO:0003824)	4	0.174	0.444
4	transporter activity (GO:0005215)	2	0.087	0.222
Table S5b: Results of 53 DEGs (down-regulated in ADM mice+C3G Vs ADM mice comparison) according to cellular component in panther enrichment analysis for cellular components
Sr. No.	Cellular Component	No. of Genes
1	cellular anatomical entity (GO:0110165)	13	56.5%	68.4%
2	protein-containing complex (GO:0032991)	1	4.3%	5.3%
3	intracellular (GO:0005622)	5	21.7%	26.3%
Table S5c: Results of 53 DEGs (down-regulated in ADM mice+C3G Vs ADM mice comparison) according to protein class in panther enrichment analysis for protein class
Sr. No.	Protein Class	No. of Genes
1	protein modifying enzyme (PC00260)	2	8.7%	13.3%
2	transporter (PC00227)	2	8.7%	13.3%
3	membrane traffic protein (PC00150)	1	4.3%	6.7%
4	chaperone (PC00072)	1	4.3%	6.7%
5	cell adhesion molecule (PC00069)	2	8.7%	13.3%
6	defense/immunity protein (PC00090)	3	13.0%	20.0%
7	intercellular signal molecule (PC00207)	1	4.3%	6.7%
8	gene-specific transcriptional regulator (PC00264)	1	4.3%	6.7%
9	translational protein (PC00263)	1	4.3%	6.7%
10	metabolite interconversion enzyme (PC00262)	1	4.3%	6.7%
Table S5d: Results of 53 DEGs (down-regulated in ADM mice+C3G Vs ADM mice comparison) according to pathways in panther enrichment analysis for pathways
Sr. No.	Pathways	No. of Genes
1	Cadherin signaling pathway (P00012)	2	8.7%	18.2%
2	Histamine H1 receptor mediated signaling pathway (P04385)	1	4.3%	9.1%
3	Insulin/IGF pathway-protein kinase B signaling cascade (P00033)	1	4.3%	9.1%
4	Insulin/IGF pathway-mitogen activated protein kinase kinase/MAP kinase cascade (P00032)	1	4.3%	9.1%
5	Inflammation mediated by chemokine and cytokine signaling pathway (P00031)	1	4.3%	9.1%
6	Wnt signaling pathway (P00057)	2	8.7%	18.2%
7	5HT2 type receptor mediated signaling pathway (P04374)	1	4.3%	9.1%
8	Thyrotropin-releasing hormone receptor signaling pathway (P04394)	1	4.3%	9.1%
9	Oxytocin receptor mediated signaling pathway (P04391)	1	4.3%	9.1%
Table S5e: Results of 53 DEGs (down-regulated in ADM mice+C3G Vs ADM mice comparison) in panther enrichment analysis for biological function
Sr. No.	Biological Function	No. of Genes
1	cellular process (GO:0009987)	9	0.391	0.31
2	interspecies interaction between organisms (GO:0044419)	1	0.043	0.034
3	biological regulation (GO:0065007)	4	0.174	0.138
4	response to stimulus (GO:0050896)	6	0.261	0.207
5	signaling (GO:0023052)	1	0.043	0.034
6	developmental process (GO:0032502)	1	0.043	0.034
7	biological adhesion (GO:0022610)	2	0.087	0.069
8	multicellular organismal process (GO:0032501)	1	0.043	0.034
9	metabolic process (GO:0008152)	1	0.043	0.034
10	immune system process (GO:0002376)	3	0.13	0.103
Table S6a: PPN1 Network stats of protein-protein interaction network from STRING
Sr. No.	No. of nodes	No. of edges	Average node degree	Expected no. of edges	Averge local clustering coefficient	PPI enrichment p-value
1	839	3748	8.93	1364	0.432	< 1.0e-16
Table S6b: PPN2 Network stats of protein-protein interaction network from STRING
Sr. No.	No. of nodes	No. of edges	Average node degree	Expected no. of edges	Averge local clustering coefficient	PPI enrichment p-value
1	463	6429	27.8	1986	0.546	< 1.0e-16
